# Supplementary material for: Genome-wide analysis of polymerase III–transcribed Alu elements suggests cell-type–specific enhancer function
Source: PubMed Central journal article supplement — Genome Res. 2019 Sep;29(9):1402–14. doi: 10.1101/gr.249789.119 (PMC6724667; doi:10.1101/gr.249789.119), 2019-09
Supplement: supp_gr.249789.119_Supplemental_Fig_S1.pdf [file supp_gr.249789.119_Supplemental_Fig_S1.pdf]

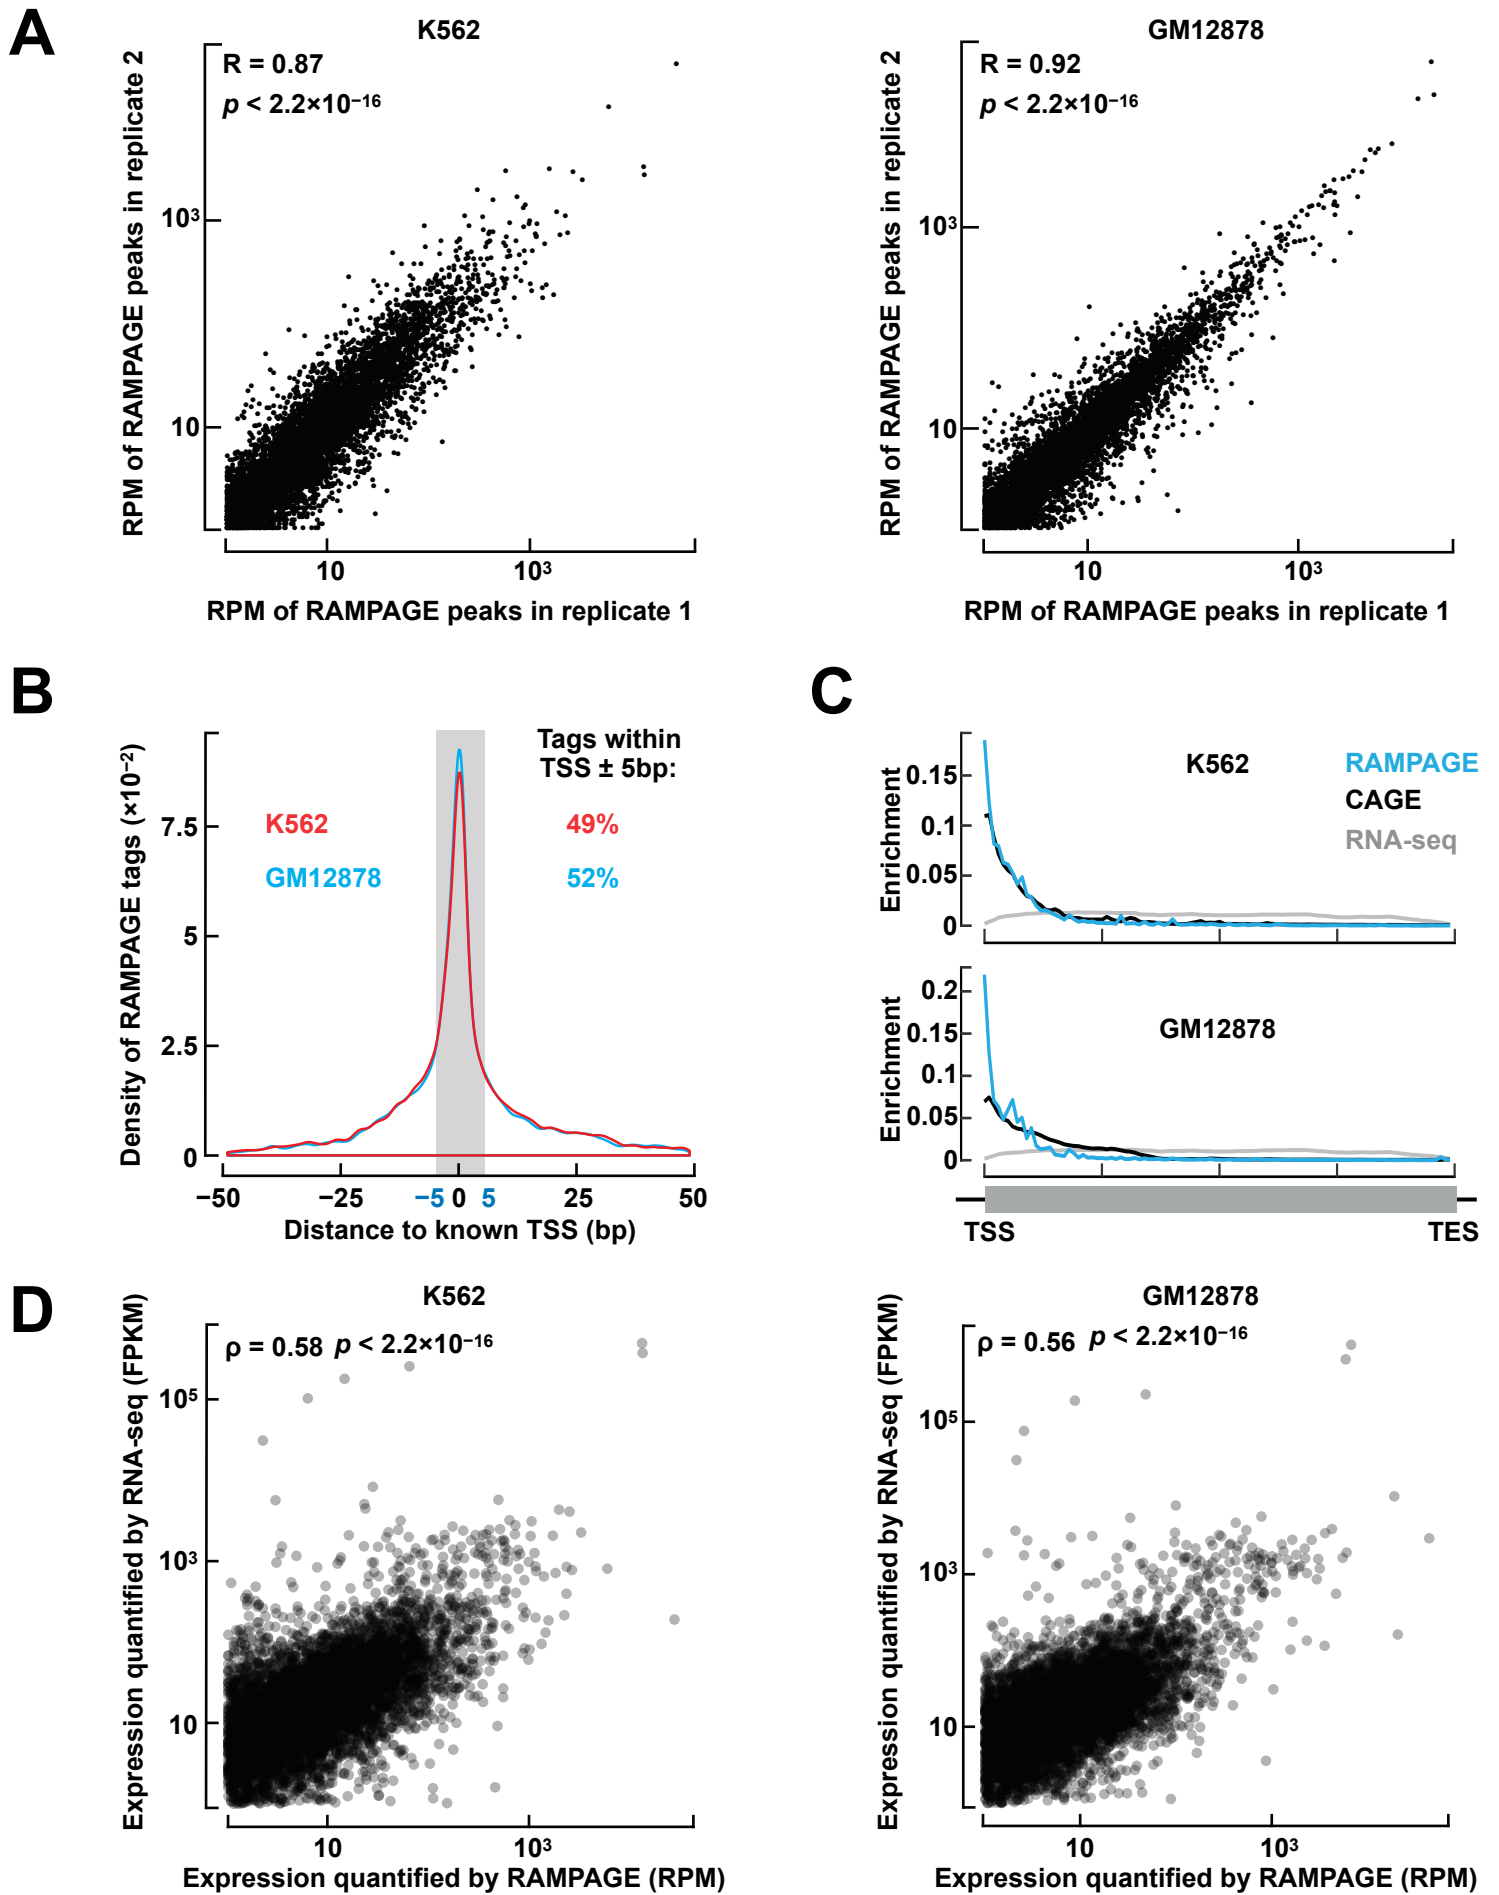

**Supplemental Figure S1. RAMPAGE data facilitate the identification of TSSs.**

A. High correlation of RAMPAGE signal levels between biological replicates. Pearson correlation coefficients (R) are 0.87 for K562 and 0.92 for GM12878. The mean  $\pm$  sd for R across 70 RAMPAGE biosamples each with two biological replicates are  $0.79 \pm 0.16$ .

B. Roughly 50% of RAMPAGE peaks are located within the  $\pm 5$  bp window (grey box) of known TSSs.

C. RAMPAGE reads (blue line) show a stronger enrichment than CAGE reads (black line) at the 5'-ends of genes. In contrast, RNA-seq reads (grey line) show an even distribution over the entire gene body.

D. Expression quantification by RAMPAGE is positively correlated with expression quantification by RNA-seq—Spearman's rank correlation coefficients are 0.56 and 0.58 in two cell lines: K562 and GM12878.
