# Supplementary material for: Genome-wide analysis of polymerase III–transcribed Alu elements suggests cell-type–specific enhancer function
Source: PubMed Central journal article supplement — Genome Res. 2019 Sep;29(9):1402–14. doi: 10.1101/gr.249789.119 (PMC6724667; doi:10.1101/gr.249789.119), 2019-09
Supplement: supp_gr.249789.119_Supplemental_Fig_S3.pdf [file supp_gr.249789.119_Supplemental_Fig_S3.pdf]

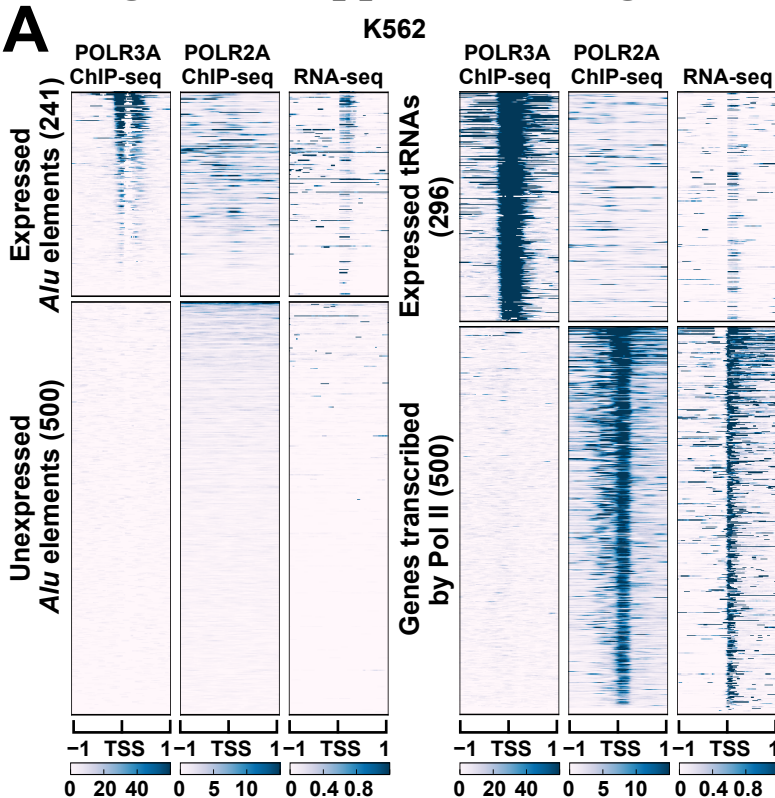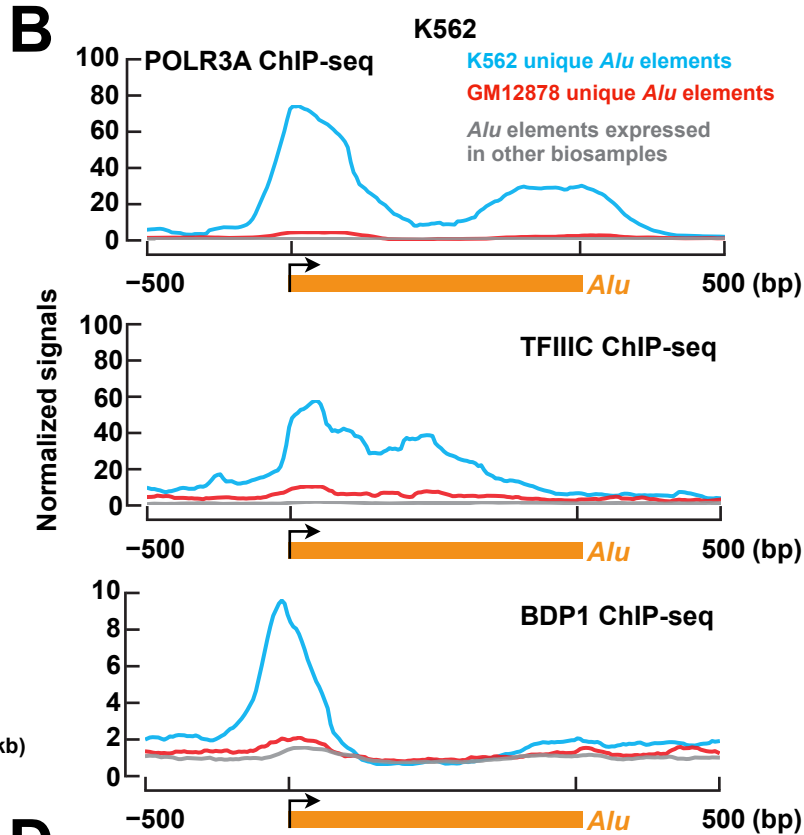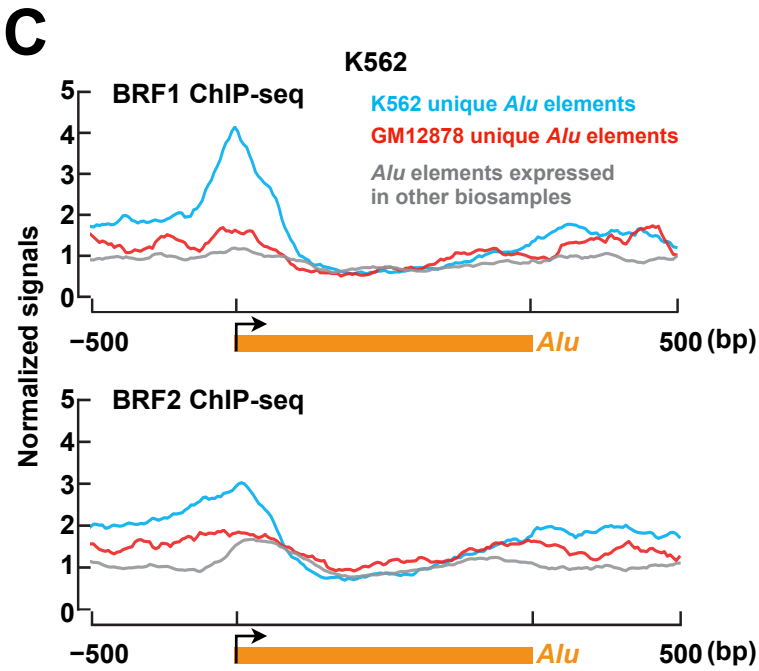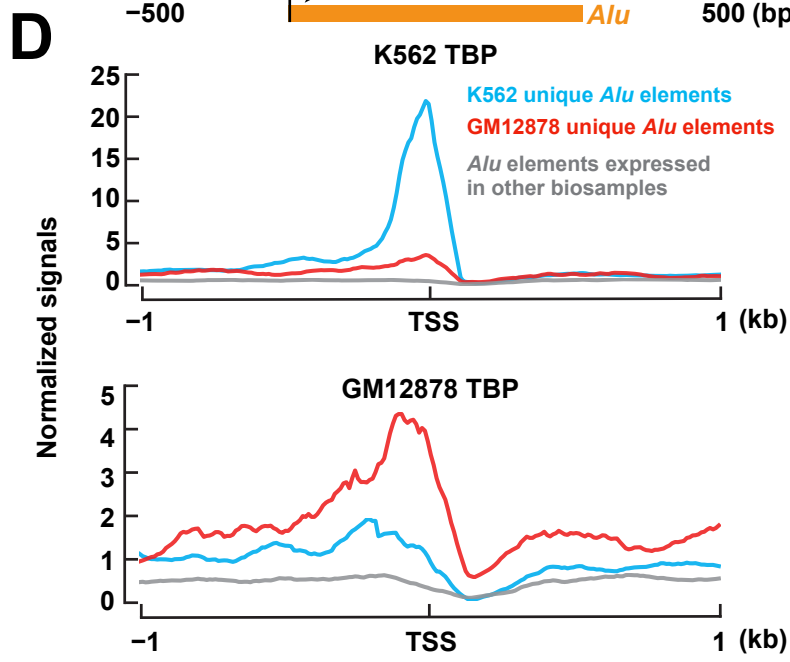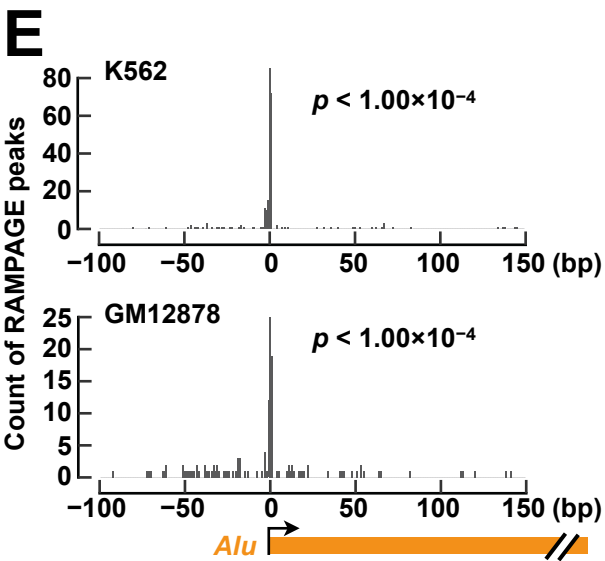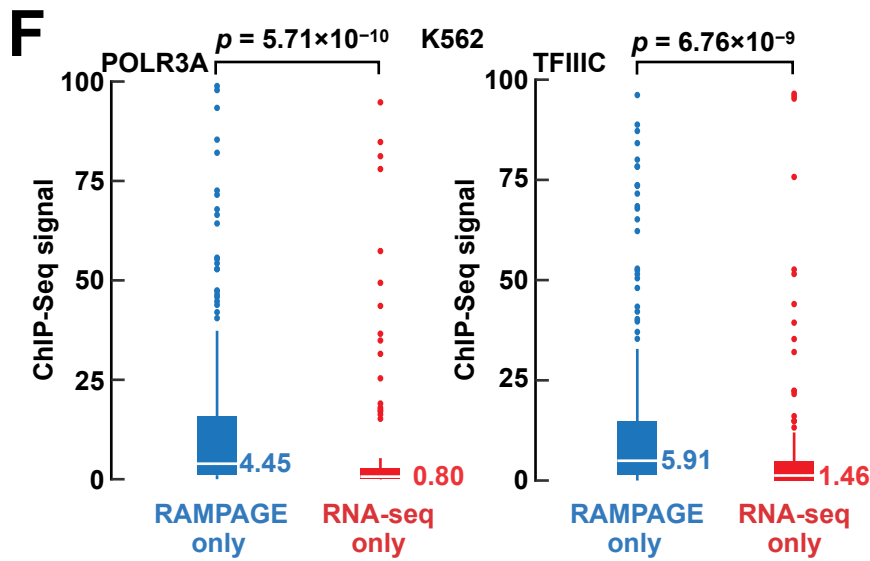

### Supplemental Figure S3. Computational validation of expressed *Alu* elements.

A. Heatmap of normalized read densities for POLR3A ChIP-seq, POLR2A ChIP-seq, and total RNA-seq around the TSSs of expressed *Alu* elements defined by RAMPAGE, unexpressed *Alu* elements (randomly sampled, N = 500), expressed tRNAs (Raha et al. 2010), and expressed, Pol II-transcribed genes (randomly sampled, N = 500). Note that most of the RAMPAGE-defined expressed *Alu* elements show high POLR3A ChIP-seq signals, albeit not as high as expressed tRNAs, and both groups have detectable RNA-seq signals.

B. *Alu* elements specifically expressed in K562 cells (blue lines), but not *Alu* elements specifically expressed in GM12878 cells (red lines) or *Alu* elements expressed in other biosamples (grey lines), showed high ChIP-seq signals of POLR3A (top), TFIIC (middle), and BDP1 (bottom) in K562.

C. *Alu* elements specifically expressed in K562 cells (blue lines) showed higher BRF1 ChIP-seq signals but similar BRF2 ChIP-seq signals compared with *Alu* elements specifically expressed in GM12878 cells (red lines) or *Alu* elements expressed in other biosamples (grey lines).

D. The binding of TBP exhibited specific profiles for *Alu* elements expressed uniquely in K562 cells (blue) and in GM12878 cells (red). Note that *Alu* elements expressed in the corresponding cell line showed higher binding signals than *Alu* elements unexpressed in the respective cell line.

E. RAMPAGE peaks are significantly enriched near the annotated TSSs of *Alu* elements in K562 (top) and GM12878 (bottom) cells (10,000 permutations were performed).

F. Expressed *Alu* elements uniquely identified by RAMPAGE showed significantly higher enrichment of POLR3A (left) and TFIIC (right) ChIP-seq signals than *Alu* elements uniquely identified by RNA-seq (Conti et al. 2015). Wilcoxon rank-sum test *p*-values are provided. Note that all expressed *Alu* elements are included in these plots regardless whether they overlapped POLR3A or TFIIC peaks, while Fig. 1G only contains the subset of expressed *Alu* elements that did not overlap POLR3A or TFIIC peaks.
