# Supplementary material for: Genome-wide analysis of polymerase III–transcribed Alu elements suggests cell-type–specific enhancer function
Source: PubMed Central journal article supplement — Genome Res. 2019 Sep;29(9):1402–14. doi: 10.1101/gr.249789.119 (PMC6724667; doi:10.1101/gr.249789.119), 2019-09
Supplement: supp_gr.249789.119_Supplemental_Fig_S6.pdf [file supp_gr.249789.119_Supplemental_Fig_S6.pdf]

# Zhang et al., Supplemental Figure S6

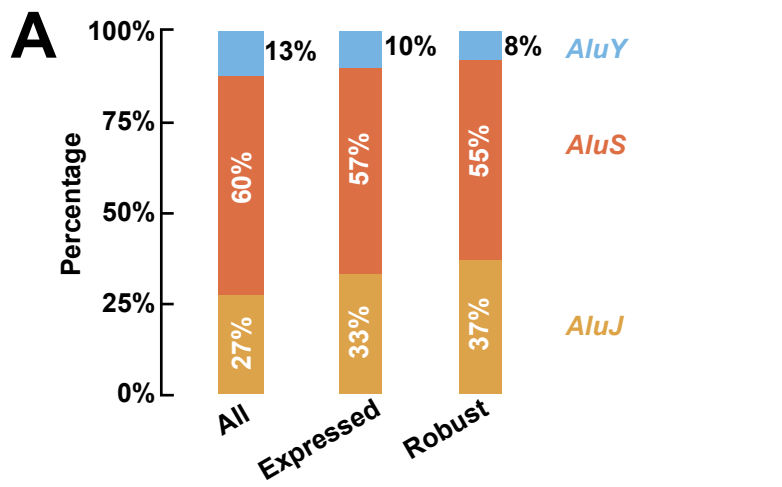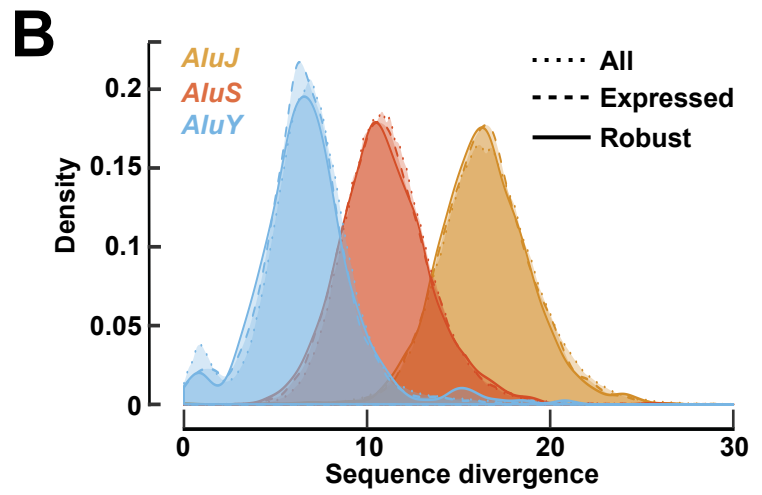

**C**

|             | B4  | B3  | B2  | B1    | B0     |
|-------------|-----|-----|-----|-------|--------|
| <i>AluY</i> | 91  | 43  | 83  | 537   | 616    |
| <i>AluS</i> | 9   | 63  | 75  | 505   | 7,126  |
| <i>AluJ</i> | 3   | 21  | 28  | 218   | 4,545  |
| Total       | 103 | 127 | 186 | 1,260 | 12,287 |

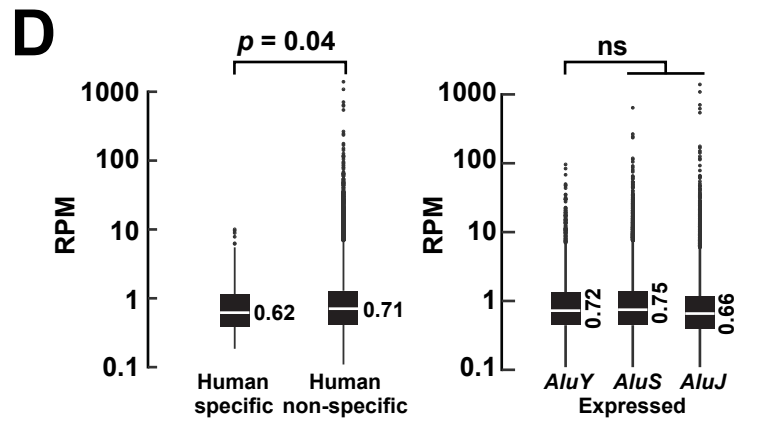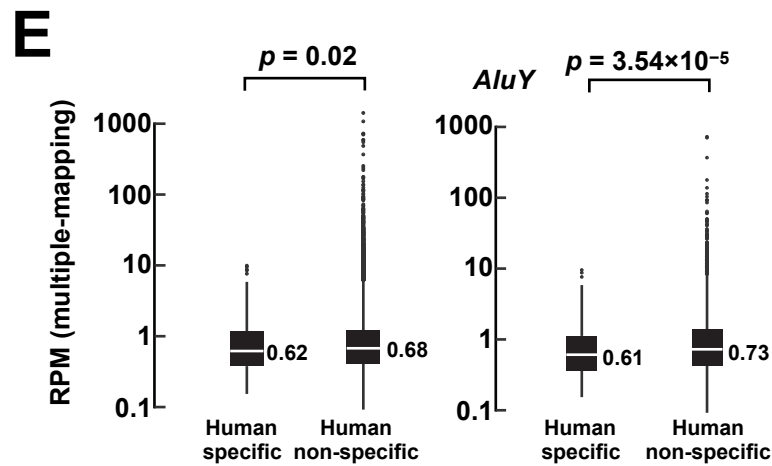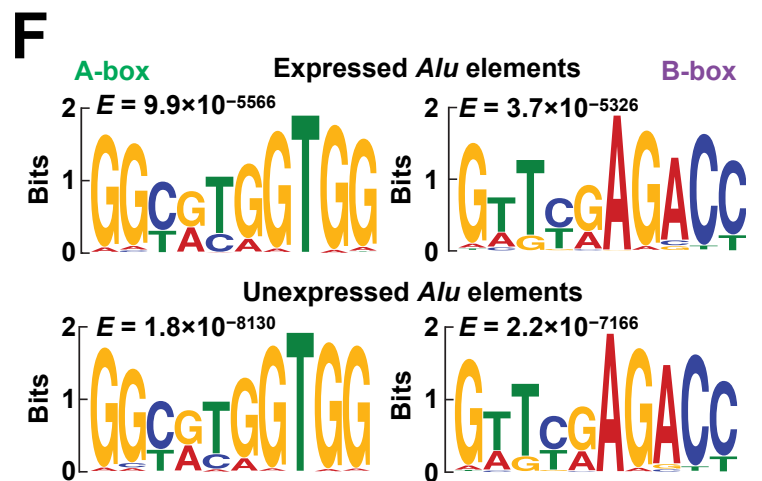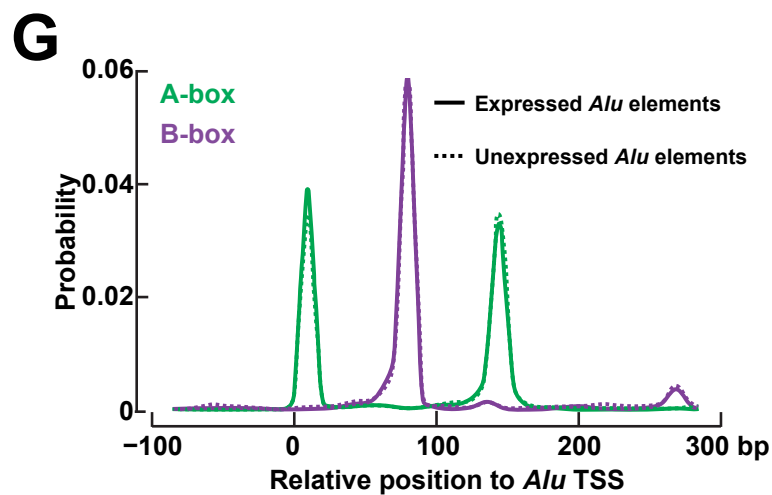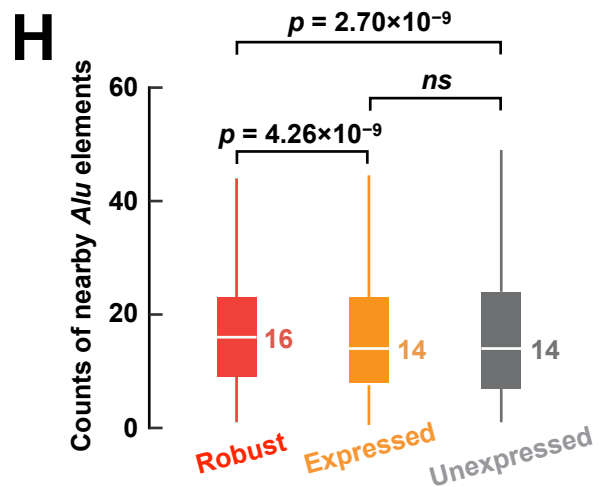

**Supplemental Figure S6. Expressed *Alu* elements exhibit distinct genomic context and sequence features.**

A. Compared with older *Alu* elements (*AluJ* and *AluS*), young *Alu* elements (*AluY*) accounted for a smaller proportion in expressed ( $p\text{-value} = 4.38 \times 10^{-20}$ , Chi-squared test) or robustly expressed ( $p\text{-value} = 3.98 \times 10^{-14}$ ) *Alu* elements.

B. Sequence divergence distributions of all (dotted lines), expressed (dashed lines) and robustly expressed (solid lines) *Alu* elements in each *Alu* subfamily. The three distributions are indistinguishable from one another.

C. Summary of the evolutionary ages (branch) of all expressed *Alu* elements.

D. Human-specific *Alu* elements showed lower expression levels than non-human-specific *Alu* elements (left), and no significant differences were detected between the entire *AluY* and *AluS/J* subfamilies (right). Wilcoxon rank-sum test  $p$ -values are shown.

E. With permitting multiple-mapping reads, human-specific *Alu* elements showed lower expression levels than non-human-specific *Alu* elements (left), and human-specific *AluY* elements showed lower expression levels than non-human-specific *AluY* elements (right). Wilcoxon rank-sum test  $p$ -values are shown.

F. *De novo* motif analysis of the regulatory sequence elements (A-box and B-box) of expressed or unexpressed *Alu* elements.

G. The enrichment in A-box and B-box for expressed *Alu* elements is highly similar to the enrichment for unexpressed *Alu* elements.

H. The number of nearby ( $\leq 10$  kb) *Alu* elements for robustly expressed (red), expressed (orange) or unexpressed (grey) *Alu* elements. Wilcoxon rank-sum test  $p$ -values are shown.
