# Supplementary material for: Genome-wide analysis of polymerase III–transcribed Alu elements suggests cell-type–specific enhancer function
Source: PubMed Central journal article supplement — Genome Res. 2019 Sep;29(9):1402–14. doi: 10.1101/gr.249789.119 (PMC6724667; doi:10.1101/gr.249789.119), 2019-09
Supplement: supp_gr.249789.119_Supplemental_Fig_S10.pdf [file supp_gr.249789.119_Supplemental_Fig_S10.pdf]

**A**

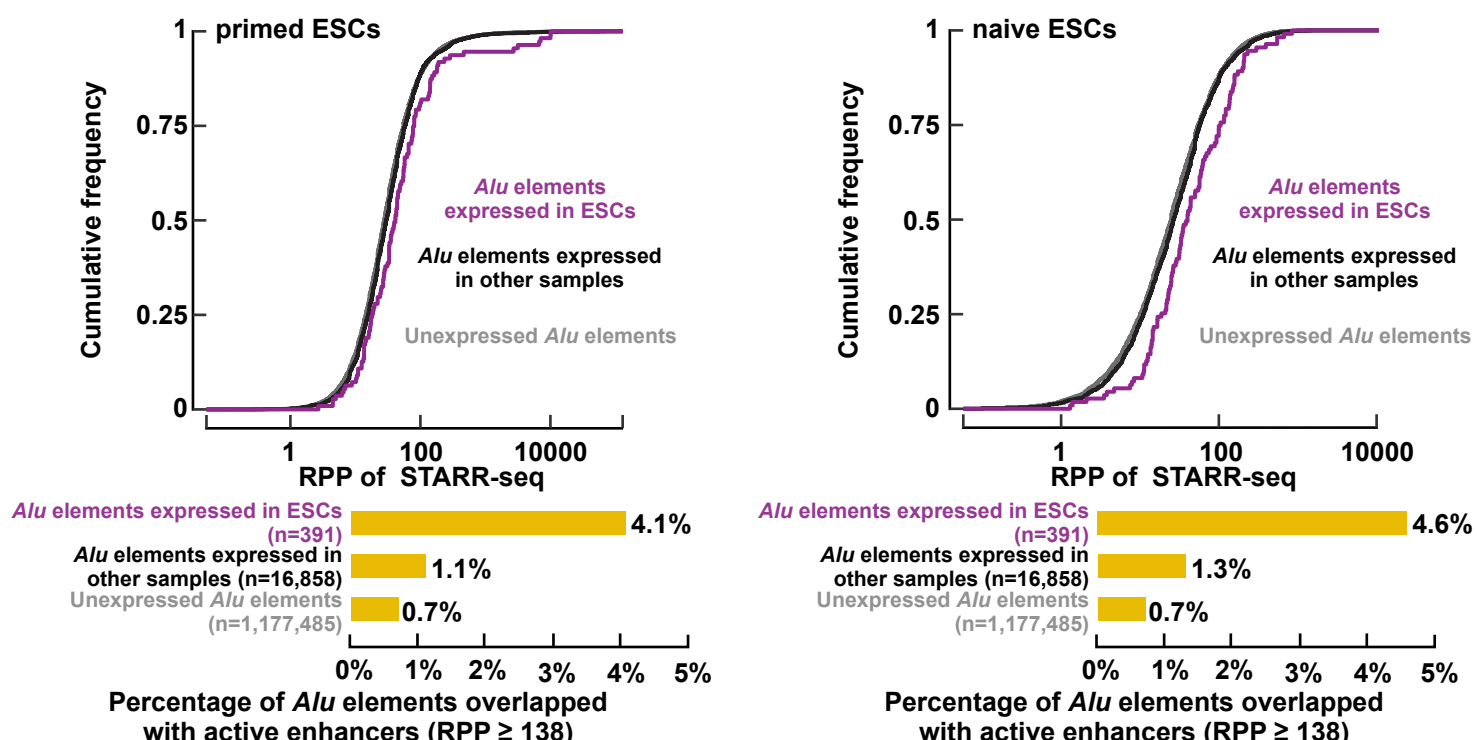

**B**

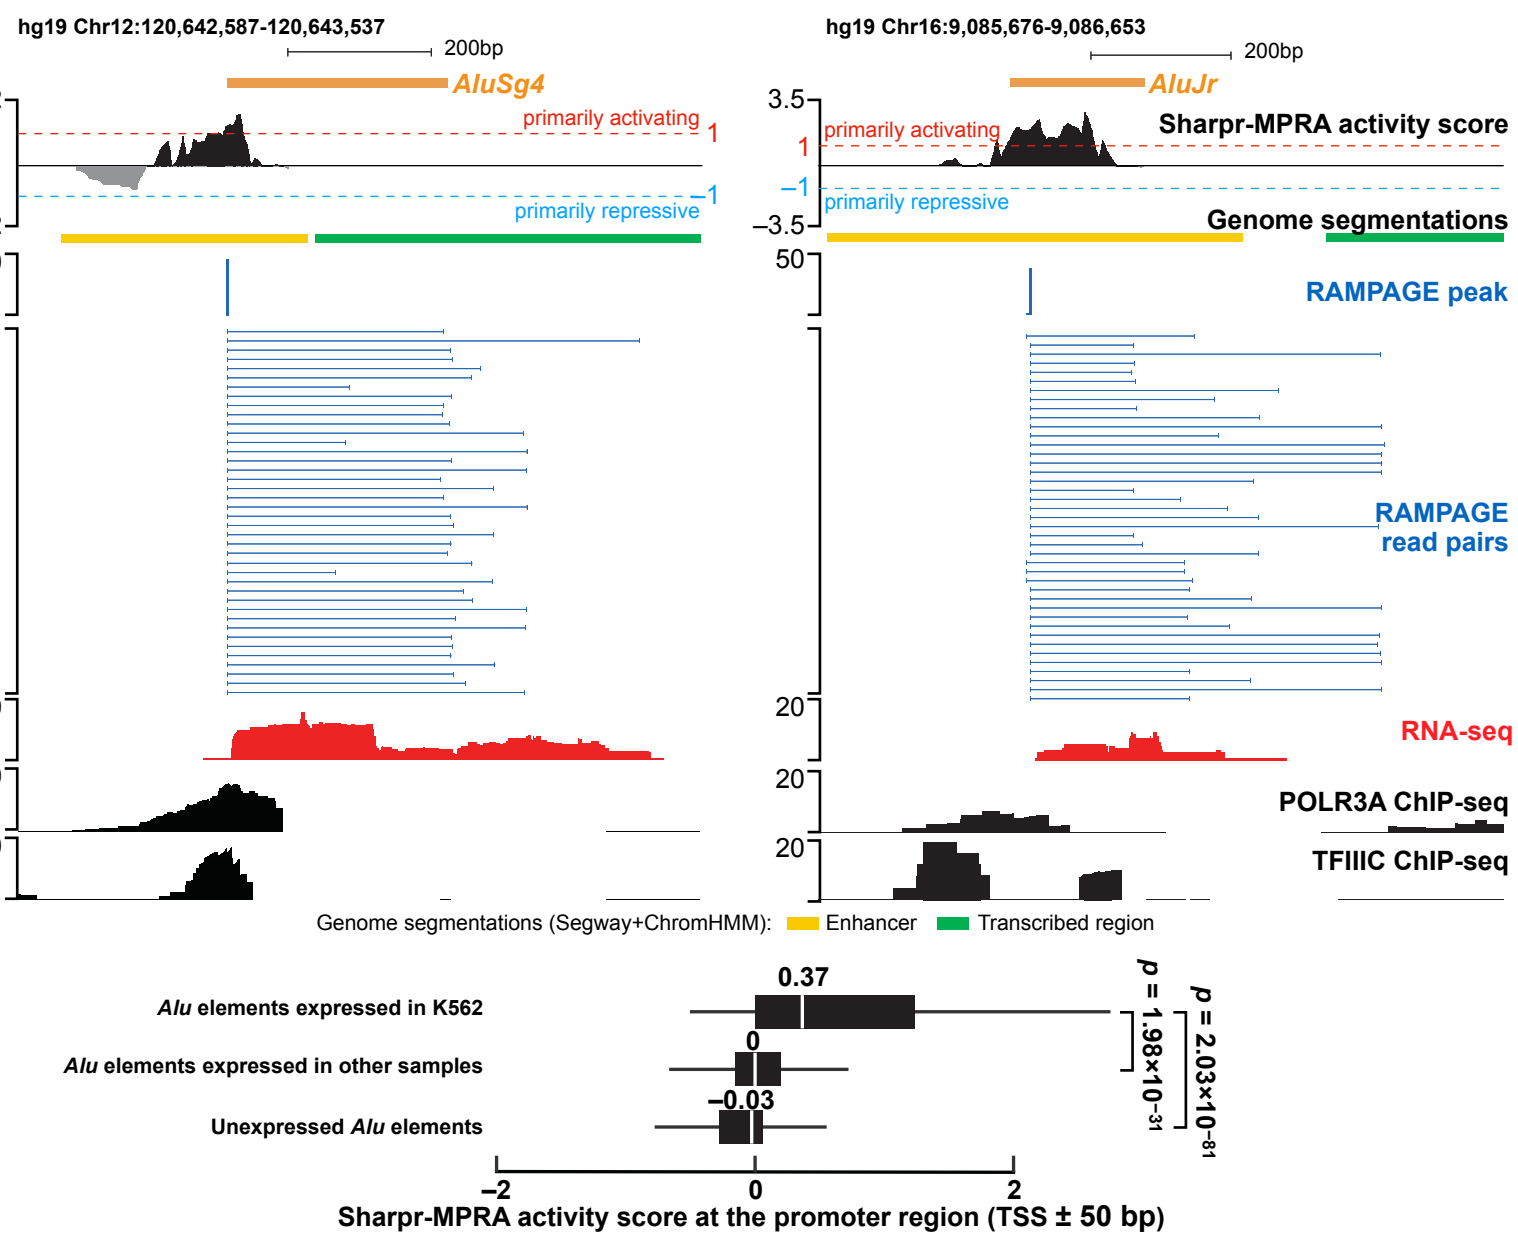

**Supplemental Figure S10. Cell type-specific expressed *Alu* elements exhibit cell type-specific regulatory activity.**

A. *Alu* elements expressed in ESCs showed significantly stronger enhancer activity (top) and enrichment in active enhancers (bottom) than *Alu* elements expressed in other biosamples and unexpressed *Alu* elements, as measured by RPP (reads per plasmid) of STARR-seq in primed (top-left,  $p$ -values  $\leq 2.42 \times 10^{-3}$ , Wilcoxon rank-sum test; bottom-left,  $p$ -values  $\leq 3.00 \times 10^{-7}$ , Chi-squared test) and naive (top-right,  $p$ -values  $\leq 1.19 \times 10^{-4}$ , Wilcoxon rank-sum test; bottom-right,  $p$ -values  $\leq 1.11 \times 10^{-7}$ , Chi-squared test) ESCs (Barakat et al. 2018).

B. Two examples of K562 expressed *Alu* elements with strong activation activity (Sharpr-MPRA activity score  $\geq 1$ ) at their promoter regions (top). *Alu* elements expressed in K562 exhibit significantly stronger Sharpr-MPRA activity score (Ernst et al. 2016) than *Alu* elements expressed in other biosamples and unexpressed *Alu* elements (bottom). Wilcoxon rank-sum test  $p$ -values are shown.
