# Supplementary material for: Genome-wide analysis of polymerase III–transcribed Alu elements suggests cell-type–specific enhancer function
Source: HighWire-hosted journal article supplement (doi:10.1101/gr.249789.119), 2019-08-14
Supplement: Supplemental_Table_S1.xlsx [file Supplemental_Table_S1.xlsx]

## Sheet: Table Legend
Supplemental Table S1. Lists of raw and processed data of RAMPAGE, CAGE, RNA-seq, ChIP-seq, and WGBS used in this study.

## Sheet: RAMPAGE
Sample	ENCODE Experiment ID	Alignment Files
hepatocyte_derived_from_H9	ENCSR985XGK	ENCFF966MMH.bam,ENCFF206UQE.bam
neural_progenitor_cell_derived_from_H9	ENCSR602PHV	ENCFF598QZS.bam,ENCFF823SOF.bam
smooth_muscle_cell_derived_from_H9	ENCSR337VPD	ENCFF011XAY.bam,ENCFF295DXY.bam
mesangial_cell_female_fetal_21_week	ENCSR356VOK	ENCFF675BHK.bam
glomerular_endothelial_cell_female_fetal_22_weeks_and_male_fetal_22_weeks	ENCSR469ZUS	ENCFF239BLE.bam,ENCFF649XDQ.bam
camera_type_eye_female_fetal_24_weeks	ENCSR000AHC	ENCFF129HYO.bam
skeletal_muscle_tissue_female_fetal_19_weeks_and_male_fetal_22_weeks	ENCSR000AGT	ENCFF661JKM.bam,ENCFF863NLJ.bam
heart_female_fetal_19_weeks_and_female_fetal_28_weeks	ENCSR000AGN	ENCFF257LFU.bam,ENCFF399DVW.bam
cerebellum_female_fetal_19_weeks_and_female_fetal_37_weeks	ENCSR000AGK	ENCFF327XAP.bam,ENCFF233QOE.bam
liver_female_fetal_20_weeks_and_male_fetal_22_weeks	ENCSR000AGP	ENCFF578YID.bam,ENCFF534FRD.bam
occipital_lobe_female_fetal_20_weeks_and_male_fetal_22_weeks	ENCSR000AGR	ENCFF520QEV.bam,ENCFF213FTB.bam
metanephros_female_fetal_20_weeks_and_female_fetal_24_weeks	ENCSR000AGO	ENCFF398RCA.bam,ENCFF273SSF.bam
tongue_female_fetal_20_weeks_and_female_fetal_24_weeks	ENCSR000AGZ	ENCFF736LAB.bam,ENCFF846DCF.bam
urinary_bladder_female_fetal_20_weeks_and_female_fetal_24_weeks	ENCSR000AGJ	ENCFF013STD.bam,ENCFF954DMZ.bam
umbilical_cord_male_fetal_20_weeks_and_male_fetal_31_week	ENCSR000AHA	ENCFF303CPI.bam,ENCFF441QCV.bam
pericardium_fibroblast_NONE_and_female_fetal_20_weeks	ENCSR419VNG	ENCFF817JUC.bam,ENCFF011KFS.bam
diencephalon_female_fetal_20_weeks_and_male_fetal_22_weeks	ENCSR000AGL	ENCFF780XMA.bam,ENCFF148QRA.bam
frontal_cortex_female_fetal_20_weeks_and_male_fetal_22_weeks	ENCSR000AGM	ENCFF977DKM.bam,ENCFF502YLG.bam
parietal_lobe_female_fetal_24_weeks_and_male_fetal_22_weeks	ENCSR000AGS	ENCFF100NBE.bam,ENCFF335UTM.bam
kidney_epithelial_cell_male_fetal_22_weeks_and_male_newborn	ENCSR100NLN	ENCFF149KXD.bam,ENCFF269FYN.bam
lung_female_fetal_20_weeks_and_female_fetal_24_weeks	ENCSR000AGQ	ENCFF870SLA.bam,ENCFF378LBC.bam
temporal_lobe_female_fetal_20_weeks_and_female_fetal_24_weeks	ENCSR000AGX	ENCFF419RBS.bam,ENCFF429JHC.bam
skin_of_body_female_fetal_24_weeks_and_male_fetal_22_weeks	ENCSR000AGU	ENCFF009FBS.bam,ENCFF697TFI.bam
spinal_cord_female_fetal_24_weeks_and_male_fetal_22_weeks	ENCSR000AGV	ENCFF605ICF.bam,ENCFF172ODC.bam
uterus_female_fetal_24_weeks_and_female_fetal_28_weeks	ENCSR000AHB	ENCFF229RQY.bam,ENCFF510NJR.bam
thyroid_gland_female_fetal_37_weeks_and_female_fetal_40_weeks	ENCSR000AGY	ENCFF444OGT.bam,ENCFF336HEF.bam
stomach_female_fetal_40_weeks_and_male_fetal_36_weeks	ENCSR000AGW	ENCFF325CEM.bam,ENCFF682EXA.bam
epithelial_cell_of_alveolus_of_lung_NONE_and_female_fetal_21_week	ENCSR376IXU	ENCFF074QPP.bam,ENCFF708YEN.bam
cardiac_atrium_fibroblast_male_child_2_years	ENCSR936TYP	ENCFF188FJA.bam,ENCFF387UYH.bam
SK_N_DZ_nuclear_fraction	ENCSR479BMI	ENCFF976ZWS.bam,ENCFF525OAJ.bam
SK_N_DZ_cytosolic_fraction	ENCSR852KOV	ENCFF601EEC.bam,ENCFF520IDR.bam
SK_N_DZ_treated_with_dimethyl_sulfoxide	ENCSR786DTS	ENCFF953CVF.bam,ENCFF035WAJ.bam
Daoy	ENCSR700NMZ	ENCFF049HVC.bam,ENCFF775ETA.bam
SJCRH30	ENCSR540YVD	ENCFF338WBH.bam,ENCFF748KNG.bam
RPMI_7951	ENCSR104PJD	ENCFF910YSK.bam,ENCFF839XOD.bam
SJSA1	ENCSR108KHH	ENCFF925NYB.bam,ENCFF479HYG.bam
SK_MEL_5	ENCSR054RIR	ENCFF302YNV.bam,ENCFF561RBE.bam
SK_MEL_5_nuclear_fraction	ENCSR506WDZ	ENCFF368FEH.bam,ENCFF946XRM.bam
SK_MEL_5_cytosolic_fraction	ENCSR007RIV	ENCFF969FMF.bam,ENCFF867HEW.bam
mammary_microvascular_endothelial_cell_female_adult_26_years	ENCSR663WYF	ENCFF820BXB.bam,ENCFF788HWA.bam
liver_male_adult_32_years	ENCSR285LDX	ENCFF958BGS.bam
M059J	ENCSR507GYW	ENCFF485CDE.bam,ENCFF508XYI.bam
endometrial_microvascular_endothelial_cells_female_adult_34_years	ENCSR171YRA	ENCFF130SYN.bam,ENCFF540NCT.bam
heart_male_adult_34_years	ENCSR724SZY	ENCFF538QUA.bam
myometrial_cell_female_adult_34_years	ENCSR290RXI	ENCFF757RGD.bam,ENCFF988JHY.bam
HT1080_cytosolic_fraction	ENCSR022PAU	ENCFF533JOE.bam,ENCFF916OFD.bam
HT1080	ENCSR348DYP	ENCFF809RTW.bam
HT1080_nuclear_fraction	ENCSR352ANU	ENCFF604EKH.bam,ENCFF629BBI.bam
adrenal_gland_male_adult_37_years	ENCSR880BIV	ENCFF382SWG.bam,ENCFF079EIW.bam
esophagus_muscularis_mucosa_male_adult_37_years	ENCSR883KJV	ENCFF202KRG.bam
esophagus_squamous_epithelium_male_adult_37_years	ENCSR161GPD	ENCFF758LUP.bam
gastrocnemius_medialis_male_adult_37_years	ENCSR458JVO	ENCFF308AMJ.bam,ENCFF216FQP.bam
gastroesophageal_sphincter_male_adult_37_years	ENCSR590VCR	ENCFF742BIE.bam
H4	ENCSR850NOP	ENCFF149CJI.bam
NCI_H460	ENCSR093UPQ	ENCFF734XYM.bam,ENCFF831HLD.bam
NCI_H460_nuclear_fraction	ENCSR239ZQA	ENCFF077FRQ.bam,ENCFF458VJM.bam
NCI_H460_cytosolic_fraction	ENCSR824YLV	ENCFF859IXM.bam,ENCFF954AED.bam
omental_fat_pad_male_adult_37_years	ENCSR176WZV	ENCFF318FLG.bam
Peyers_patch_male_adult_37_years	ENCSR713KWE	ENCFF641MWV.bam
prostate_gland_male_adult_37_years	ENCSR655HUL	ENCFF221UZQ.bam
sigmoid_colon_male_adult_37_years	ENCSR698NAQ	ENCFF955DLW.bam
spleen_male_adult_37_years	ENCSR329YVA	ENCFF437QEL.bam
stomach_male_adult_37_years	ENCSR792XFE	ENCFF923RRT.bam
subcutaneous_adipose_tissue_male_adult_37_years	ENCSR053ZMS	ENCFF995IKY.bam
suprapubic_skin_male_adult_37_years	ENCSR501EGS	ENCFF705PEG.bam
testis_male_adult_37_years	ENCSR841EQJ	ENCFF920DYJ.bam
thoracic_aorta_male_adult_37_years	ENCSR632GYF	ENCFF092PAW.bam,ENCFF750OYA.bam
thyroid_gland_male_adult_37_years	ENCSR260RBO	ENCFF722QMG.bam,ENCFF505FIO.bam
tibial_nerve_male_adult_37_years	ENCSR722NWC	ENCFF728WLI.bam
transverse_colon_male_adult_37_years	ENCSR688YRV	ENCFF969FTV.bam
upper_lobe_of_left_lung_male_adult_37_years	ENCSR738HKC	ENCFF461QKV.bam
LHCN_M2	ENCSR002MPN	ENCFF820UMN.bam
HT_29	ENCSR295GUQ	ENCFF677LQZ.bam,ENCFF912INA.bam
OCI_LY7	ENCSR855LXJ	ENCFF620AEZ.bam,ENCFF547EQI.bam
adrenal_gland_female_adult_51_year	ENCSR743LXD	ENCFF133WTB.bam
body_of_pancreas_female_adult_51_year	ENCSR918MVG	ENCFF140OQK.bam
breast_epithelium_female_adult_51_year	ENCSR598TAK	ENCFF273DXH.bam
esophagus_muscularis_mucosa_female_adult_51_year	ENCSR679TCM	ENCFF532XAA.bam
esophagus_squamous_epithelium_female_adult_51_year	ENCSR201ARN	ENCFF960KDV.bam
gastrocnemius_medialis_female_adult_51_year	ENCSR024MNP	ENCFF140ZKR.bam
gastroesophageal_sphincter_female_adult_51_year	ENCSR779OWH	ENCFF692JEH.bam
heart_left_ventricle_female_adult_51_year	ENCSR226BLJ	ENCFF021DYD.bam
lower_leg_skin_female_adult_51_year	ENCSR030CKH	ENCFF663FUW.bam
omental_fat_pad_female_adult_51_year	ENCSR611YXR	ENCFF008LVY.bam
ovary_female_adult_51_year	ENCSR601URL	ENCFF380NUJ.bam
Peyers_patch_female_adult_51_year	ENCSR514XCC	ENCFF527JDH.bam
right_atrium_auricular_region_female_adult_51_year	ENCSR554TZR	ENCFF291KKZ.bam
sigmoid_colon_female_adult_51_year	ENCSR035MAJ	ENCFF229JZE.bam
spleen_female_adult_51_year	ENCSR887SSW	ENCFF934YEA.bam
stomach_female_adult_51_year	ENCSR497BYB	ENCFF680KCF.bam
subcutaneous_adipose_tissue_female_adult_51_year	ENCSR785OGK	ENCFF087ZFK.bam
suprapubic_skin_female_adult_51_year	ENCSR026WQO	ENCFF401XML.bam
thyroid_gland_female_adult_51_year	ENCSR477JQM	ENCFF216ZJV.bam
tibial_nerve_female_adult_51_year	ENCSR848OYH	ENCFF694WJX.bam
transverse_colon_female_adult_51_year	ENCSR297QGC	ENCFF956EVA.bam
upper_lobe_of_left_lung_female_adult_51_year	ENCSR099FOD	ENCFF847RGV.bam
A172	ENCSR208AWA	ENCFF282UCK.bam,ENCFF440IDF.bam
adrenal_gland_female_adult_53_years	ENCSR930XIH	ENCFF992WOR.bam
body_of_pancreas_female_adult_53_years	ENCSR366BLN	ENCFF115QQK.bam
breast_epithelium_female_adult_53_years	ENCSR909QWB	ENCFF490JHQ.bam
esophagus_muscularis_mucosa_female_adult_53_years	ENCSR669JBL	ENCFF446SVW.bam
esophagus_squamous_epithelium_female_adult_53_years	ENCSR930RDW	ENCFF651BEF.bam
fibroblast_of_arm_male_adult_53_years	ENCSR949PHV	ENCFF461RRE.bam,ENCFF640ITJ.bam
gastrocnemius_medialis_female_adult_53_years	ENCSR710LGT	ENCFF574DNK.bam
gastroesophageal_sphincter_female_adult_53_years	ENCSR028GEI	ENCFF081HWO.bam
heart_left_ventricle_female_adult_53_years	ENCSR464UVO	ENCFF528YUV.bam
induced_pluripotent_stem_cell_male_adult_53_years_derived_from_fibroblast_of_arm	ENCSR410OSB	ENCFF144DCV.bam,ENCFF829ZRK.bam
K562	ENCSR000AER	ENCFF901TNM.bam,ENCFF210WWT.bam
lower_leg_skin_female_adult_53_years	ENCSR251EJL	ENCFF313NMC.bam
omental_fat_pad_female_adult_53_years	ENCSR472PZH	ENCFF047SGW.bam
ovary_female_adult_53_years	ENCSR983ICQ	ENCFF786QQU.bam
Peyers_patch_female_adult_53_years	ENCSR199XGY	ENCFF335YTG.bam
right_atrium_auricular_region_female_adult_53_years	ENCSR877SCS	ENCFF293RVR.bam
right_lobe_of_liver_female_adult_53_years	ENCSR941SAZ	ENCFF908WPV.bam
right_lobe_of_liver_female_adult_53_years	ENCSR543DIO	ENCFF393RVG.bam
sigmoid_colon_female_adult_53_years	ENCSR321NPB	ENCFF152YIW.bam
spleen_female_adult_53_years	ENCSR236PTD	ENCFF069MPA.bam
stomach_female_adult_53_years	ENCSR686VRS	ENCFF935TYW.bam
subcutaneous_adipose_tissue_female_adult_53_years	ENCSR419MZM	ENCFF713RVY.bam
suprapubic_skin_female_adult_53_years	ENCSR480WCN	ENCFF904XKN.bam
thyroid_gland_female_adult_53_years	ENCSR700YLA	ENCFF805JGI.bam
tibial_nerve_female_adult_53_years	ENCSR706VZW	ENCFF554MWI.bam
transverse_colon_female_adult_53_years	ENCSR855GRG	ENCFF823ZPD.bam
upper_lobe_of_left_lung_female_adult_53_years	ENCSR790PBX	ENCFF519ZJT.bam
uterus_female_adult_53_years	ENCSR502DKA	ENCFF986FUH.bam
vagina_female_adult_53_years	ENCSR219EAT	ENCFF399WHU.bam
A375	ENCSR080XAB	ENCFF769HVM.bam,ENCFF213LTA.bam
adrenal_gland_male_adult_54_years	ENCSR970OWZ	ENCFF654JSY.bam,ENCFF327NNG.bam
esophagus_muscularis_mucosa_male_adult_54_years	ENCSR454ZQB	ENCFF494ZCU.bam
esophagus_squamous_epithelium_male_adult_54_years	ENCSR102OEK	ENCFF749FRU.bam
gastroesophageal_sphincter_male_adult_54_years	ENCSR315BZA	ENCFF571BWW.bam
omental_fat_pad_male_adult_54_years	ENCSR544IYF	ENCFF448AAW.bam
Peyers_patch_male_adult_54_years	ENCSR954YVZ	ENCFF265APK.bam
prostate_gland_male_adult_54_years	ENCSR671RMD	ENCFF072XKW.bam
sigmoid_colon_male_adult_54_years	ENCSR833XGD	ENCFF560NBY.bam
spleen_male_adult_54_years	ENCSR627SPU	ENCFF692FXQ.bam
stomach_male_adult_54_years	ENCSR081NTK	ENCFF040XCU.bam
suprapubic_skin_male_adult_54_years	ENCSR616JRI	ENCFF971HTD.bam
testis_male_adult_54_years	ENCSR866SRG	ENCFF352NIV.bam
thyroid_gland_male_adult_54_years	ENCSR069LRO	ENCFF101HYP.bam,ENCFF849ACY.bam
transverse_colon_male_adult_54_years	ENCSR649WDK	ENCFF765MQO.bam
upper_lobe_of_left_lung_male_adult_54_years	ENCSR004UBM	ENCFF462GCN.bam
hair_follicular_keratinocyte_male_adult_55_years	ENCSR166TEB	ENCFF101SOF.bam,ENCFF969YIB.bam
PC_3	ENCSR585QYX	ENCFF234BBJ.bam,ENCFF745YHA.bam
Karpas_422	ENCSR836WAX	ENCFF767OPK.bam,ENCFF070PAW.bam
cardiac_ventricle_fibroblast_NONE_and_male_adult_18_years	ENCSR177YJM	ENCFF039VPP.bam,ENCFF469SOE.bam
airway_epithelial_cell	ENCSR582BUX	ENCFF721ZAU.bam,ENCFF272NAF.bam
bronchus_fibroblast_of_lung	ENCSR540CRO	ENCFF751PBR.bam,ENCFF974VGG.bam
cardiac_muscle_cell	ENCSR613JNT	ENCFF697TAS.bam,ENCFF134TMH.bam
epithelial_cell_of_proximal_tubule	ENCSR861MQP	ENCFF568EIH.bam,ENCFF994ERC.bam
GM12878	ENCSR000AEI	ENCFF180ZRG.bam,ENCFF242MAP.bam
H7_hESC	ENCSR022VBF	ENCFF672BSS.bam
myotube	ENCSR187NWZ	ENCFF932BIA.bam
neural_cell	ENCSR612EAO	ENCFF315FXG.bam,ENCFF702ENR.bam
skeletal_muscle_myoblast	ENCSR765LMM	ENCFF422LHB.bam,ENCFF773FSU.bam

## Sheet: CAGE
Sample	FANTOM ID	URL
K562	10824-111C5	http://fantom.gsc.riken.jp/5/sstar/FF:10824-111C5
K562	10825-111C6	http://fantom.gsc.riken.jp/5/sstar/FF:10825-111C6
K562	10826-111C7	http://fantom.gsc.riken.jp/5/sstar/FF:10826-111C7
GM12878	10821-111C2	http://fantom.gsc.riken.jp/5/sstar/FF:10821-111C2
GM12878	10822-111C3	http://fantom.gsc.riken.jp/5/sstar/FF:10822-111C3
GM12878	10823-111C4	http://fantom.gsc.riken.jp/5/sstar/FF:10823-111C4

## Sheet: RNA-seq
Sample	Type of RNA-seq	ENCODE Experiment ID	Alignment File	Gene Expression File
GM12878	total_RNA-seq	ENCSR000AEC	ENCFF704PEK.bam	ENCFF088ZKJ.tsv
K562	total_RNA-seq	ENCSR000AEL	ENCFF584WML.bam	ENCFF902SEE.tsv
urinary_bladder_female_fetal_20_weeks_and_female_fetal_24_weeks	total_RNA-seq	ENCSR000AEV	ENCFF291ZCV.bam	ENCFF413RGP.tsv
cerebellum_female_fetal_19_weeks_and_female_fetal_37_weeks	total_RNA-seq	ENCSR000AEW	ENCFF602BYA.bam	ENCFF817YTS.tsv
diencephalon_female_fetal_20_weeks_and_male_fetal_22_weeks	total_RNA-seq	ENCSR000AEX	ENCFF677URC.bam	ENCFF164GTC.tsv
frontal_cortex_female_fetal_20_weeks_and_male_fetal_22_weeks	total_RNA-seq	ENCSR000AEY	ENCFF803AAV.bam	ENCFF520PXU.tsv
heart_female_fetal_19_weeks_and_female_fetal_28_weeks	total_RNA-seq	ENCSR000AEZ	ENCFF174EGJ.bam	ENCFF726GGW.tsv
metanephros_female_fetal_20_weeks_and_female_fetal_24_weeks	total_RNA-seq	ENCSR000AFA	ENCFF663TRQ.bam	ENCFF309XJY.tsv
liver_female_fetal_20_weeks_and_male_fetal_22_weeks	total_RNA-seq	ENCSR000AFB	ENCFF228GPD.bam	ENCFF029IUF.tsv
lung_female_fetal_20_weeks_and_female_fetal_24_weeks	total_RNA-seq	ENCSR000AFC	ENCFF446BDL.bam	ENCFF268ADF.tsv
occipital_lobe_female_fetal_20_weeks_and_male_fetal_22_weeks	total_RNA-seq	ENCSR000AFD	ENCFF397QLJ.bam	ENCFF927TYW.tsv
parietal_lobe_female_fetal_24_weeks_and_male_fetal_22_weeks	total_RNA-seq	ENCSR000AFE	ENCFF243QVH.bam	ENCFF067OFR.tsv
skeletal_muscle_tissue_female_fetal_19_weeks_and_male_fetal_22_weeks	total_RNA-seq	ENCSR000AFF	ENCFF009MKH.bam	ENCFF907CXN.tsv
skin_of_body_female_fetal_24_weeks_and_male_fetal_22_weeks	total_RNA-seq	ENCSR000AFG	ENCFF651WWV.bam	ENCFF274EWD.tsv
spinal_cord_female_fetal_24_weeks_and_male_fetal_22_weeks	total_RNA-seq	ENCSR000AFH	ENCFF883LFF.bam	ENCFF359PMJ.tsv
stomach_female_fetal_40_weeks_and_male_fetal_36_weeks	total_RNA-seq	ENCSR000AFI	ENCFF646CCF.bam	ENCFF621GTC.tsv
temporal_lobe_female_fetal_20_weeks_and_female_fetal_24_weeks	total_RNA-seq	ENCSR000AFJ	ENCFF286ZEF.bam	ENCFF011IOJ.tsv
thyroid_gland_female_fetal_37_weeks_and_female_fetal_40_weeks	total_RNA-seq	ENCSR000AFK	ENCFF145GYN.bam	ENCFF690LJG.tsv
tongue_female_fetal_20_weeks_and_female_fetal_24_weeks	total_RNA-seq	ENCSR000AFL	ENCFF850JYN.bam	ENCFF690BUS.tsv
umbilical_cord_male_fetal_20_weeks_and_male_fetal_31_week	total_RNA-seq	ENCSR000AFM	ENCFF796MMH.bam	ENCFF418HER.tsv
uterus_female_fetal_24_weeks_and_female_fetal_28_weeks	total_RNA-seq	ENCSR000AFN	ENCFF984YOJ.bam	ENCFF224DUX.tsv
camera_type_eye_female_fetal_24_weeks	total_RNA-seq	ENCSR000AFO	ENCFF883SDA.bam	ENCFF766GYI.tsv
LHCN_M2	total_RNA-seq	ENCSR332DBS	ENCFF658SRY.bam	ENCFF565OHH.tsv
upper_lobe_of_left_lung_male_adult_54_years	total_RNA-seq	ENCSR839ZDH	ENCFF174OEM.bam	ENCFF249QYL.tsv
SK_MEL_5_cytosolic_fraction	polyA_RNA-seq	ENCSR291DJH	ENCFF882COT.bam	ENCFF370KUU.tsv
HT1080_cytosolic_fraction	polyA_RNA-seq	ENCSR166QLP	ENCFF166HWB.bam	ENCFF426EAU.tsv
H7_hESC	total_RNA-seq	ENCSR490SQH	ENCFF380FFO.bam	ENCFF767WGV.tsv
gastrocnemius_medialis_female_adult_51_year	total_RNA-seq	ENCSR609NZM	ENCFF569TCU.bam	ENCFF342MON.tsv
suprapubic_skin_female_adult_51_year	total_RNA-seq	ENCSR480SLD	ENCFF092NPN.bam	ENCFF198AWI.tsv
gastroesophageal_sphincter_female_adult_53_years	total_RNA-seq	ENCSR740YMS	ENCFF791QVS.bam	ENCFF749AJA.tsv
lower_leg_skin_female_adult_51_year	total_RNA-seq	ENCSR551NII	ENCFF484MHO.bam	ENCFF549LHP.tsv
sigmoid_colon_female_adult_51_year	total_RNA-seq	ENCSR827IXS	ENCFF166SLI.bam	ENCFF192TOO.tsv
subcutaneous_adipose_tissue_male_adult_37_years	total_RNA-seq	ENCSR708VVE	ENCFF230OBA.bam	ENCFF252BIR.tsv
SK_MEL_5	total_RNA-seq	ENCSR669KQU	ENCFF763BIE.bam	ENCFF346UQA.tsv
thyroid_gland_male_adult_54_years	total_RNA-seq	ENCSR023ZXN	ENCFF243SMM.bam	ENCFF173PFO.tsv
A375	total_RNA-seq	ENCSR504VXC	ENCFF657KMT.bam	ENCFF468DGL.tsv
stomach_male_adult_54_years	total_RNA-seq	ENCSR296PMS	ENCFF672GPS.bam	ENCFF930JZC.tsv
NCI_H460	total_RNA-seq	ENCSR164OCT	ENCFF009YDK.bam	ENCFF361TGG.tsv
upper_lobe_of_left_lung_female_adult_51_year	total_RNA-seq	ENCSR425RGZ	ENCFF967XNR.bam	ENCFF841RGX.tsv
kidney_epithelial_cell_male_fetal_22_weeks_and_male_newborn	total_RNA-seq	ENCSR373BDG	ENCFF756PUW.bam	ENCFF340QKB.tsv
esophagus_squamous_epithelium_male_adult_54_years	total_RNA-seq	ENCSR474TRG	ENCFF563MMP.bam	ENCFF778AHO.tsv
RPMI_7951	total_RNA-seq	ENCSR320BRR	ENCFF762PQW.bam	ENCFF714RNK.tsv
SJSA1	total_RNA-seq	ENCSR880EGO	ENCFF935HDZ.bam	ENCFF435GRI.tsv
esophagus_squamous_epithelium_male_adult_37_years	total_RNA-seq	ENCSR354QPN	ENCFF140PAJ.bam	ENCFF301YAH.tsv
hair_follicular_keratinocyte_male_adult_55_years	total_RNA-seq	ENCSR680USE	ENCFF522PVE.bam	ENCFF798LDD.tsv
endometrial_microvascular_endothelial_cells_female_adult_34_years	total_RNA-seq	ENCSR919MZM	ENCFF589RKS.bam	ENCFF416NCQ.tsv
omental_fat_pad_male_adult_37_years	total_RNA-seq	ENCSR729CAZ	ENCFF601XTY.bam	ENCFF099XRG.tsv
cardiac_ventricle_fibroblast_NONE_and_male_adult_18_years	total_RNA-seq	ENCSR369RVN	ENCFF870DER.bam	ENCFF175OKW.tsv
myotube	total_RNA-seq	ENCSR828TEI	ENCFF540OPT.bam	ENCFF693OTH.tsv
Peyers_patch_female_adult_53_years	total_RNA-seq	ENCSR544SAU	ENCFF158VOW.bam	ENCFF715EVL.tsv
esophagus_squamous_epithelium_female_adult_51_year	total_RNA-seq	ENCSR510MIA	ENCFF915GMK.bam	ENCFF560ZBX.tsv
A172	total_RNA-seq	ENCSR580GSX	ENCFF925UAL.bam	ENCFF432WWV.tsv
vagina_female_adult_53_years	total_RNA-seq	ENCSR146LBD	ENCFF334PGF.bam	ENCFF855LJY.tsv
heart_left_ventricle_female_adult_51_year	total_RNA-seq	ENCSR436QDU	ENCFF314MIN.bam	ENCFF870BQB.tsv
spleen_female_adult_53_years	total_RNA-seq	ENCSR900SGE	ENCFF075XDT.bam	ENCFF354TGX.tsv
NCI_H460_nuclear_fraction	polyA_RNA-seq	ENCSR625QJI	ENCFF418YBM.bam	ENCFF667WSC.tsv
lower_leg_skin_female_adult_53_years	total_RNA-seq	ENCSR991HIR	ENCFF793GRR.bam	ENCFF153NMV.tsv
thyroid_gland_male_adult_37_years	total_RNA-seq	ENCSR532LJV	ENCFF174CHS.bam	ENCFF194VCC.tsv
liver_male_adult_32_years	total_RNA-seq	ENCSR000AEU	ENCFF330PDH.bam	ENCFF965IQH.tsv
myometrial_cell_female_adult_34_years	total_RNA-seq	ENCSR371VGV	ENCFF324FFR.bam	ENCFF229QGJ.tsv
HT_29	total_RNA-seq	ENCSR971GPJ	ENCFF353WRV.bam	ENCFF220TCD.tsv
transverse_colon_female_adult_51_year	total_RNA-seq	ENCSR403SZN	ENCFF768AVM.bam	ENCFF874CRV.tsv
gastroesophageal_sphincter_male_adult_54_years	total_RNA-seq	ENCSR485WBR	ENCFF382DOB.bam	ENCFF177QWM.tsv
sigmoid_colon_female_adult_53_years	total_RNA-seq	ENCSR094GVZ	ENCFF840EPA.bam	ENCFF179AVF.tsv
spleen_male_adult_37_years	total_RNA-seq	ENCSR330UMQ	ENCFF177RBE.bam	ENCFF753CHW.tsv
smooth_muscle_cell_derived_from_H9	total_RNA-seq	ENCSR052FJA	ENCFF284ENS.bam	ENCFF526VZV.tsv
HT1080	total_RNA-seq	ENCSR535VTR	ENCFF906GBB.bam	ENCFF469UTN.tsv
HT1080_nuclear_fraction	polyA_RNA-seq	ENCSR067UNX	ENCFF176HWN.bam	ENCFF965MCV.tsv
mesangial_cell_female_fetal_21_week	total_RNA-seq	ENCSR198TKA	ENCFF303KVG.bam	ENCFF805BVE.tsv
body_of_pancreas_female_adult_53_years	total_RNA-seq	ENCSR586SYA	ENCFF711VBS.bam	ENCFF204BZU.tsv
epithelial_cell_of_alveolus_of_lung_NONE_and_female_fetal_21_week	total_RNA-seq	ENCSR897KTO	ENCFF054FEC.bam	ENCFF096DQV.tsv
induced_pluripotent_stem_cell_male_adult_53_years_derived_from_fibroblast_of_arm	total_RNA-seq	ENCSR938LSP	ENCFF449EYU.bam	ENCFF455KDZ.tsv
subcutaneous_adipose_tissue_female_adult_53_years	total_RNA-seq	ENCSR504NIU	ENCFF288CRS.bam	ENCFF967YNU.tsv
pericardium_fibroblast_NONE_and_female_fetal_20_weeks	total_RNA-seq	ENCSR362HMX	ENCFF169XKW.bam	ENCFF896RUC.tsv
esophagus_muscularis_mucosa_male_adult_54_years	total_RNA-seq	ENCSR750ETS	ENCFF926CVG.bam	ENCFF650KLZ.tsv
gastrocnemius_medialis_male_adult_37_years	total_RNA-seq	ENCSR853BNH	ENCFF308RYZ.bam	ENCFF092VEZ.tsv
heart_left_ventricle_female_adult_53_years	total_RNA-seq	ENCSR391VGU	ENCFF231YMH.bam	ENCFF470AAE.tsv
glomerular_endothelial_cell_female_fetal_22_weeks_and_male_fetal_22_weeks	total_RNA-seq	ENCSR878EUT	ENCFF332WWR.bam	ENCFF147HDX.tsv
omental_fat_pad_female_adult_53_years	total_RNA-seq	ENCSR645TCG	ENCFF894IDV.bam	ENCFF324LPM.tsv
thyroid_gland_female_adult_51_year	total_RNA-seq	ENCSR687HJY	ENCFF735AHR.bam	ENCFF509HKT.tsv
SK_N_DZ_nuclear_fraction	polyA_RNA-seq	ENCSR255NYQ	ENCFF255OPB.bam	ENCFF571DWF.tsv
suprapubic_skin_female_adult_53_years	total_RNA-seq	ENCSR450ENK	ENCFF624VBI.bam	ENCFF978MFN.tsv
stomach_female_adult_51_year	total_RNA-seq	ENCSR853WOM	ENCFF026CWS.bam	ENCFF155AGD.tsv
suprapubic_skin_male_adult_37_years	total_RNA-seq	ENCSR862RGX	ENCFF789OJW.bam	ENCFF132TMQ.tsv
uterus_female_adult_53_years	total_RNA-seq	ENCSR113HQM	ENCFF340ECJ.bam	ENCFF624VKT.tsv
SK_MEL_5_nuclear_fraction	polyA_RNA-seq	ENCSR201WVA	ENCFF999MXE.bam	ENCFF677ITS.tsv
M059J	total_RNA-seq	ENCSR696SMK	ENCFF358EBO.bam	ENCFF519YPL.tsv
Peyers_patch_female_adult_51_year	total_RNA-seq	ENCSR450BNZ	ENCFF713ODL.bam	ENCFF288DJR.tsv
bronchus_fibroblast_of_lung	total_RNA-seq	ENCSR620NSN	ENCFF606BYK.bam	ENCFF762CTR.tsv
SJCRH30	total_RNA-seq	ENCSR568YRP	ENCFF210HQV.bam	ENCFF896LUK.tsv
right_lobe_of_liver_female_adult_53_years	total_RNA-seq	ENCSR504QMK	ENCFF648XNS.bam	ENCFF280YNO.tsv
right_lobe_of_liver_female_adult_53_years	total_RNA-seq	ENCSR226KML	ENCFF274IYL.bam	ENCFF347TXW.tsv
omental_fat_pad_male_adult_54_years	total_RNA-seq	ENCSR080HPT	ENCFF258CSJ.bam	ENCFF650UII.tsv
right_atrium_auricular_region_female_adult_51_year	total_RNA-seq	ENCSR457ENP	ENCFF161RBK.bam	ENCFF406YAV.tsv
airway_epithelial_cell	total_RNA-seq	ENCSR822SUG	ENCFF841RJE.bam	ENCFF556AGI.tsv
PC_3	total_RNA-seq	ENCSR420NLC	ENCFF296DNL.bam	ENCFF182UOI.tsv
gastroesophageal_sphincter_male_adult_37_years	total_RNA-seq	ENCSR528ZKN	ENCFF951OCI.bam	ENCFF646VVU.tsv
breast_epithelium_female_adult_51_year	total_RNA-seq	ENCSR438YPF	ENCFF622QTY.bam	ENCFF557XAK.tsv
ovary_female_adult_51_year	total_RNA-seq	ENCSR042GYH	ENCFF825PBI.bam	ENCFF957VSL.tsv
neural_progenitor_cell_derived_from_H9	total_RNA-seq	ENCSR244ISQ	ENCFF513ZSE.bam	ENCFF043UOR.tsv
omental_fat_pad_female_adult_51_year	total_RNA-seq	ENCSR158KFO	ENCFF486UWP.bam	ENCFF766ECG.tsv
neural_cell	polyA_depleted_RNA-seq	ENCSR995JXE	ENCFF025MNJ.bam	ENCFF384IRC.tsv
cardiac_muscle_cell	total_RNA-seq	ENCSR379YAE	ENCFF723ZNH.bam	ENCFF881JHI.tsv
suprapubic_skin_male_adult_54_years	total_RNA-seq	ENCSR108MAU	ENCFF602TQM.bam	ENCFF683BZD.tsv
spleen_male_adult_54_years	total_RNA-seq	ENCSR106SZN	ENCFF218JYQ.bam	ENCFF916TWO.tsv
thoracic_aorta_male_adult_37_years	total_RNA-seq	ENCSR429EWK	ENCFF464LEE.bam	ENCFF758JLZ.tsv
transverse_colon_male_adult_54_years	total_RNA-seq	ENCSR630VJN	ENCFF855ZFR.bam	ENCFF014IOZ.tsv
prostate_gland_male_adult_37_years	total_RNA-seq	ENCSR495HDM	ENCFF554BHX.bam	ENCFF454GAP.tsv
mammary_microvascular_endothelial_cell_female_adult_26_years	total_RNA-seq	ENCSR815UVL	ENCFF436WXH.bam	ENCFF018XHI.tsv
esophagus_muscularis_mucosa_female_adult_53_years	total_RNA-seq	ENCSR098BUF	ENCFF581UKT.bam	ENCFF257PBB.tsv
prostate_gland_male_adult_54_years	total_RNA-seq	ENCSR701TST	ENCFF927GGV.bam	ENCFF110THT.tsv
esophagus_muscularis_mucosa_female_adult_51_year	total_RNA-seq	ENCSR620LQN	ENCFF233AGC.bam	ENCFF391YGO.tsv
stomach_female_adult_53_years	total_RNA-seq	ENCSR752UNJ	ENCFF385MSM.bam	ENCFF535HFG.tsv
transverse_colon_male_adult_37_years	total_RNA-seq	ENCSR653ZJF	ENCFF075XIQ.bam	ENCFF505DGK.tsv
sigmoid_colon_male_adult_37_years	total_RNA-seq	ENCSR857WJK	ENCFF225BLR.bam	ENCFF934VJV.tsv
Daoy	total_RNA-seq	ENCSR254JJM	ENCFF179LPC.bam	ENCFF081AIX.tsv
thyroid_gland_female_adult_53_years	total_RNA-seq	ENCSR238ZZD	ENCFF837KPR.bam	ENCFF625QLJ.tsv
tibial_nerve_female_adult_53_years	total_RNA-seq	ENCSR858QEL	ENCFF781EHT.bam	ENCFF939FQC.tsv
gastrocnemius_medialis_female_adult_53_years	total_RNA-seq	ENCSR678TMV	ENCFF408QZN.bam	ENCFF728KWY.tsv
Peyers_patch_male_adult_37_years	total_RNA-seq	ENCSR802HPM	ENCFF050JBO.bam	ENCFF187NLN.tsv
tibial_nerve_male_adult_37_years	total_RNA-seq	ENCSR796HLX	ENCFF227KOB.bam	ENCFF904FEZ.tsv
heart_male_adult_34_years	total_RNA-seq	ENCSR000AHH	ENCFF621SXE.bam	ENCFF717FSL.tsv
upper_lobe_of_left_lung_male_adult_37_years	total_RNA-seq	ENCSR313COD	ENCFF106UAM.bam	ENCFF049ETK.tsv
adrenal_gland_female_adult_51_year	total_RNA-seq	ENCSR801MKV	ENCFF034LVU.bam	ENCFF250FNI.tsv
skeletal_muscle_myoblast	total_RNA-seq	ENCSR444WHQ	ENCFF456RVJ.bam	ENCFF551YKI.tsv
gastroesophageal_sphincter_female_adult_51_year	total_RNA-seq	ENCSR035SKV	ENCFF303BKD.bam	ENCFF338HIM.tsv
subcutaneous_adipose_tissue_female_adult_51_year	total_RNA-seq	ENCSR150QJY	ENCFF412YEB.bam	ENCFF539BTV.tsv
SK_N_DZ_treated_with_dimethyl_sulfoxide	total_RNA-seq	ENCSR136WGP	ENCFF636ASS.bam	ENCFF468WWI.tsv
upper_lobe_of_left_lung_female_adult_53_years	total_RNA-seq	ENCSR406SAW	ENCFF862VTJ.bam	ENCFF360GZR.tsv
stomach_male_adult_37_years	total_RNA-seq	ENCSR471RUK	ENCFF879VGW.bam	ENCFF382HKK.tsv
NCI_H460_cytosolic_fraction	polyA_RNA-seq	ENCSR586SEE	ENCFF863DHJ.bam	ENCFF377EHW.tsv
sigmoid_colon_male_adult_54_years	total_RNA-seq	ENCSR812AKX	ENCFF772DXL.bam	ENCFF146ISW.tsv
Karpas_422	total_RNA-seq	ENCSR314LXG	ENCFF805EYP.bam	ENCFF300CIP.tsv
testis_male_adult_37_years	total_RNA-seq	ENCSR029KNZ	ENCFF952MRX.bam	ENCFF673KOG.tsv
tibial_nerve_female_adult_51_year	total_RNA-seq	ENCSR272UNO	ENCFF114STD.bam	ENCFF241VXT.tsv
H4	total_RNA-seq	ENCSR919QJT	ENCFF886TZT.bam	ENCFF114MWR.tsv
SK_N_DZ_cytosolic_fraction	polyA_RNA-seq	ENCSR569JKX	ENCFF903CUK.bam	ENCFF923VSQ.tsv
transverse_colon_female_adult_53_years	total_RNA-seq	ENCSR800WIY	ENCFF779WGN.bam	ENCFF332OML.tsv
OCI_LY7	total_RNA-seq	ENCSR001HHK	ENCFF859LKJ.bam	ENCFF901PDQ.tsv
epithelial_cell_of_proximal_tubule	total_RNA-seq	ENCSR118TVR	ENCFF122DXM.bam	ENCFF129BNX.tsv
testis_male_adult_54_years	total_RNA-seq	ENCSR344MQK	ENCFF444KCY.bam	ENCFF438ZIY.tsv
right_atrium_auricular_region_female_adult_53_years	total_RNA-seq	ENCSR571RXE	ENCFF931IVY.bam	ENCFF701KTC.tsv
adrenal_gland_male_adult_37_years	total_RNA-seq	ENCSR276MMH	ENCFF265FGI.bam	ENCFF587WDK.tsv
esophagus_muscularis_mucosa_male_adult_37_years	total_RNA-seq	ENCSR182CBU	ENCFF896WIO.bam	ENCFF660MOE.tsv
spleen_female_adult_51_year	total_RNA-seq	ENCSR194HVU	ENCFF060PRQ.bam	ENCFF087VIO.tsv
breast_epithelium_female_adult_53_years	total_RNA-seq	ENCSR434TEU	ENCFF936QYI.bam	ENCFF912TDO.tsv
body_of_pancreas_female_adult_51_year	total_RNA-seq	ENCSR671IYC	ENCFF121HEE.bam	ENCFF368OME.tsv
esophagus_squamous_epithelium_female_adult_53_years	total_RNA-seq	ENCSR351OTL	ENCFF100AAD.bam	ENCFF610JUD.tsv
adrenal_gland_female_adult_53_years	total_RNA-seq	ENCSR754WLW	ENCFF174SBU.bam	ENCFF254VJQ.tsv
cardiac_atrium_fibroblast_male_child_2_years	total_RNA-seq	ENCSR110BDY	ENCFF334MAG.bam	ENCFF314HNA.tsv
fibroblast_of_arm_male_adult_53_years	total_RNA-seq	ENCSR797BPP	ENCFF378EQH.bam	ENCFF704TVE.tsv
Peyers_patch_male_adult_54_years	total_RNA-seq	ENCSR257NIR	ENCFF998TZQ.bam	ENCFF336EQS.tsv
adrenal_gland_male_adult_54_years	total_RNA-seq	ENCSR954PZB	ENCFF016ARQ.bam	ENCFF036ERC.tsv
ovary_female_adult_53_years	total_RNA-seq	ENCSR841ADZ	ENCFF709ZOS.bam	ENCFF232UER.tsv
hepatocyte_derived_from_H9	total_RNA-seq	ENCSR908ZAS	ENCFF342APT.bam	ENCFF962SOD.tsv

## Sheet: Dnase-seq
Sample	ENCODE Experiment ID	Signal File
thyroid_gland_male_adult_54_years	ENCSR902XFY	ENCFF166WQI.bigWig
thyroid_gland_male_adult_37_years	ENCSR158VAT	ENCFF822UFJ.bigWig
OCI_LY7	ENCSR489NAM	ENCFF020KCP.bigWig
adrenal_gland_male_adult_37_years	ENCSR191FOV	ENCFF332HYA.bigWig
K562	ENCSR000EPC	ENCFF686NUN.bigWig
A172	ENCSR932KWJ	ENCFF500ZNG.bigWig
transverse_colon_female_adult_53_years	ENCSR504WYA	ENCFF738TTH.bigWig
H4	ENCSR809CEA	ENCFF880HQJ.bigWig
fibroblast_of_arm_male_adult_53_years	ENCSR217TAW	ENCFF785WSP.bigWig
GM12878	ENCSR000EMT	ENCFF131XEA.bigWig
transverse_colon_male_adult_37_years	ENCSR979ZJS	ENCFF390TTU.bigWig
Daoy	ENCSR346IHH	ENCFF576IAN.bigWig
uterus_female_adult_53_years	ENCSR237WJY	ENCFF707TYP.bigWig
ovary_female_adult_51_years	ENCSR855DJV	ENCFF675RRE.bigWig
SJSA1	ENCSR620WAR	ENCFF546LCQ.bigWig
transverse_colon_male_adult_54_years	ENCSR790FIS	ENCFF341QJU.bigWig
sigmoid_colon_female_adult_53_years	ENCSR907VOR	ENCFF932GNW.bigWig
esophagus_squamous_epithelium_female_adult_53_years	ENCSR579BNV	ENCFF174RSF.bigWig
Karpas_422	ENCSR019JDO	ENCFF252XGM.bigWig
neural_progenitor_cell_derived_from_H9	ENCSR963ALV	ENCFF817EJO.bigWig
epithelial_cell_of_proximal_tubule	ENCSR000EPW	ENCFF586LBQ.bigWig
HT_29	ENCSR814KRX	ENCFF419MBI.bigWig
adrenal_gland_male_adult_54_years	ENCSR848XIY	ENCFF869QKK.bigWig
right_lobe_of_liver_female_adult_53_years	ENCSR174TIP	ENCFF354ZKN.bigWig
SK_MEL_5	ENCSR000FEK	ENCFF049HXK.bigWig
adrenal_gland_female_adult_51_years	ENCSR865ICK	ENCFF205TQN.bigWig
myotube	ENCSR000EOP	ENCFF279THP.bigWig
HT1080	ENCSR000FDI	ENCFF930ZWL.bigWig
SJCRH30	ENCSR000FFJ	ENCFF866SXV.bigWig
testis_male_adult_37_years	ENCSR475SYH	ENCFF844QLU.bigWig
induced_pluripotent_stem_cell_male_adult_53_years_derived_from_fibroblast_of_arm	ENCSR004SUL	ENCFF920RNE.bigWig
NCI_H460	ENCSR000FJH	ENCFF824THZ.bigWig
prostate_gland_male_adult_54_years	ENCSR456SOX	ENCFF856IEB.bigWig
thyroid_gland_female_adult_51_years	ENCSR657DFR	ENCFF074DNE.bigWig
hepatocyte_derived_from_H9	ENCSR364MFN	ENCFF315GOQ.bigWig
H7_hESC	ENCSR000EMZ	ENCFF405ZPU.bigWig
SK_N_DZ_treated_with_dimethyl_sulfoxide	ENCSR000FJL	ENCFF160AGD.bigWig
PC_3	ENCSR052AWE	ENCFF379CCW.bigWig

## Sheet: Histone ChIP-seq
Sample	Target	ENCODE Experiment ID	Signal File
K562	H2AFZ	ENCSR000APC	ENCFF191EXE.bigWig
K562	H3K27ac	ENCSR000AKP	ENCFF010PHG.bigWig
K562	H3K27me3	ENCSR000AKQ	ENCFF445UCR.bigWig
K562	H3K36me3	ENCSR000AKR	ENCFF678IWR.bigWig
K562	H3K4me1	ENCSR000AKS	ENCFF526QTS.bigWig
K562	H3K4me2	ENCSR000AKT	ENCFF118MMT.bigWig
K562	H3K4me3	ENCSR668LDD	ENCFF689TMV.bigWig
K562	H3K79me2	ENCSR000APD	ENCFF003CLZ.bigWig
K562	H3K9ac	ENCSR000AKV	ENCFF602QRW.bigWig
K562	H3K9me3	ENCSR000APE	ENCFF834YLI.bigWig
K562	H4K20me1	ENCSR000AKX	ENCFF143CUR.bigWig
GM12878	H2AFZ	ENCSR000AOV	ENCFF885XEM.bigWig
GM12878	H3K27ac	ENCSR000AKC	ENCFF180LKW.bigWig
GM12878	H3K27me3	ENCSR000AKD	ENCFF167NBF.bigWig
GM12878	H3K36me3	ENCSR000DRW	ENCFF662QFK.bigWig
GM12878	H3K4me1	ENCSR000AKF	ENCFF682WPF.bigWig
GM12878	H3K4me2	ENCSR000AKG	ENCFF828CQV.bigWig
GM12878	H3K4me3	ENCSR057BWO	ENCFF818GNV.bigWig
GM12878	H3K79me2	ENCSR000AOW	ENCFF396JIR.bigWig
GM12878	H3K9ac	ENCSR000AKH	ENCFF465KNK.bigWig
GM12878	H3K9me3	ENCSR000AOX	ENCFF846MPX.bigWig
GM12878	H4K20me1	ENCSR000AKI	ENCFF831WYD.bigWig
PC_3	H2AFZ	ENCSR946QFD	ENCFF016OLO.bigWig
PC_3	H3K27ac	ENCSR826UTD	ENCFF792XEZ.bigWig
PC_3	H3K27me3	ENCSR881TWJ	ENCFF343HCA.bigWig
PC_3	H3K36me3	ENCSR849APH	ENCFF225IIE.bigWig
PC_3	H3K4me1	ENCSR566UMF	ENCFF880BPF.bigWig
PC_3	H3K4me2	ENCSR788EQL	ENCFF869JUP.bigWig
PC_3	H3K4me3	ENCSR275NCH	ENCFF321KXR.bigWig
PC_3	H3K79me2	ENCSR695SCQ	ENCFF219MFQ.bigWig
PC_3	H3K9ac	ENCSR197QXT	ENCFF983PED.bigWig
PC_3	H3K9me3	ENCSR339ZMJ	ENCFF132BCE.bigWig
PC_3	H4K20me1	ENCSR764KFK	ENCFF133UPT.bigWig

## Sheet: TF ChIP-seq
Sample	Target	ENCODE Experiment ID	Signal File
K562	POLR3A	ENCSR000DOI	ENCFF000YYP.bigWig
K562	GTF3C2	ENCSR000DOD	ENCFF000ZBW.bigWig
K562	BDP1	ENCSR000DOK	ENCFF000YGA.bigWig
K562	BRF1	ENCSR000DOJ	ENCFF000YGO.bigWig
K562	BRF2	ENCSR000DOC	ENCFF000YGX.bigWig
K562	HDAC3	ENCSR024LKA	ENCFF137LOO.bigWig
K562	MITF	ENCSR000FCB	ENCFF427TQP.bigWig
K562	SMARCE1	ENCSR157TCS	ENCFF348YUO.bigWig
K562	MGA	ENCSR710WLO	ENCFF932XMO.bigWig
K562	ZNF280A	ENCSR370NFS	ENCFF951RIW.bigWig
K562	EWSR1	ENCSR142YYA	ENCFF875OWQ.bigWig
K562	RFX1	ENCSR968GIB	ENCFF156KTG.bigWig
K562	DNMT1	ENCSR987PBI	ENCFF820AVX.bigWig
K562	MCM5	ENCSR079WHK	ENCFF243CWO.bigWig
K562	HDAC2	ENCSR075HTM	ENCFF697WDH.bigWig
K562	JUN	ENCSR000EFS	ENCFF780KHA.bigWig
K562	ELF1	ENCSR502OEK	ENCFF963YVX.bigWig
K562	NR0B1	ENCSR764YDL	ENCFF259JBX.bigWig
K562	PHB2	ENCSR924GXX	ENCFF776ZKG.bigWig
K562	STAT5A	ENCSR000BRR	ENCFF832FFP.bigWig
K562	ARID1B	ENCSR822CCM	ENCFF750FNO.bigWig
K562	ZNF318	ENCSR352BJL	ENCFF609CBO.bigWig
K562	EP400	ENCSR817QKV	ENCFF226XAW.bigWig
K562	NFYA	ENCSR000EGR	ENCFF802NVY.bigWig
K562	CC2D1A	ENCSR343IFJ	ENCFF856RTE.bigWig
K562	GATA2	ENCSR000EWG	ENCFF407RUQ.bigWig
K562	TEAD4	ENCSR000BRK	ENCFF920AQK.bigWig
K562	NFE2	ENCSR000FCC	ENCFF557POT.bigWig
K562	NR2C1	ENCSR742IDN	ENCFF490IPR.bigWig
K562	CBX3	ENCSR000BRT	ENCFF630YDI.bigWig
K562	MCM7	ENCSR542WJU	ENCFF028PQJ.bigWig
K562	ZZZ3	ENCSR780BBJ	ENCFF716WJE.bigWig
K562	MIER1	ENCSR426MDV	ENCFF332DMO.bigWig
K562	ZNF639	ENCSR949NVY	ENCFF990HHK.bigWig
K562	ZBTB5	ENCSR786OQY	ENCFF477PQL.bigWig
K562	RBM25	ENCSR791OZM	ENCFF821RCB.bigWig
K562	SMARCA5	ENCSR895HSJ	ENCFF847GKQ.bigWig
K562	CUX1	ENCSR000EFO	ENCFF950NCQ.bigWig
K562	CREM	ENCSR077DKV	ENCFF026KYB.bigWig
K562	ZNF407	ENCSR011NOZ	ENCFF972MUU.bigWig
K562	MEIS2	ENCSR851BNE	ENCFF447BCK.bigWig
K562	GATA1	ENCSR000EFT	ENCFF833CBY.bigWig
K562	CBX5	ENCSR272JAT	ENCFF014XHT.bigWig
K562	RBM15	ENCSR850WUE	ENCFF948XVB.bigWig
K562	ETV6	ENCSR000FCE	ENCFF884NXM.bigWig
K562	USF2	ENCSR000EHG	ENCFF605DSA.bigWig
K562	MYNN	ENCSR737LTZ	ENCFF145XHA.bigWig
K562	MBD2	ENCSR221GAN	ENCFF371KUO.bigWig
K562	MNT	ENCSR979QYJ	ENCFF205WHE.bigWig
K562	TAL1	ENCSR106FRG	ENCFF617UEO.bigWig
K562	JUND	ENCSR000EGN	ENCFF709JGL.bigWig
K562	UBTF	ENCSR000EFZ	ENCFF466ZQX.bigWig
K562	SUZ12	ENCSR412CTM	ENCFF363DWX.bigWig
K562	PYGO2	ENCSR431XGJ	ENCFF957LKR.bigWig
K562	BMI1	ENCSR782WRO	ENCFF514QBY.bigWig
K562	TCF7L2	ENCSR888XZK	ENCFF899DYD.bigWig
K562	SRSF3	ENCSR268QIQ	ENCFF890RUD.bigWig
K562	BRCA1	ENCSR223MLH	ENCFF279WBA.bigWig
K562	ZBTB7A	ENCSR000BME	ENCFF457PSO.bigWig
K562	SRSF7	ENCSR222MYK	ENCFF130UBB.bigWig
K562	CDC5L	ENCSR121PFY	ENCFF739MHD.bigWig
K562	SAFB2	ENCSR724GSW	ENCFF408SHD.bigWig
K562	ZNF274	ENCSR000EVX	ENCFF296ZAW.bigWig
K562	EHMT2	ENCSR175EOM	ENCFF982RMW.bigWig
K562	NFXL1	ENCSR085DDI	ENCFF906FIL.bigWig
K562	ZNF263	ENCSR000EWN	ENCFF318FFG.bigWig
K562	ASH1L	ENCSR115BBC	ENCFF016YLI.bigWig
K562	E2F1	ENCSR563LLO	ENCFF009LGS.bigWig
K562	NCOA4	ENCSR119ULQ	ENCFF452BMC.bigWig
K562	PCBP2	ENCSR603REQ	ENCFF175XYE.bigWig
K562	POLR2G	ENCSR283ZRI	ENCFF540CYY.bigWig
K562	BCOR	ENCSR808AKZ	ENCFF243LGY.bigWig
K562	ARHGAP35	ENCSR571BUF	ENCFF694WYQ.bigWig
K562	SIN3A	ENCSR920BLG	ENCFF783JQV.bigWig
K562	ELF4	ENCSR638QHV	ENCFF121DYK.bigWig
K562	ETS1	ENCSR000BKQ	ENCFF771GEW.bigWig
K562	HNRNPK	ENCSR014RCS	ENCFF754BMR.bigWig
K562	ARID2	ENCSR491EBY	ENCFF232MAF.bigWig
K562	ZKSCAN1	ENCSR882ERE	ENCFF181YKE.bigWig
K562	PKNOX1	ENCSR115SMW	ENCFF258LRW.bigWig
K562	U2AF1	ENCSR690GUG	ENCFF084VEW.bigWig
K562	IRF2	ENCSR376WCJ	ENCFF319KZQ.bigWig
K562	PCBP1	ENCSR052PTN	ENCFF340HZR.bigWig
K562	ATF4	ENCSR145TSJ	ENCFF703NOB.bigWig
K562	SMAD1	ENCSR038DJJ	ENCFF434JPE.bigWig
K562	SMAD2	ENCSR189PYJ	ENCFF217SDS.bigWig
K562	E4F1	ENCSR731LHZ	ENCFF093MRW.bigWig
K562	NR2F6	ENCSR707QWA	ENCFF142EXA.bigWig
K562	PHF8	ENCSR000AQH	ENCFF427QTV.bigWig
K562	ZEB2	ENCSR322CFO	ENCFF120VOJ.bigWig
K562	HMBOX1	ENCSR757IIU	ENCFF614EKZ.bigWig
K562	RBBP5	ENCSR000AQI	ENCFF058KTS.bigWig
K562	BACH1	ENCSR000EGD	ENCFF183XFF.bigWig
K562	PRPF4	ENCSR220YXI	ENCFF472ISV.bigWig
K562	U2AF2	ENCSR479QAJ	ENCFF757MVK.bigWig
K562	ZMIZ1	ENCSR907JPB	ENCFF257YKB.bigWig
K562	FIP1L1	ENCSR177DNR	ENCFF377LTD.bigWig
K562	ZMYM3	ENCSR102KIN	ENCFF711IOY.bigWig
K562	HES1	ENCSR091JXL	ENCFF071USV.bigWig
K562	SMARCC2	ENCSR519WMW	ENCFF810GGD.bigWig
K562	GABPA	ENCSR000BLO	ENCFF869WSZ.bigWig
K562	E2F8	ENCSR953DVM	ENCFF092WDH.bigWig
K562	GABPB1	ENCSR138YYY	ENCFF389ZEM.bigWig
K562	RBM22	ENCSR848AOP	ENCFF411ILS.bigWig
K562	ZBTB8A	ENCSR283ZNI	ENCFF232LHF.bigWig
K562	BRD4	ENCSR583ACG	ENCFF260JHC.bigWig
K562	NEUROD1	ENCSR986CDX	ENCFF733OEF.bigWig
K562	C11orf30	ENCSR350XWY	ENCFF219HQE.bigWig
K562	THRA	ENCSR264CZJ	ENCFF635LIW.bigWig
K562	RNF2	ENCSR608XTF	ENCFF320VKN.bigWig
K562	DPF2	ENCSR715CCR	ENCFF950HQL.bigWig
K562	NFIC	ENCSR796ITY	ENCFF474SAL.bigWig
K562	NBN	ENCSR085QEV	ENCFF676AOK.bigWig
K562	ZNF143	ENCSR000EGP	ENCFF178RYF.bigWig
K562	MAX	ENCSR000BLP	ENCFF626PTB.bigWig
K562	LEF1	ENCSR343ELW	ENCFF766KPI.bigWig
K562	YY1	ENCSR000BMH	ENCFF384ERU.bigWig
K562	ZBTB40	ENCSR237VLT	ENCFF882ZUY.bigWig
K562	CREB3L1	ENCSR109YGM	ENCFF274RCD.bigWig
K562	KDM5B	ENCSR000AQA	ENCFF293III.bigWig
K562	DEAF1	ENCSR387SYS	ENCFF187GTP.bigWig
K562	BHLHE40	ENCSR000EGV	ENCFF765OJY.bigWig
K562	THAP1	ENCSR000BNN	ENCFF993AHY.bigWig
K562	NCOR1	ENCSR910JAI	ENCFF292YLV.bigWig
K562	TRIM28	ENCSR474CVP	ENCFF165QYW.bigWig
K562	MCM3	ENCSR990AZC	ENCFF332WPW.bigWig
K562	SMAD5	ENCSR000FCD	ENCFF235RTU.bigWig
K562	NR3C1	ENCSR494UQJ	ENCFF868UXP.bigWig
K562	REST	ENCSR137ZMQ	ENCFF571ECM.bigWig
K562	NFYB	ENCSR000EGQ	ENCFF547XEW.bigWig
K562	ZHX1	ENCSR557RVF	ENCFF963SBX.bigWig
K562	MCM2	ENCSR138SFL	ENCFF907SAR.bigWig
K562	SKIL	ENCSR336DXE	ENCFF770SFT.bigWig
K562	L3MBTL2	ENCSR530XQI	ENCFF890UUN.bigWig
K562	IKZF1	ENCSR948VFL	ENCFF715OCK.bigWig
K562	KAT8	ENCSR086FZL	ENCFF068JOG.bigWig
K562	KLF16	ENCSR760UVO	ENCFF161TZI.bigWig
K562	SETDB1	ENCSR000EWI	ENCFF417WRG.bigWig
K562	CTBP1	ENCSR201NQZ	ENCFF112LWM.bigWig
K562	RFX5	ENCSR000EGO	ENCFF759LQL.bigWig
K562	HNRNPUL1	ENCSR296MXW	ENCFF195XFH.bigWig
K562	E2F6	ENCSR000BLI	ENCFF123OID.bigWig
K562	ZBTB2	ENCSR230PTV	ENCFF715FKT.bigWig
K562	MYC	ENCSR000EGJ	ENCFF790FHL.bigWig
K562	HDAC1	ENCSR711VWL	ENCFF614WRB.bigWig
K562	RBM17	ENCSR836COE	ENCFF130KQG.bigWig
K562	RBM34	ENCSR899GSH	ENCFF319QUS.bigWig
K562	NR2C2	ENCSR000EWH	ENCFF573HAI.bigWig
K562	SREBF1	ENCSR815ZDS	ENCFF111BSU.bigWig
K562	ZBTB11	ENCSR331GDC	ENCFF693GNL.bigWig
K562	CEBPB	ENCSR000EHE	ENCFF513ZML.bigWig
K562	ELK1	ENCSR000EFU	ENCFF996CPV.bigWig
K562	FOXM1	ENCSR429QPP	ENCFF581TEU.bigWig
K562	RAD51	ENCSR524BUE	ENCFF532QDR.bigWig
K562	ZBTB33	ENCSR876GXA	ENCFF563KAU.bigWig
K562	NR2F1	ENCSR970NKQ	ENCFF928QBF.bigWig
K562	NFRKB	ENCSR657EOF	ENCFF231QPU.bigWig
K562	ZSCAN29	ENCSR635EXI	ENCFF025DGW.bigWig
K562	ZNF184	ENCSR546IHU	ENCFF452SVJ.bigWig
K562	SIX5	ENCSR000BNW	ENCFF925ZXV.bigWig
K562	RBFOX2	ENCSR822LBD	ENCFF600MKI.bigWig
K562	ZNF316	ENCSR167KBO	ENCFF617XZE.bigWig
K562	TAF15	ENCSR047LSJ	ENCFF405IFO.bigWig
K562	FOXA1	ENCSR819LHG	ENCFF147BRO.bigWig
K562	ZBED1	ENCSR286PCG	ENCFF876HAD.bigWig
K562	ATF3	ENCSR028UIU	ENCFF783IOJ.bigWig
K562	NCOA2	ENCSR349TZO	ENCFF410NKD.bigWig
K562	TRIP13	ENCSR154EIH	ENCFF317QLL.bigWig
K562	SMARCB1	ENCSR000EHN	ENCFF800FII.bigWig
K562	NCOA6	ENCSR168CEE	ENCFF547KCR.bigWig
K562	USF1	ENCSR000BKT	ENCFF455JRF.bigWig
K562	TAF7	ENCSR000BNM	ENCFF495ETG.bigWig
K562	MXI1	ENCSR000EGZ	ENCFF120GUN.bigWig
K562	SAFB	ENCSR072VUO	ENCFF163TQK.bigWig
K562	SIN3B	ENCSR657JLK	ENCFF036PQP.bigWig
K562	CTCF	ENCSR000EGM	ENCFF933ZLL.bigWig
K562	NUFIP1	ENCSR574XEO	ENCFF645UPN.bigWig
K562	FUS	ENCSR051DXE	ENCFF380ABG.bigWig
K562	SAP30	ENCSR000AQJ	ENCFF816KCQ.bigWig
K562	HNRNPL	ENCSR594BNR	ENCFF174JFC.bigWig
K562	HNRNPLL	ENCSR112RNT	ENCFF973NPC.bigWig
K562	BRD9	ENCSR177XCS	ENCFF036WGZ.bigWig
K562	KDM1A	ENCSR360HRA	ENCFF758MEL.bigWig
K562	TCF7	ENCSR863KUB	ENCFF005PNR.bigWig
K562	CTCFL	ENCSR000BNK	ENCFF648ABV.bigWig
K562	PRDM10	ENCSR120MPG	ENCFF251XOX.bigWig
K562	ZNF282	ENCSR742TMU	ENCFF290UIT.bigWig
K562	MAFK	ENCSR000EGX	ENCFF964KPV.bigWig
K562	EGR1	ENCSR211LTF	ENCFF461LTA.bigWig
K562	JUNB	ENCSR795IYP	ENCFF511DBK.bigWig
K562	MTA3	ENCSR914NEI	ENCFF230NBV.bigWig
K562	SNRNP70	ENCSR754ZHU	ENCFF989OXX.bigWig
K562	KDM4B	ENCSR660RNO	ENCFF480PRG.bigWig
K562	XRCC5	ENCSR506KWJ	ENCFF753TWJ.bigWig
K562	FOXK2	ENCSR508DQA	ENCFF688YSP.bigWig
K562	HCFC1	ENCSR000EFN	ENCFF633TLX.bigWig
K562	NFATC3	ENCSR670FDA	ENCFF254BMS.bigWig
K562	RLF	ENCSR718SDE	ENCFF373XUB.bigWig
K562	CBX1	ENCSR948QLZ	ENCFF762MAM.bigWig
K562	DACH1	ENCSR030TJP	ENCFF620DCM.bigWig
K562	HDAC6	ENCSR000ATJ	ENCFF177KCK.bigWig
K562	MTA2	ENCSR411UYA	ENCFF925QKK.bigWig
K562	ATF7	ENCSR972ZBV	ENCFF249KVC.bigWig
K562	RUNX1	ENCSR414TYY	ENCFF962DIA.bigWig
K562	NRF1	ENCSR998AJK	ENCFF966TQS.bigWig
K562	SOX6	ENCSR788RSW	ENCFF757HAQ.bigWig
K562	ZFP91	ENCSR898XMH	ENCFF285MPA.bigWig
K562	E2F7	ENCSR171CAY	ENCFF103XPY.bigWig
K562	GATAD2A	ENCSR160QYK	ENCFF269YNO.bigWig
K562	PHF21A	ENCSR119VCX	ENCFF224PYH.bigWig
K562	CBFA2T2	ENCSR699PVC	ENCFF398DKE.bigWig
K562	CBFA2T3	ENCSR697YLJ	ENCFF321EPM.bigWig
K562	COPS2	ENCSR130HEG	ENCFF684JZK.bigWig
K562	GATAD2B	ENCSR547LKC	ENCFF755NBK.bigWig
K562	ZNF592	ENCSR249BHQ	ENCFF280MOK.bigWig
K562	RCOR1	ENCSR000EGC	ENCFF550TDY.bigWig
K562	TCF12	ENCSR189TRZ	ENCFF518HBT.bigWig
K562	NCOA1	ENCSR931HNY	ENCFF941LGJ.bigWig
K562	ZNF830	ENCSR851XLW	ENCFF458WXS.bigWig
K562	MYBL2	ENCSR162IEM	ENCFF487KQK.bigWig
K562	CHAMP1	ENCSR065XVO	ENCFF087XWL.bigWig
K562	TRIM24	ENCSR907MZR	ENCFF868YDK.bigWig
K562	XRCC3	ENCSR997NGQ	ENCFF660YEV.bigWig
K562	ARID3A	ENCSR000EFY	ENCFF107YJY.bigWig
K562	MLLT1	ENCSR107GRP	ENCFF024YIP.bigWig
K562	ATF2	ENCSR869IUD	ENCFF454KQY.bigWig
K562	ESRRA	ENCSR486IFJ	ENCFF827COK.bigWig
K562	PML	ENCSR000BQY	ENCFF746UXC.bigWig
K562	TBL1XR1	ENCSR000EGA	ENCFF350TPD.bigWig
K562	ZNF24	ENCSR385AHH	ENCFF282CAH.bigWig
K562	HNRNPH1	ENCSR581CVA	ENCFF424LYB.bigWig
K562	MAFF	ENCSR000EGI	ENCFF931BLV.bigWig
K562	MTA1	ENCSR807BGP	ENCFF194ZGF.bigWig
K562	NR2F2	ENCSR000BRS	ENCFF335LTU.bigWig
K562	CBX8	ENCSR000ATW	ENCFF206WVX.bigWig
K562	SMC3	ENCSR000EGW	ENCFF479BWQ.bigWig
K562	FOSL1	ENCSR000BMV	ENCFF857ARL.bigWig
K562	SP1	ENCSR991ELG	ENCFF591WIF.bigWig
K562	EP300	ENCSR000EGE	ENCFF152DJG.bigWig
K562	ZNF384	ENCSR000EFP	ENCFF657QMO.bigWig
K562	GMEB1	ENCSR928KOR	ENCFF306QAA.bigWig
K562	SMARCA4	ENCSR587OQL	ENCFF748JPG.bigWig
K562	TAF1	ENCSR000BKS	ENCFF488POX.bigWig
K562	PHF20	ENCSR594SMP	ENCFF905ZIF.bigWig
K562	TAF9B	ENCSR100UQX	ENCFF830MKJ.bigWig
K562	RB1	ENCSR670JDQ	ENCFF989VKY.bigWig
K562	AFF1	ENCSR426URK	ENCFF813XDC.bigWig
K562	TBP	ENCSR000EHA	ENCFF752GLM.bigWig
K562	POLR2A	ENCSR388QZF	ENCFF647MSS.bigWig
K562	RBM39	ENCSR764OXF	ENCFF046WHP.bigWig
K562	ARNT	ENCSR613NUC	ENCFF738ADF.bigWig
K562	PTBP1	ENCSR948KMB	ENCFF913LYD.bigWig
K562	AGO1	ENCSR641BSL	ENCFF054VBS.bigWig
K562	SRSF9	ENCSR814AJH	ENCFF878SUX.bigWig
K562	RBM14	ENCSR423FCW	ENCFF707TKH.bigWig
K562	MEF2A	ENCSR000BNV	ENCFF479KSD.bigWig
K562	CCAR2	ENCSR598GER	ENCFF761YMH.bigWig
K562	THRAP3	ENCSR871TKJ	ENCFF341OHT.bigWig
K562	SUPT5H	ENCSR894CGX	ENCFF754ZCQ.bigWig
K562	BCLAF1	ENCSR492LTS	ENCFF136RAF.bigWig
K562	POLR2B	ENCSR325RLL	ENCFF685ZXF.bigWig
K562	GTF2F1	ENCSR377BLZ	ENCFF951FOV.bigWig
K562	ZFP36	ENCSR776CYN	ENCFF926GDZ.bigWig
K562	NONO	ENCSR886RYH	ENCFF277LMC.bigWig
K562	CEBPZ	ENCSR618GDK	ENCFF324NIB.bigWig
K562	POU5F1	ENCSR364SNE	ENCFF579RNC.bigWig
K562	TARDBP	ENCSR033VAZ	ENCFF305FZG.bigWig
K562	YBX3	ENCSR567JEU	ENCFF889PGD.bigWig
K562	ILF3	ENCSR632TJQ	ENCFF120KHN.bigWig
K562	ZC3H11A	ENCSR000EFR	ENCFF029VKA.bigWig
K562	DDX20	ENCSR446LAV	ENCFF038EVN.bigWig
K562	HDGF	ENCSR563YDA	ENCFF606AWH.bigWig
K562	SNIP1	ENCSR654CQU	ENCFF673WUS.bigWig
K562	YBX1	ENCSR107RHZ	ENCFF424GQF.bigWig
K562	FOS	ENCSR000FAI	ENCFF000YIF.bigWig
K562	CREB1	ENCSR000BSO	ENCFF000PXQ.bigWig
K562	SPI1	ENCSR000BGW	ENCFF000QDV.bigWig
K562	RAD21	ENCSR000FAD	ENCFF000YXZ.bigWig
K562	LARP7	ENCSR288MOZ	ENCFF685CPY.bigWig
K562	NKRF	ENCSR331BDJ	ENCFF932XGZ.bigWig
GM12878	E4F1	ENCSR439WAF	ENCFF167WPQ.bigWig
GM12878	MLLT1	ENCSR552XSN	ENCFF319DUB.bigWig
GM12878	USF2	ENCSR000DZU	ENCFF830RBU.bigWig
GM12878	MEF2B	ENCSR177VFS	ENCFF637YIA.bigWig
GM12878	MTA2	ENCSR293QAR	ENCFF021OHP.bigWig
GM12878	ESRRA	ENCSR000DYQ	ENCFF774MPS.bigWig
GM12878	NBN	ENCSR278SQL	ENCFF601VCM.bigWig
GM12878	IRF5	ENCSR976TBC	ENCFF975GNN.bigWig
GM12878	TCF7	ENCSR501DKS	ENCFF758RBF.bigWig
GM12878	IKZF1	ENCSR874AFU	ENCFF576UWV.bigWig
GM12878	NR2C2	ENCSR000EUL	ENCFF861LRM.bigWig
GM12878	CREM	ENCSR839XZU	ENCFF403JWE.bigWig
GM12878	E2F8	ENCSR793HVL	ENCFF284FKX.bigWig
GM12878	ETS1	ENCSR000BKA	ENCFF292DYY.bigWig
GM12878	IKZF2	ENCSR680UQE	ENCFF045XLJ.bigWig
GM12878	PAX8	ENCSR192AFN	ENCFF463YMM.bigWig
GM12878	NFIC	ENCSR000BRN	ENCFF996TKN.bigWig
GM12878	SKIL	ENCSR212YKD	ENCFF261BLY.bigWig
GM12878	HSF1	ENCSR009MBP	ENCFF455ZPQ.bigWig
GM12878	CEBPB	ENCSR681NOM	ENCFF481MMI.bigWig
GM12878	ELK1	ENCSR000DZB	ENCFF979FNK.bigWig
GM12878	RAD21	ENCSR000BMY	ENCFF567EGK.bigWig
GM12878	EBF1	ENCSR000BGU	ENCFF381QKO.bigWig
GM12878	ZBTB40	ENCSR189YYK	ENCFF806TXV.bigWig
GM12878	NRF1	ENCSR000DZO	ENCFF323SMV.bigWig
GM12878	E2F4	ENCSR000DYY	ENCFF926RPL.bigWig
GM12878	SIX5	ENCSR000BJE	ENCFF371AOB.bigWig
GM12878	PKNOX1	ENCSR711XNY	ENCFF837DPP.bigWig
GM12878	NFATC1	ENCSR000BQL	ENCFF963CDS.bigWig
GM12878	ZNF384	ENCSR000DYP	ENCFF957MTQ.bigWig
GM12878	UBTF	ENCSR459FTB	ENCFF127MEU.bigWig
GM12878	SIN3A	ENCSR000DYX	ENCFF747GCR.bigWig
GM12878	ETV6	ENCSR626VUC	ENCFF869EQD.bigWig
GM12878	BHLHE40	ENCSR987MTA	ENCFF522MRN.bigWig
GM12878	BMI1	ENCSR469WII	ENCFF407PLR.bigWig
GM12878	TBX21	ENCSR739IHN	ENCFF193RDB.bigWig
GM12878	CBX3	ENCSR549NPZ	ENCFF560MPE.bigWig
GM12878	TBP	ENCSR000DZZ	ENCFF595HYD.bigWig
GM12878	ZEB1	ENCSR000BND	ENCFF167NPM.bigWig
GM12878	TAF1	ENCSR000BGS	ENCFF411THR.bigWig
GM12878	RAD51	ENCSR482TWQ	ENCFF017TFI.bigWig
GM12878	NFATC3	ENCSR437GBJ	ENCFF799JAS.bigWig
GM12878	ARNT	ENCSR590KEQ	ENCFF489AGF.bigWig
GM12878	STAT1	ENCSR332EYT	ENCFF281ULQ.bigWig
GM12878	PAX5	ENCSR000BHJ	ENCFF267GFQ.bigWig
GM12878	ZBTB33	ENCSR542FLV	ENCFF996DZN.bigWig
GM12878	EED	ENCSR199WXF	ENCFF758PJS.bigWig
GM12878	MTA3	ENCSR000BRH	ENCFF906VFS.bigWig
GM12878	MEF2C	ENCSR000BNG	ENCFF845FPS.bigWig
GM12878	FOXK2	ENCSR861JUQ	ENCFF285JUZ.bigWig
GM12878	TRIM22	ENCSR835XKS	ENCFF896KWL.bigWig
GM12878	MAX	ENCSR000DZF	ENCFF129MWP.bigWig
GM12878	ZNF143	ENCSR936XTK	ENCFF454HNA.bigWig
GM12878	RELB	ENCSR387QUV	ENCFF389ZFU.bigWig
GM12878	ZZZ3	ENCSR000DNQ	ENCFF971DNG.bigWig
GM12878	BCL3	ENCSR000BNQ	ENCFF366FDQ.bigWig
GM12878	IRF4	ENCSR000BGY	ENCFF291ILI.bigWig
GM12878	SMARCA5	ENCSR706YUH	ENCFF943WFE.bigWig
GM12878	ZNF24	ENCSR072PWP	ENCFF133LHQ.bigWig
GM12878	REST	ENCSR000BGF	ENCFF833UPI.bigWig
GM12878	MXI1	ENCSR000DZI	ENCFF840ZJM.bigWig
GM12878	IRF3	ENCSR408JQO	ENCFF785IFK.bigWig
GM12878	CUX1	ENCSR000DYR	ENCFF086OCM.bigWig
GM12878	RBBP5	ENCSR330EXS	ENCFF042FRR.bigWig
GM12878	KDM1A	ENCSR391IWM	ENCFF777QJK.bigWig
GM12878	CHD1	ENCSR000DZE	ENCFF405ZKS.bigWig
GM12878	RCOR1	ENCSR000DZC	ENCFF483ELN.bigWig
GM12878	STAT5A	ENCSR000BQZ	ENCFF113XQT.bigWig
GM12878	WRNIP1	ENCSR000EAA	ENCFF526WWD.bigWig
GM12878	HDAC2	ENCSR330OEO	ENCFF675TUL.bigWig
GM12878	RUNX3	ENCSR000BRI	ENCFF238SAO.bigWig
GM12878	MYB	ENCSR819ATC	ENCFF784YSY.bigWig
GM12878	KLF5	ENCSR974OFJ	ENCFF279FLZ.bigWig
GM12878	CHD4	ENCSR751CJG	ENCFF642RXD.bigWig
GM12878	ASH2L	ENCSR849WCQ	ENCFF664LBN.bigWig
GM12878	HCFC1	ENCSR514VAY	ENCFF686ASL.bigWig
GM12878	JUNB	ENCSR897MMC	ENCFF278JRW.bigWig
GM12878	TBL1XR1	ENCSR000DYZ	ENCFF816KEF.bigWig
GM12878	CBFB	ENCSR860UHK	ENCFF327KPH.bigWig
GM12878	SMAD1	ENCSR813DCK	ENCFF202VQL.bigWig
GM12878	EZH2	ENCSR000ARD	ENCFF410SZR.bigWig
GM12878	USF1	ENCSR000BGI	ENCFF427RYH.bigWig
GM12878	BRCA1	ENCSR000DZS	ENCFF314JBH.bigWig
GM12878	YY1	ENCSR000BNP	ENCFF631VCL.bigWig
GM12878	BACH1	ENCSR636MKU	ENCFF184PLB.bigWig
GM12878	RFX5	ENCSR000DZW	ENCFF972UXB.bigWig
GM12878	ATF7	ENCSR014YCR	ENCFF998ZHO.bigWig
GM12878	CBX5	ENCSR372GIN	ENCFF442AII.bigWig
GM12878	NFYB	ENCSR000DNM	ENCFF112JWF.bigWig
GM12878	ARID3A	ENCSR778UBR	ENCFF006RQH.bigWig
GM12878	JUND	ENCSR000DYS	ENCFF505IBJ.bigWig
GM12878	SMC3	ENCSR000DZP	ENCFF235BXX.bigWig
GM12878	BATF	ENCSR000BGT	ENCFF413PZT.bigWig
GM12878	NFE2	ENCSR000DZY	ENCFF684EGR.bigWig
GM12878	PBX3	ENCSR000BGR	ENCFF022SDG.bigWig
GM12878	ELF1	ENCSR841NDX	ENCFF937HON.bigWig
GM12878	ZNF592	ENCSR173ZVL	ENCFF636MWX.bigWig
GM12878	TCF12	ENCSR725VFL	ENCFF827HKI.bigWig
GM12878	BCL11A	ENCSR000BHA	ENCFF049DFX.bigWig
GM12878	RXRA	ENCSR000BJD	ENCFF899EVQ.bigWig
GM12878	RB1	ENCSR785OKZ	ENCFF487HQU.bigWig
GM12878	STAT3	ENCSR000DZV	ENCFF133SDO.bigWig
GM12878	NFYA	ENCSR000DNN	ENCFF169EJC.bigWig
GM12878	MAFK	ENCSR000DYV	ENCFF600DHH.bigWig
GM12878	ZSCAN29	ENCSR412YGM	ENCFF964JLQ.bigWig
GM12878	NFXL1	ENCSR746XEG	ENCFF502QYQ.bigWig
GM12878	MEF2A	ENCSR000BKB	ENCFF975FYL.bigWig
GM12878	ZBED1	ENCSR207PFI	ENCFF546BYE.bigWig
GM12878	ZNF207	ENCSR117KWH	ENCFF484ZSZ.bigWig
GM12878	SRF	ENCSR000BGE	ENCFF662ICX.bigWig
GM12878	SMAD5	ENCSR251OVJ	ENCFF899QCA.bigWig
GM12878	GATAD2B	ENCSR828NCB	ENCFF914CTT.bigWig
GM12878	DPF2	ENCSR509FWH	ENCFF682POX.bigWig
GM12878	ATF2	ENCSR961PPA	ENCFF618BFX.bigWig
GM12878	NR2C1	ENCSR784VIQ	ENCFF165WVA.bigWig
GM12878	ZNF217	ENCSR764CZW	ENCFF998OVR.bigWig
GM12878	ZNF687	ENCSR859FDL	ENCFF082CZO.bigWig
GM12878	GABPA	ENCSR331HPA	ENCFF529FLT.bigWig
GM12878	NR2F1	ENCSR514VYD	ENCFF653AWK.bigWig
GM12878	POLR2A	ENCSR000BGD	ENCFF368HBX.bigWig
GM12878	CTCF	ENCSR000DZN	ENCFF312KXX.bigWig
GM12878	EP300	ENCSR000DZD	ENCFF820BXH.bigWig
GM12878	ZFP36	ENCSR900XDB	ENCFF508ATZ.bigWig
GM12878	TARDBP	ENCSR412QBS	ENCFF833JIA.bigWig
GM12878	HDGF	ENCSR145XQO	ENCFF303UTJ.bigWig
GM12878	YBX1	ENCSR205SKQ	ENCFF026GPY.bigWig
GM12878	CEBPZ	ENCSR347NOB	ENCFF183UMP.bigWig
GM12878	ZNF622	ENCSR075FNZ	ENCFF085HIP.bigWig
GM12878	MAZ	ENCSR000DZA	ENCFF197TNR.bigWig
GM12878	CHD2	ENCSR000DZR	ENCFF963XEI.bigWig
GM12878	BCLAF1	ENCSR342THD	ENCFF534OEO.bigWig
GM12878	FOS	ENCSR000EYZ	ENCFF000VTD.bigWig
GM12878	MYC	ENCSR000DKU	ENCFF000ROJ.bigWig
GM12878	HDAC6	ENCSR933EYC	ENCFF449ZFX.bigWig
GM12878	SP1	ENCSR000BHK	ENCFF000OER.bigWig
GM12878	SUZ12	ENCSR091BOQ	ENCFF876VVJ.bigWig
GM12878	CREB1	ENCSR000BUF	ENCFF000NUC.bigWig
GM12878	EGR1	ENCSR000BRG	ENCFF624CPW.bigWig
GM12878	SPI1	ENCSR000BGQ	ENCFF000OBR.bigWig
GM12878	LARP7	ENCSR657PEW	ENCFF488DHD.bigWig
GM12878	NKRF	ENCSR732PJX	ENCFF410LVR.bigWig

## Sheet: WGBS
Sample	ENCODE Experiment ID	Sequencing File
K562	ENCSR765JPC	ENCFF413KHN.fastq.gz
K562	ENCSR765JPC	ENCFF567DAI.fastq.gz
K562	ENCSR765JPC	ENCFF336KJH.fastq.gz
K562	ENCSR765JPC	ENCFF585HYM.fastq.gz
GM12878	ENCSR890UQO	ENCFF798RSS.fastq.gz
GM12878	ENCSR890UQO	ENCFF113KRQ.fastq.gz
GM12878	ENCSR890UQO	ENCFF585BXF.fastq.gz
GM12878	ENCSR890UQO	ENCFF851HAT.fastq.gz
