# Supplementary material for: Genome-wide analysis of polymerase III–transcribed Alu elements suggests cell-type–specific enhancer function
Source: HighWire-hosted journal article supplement (doi:10.1101/gr.249789.119), 2019-08-14
Supplement: Supplemental_Table_S2.xlsx [file Supplemental_Table_S2.xlsx]

## Sheet: Table Legend
Supplemental Table S2. Summary of expressed Alu elements identified in this study.

## Sheet: RAMPAGE_Alu (hg19)
Sample	Peak Chrom	Peak Start	Peak End	Peak Strand	Peak Site	Height	Peak Reads	Total Reads	RPM	Entropy	Positions of R2	Alu Chrom	Alu Start	Alu End	Alu Name	Alu Strand
A172	chr10	103929447	103929456	+	103929452	11	12	16	1.16858	2.78064	103929672|103929801|103929610|103929745|103929798|103929627|103929639|103929746|103929747	chr10	103929452	103929749	AluY	+
A172	chr10	43667097	43667098	-	43667097	13	13	13	0.949474	3.39275	43666919|43666926|43666927|43666795|43666807|43666917|43666914|43666832|43666802|43666801|43666916	chr10	43666800	43667098	AluSx	-
A172	chr10	69524852	69524857	+	69524852	9	9	11	0.803401	3.27761	69525280|69525206|69525220|69525218|69525204|69525195|69525207|69525223|69525205|69525224	chr10	69524852	69525156	AluY	+
A172	chr10	69615451	69615452	-	69615451	14	14	14	1.02251	2.61058	69615026|69615179|69615059|69614809|69615025|69615028|69615027	chr10	69615150	69615452	AluSp	-
A172	chr10	77863526	77863527	+	77863526	14	14	14	1.02251	2.64559	77863869|77863870|77863990|77863868|77863946|77863871|77863820	chr10	77863526	77863820	AluSg7	+
A172	chr10	91313483	91313484	+	91313483	13	13	13	0.949474	3.2389	91313810|91313850|91313854|91313785|91313859|91313769|91313805|91313765|91313855|91313846	chr10	91313483	91313753	AluSg7	+
A172	chr10	92902052	92902053	+	92902052	12	12	12	0.876437	2.85539	92902347|92902156|92902348|92902350|92902357|92902337|92902344|92902343	chr10	92902052	92902366	AluSx	+
A172	chr1	115248306	115248417	-	115248337	14	16	37	2.70235	3.86383	115248091|115247743|115247978|115247787|115247681|115247684|115247855|115247742|115247865|115248089|115247857|115247854|115248087|115248085|115247762|115247949|115248086|115248090	chr1	115248250	115248409	AluSx3	-
A172	chr11	27180432	27180437	-	27180436	22	23	27	1.97198	3.45404	27180266|27180107|27180254|27180189|27180191|27180117|27180297|27180103|27180255|27180118|27180140|27180299|27180141|27180281	chr11	27180304	27180437	AluY	-
A172	chr1	145398719	145398730	+	145398719	41	41	50	3.65182	3.63327	145399009|145399096|145399086|145399095|145399293|145399072|145399079|145399084|145399098|145399081|145399094|145399077|145399097|145399045|145399078	chr1	145398719	145399016	AluSq	+
A172	chr1	148874427	148874428	+	148874427	10	10	10	0.730364	2.84644	148874747|148874808|148874827|148874807|148874845|148874744|148874810|148874795	chr1	148874427	148874735	AluSx	+
A172	chr1	155278157	155278158	-	155278157	40	40	40	2.92146	3.21929	155277760|155277759|155277641|155277767|155277765|155277989|155277764|155277782|155277779|155277761|155277770|155277772|155277755|155277733|155277771	chr1	155277846	155278157	AluSx3	-
A172	chr1	160259668	160259681	-	160259674	3	5	9	0.657328	2.9477	160259143|160259204|160259147|160259430|160259149|160259141|160258927|160259148	chr1	160259378	160259680	AluSz6	-
A172	chr1	161085141	161085153	-	161085152	12	13	14	1.02251	3.23593	161084863|161084865|161084717|161084968|161084984|161084859|161084956|161084862|161084691|161084742	chr1	161084850	161085153	AluSx1	-
A172	chr11	61938749	61938750	-	61938749	10	10	10	0.730364	2.52193	61938428|61938431|61938432|61938406|61938430|61938477	chr11	61938440	61938749	AluSx	-
A172	chr12	120320537	120320542	+	120320537	14	14	27	1.97198	3.92657	120321030|120320927|120320900|120320872|120320909|120320876|120320881|120320883|120321059|120320882|120320875|120320850|120321006|120321022|120321009|120320879|120320877|120320874	chr12	120320537	120320845	AluY	+
A172	chr12	120379018	120379019	+	120379018	145	145	150	10.9555	3.35406	120379205|120379349|120379347|120379361|120379340|120379346|120379344|120379341|120379336|120379339|120379326|120379348|120379199|120379372|120379345|120379338|120379155|120379343|120379316	chr12	120379020	120379316	AluSq	+
A172	chr12	121789559	121789560	-	121789559	20	20	20	1.46073	3.38418	121789423|121789251|121789254|121789260|121789266|121789253|121789222|121789291|121789267|121789262|121789386|121789384	chr12	121789266	121789559	AluSx3	-
A172	chr12	19152770	19152771	-	19152770	14	14	14	1.02251	3.23593	19152469|19152163|19152336|19152468|19152347|19152320|19152423|19152475|19152337|19152343	chr12	19152460	19152770	AluSg	-
A172	chr1	224380514	224380523	+	224380521	7	8	12	0.876437	2.91398	224380923|224381063|224380932|224380921|224380924|224381091|224381076|224381064	chr1	224380474	224380793	AluSx	+
A172	chr1	228291136	228291218	+	228291189	8	8	42	3.06753	3.97449	228292300|228291832|228291797|228291601|228291801|228291803|228291854|228291798|228291578|228291849|228291852|228292064|228291599|228291791|228291793|228291796|228291621|228291620|228292299|228291611|228291851	chr1	228291219	228291508	AluSz	+
A172	chr12	31641207	31641208	-	31641207	19	19	21	1.53377	3.03112	31640891|31640931|31640848|31640886|31640885|31640888|31640882|31640847|31640845|31640884	chr12	31640888	31641206	AluSz	-
A172	chr1	231701161	231701190	+	231701189	3	4	8	0.584292	2.75	231701781|231701920|231701584|231701592|231701936|231701591|231701585	chr1	231701189	231701495	AluSg	+
A172	chr1	236653482	236653483	+	236653482	8	8	8	0.584292	2.75	236653975|236653820|236653952|236653650|236653834|236653953|236653977	chr1	236653482	236653799	AluSg	+
A172	chr1	24842352	24842353	+	24842352	61	61	61	4.45522	4.0282	24842645|24842702|24842640|24842817|24842701|24842641|24842674|24842649|24842713|24842828|24842777|24842700|24842820|24842926|24842779|24842668|24842667|24842778|24842819|24842821|24842829|24842698|24842773|24842699	chr1	24842352	24842657	AluSg	+
A172	chr12	87551830	87551842	+	87551830	10	10	12	0.876437	2.58496	87552134|87552083|87552131|87552089|87552130|87552087|87552139	chr12	87551831	87552137	AluSp	+
A172	chr13	45904145	45904146	+	45904145	11	11	11	0.803401	2.84535	45904528|45904591|45904535|45904436|45904442|45904766|45904530|45904319	chr13	45904145	45904442	AluSx1	+
A172	chr14	23399941	23399942	+	23399941	58	60	61	4.45522	3.89864	23400278|23400214|23400215|23400222|23400205|23400276|23400217|23400321|23400109|23400218|23400225|23400417|23400220|23400212|23400213|23400223|23400283|23400211|23400216|23400208|23400210|23400228	chr14	23399941	23400208	AluSq	+
A172	chr1	44538079	44538080	+	44538079	8	8	8	0.584292	3	44538422|44538504|44538498|44538403|44538423|44538591|44538527|44538283	chr1	44538080	44538197	AluJb	+
A172	chr14	69931931	69931932	+	69931931	8	8	8	0.584292	2.5	69932383|69932247|69932211|69932378|69932544|69932362	chr14	69931931	69932218	AluSz6	+
A172	chr1	48662020	48662021	-	48662020	152	153	153	11.1746	3.93971	48661863|48661878|48661869|48661872|48661877|48661870|48661876|48661879|48661871|48661881|48661880|48661868|48661873|48661895|48661867|48661866|48661882|48661874|48661875	chr1	48661883	48662019	FLAM_C	-
A172	chr14	93618097	93618098	-	93618097	14	14	14	1.02251	2.84237	93617780|93617712|93617642|93617663|93617641|93617779|93617713|93617711	chr14	93617787	93618096	AluSz6	-
A172	chr15	32993582	32993583	-	32993582	10	10	10	0.730364	2.64644	32993050|32993207|32993244|32993242|32993202|32993260|32993406	chr15	32993284	32993582	AluY	-
A172	chr1	53299627	53299628	+	53299627	9	9	9	0.657328	2.72548	53299993|53299932|53299992|53299953|53299995|53299931|53299934	chr1	53299628	53299936	AluSx3	+
A172	chr15	51177775	51177776	+	51177775	22	23	24	1.75287	3.48171	51178315|51178306|51178311|51178153|51178295|51178308|51178219|51178296|51178313|51178312|51178309|51178289|51178279	chr15	51177775	51178073	AluSc5	+
A172	chr15	80303584	80303585	+	80303584	11	11	11	0.803401	2.66353	80303894|80303890|80303886|80303966|80303883|80303926|80303888	chr15	80303584	80303888	AluSq2	+
A172	chr15	85260251	85260252	-	85260251	24	25	25	1.82591	4.00163	85259764|85259990|85259907|85259892|85259877|85259993|85259901|85259948|85259939|85259994|85259885|85259964|85259803|85259774|85259986|85259973|85259984	chr15	85259949	85260252	AluSx	-
A172	chr15	90025466	90025469	-	90025466	9	9	14	1.02251	3.23593	90025080|90025087|90025008|90025081|90024914|90024991|90025088|90025017|90025047|90025084	chr15	90025336	90025467	AluSp	-
A172	chr16	28814716	28814717	-	28814716	12	12	12	0.876437	2.62581	28814408|28814406|28814402|28814400|28814410|28814404|28814403	chr16	28814434	28814715	AluSx	-
A172	chr16	3313661	3313667	-	3313666	16	16	18	1.31466	3.26633	3313454|3313414|3313413|3313369|3313412|3313359|3313352|3313366|3313365|3313417|3313382	chr16	3313366	3313666	AluSg	-
A172	chr16	56688177	56688178	-	56688177	12	12	12	0.876437	3.4183	56687752|56687910|56687878|56687893|56687810|56687914|56687921|56687912|56687909|56687994|56687795	chr16	56687876	56688178	AluY	-
A172	chr16	84915383	84915384	-	84915383	6	6	6	0.438219	2.58496	84914976|84914974|84915219|84914977|84915218|84915097	chr16	84915246	84915381	AluJo	-
A172	chr17	1368351	1368352	-	1368351	8	8	9	0.657328	2.75	1367885|1367852|1367853|1368008|1367889|1367854|1367530	chr17	1368106	1368405	AluSx	-
A172	chr17	17826426	17826434	+	17826429	15	15	19	1.38769	3.72161	17826753|17826721|17826730|17826735|17826757|17826748|17826802|17826732|17826718|17826755|17826749|17826716|17826799|17826537	chr17	17826429	17826716	AluSq2	+
A172	chr17	19585395	19585396	+	19585395	14	14	14	1.02251	2.89629	19585657|19585663|19585656|19585666|19585659|19585661|19585664|19585660|19585665	chr17	19585396	19585638	AluSz	+
A172	chr17	30424486	30424487	-	30424486	24	24	24	1.75287	3.88684	30424233|30424195|30424219|30424229|30424225|30424383|30424202|30424230|30424203|30424201|30424228|30424190|30424227|30424204|30424194|30424232	chr17	30424175	30424487	AluY	-
A172	chr17	40555225	40555408	-	40555395	9	9	79	5.76988	5.35082	40554527|40555056|40555131|40554858|40555119|40555128|40554791|40555058|40555004|40555082|40555051|40554938|40554714|40555116|40554860|40554940|40555120|40554868|40555067|40554815|40554816|40555023|40554834|40554741|40554501|40555025|40554500|40555121|40555150|40554498|40555054|40555059|40554814|40554497|40554924|40554798|40554561|40554739|40554499|40554817|40555024|40554918|40554504|40554788|405…	chr17	40555091	40555246	AluJr	-
A172	chr17	40555957	40555958	-	40555957	15	15	15	1.09555	3.37356	40555609|40555386|40555610|40555486|40555639|40555606|40555644|40555715|40555409|40555599|40555607	chr17	40555639	40555958	AluSx	-
A172	chr17	40676458	40676459	+	40676458	12	12	12	0.876437	3.4183	40676764|40677074|40677180|40676949|40676910|40676719|40676758|40677006|40676767|40676783|40676913	chr17	40676459	40676756	AluY	+
A172	chr17	47647376	47647380	-	47647379	11	11	13	0.949474	2.62352	47647047|47647056|47647071|47647077|47646994|47647044|47647018	chr17	47647071	47647376	AluSx	-
A172	chr17	58682467	58682468	-	58682467	44	45	46	3.35968	2.74573	58682232|58682131|58682128|58682229|58682130|58682228|58682225|58682129|58682127|58682133|58682126	chr17	58682167	58682468	AluSz	-
A172	chr17	8149922	8149927	+	8149922	9	9	15	1.09555	3.03915	8150239|8150234|8150227|8150232|8150228|8150237|8150229|8150230|8150226	chr17	8149922	8150225	AluSc5	+
A172	chr18	20760183	20760184	-	20760183	13	13	13	0.949474	3.2389	20759850|20759814|20759774|20759769|20759887|20759788|20759786|20759835|20759787|20759816	chr18	20759870	20760184	AluY	-
A172	chr18	23748682	23748769	-	23748768	3	3	18	1.31466	2.55773	23748420|23748421|23748414|23748419|23748411|23748417|23748413	chr18	23748536	23748657	FLAM_A	-
A172	chr18	64289290	64289291	+	64289290	66	66	66	4.82041	3.02538	64289478|64289473|64289474|64289475|64289462|64289471|64289468|64289469|64289477|64289437|64289472|64289458|64289463|64289476	chr18	64289291	64289427	FLAM_C	+
A172	chr19	2461780	2461785	-	2461784	29	31	36	2.62931	2.64941	2461483|2461478|2461482|2461455|2461490|2461495|2461494|2461481	chr19	2461494	2461785	AluSx	-
A172	chr19	43668259	43668260	+	43668259	36	36	36	2.62931	3.35093	43668573|43668431|43754108|43668571|43668576|43668568|43668553|43668432|43668575|43668570|43668577|43668362	chr19	43668260	43668553	AluSq	+
A172	chr19	4838682	4838810	-	4838747	11	14	50	3.65182	3.04625	4838364|4838370|4838371|4838365|4838367|4838363|4838426|4838366|4838368|4838369|4838443	chr19	4838584	4838892	AluSq2	-
A172	chr19	50602343	50602344	-	50602343	22	22	24	1.75287	2.58288	50602196|50602132|50602130|50602117|50602121|50602128|50602120|50602129	chr19	50602212	50602344	AluYa5	-
A172	chr19	50640579	50640584	-	50640583	45	45	52	3.7979	3.5995	50640369|50640361|50640399|50640367|50640370|50640364|50640358|50640362|50640371|50640368|50640315|50640372|50640365|50640363|50640360|50640366	chr19	50640452	50640584	AluYa5	-
A172	chr19	54511330	54511331	+	54511330	47	47	47	3.43271	4.05876	54511648|54511841|54511834|54511658|54511667|54511622|54511782|54511846|54511620|54511656|54511633|54511655|54511839|54511842|54511615|54511614|54511650|54511844|54511651|54511662|54511634|54511845	chr19	54511330	54511621	AluSx1	+
A172	chr19	611863	611864	+	611863	24	24	24	1.75287	3.47018	612322|612301|612242|612326|612262|612321|612292|612298|612269|612290|612302|612319|612300	chr19	611863	612167	AluSx1	+
A172	chr20	8731889	8731890	-	8731889	10	10	10	0.730364	2.92193	8731632|8731611|8731603|8731628|8731617|8731602|8731607|8731685	chr20	8731580	8731890	AluY	-
A172	chr2	10257611	10257612	-	10257611	6	6	6	0.438219	2.58496	10257298|10257285|10257290|10257288|10257291|10257287	chr2	10257297	10257612	AluY	-
A172	chr21	30604165	30604171	-	30604165	48	48	56	4.09004	3.06786	30603803|30603808|30603806|30603807|30603817|30603815|30603809|30603805|30603814|30603812|30603823|30603818	chr21	30603872	30604165	AluSc	-
A172	chr21	46189514	46189588	-	46189586	4	5	22	1.6068	3.26558	46189131|46189120|46189203|46188966|46189126|46189247|46189177|46189224|46189202|46189219|46189222|46189125	chr21	46189293	46189592	AluY	-
A172	chr2	170676764	170676765	-	170676764	71	71	74	5.4047	3.48623	170676480|170676459|170676456|170676482|170676453|170676462|170676571|170676450|170676461|170676409|170676458|170676502|170676520|170676478|170676454|170676481	chr2	170676480	170676765	AluSp	-
A172	chr2	178261963	178261964	-	178261963	7	7	7	0.511255	2.52164	178261597|178261558|178261679|178261633|178261667|178261557	chr2	178261656	178261964	AluSg4	-
A172	chr21	9971150	9971151	+	9971150	8	9	9	0.657328	2.5	9971624|9971620|9971591|9971473|9971629|9971610	chr21	9971151	9971464	AluY	+
A172	chr2	208966571	208966575	-	208966574	5	5	8	0.584292	2.52164	208966222|208966224|208966181|208966223|208966178|208966228	chr2	208966263	208966572	AluSx3	-
A172	chr2	216298542	216298543	+	216298542	9	9	9	0.657328	2.72548	216298874|216298863|216298861|216298862|216298866|216298864|216298848	chr2	216298542	216298852	AluSx	+
A172	chr22	22929654	22929655	+	22929654	23	23	25	1.82591	2.9735	22929992|22929988|22930028|22930035|22930029|22930034|22930030|22930027|22930050|22929914	chr22	22929654	22929945	AluSc5	+
A172	chr22	29997475	29997476	-	29997475	68	68	72	5.25862	4.41165	29997144|29997149|29997142|29997296|29997124|29997117|29997093|29997126|29997131|29997113|29997150|29997143|29997152|29997145|29997169|29997185|29997156|29997158|29997157|29997141|29997154|29997151|29997140|29997127|29997148|29997191|29997135	chr22	29997179	29997475	AluY	-
A172	chr22	30709688	30709689	-	30709688	8	8	8	0.584292	2.75	30709366|30709372|30709469|30709348|30709376|30709346|30709349	chr22	30709377	30709689	AluSc8	-
A172	chr2	234397278	234397279	+	234397278	30	30	30	2.19109	3.89474	234397593|234397560|234397561|234397566|234397598|234397600|234397559|234397576|234397570|234397584|234397556|234397575|234397592|234397595|234397594|234397569|234397628	chr2	234397278	234397584	AluJr	+
A172	chr2	23503596	23503597	+	23503596	9	9	9	0.657328	2.72548	23503901|23503918|23503913|23503916|23504015|23503856|23503817	chr2	23503596	23503907	AluSg	+
A172	chr22	37045631	37045651	-	37045631	22	22	25	1.82591	4.16386	37045078|37045343|37045312|37045132|37045332|37045342|37045136|37045138|37045079|37045074|37045141|37045459|37045087|37045072|37045464|37045143|37045104|37045465|37045084	chr22	37045342	37045632	AluSx3	-
A172	chr22	42068335	42068340	+	42068335	12	12	15	1.09555	2.89629	42068775|42068641|42068544|42068628|42068774|42068844|42068823|42068731	chr22	42068335	42068629	AluSg	+
A172	chr2	27185027	27185028	+	27185027	30	30	30	2.19109	3.76141	27185209|27185324|27185301|27185291|27185342|27185312|27185344|27185337|27185326|27185340|27185327|27185345|27185341|27185211|27185299|27185303|27185346	chr2	27185028	27185339	AluY	+
A172	chr2	54271449	54271450	+	54271449	12	12	12	0.876437	3.02205	54271877|54271835|54271848|54271850|54271852|54271854|54271858|54271783|54271786	chr2	54271449	54271723	AluSz6	+
A172	chr2	65794640	65794645	+	65794640	19	19	22	1.6068	3.51603	65794969|65794830|65794778|65794820|65794829|65794834|65794828|65794850|65794831|65794819|65794832|65794821|65794827	chr2	65794640	65794929	AluY	+
A172	chr2	70954744	70954745	+	70954744	10	10	11	0.803401	2.64644	70955083|70955059|70955086|70955080|70955142|70955082|70955074	chr2	70954744	70955067	AluSz	+
A172	chr2	87449318	87449319	-	87449318	9	9	9	0.657328	2.50326	87448951|87448883|87448902|87448957|87448894|87448916	chr2	87449010	87449319	AluSg4	-
A172	chr3	128399477	128399482	-	128399477	75	75	97	7.08453	4.88893	128399325|128399206|128399270|128398989|128399140|128399207|128399148|128399007|128399150|128398861|128399015|128398877|128399146|128399141|128399151|128399133|128399145|128399205|128398878|128398873|128399142|128399018|128399269|128398956|128399283|128399154|128399149|128399264|128399164|128399139|128399143|128399153|128399214|128398958|128399210	chr3	128399192	128399478	AluSg	-
A172	chr3	139109298	139109299	+	139109298	31	31	32	2.33717	3.99373	139109473|139109725|139109668|139109655|139109653|139109708|139109666|139109652|139109673|139109665|139109669|139109706|139109705|139109583|139109662|139109654|139109587|139109710	chr3	139109299	139109588	AluSx1	+
A172	chr3	150062888	150062890	-	150062888	29	35	36	2.62931	3.27869	150062754|150062557|150062559|150062584|150062582|150062573|150062570|150062563|150062558|150062597|150062586|150062569|150062581	chr3	150062579	150062889	AluSq2	-
A172	chr3	15429916	15429917	-	15429916	19	19	19	1.38769	2.71312	15429632|15429616|15429613|15429601|15429579|15429614|15429607|15429617|15429577	chr3	15429635	15429917	AluSq2	-
A172	chr3	190142437	190142439	+	190142438	242	267	270	19.7198	4.89254	190142619|190142603|190142773|190142587|190142776|190142772|190142769|190142775|190142751|190142586|190142589|190142777|190142718|190142760|190142584|190142580|190142782|190142762|190142855|190142653|190142752|190142765|190142758|190142749|190142847|190142771|190142569|190142759|190142711|190142763|190142735|190142604|190142716|190142717|190142781|190142767|190142770|190142761|190142578|190142768…	chr3	190142438	190142703	AluSx1	+
A172	chr3	196354676	196354677	-	196354676	10	10	10	0.730364	2.52193	196354479|196354474|196354244|196354249|196354475|196354461	chr3	196354371	196354676	AluSc	-
A172	chr3	23989326	23989327	+	23989326	24	24	24	1.75287	3.72018	23989586|23989574|23989623|23989505|23989583|23989588|23989570|23989622|23989578|23989579|23989581|23989575|23989572|23989573|23989590	chr3	23989326	23989623	AluSq2	+
A172	chr3	45036768	45036774	-	45036773	49	53	55	4.017	2.97832	45036466|45036486|45036465|45036473|45036475|45036472|45036470|45036464|45036471|45036483|45036469	chr3	45036470	45036774	AluSp	-
A172	chr3	45754018	45754028	-	45754027	24	28	30	2.19109	3.41404	45753675|45753667|45753678|45753674|45753676|45753670|45753680|45753693|45753671|45753679|45753677|45753668	chr3	45753732	45754027	AluSz6	-
A172	chr4	141011921	141011923	+	141011922	10	13	14	1.02251	3.18083	141012226|141012256|141012106|141012231|141012240|141012330|141012338|141012213|141012331|141012229	chr4	141011922	141012232	AluSz	+
A172	chr4	174365423	174365424	-	174365423	49	49	49	3.57879	4.39278	174365115|174365117|174365150|174365138|174365107|174365041|174365097|174365139|174365108|174365123|174365110|174365119|174365095|174365122|174365126|174365099|174365140|174365113|174365124|174365112|174365105|174365109|174365120|174365111	chr4	174365139	174365424	AluSq2	-
A172	chr5	149925852	149925853	-	149925852	15	15	16	1.16858	3.05656	149925409|149925312|149925495|149925513|149925403|149925511|149925317|149925363|149925410	chr5	149925551	149925856	AluSg	-
A172	chr5	173191436	173191437	-	173191436	19	19	19	1.38769	3.43162	173191046|173191032|173191099|173191230|173191188|173191048|173191004|173191097|173191050|173191043|173191045|173191010	chr5	173191141	173191437	AluSp	-
A172	chr5	179235535	179235536	+	179235535	12	13	13	0.949474	2.62581	179235768|179235777|179235717|179235630|179235774|179235772|179235697	chr5	179235535	179235731	AluSc8	+
A172	chr5	180634126	180634136	+	180634132	6	6	12	0.876437	2.66353	180634407|180634309|180634300|180634369|180634304|180634362|180634410	chr5	180634127	180634394	AluSg	+
A172	chr5	20720245	20720246	+	20720245	41	41	43	3.14057	3.97329	20720665|20720502|20720563|20720561|20720567|20720554|20720784|20720572|20720528|20720678|20720574|20720569|20720552|20720351|20720568|20720535|20720560|20720562|20720566|20720661	chr5	20720246	20720554	AluSc8	+
A172	chr5	24729176	24729177	+	24729176	14	14	14	1.02251	2.84237	24729493|24729494|24729518|24729496|24729551|24729531|24729495|24729553	chr5	24729176	24729476	AluY	+
A172	chr5	37285156	37285170	+	37285159	11	11	15	1.09555	3.32323	37285449|37285459|37285446|37285450|37285548|37285443|37285677|37285448|37285520|37285440|37285518	chr5	37285159	37285418	AluSq10	+
A172	chr5	42993327	42993450	-	42993439	12	12	45	3.28664	4.37765	42993024|42993032|42993008|42993031|42993025|42992920|42993000|42993253|42993033|42993019|42992996|42993027|42993011|42993006|42992967|42992847|42992997|42993035|42992954|42992998|42993026|42993028|42993004|42993017|42993030	chr5	42993009	42993319	AluSx4	-
A172	chr5	68780956	68780957	+	68780956	8	8	8	0.584292	2.5	68781379|68781253|68781330|68781273|68781271|68781274	chr5	68780956	68781273	AluJo	+
A172	chr5	76035084	76035085	+	76035084	16	16	17	1.24162	3.45282	76035346|76035376|76035281|76035352|76035381|76035303|76035422|76035331|76035340|76035384|76035322|76035350	chr5	76035084	76035385	AluSq2	+
A172	chr5	76355965	76355969	-	76355965	9	9	11	0.803401	2.55034	76355666|76355647|76355631|76355635|76355594|76355634|76355629	chr5	76355667	76355966	AluSg	-
A172	chr5	79922835	79923143	-	79922936	23	29	237	17.3096	3.55991	79922650|79922586|79922630|79922589|79922643|79922399|79922828|79922829|79922640|79922641|79922647|79922637|79922634|79922631|79922633|79922636|79922827|79922639|79922632|79922644|79922635|79922642|79922638	chr5	79922755	79922876	FLAM_A	-
A172	chr5	79923428	79923482	-	79923457	2	2	8	0.584292	2.52164	79923066|79922828|79923262|79922823|79922835|79922643	chr5	79923178	79923449	AluJb	-
A172	chr5	88271358	88271359	+	88271358	19	19	19	1.38769	2.52399	88271520|88271519|88271522|88271523|88271516|88271509|88271521|88271518	chr5	88271358	88271526	FLAM_C	+
A172	chr6	111022127	111022128	+	111022127	87	87	88	6.42721	4.3888	111022389|111022557|111022491|111022568|111022493|111022821|111022562|111022587|111022796|111022658|111022446|111022464|111022522|111022466|111022232|111022440|111022384|111022428|111022564|111022569|111022405|111022383|111022437|111022558|111022656|111022566|111022675|111022309|111022567|111022431|111022382|111022565|111022391|111022430|111022507|111022231	chr6	111022127	111022414	AluSg4	+
A172	chr6	122765459	122765562	-	122765459	6	6	28	2.04502	4.1623	122765137|122765122|122765132|122765136|122765096|122765142|122765285|122765032|122764579|122765098|122764576|122765031|122765131|122764581|122764580|122765121|122765141|122765134|122765135|122765120	chr6	122765165	122765430	AluJb	-
A172	chr6	12492660	12492661	-	12492660	8	8	8	0.584292	2.5	12492346|12492279|12492281|12492276|12492282|12492291	chr6	12492345	12492661	AluY	-
A172	chr6	139335707	139335708	+	139335707	8	8	8	0.584292	2.5	139336014|139336010|139336016|139336031|139336006|139336020	chr6	139335707	139335984	AluSg	+
A172	chr6	158429303	158429304	-	158429303	8	8	8	0.584292	2.5	158429146|158429156|158429155|158429154|158429152|158429143	chr6	158428999	158429304	AluSx	-
A172	chr6	21163899	21163900	+	21163899	49	49	52	3.7979	4.38535	21164145|21164140|21164213|21164114|21164134|21164162|21164163|21164152|21164146|21164184|21164191|21164192|21164138|21164148|21164001|21164195|21164193|21164139|21164259|21164257|21164199|21164149|21164180|21164144|21164143|21164151	chr6	21163899	21164210	AluSq2	+
A172	chr6	26273743	26273744	+	26273743	12	12	12	0.876437	3.08496	26274149|26274033|26273888|26274010|26274113|26274150|26274013|26274151|26274011	chr6	26273743	26274032	AluSq2	+
A172	chr6	28720177	28720178	+	28720177	8	8	8	0.584292	3	28720501|28720489|28720502|28720487|28720482|28720500|28720495|28720496	chr6	28720177	28720480	AluSx	+
A172	chr6	28805596	28805601	+	28805600	7	7	10	0.730364	2.92193	28805772|28805883|28805898|28805794|28805773|28805774|28805897|28805777	chr6	28805596	28805897	AluY	+
A172	chr6	28812738	28812739	+	28812738	8	8	8	0.584292	2.5	28813077|28813064|28813057|28813084|28813080|28813088	chr6	28812740	28813038	AluSx3	+
A172	chr6	28904005	28904006	-	28904005	12	12	13	0.949474	2.68872	28903667|28903702|28903654|28903749|28903658|28903657|28903701	chr6	28903739	28904006	AluJb	-
A172	chr6	30593528	30593606	+	30593586	10	10	53	3.87093	3.36029	30593971|30593906|30594030|30593895|30593908|30593901|30593907|30593890|30593974|30593905|30593902|30593887|30593888|30593899|30593889|30593988	chr6	30593595	30593888	AluJb	+
A172	chr6	3069964	3069965	+	3069964	11	11	11	0.803401	2.66353	3070265|3070262|3070254|3070277|3070328|3070260|3070264	chr6	3069964	3070266	AluSx1	+
A172	chr6	4984927	4984928	-	4984927	293	300	302	22.057	5.69192	4984428|4984584|4984634|4984626|4984578|4984644|4984641|4984704|4984463|4984599|4984629|4984612|4984628|4984640|4984625|4984623|4984615|4984456|4984621|4984603|4984443|4984596|4984420|4984724|4984638|4984586|4984580|4984610|4984429|4984457|4984598|4984576|4984618|4984425|4984432|4984620|4984585|4984668|4984619|4984642|4984557|4984601|4984574|4984631|4984423|4984624|4984633|4984431|4984597|4984627…	chr6	4984620	4984928	AluY	-
A172	chr7	100101495	100101496	+	100101495	10	10	10	0.730364	2.52193	100101868|100101876|100101873|100101872|100101866|100101870	chr7	100101495	100101803	AluJr	+
A172	chr7	100628439	100628440	-	100628439	62	63	63	4.6013	4.49015	100628313|100628142|100627897|100628111|100628126|100627896|100628146|100628138|100628053|100627904|100628128|100628092|100627968|100628140|100627927|100628143|100628139|100628150|100627933|100628151|100628124|100627976|100628127|100628141|100627918|100628173|100628145|100627958|100627886|100628131|100627895	chr7	100628150	100628440	AluSx1	-
A172	chr7	101452754	101452755	-	101452754	6	6	6	0.438219	2.58496	101452493|101452460|101452402|101452462|101452576|101452461	chr7	101452447	101452755	AluSq	-
A172	chr7	1238778	1238779	-	1238778	24	24	24	1.75287	3.75163	1238451|1238438|1238441|1238413|1238443|1238436|1238417|1238421|1238429|1238425|1238435|1238437|1238426|1238433|1238432	chr7	1238493	1238779	AluSx	-
A172	chr7	130850243	130850244	-	130850243	11	11	11	0.803401	2.91398	130849924|130850007|130849938|130849934|130849912|130849932|130849921|130849913	chr7	130849944	130850243	AluSx3	-
A172	chr7	140311758	140311769	+	140311758	55	56	60	4.38219	4.07297	140312151|140312065|140312147|140312051|140312154|140312048|140312199|140312113|140312155|140312047|140312149|140312060|140312152|140312150|140312198|140312129|140312146|140312059|140312153|140312057|140312139	chr7	140311758	140312065	AluSx	+
A172	chr7	149366384	149366387	-	149366384	20	20	27	1.97198	3.48468	149366081|149366084|149366085|149366082|149366042|149365988|149366086|149366083|149366080|149366087|149366051|149366075|149366079	chr7	149366079	149366385	AluSz	-
A172	chr7	28846783	28846784	+	28846783	152	156	156	11.3937	3.43536	28847126|28847120|28847124|28847123|28847122|28847110|28847109|28847116|28847125|28847127|28847119|28847128|28847129|28847121|28847118	chr7	28846783	28847080	AluSg4	+
A172	chr7	68678946	68678947	-	68678946	61	61	61	4.45522	3.99415	68678787|68678458|68678475|68678594|68678515|68678509|68678593|68678514|68678482|68678454|68678477|68678510|68678597|68678601|68678474|68678472|68678473|68678492|68678694|68678592|68678775	chr7	68678648	68678947	AluSg	-
A172	chr7	73548071	73548077	-	73548076	14	15	18	1.31466	3.46132	73547763|73547762|73547754|73547756|73547758|73547757|73547753|73547723|73547755|73547765|73547759|73547761	chr7	73547792	73548076	AluSz	-
A172	chr7	76058297	76058298	-	76058297	30	30	31	2.26413	3.77775	76057944|76057966|76058041|76057912|76057992|76057997|76058006|76057930|76057994|76057969|76057990|76057914|76057925|76057890|76057999|76058004	chr7	76057989	76058298	AluSq	-
A172	chr7	82356478	82356479	+	82356478	14	14	14	1.02251	3.18201	82356913|82356915|82356919|82356916|82356909|82356917|82356914|82356912|82356918|82356910	chr7	82356478	82356777	AluY	+
A172	chr8	141501953	141501954	+	141501953	35	35	36	2.62931	3.65758	141502252|141502306|141502280|141502250|141502242|141502404|141502246|141502381|141502260|141502272|141502251|141502245|141502274|141502247|141502262	chr8	141501956	141502255	AluSz	+
A172	chr8	141656256	141656257	+	141656256	40	40	40	2.92146	3.60016	141656517|141656392|141656518|141656432|141656441|141656393|141656522|141656434|141656431|141656520|141656433|141656524|141656440|141656525|141656361	chr8	141656256	141656558	AluY	+
A172	chr8	144536879	144536880	-	144536879	40	40	40	2.92146	3.94145	144536737|144536252|144536699|144536698|144536532|144536533|144536760|144536693|144536700|144536758|144536518|144536683|144536479|144536519|144536736|144536707|144536454|144536253|144536701|144536477|144536690	chr8	144536572	144536880	AluY	-
A172	chr8	1727710	1727711	-	1727710	13	14	14	1.02251	3.39275	1727454|1727337|1727339|1727500|1727491|1727370|1727490|1727338|1727470|1727368|1727471	chr8	1727405	1727710	AluSz	-
A172	chr8	33076412	33076413	-	33076412	10	10	10	0.730364	2.92193	33075954|33076211|33076067|33076070|33076045|33076061|33076062|33076091	chr8	33076079	33076413	AluSq2	-
A172	chr8	42365395	42365396	+	42365395	18	18	18	1.31466	3.15522	42365727|42365816|42365742|42365820|42365725|42365821|42365822|42365739|42365741|42365819	chr8	42365395	42365700	AluSx	+
A172	chr8	42575556	42575557	-	42575556	10	10	10	0.730364	3.12193	42574982|42575382|42575215|42575458|42575175|42575452|42575374|42575216|42575151	chr8	42575258	42575556	AluSc	-
A172	chr9	100640117	100640118	+	100640117	14	14	14	1.02251	3.32486	100640412|100640480|100640476|100640407|100640471|100640470|100640484|100640479|100640409|100640475|100640408	chr9	100640117	100640424	AluSg	+
A172	chr9	110396489	110396491	+	110396490	5	7	7	0.511255	2.52164	110396777|110396663|110396761|110396772|110396776|110396771	chr9	110396490	110396769	AluSx4	+
A172	chr9	126147740	126147741	-	126147740	17	17	17	1.24162	3.45482	126147442|126147492|126147299|126147390|126147279|126147278|126147391|126147395|126147408|126147284|126147450|126147326	chr9	126147440	126147741	AluSq2	-
A172	chr9	128546702	128546707	-	128546706	6	7	10	0.730364	2.64644	128546377|128546399|128546404|128546382|128546375|128546378|128546376	chr9	128546406	128546707	AluSx	-
A172	chr9	130769059	130769060	-	130769059	10	10	11	0.803401	2.64644	130768699|130768697|130768729|130768701|130768693|130768698|130768700	chr9	130768763	130769060	AluJb	-
A172	chr9	139956891	139956978	-	139956977	28	28	74	5.4047	3.52061	139956811|139956722|139956644|139956760|139956721|139956694|139956692|139956703|139956666|139956726|139956754|139956695|139956696|139956701|139956693|139956705|139956702|139956704|139956698|139956771	chr9	139956761	139956868	FLAM_C	-
A172	chr9	33348022	33348077	+	33348044	3	3	10	0.730364	2.72193	33348624|33348512|33348473|33348461|33348529|33348593|33348471	chr9	33348068	33348364	AluSg	+
A172	chr9	72646100	72646102	-	72646100	9	12	12	0.876437	3.09579	72645741|72645686|72645698|72645739|72645736|72645734|72645758|72645657|72645587	chr9	72645791	72646099	AluSz	-
A172	chr9	8013086	8013087	-	8013086	17	17	17	1.24162	3.49923	8012827|8012906|8012717|8012817|8012923|8012814|8012719|8012739|8012908|8012823|8012822|8012904	chr9	8012778	8013087	AluSx	-
A172	chr9	84447486	84447487	-	84447486	22	22	23	1.67984	2.88538	84447079|84447066|84447065|84447046|84447060|84447282|84447064|84447062	chr9	84447171	84447485	AluSq	-
A172	chr9	8923340	8923341	-	8923340	26	27	27	1.97198	4.10391	8923043|8923012|8923019|8923018|8923015|8923042|8923041|8923014|8923027|8923004|8923029|8923010|8922990|8923017|8923011|8923044|8923005|8923036|8922995	chr9	8923029	8923341	AluSx1	-
A172	chrX	1396587	1396588	+	1396587	9	9	9	0.657328	2.72548	1396845|1397240|1397051|1396944|1396841|1397230|1397050	chrX	1396587	1396886	AluSx	+
A172	chrX	153276758	153276850	-	153276774	4	4	26	1.89895	3.94347	153276311|153276212|153276215|153276542|153276182|153276222|153276200|153276201|153276500|153276236|153276451|153276187|153276202|153276194|153276203|153276199|153276211	chrX	153276542	153276840	AluJb	-
A172	chrX	23799871	23799872	+	23799871	21	21	21	1.53377	3.42733	23800082|23800085|23800079|23800048|23800054|23800077|23800080|23800084|23800083|23800088|23800081|23800075	chrX	23799871	23800030	FLAM_C	+
A172	chrX	317251	317252	-	317251	17	18	18	1.31466	2.89542	316986|316942|316877|316906|316788|316927|316933|316887|316790|316926	chrX	316942	317248	AluSx1	-
A172	chrX	40886957	40886958	+	40886957	11	11	12	0.876437	2.66353	40887257|40887250|40887264|40887247|40887265|40887258|40887252	chrX	40886958	40887255	AluSp	+
A172	chrX	41159709	41159710	+	41159709	13	13	13	0.949474	2.71929	41160034|41160027|41160035|41160036|41160025|41160045|41160028	chrX	41159710	41160019	AluSz	+
A172	chrX	48436245	48436286	+	48436272	2	3	12	0.876437	2.68872	48436498|48436500|48436615|48436641|48436622|48436643|48436667	chrX	48436270	48436480	AluSx	+
A172	chrX	9971705	9971706	-	9971705	24	24	24	1.75287	3.32394	9971300|9971297|9971337|9971520|9971415|9971412|9971414|9971382|9971411|9971416|9971250|9971413	chrX	9971405	9971706	AluSc	-
A375	chr1	100599317	100599318	+	100599317	8	8	9	1.40738	2.5	100599635|100599634|100599624|100599632|100599633|100599631	chr1	100599319	100599641	AluSz	+
A375	chr1	203429699	203429707	+	203429702	136	137	159	24.8637	5.20828	203429871|203429901|203429990|203430153|203429831|203429956|203430091|203429904|203429876|203429873|203429874|203430057|203430081|203429895|203429973|203429883|203429906|203429885|203429983|203429845|203429900|203429878|203429908|203429960|203430089|203429982|203429991|203430055|203430088|203429875|203429903|203429872|203430090|203429985|203430118|203430086|203429962|203429880|203429832|203429902…	chr1	203429702	203429998	AluSg	+
A375	chr12	120379018	120379019	+	120379018	85	86	86	13.4483	3.25745	120379344|120379340|120379338|120379348|120379346|120379339|120379342|120379345|120379349|120379347|120379205	chr12	120379020	120379316	AluSq	+
A375	chr1	213189814	213189815	+	213189814	20	20	20	3.12752	3.14644	213190258|213190238|213190249|213190234|213190227|213190243|213190010|213189933|213190009|213190230	chr1	213189815	213190121	AluY	+
A375	chr1	48662020	48662021	-	48662020	203	204	204	31.9007	3.69497	48661876|48661873|48661882|48661866|48661877|48661868|48661880|48661878|48661871|48661869|48661874|48661879|48661870|48661863|48661875|48661872|48661867|48661881	chr1	48661883	48662019	FLAM_C	-
A375	chr16	28814716	28814717	-	28814716	27	28	28	4.37852	3.00447	28814401|28814382|28814396|28814393|28814390|28814399|28814412|28814410|28814428|28814397	chr16	28814434	28814715	AluSx	-
A375	chr16	67845025	67845026	-	67845025	46	46	46	7.19328	2.94376	67844878|67844883|67844879|67844882|67844876|67844880|67844881|67844884|67844885	chr16	67844890	67845026	FLAM_C	-
A375	chr18	64289290	64289291	+	64289290	44	46	46	7.19328	2.94256	64289477|64289480|64289478|64289468|64289473|64289454|64289457|64289475|64289456|64289472|64289462|64289474|64289439	chr18	64289291	64289427	FLAM_C	+
A375	chr19	35611343	35611344	-	35611343	24	24	24	3.75302	2.64208	35611035|35611042|35611043|35611039|35611003|35611047|35610996	chr19	35611035	35611343	AluSz	-
A375	chr19	50602343	50602344	-	50602343	66	66	67	10.4772	3.82123	50602130|50602122|50602121|50602137|50602131|50602162|50602134|50602123|50602240|50602127|50602128|50602239|50602181|50602126|50602108|50602129|50602132|50602117	chr19	50602212	50602344	AluYa5	-
A375	chr19	50640573	50640588	-	50640583	263	270	317	49.5711	3.95691	50640365|50640360|50640400|50640362|50640369|50640366|50640356|50640364|50640371|50640398|50640368|50640373|50640359|50640358|50640337|50640397|50640363|50640370|50640401|50640372|50640367|50640422|50640361|50640432	chr19	50640452	50640584	AluYa5	-
A375	chr2	101368747	101368748	-	101368747	83	84	86	13.4483	2.79172	101368450|101368545|101368451|101368452|101368458|101368544|101368457|101368551|101368455|101368548|101368449|101368456	chr2	101368455	101368748	AluSg7	-
A375	chr22	38612141	38612168	+	38612141	3	3	10	1.56376	2.52193	38612402|38612397|38612398|38612405|38612403|38612390	chr22	38612101	38612399	AluJb	+
A375	chr3	128399477	128399482	-	128399481	9	9	14	2.18926	2.75343	128399205|128399212|128399286|128399204|128399281|128399356|128399351|128399211	chr3	128399192	128399478	AluSg	-
A375	chr5	76035084	76035090	+	76035084	16	16	24	3.75302	3.12581	76035358|76035360|76035359|76035357|76035354|76035293|76035356|76035361|76035384|76035380|76035374	chr5	76035084	76035385	AluSq2	+
A375	chr7	74025008	74025012	+	74025011	92	94	98	15.3248	4.27683	74025479|74025309|74025446|74025305|74025308|74025440|74025449|74025478|74025477|74025191|74025461|74025424|74025426|74025476|74025425|74025471|74025473|74025484|74025442|74025463|74025423|74025480|74025475|74025464|74025481|74025472|74025469	chr7	74025012	74025322	AluY	+
A375	chr8	141501953	141501954	+	141501953	46	48	49	7.66241	3.17526	141502250|141502280|141502245|141502222|141502219|141552688|141502254|141502247|141502273|141502240|141502270|141502077|141502227	chr8	141501956	141502255	AluSz	+
adrenal_gland_female_adult_51_years	chr10	104586752	104586867	-	104586807	6	6	39	2.25926	4.67002	104586567|104586344|104586697|104586639|104586719|104586561|104586529|104586353|104586594|104586606|104586608|104586568|104586640|104586647|104586269|104586611|104586604|104586268|104586575|104586339|104586524|104586691|104586569|104586607|104586591|104586601|104586603|104586598	chr10	104586682	104586849	AluJb	-
adrenal_gland_female_adult_51_years	chr10	104587011	104587052	-	104587023	10	13	29	1.67996	3.81437	104586613|104586273|104586602|104586596|104586605|104586692|104586707|104586593|104586608|104586724|104586595|104586607|104586700|104586591|104586695|104586604|104586569	chr10	104586849	104587147	AluY	-
adrenal_gland_female_adult_51_years	chr10	104587243	104587265	-	104587264	5	5	10	0.579297	3.12193	104586392|104587012|104586646|104586592|104586810|104587043|104586951|104586707|104586954	chr10	104587147	104587284	AluJb	-
adrenal_gland_female_adult_51_years	chr10	104622905	104622909	+	104622907	22	30	30	1.73789	3.87291	104623199|104623153|104623195|104623257|104623593|104623105|104623171|104623177|104623102|104623197|104623562|104623172|104623155|104623190|104623611|104623178|104623198	chr10	104622810	104623121	AluSg4	+
adrenal_gland_female_adult_51_years	chr10	104661868	104661888	+	104661884	7	7	17	0.984804	3.33717	104662262|104662263|104662287|104662261|104662272|104662281|104662260|104662276|104662265|104662248|104662244	chr10	104661796	104661975	AluJo	+
adrenal_gland_female_adult_51_years	chr10	104661976	104661990	+	104661989	12	12	16	0.926875	3.1899	104662264|104662253|104662262|104662254|104662269|104662270|104662260|104662249|104662113|104662261	chr10	104661977	104662269	AluSz	+
adrenal_gland_female_adult_51_years	chr10	13179035	13179192	+	13179120	8	8	54	3.1282	4.53314	13179521|13179555|13179550|13179565|13179551|13179300|13179556|13179295|13179569|13179539|13179302|13179198|13179512|13179301|13179549|13179298|13179296|13179299|13179572|13179568|13179310|13179680|13179682|13179649|13179571|13179292|13179293|13179566|13179520|13179297	chr10	13178997	13179298	AluSz	+
adrenal_gland_female_adult_51_years	chr10	15556673	15556713	-	15556712	11	11	20	1.15859	3.68188	15556299|15556300|15556307|15556298|15556360|15556303|15556296|15556487|15556071|15556142|15556561|15556165|15556376|15556476	chr10	15556386	15556699	AluSx1	-
adrenal_gland_female_adult_51_years	chr10	76938475	76938517	+	76938516	3	3	7	0.405508	2.52164	76938846|76938959|76938955|76938795|76938957|76938701	chr10	76938504	76938814	AluSz	+
adrenal_gland_female_adult_51_years	chr11	17110077	17110110	-	17110109	7	7	12	0.695156	2.58496	17109919|17109365|17109344|17109920|17109558|17109602|17109649	chr11	17109795	17110088	AluSq2	-
adrenal_gland_female_adult_51_years	chr11	47235982	47236047	+	47235994	13	13	53	3.07027	4.37649	47236718|47236658|47236717|47236700|47236147|47236702|47238581|47254469|47236337|47236738|47236336|47237930|47236667|47236701|47236703|47237934|47236705|47236711|47236155|47236739|47236653|47236699|47237933|47236713|47236712|47236747|47236714|47236633|47236693	chr11	47236061	47236338	AluJo	+
adrenal_gland_female_adult_51_years	chr11	60161955	60161982	+	60161981	5	5	10	0.579297	2.72193	60162296|60162203|60162248|60162126|60162362|60162165|60162374	chr11	60161991	60162305	AluSq	+
adrenal_gland_female_adult_51_years	chr1	160259580	160259640	-	160259580	8	8	22	1.27445	3.3908	160259143|160259327|160259205|160259469|160259372|160259146|160259147|160259233|160259325|160259326|160259148|160259150	chr1	160259378	160259680	AluSz6	-
adrenal_gland_female_adult_51_years	chr11	61569430	61569469	-	61569440	1	1	7	0.405508	2.52164	61568731|61568661|61569200|61569235|61568722|61568723	chr11	61569354	61569516	AluSx	-
adrenal_gland_female_adult_51_years	chr11	65206785	65206838	+	65206831	4	5	12	0.695156	3.02205	65207060|65207018|65206935|65207321|65207178|65207014|65207017|65207394|65207155	chr11	65206871	65207155	AluSz6	+
adrenal_gland_female_adult_51_years	chr11	65207783	65207907	+	65207857	26	27	109	6.31433	4.76094	65208057|65208047|65208050|65208048|65208078|65208051|65207994|65208036|65207986|65208077|65208074|65207939|65208226|65208380|65208043|65208059|65208076|65207946|65208044|65208072|65208073|65208040|65208071|65208070|65207965|65207964|65208060|65208053|65208049|65207960|65207976|65207954|65208401|65208045|65207979|65208176|65208052|65207938	chr11	65207794	65207955	AluJr	+
adrenal_gland_female_adult_51_years	chr11	65208110	65208185	+	65208130	21	28	58	3.35992	4.59378	65208416|65208412|65208404|65208414|65208433|65208410|65208647|65208411|65208280|65208428|65208401|65208381|65208393|65208645|65208409|65208839|65208408|65208388|65208394|65208407|65208435|65208563|65208549|65208413|65208550|65208390|65208389|65208402	chr11	65208071	65208335	AluSx3	+
adrenal_gland_female_adult_51_years	chr1	179326747	179326848	+	179326747	41	41	68	3.93922	3.9525	179327129|179327118|179326918|179327114|179327055|179327091|179327296|179327466|179327326|179327048|179326980|179327302|179327081|179327052|179327120|179327046|179327121|179327115|179327116|179327323|179327327|179327119|179327086|179327090	chr1	179326747	179326983	AluJo	+
adrenal_gland_female_adult_51_years	chr12	101623894	101623895	+	101623894	116	116	119	6.89363	4.6188	101624058|101624143|101624151|101624184|101624153|101624157|101624156|101624163|101624188|101624061|101624149|101624183|101624148|101624050|101624021|101624152|101624182|101624185|101624150|101624175|101624144|101624180|101624186|101623996|101624100|101624165|101624167|101624191|101624168|101624101|101624146|101624147|101624145|101624187|101624189	chr12	101623895	101624187	AluSz	+
adrenal_gland_female_adult_51_years	chr12	102316650	102316666	+	102316650	5	5	7	0.405508	2.80735	102317028|102317015|102316949|102317272|102317261|102317148|102316959	chr12	102316593	102316898	AluJb	+
adrenal_gland_female_adult_51_years	chr1	21545233	21545255	-	21545239	3	3	9	0.521367	2.75	21545036|21544935|21544982|21544918|21545037|21544934|21544872	chr1	21545078	21545383	AluSx1	-
adrenal_gland_female_adult_51_years	chr1	227921900	227921992	+	227921987	10	10	38	2.20133	3.8153	227922178|227922185|227922270|227922188|227922168|227922265|227922167|227922271|227922181|227922401|227922183|227922179|227922382|227922400|227922187|227922269|227922166	chr1	227921950	227922129	AluJb	+
adrenal_gland_female_adult_51_years	chr1	228291142	228291192	+	228291142	5	7	17	0.984804	3.875	228291658|228291848|228291789|228291807|228291788|228291589|228291592|228291716|228291798|228291799|228291655|228291445|228291677|228291657|228291614	chr1	228291219	228291508	AluSz	+
adrenal_gland_female_adult_51_years	chr1	231701128	231701157	+	231701133	2	2	7	0.405508	2.80735	231701311|231701594|231701593|231701406|231701596|231701591|231701599	chr1	231701189	231701495	AluSg	+
adrenal_gland_female_adult_51_years	chr1	23707687	23707781	-	23707713	3	3	16	0.926875	3.375	23707453|23707435|23707436|23707441|23707567|23707563|23707456|23707431|23707434|23707609|23707603|23707607	chr1	23707568	23707706	FLAM_C	-
adrenal_gland_female_adult_51_years	chr12	66531375	66531376	-	66531375	10	10	11	0.637226	2.72193	66530865|66531163|66531160|66530868|66531165|66531161|66530795	chr12	66531178	66531473	AluSc	-
adrenal_gland_female_adult_51_years	chr12	7247910	7247912	-	7247910	6	11	11	0.637226	2.84535	7247735|7247635|7247658|7247653|7247615|7247480|7247710|7247700	chr12	7247714	7248009	AluSc	-
adrenal_gland_female_adult_51_years	chr12	81649239	81649326	+	81649274	6	8	30	1.73789	4.21506	81649968|81649454|81649467|81649959|81649952|81649752|81649950|81649946|81649763|81649756|81649954|81649753|81649469|81649760|81649754|81649758|81649951|81649943|81649748|81649947|81649750	chr12	81649329	81649598	AluSz	+
adrenal_gland_female_adult_51_years	chr1	32641056	32641075	+	32641073	5	7	12	0.695156	2.58496	32641306|32641296|32641304|32641288|32641456|32641310|32641466	chr1	32641103	32641405	AluSx3	+
adrenal_gland_female_adult_51_years	chr1	32696815	32696876	+	32696830	6	6	15	0.868945	3.00624	32697118|32697065|32697012|32697048|32697119|32697140|32697056|32697121|32697005	chr1	32696812	32697110	AluSp	+
adrenal_gland_female_adult_51_years	chr14	58467633	58467667	-	58467666	3	3	9	0.521367	2.72548	58467239|58467238|58467246|58467219|58467214|58467250|58467224	chr14	58467303	58467610	AluSc8	-
adrenal_gland_female_adult_51_years	chr14	65400755	65400859	+	65400773	6	6	23	1.33238	3.84922	65401078|65401187|65401174|65401143|65401186|65401134|65401184|65401188|65401137|65401179|65401178|65401177|65401126|65401180|65401182|65401142	chr14	65400779	65401095	AluSx	+
adrenal_gland_female_adult_51_years	chr14	68144583	68144658	-	68144606	15	15	38	2.20133	4.64896	68144293|68144147|68144298|68144292|68144289|68144146|68144290|68144308|68144158|68144288|68144301|68144201|68144120|68144345|68143790|68144325|68144302|68144317|68144300|68144344|68144256|68144296|68144286|68144304|68144307|68144310|68144324	chr14	68144496	68144578	AluSq10	-
adrenal_gland_female_adult_51_years	chr14	70836082	70836101	-	70836100	9	9	12	0.695156	2.91398	70835808|70835881|70835629|70835810|70835767|70835787|70835763|70835817	chr14	70835819	70836111	AluJb	-
adrenal_gland_female_adult_51_years	chr1	48662020	48662021	-	48662020	387	387	387	22.4188	3.81813	48661863|48661878|48661869|48661872|48661877|48661870|48661876|48661879|48661871|48661881|48661880|48661868|48661873|48661867|48661866|48661882|48661874|48661875	chr1	48661883	48662019	FLAM_C	-
adrenal_gland_female_adult_51_years	chr15	40711011	40711149	+	40711067	4	7	44	2.5489	3.10512	40711359|40711259|40711356|40711358|40711354|40711352|40711380|40711357|40711257|40711505|40711355|40711353|40711360	chr15	40711050	40711356	AluSq2	+
adrenal_gland_female_adult_51_years	chr15	40711839	40711915	+	40711851	5	5	15	0.868945	3.37356	40712500|40712100|40712566|40712181|40712235|40712470|40712118|40712173|40712322|40712472|40712172	chr15	40711728	40712016	AluSg7	+
adrenal_gland_female_adult_51_years	chr15	41571030	41571085	+	41571064	5	5	23	1.33238	3.91487	41571658|41571659|41572098|41571777|41571953|41571858|41572104|41571776|41571664|41571708|41571662|41571713|41571849|41571857|41571838|41571856|41571660	chr15	41571128	41571424	AluSg	+
adrenal_gland_female_adult_51_years	chr15	42707465	42707494	-	42707493	3	3	9	0.521367	2.9477	42707202|42707196|42707117|42707195|42707279|42707119|42706923|42707116	chr15	42707320	42707619	AluSq2	-
adrenal_gland_female_adult_51_years	chr15	65869312	65869751	+	65869528	34	36	231	13.3818	5.65069	65869772|65869778|65869917|65869824|65869800|65869806|65869913|65870378|65869808|65869793|65869798|65869770|65869791|65869797|65869769|65869774|65869773|65869767|65869918|65869786|65869911|65869906|65869910|65869785|65869541|65869795|65869813|65870373|65869777|65869854|65870163|65869782|65869775|65869789|65869916|65869779|65869780|65869776|65869799|65869909|65870211|65869919|65870166|65869768|658…	chr15	65869491	65869764	AluJr	+
adrenal_gland_female_adult_51_years	chr15	89744022	89744065	+	89744042	4	4	11	0.637226	2.91398	89744201|89744323|89744341|89744205|89744937|89744346|89744234|89744335	chr15	89744031	89744326	AluSq	+
adrenal_gland_female_adult_51_years	chr16	19513926	19513970	-	19513969	9	9	26	1.50617	3.68872	19513495|19513488|19513428|19513438|19513491|19513479|19513435|19513434|19513467|19513771|19513666|19513436|19513660|19513486|19513437	chr16	19513696	19513980	AluJr	-
adrenal_gland_female_adult_51_years	chr16	29708872	29709124	+	29708934	17	21	165	9.55839	4.98955	29709203|29709219|29709240|29709321|29709198|29709200|29709319|29709318|29709314|29709317|29709202|29709330|29709327|29709229|29709227|29709209|29709315|29709322|29709313|29709207|29709316|29709232|29709399|29709326|29709201|29709310|29709328|29709244|29709338|29709072|29709618|29709312|29709238|29709250|29709237|29709307|29709320|29709305|29709400|29709226|29709311|29709309|29709306|29709713|297…	chr16	29709025	29709334	AluSz	+
adrenal_gland_female_adult_51_years	chr16	66978091	66978156	+	66978133	8	9	42	2.43305	3.41152	66978322|66978366|66978386|66978393|66978369|66978323|66978281|66978301|66978506|66978363|66978364|66978499|66978367|66978365	chr16	66978092	66978226	FLAM_A	+
adrenal_gland_female_adult_51_years	chr16	67845025	67845026	-	67845025	75	76	78	4.51851	2.7557	67844881|67844883|67844878|67844884|67844876|67844877|67844885|67844882|67844880|67844879	chr16	67844890	67845026	FLAM_C	-
adrenal_gland_female_adult_51_years	chr16	9204737	9204789	+	9204766	5	5	16	0.926875	3.1899	9205292|9204971|9205260|9204923|9205293|9205296|9205397|9204877|9205005|9205313	chr16	9204624	9204912	AluSp	+
adrenal_gland_female_adult_51_years	chr17	1368394	1368415	-	1368394	7	7	15	0.868945	2.69238	1368202|1368110|1367780|1368008|1368059|1368107|1368092|1368109	chr17	1368106	1368405	AluSx	-
adrenal_gland_female_adult_51_years	chr17	19579715	19579765	+	19579761	3	3	13	0.753086	3.25163	19580138|19580342|19580275|19580224|19580182|19580249|19580217|19580023|19580265|19580086	chr17	19579684	19579981	AluJb	+
adrenal_gland_female_adult_51_years	chr17	40555270	40555336	-	40555270	3	3	15	0.868945	3.32486	40554973|40554857|40555121|40554499|40554503|40554946|40555127|40554732|40554916|40555053|40554815	chr17	40555091	40555246	AluJr	-
adrenal_gland_female_adult_51_years	chr17	40555969	40556052	-	40556001	6	9	32	1.85375	3.94712	40555762|40555836|40555660|40555760|40555606|40555716|40555386|40555721|40555617|40555517|40555657|40555738|40555766|40555649|40555647|40555324|40555646|40555862|40555809	chr17	40555639	40555958	AluSx	-
adrenal_gland_female_adult_51_years	chr17	419777	419784	-	419783	5	5	7	0.405508	2.58496	419515|419302|419604|419478|419508|419509	chr17	419609	419901	AluSc	-
adrenal_gland_female_adult_51_years	chr17	7485037	7485147	+	7485056	11	12	40	2.31719	4.18418	7485331|7485279|7485269|7485330|7485280|7485271|7485328|7485397|7485329|7485276|7485287|7485395|7485327|7485274|7485281|7485296|7485284|7485348|7485270|7485278|7485272	chr17	7484958	7485270	AluSz	+
adrenal_gland_female_adult_51_years	chr1	79107953	79108034	+	79108017	9	12	31	1.79582	3.60341	79108297|79108319|79108322|79108273|79108278|79108276|79108106|79108308|79108304|79108317|79108285|79108384|79108321|79108312	chr1	79108028	79108283	AluJb	+
adrenal_gland_female_adult_51_years	chr18	21062316	21062337	+	21062336	7	7	12	0.695156	3.08496	21062658|21062454|21062565|21062566|21063084|21062560|21062559|21062571|21062563	chr18	21062191	21062492	AluSz	+
adrenal_gland_female_adult_51_years	chr18	64289290	64289291	+	64289290	67	67	67	3.88129	3.30755	64289478|64289473|64289474|64289475|64289471|64289464|64289469|64289477|64289472|64289461|64289456|64289458|64289463|64289470|64289476	chr18	64289291	64289427	FLAM_C	+
adrenal_gland_female_adult_51_years	chr18	72187533	72187570	+	72187533	9	9	19	1.10066	3.57243	72187827|72188035|72188343|72187744|72188055|72188032|72187822|72187864|72187650|72187786|72187743|72187739|72188056	chr18	72187608	72187899	AluJr	+
adrenal_gland_female_adult_51_years	chr19	11276531	11276635	-	11276617	5	6	27	1.5641	4.05602	11276231|11276226|11275929|11275758|11276237|11275989|11276230|11276424|11276427|11276239|11276247|11276077|11276119|11276233|11276160|11276229|11276426|11276325|11276238	chr19	11276240	11276529	AluJo	-
adrenal_gland_female_adult_51_years	chr19	12986495	12986496	-	12986495	9	9	9	0.521367	2.9477	12986202|12986265|12986205|12986102|12986328|12986200|12986198|12986196	chr19	12986202	12986503	AluSz	-
adrenal_gland_female_adult_51_years	chr19	16212906	16213012	+	16212999	19	19	62	3.59164	4.3697	16213641|16213676|16213202|16213646|16213642|16213648|16213483|16213643|16213672|16213481|16213486|16213635|16213655|16213675|16213484|16213553|16213067|16213639|16213680|16213485|16213671|16213480|16213360|16213090|16213439|16213644|16213640	chr19	16212878	16213167	AluSz	+
adrenal_gland_female_adult_51_years	chr19	21366969	21366970	+	21366969	9	9	9	0.521367	2.50326	21367212|21367553|21367205|21367291|21367276|21367214	chr19	21366870	21367159	AluSc	+
adrenal_gland_female_adult_51_years	chr19	38819710	38819712	+	38819711	7	11	11	0.637226	2.91398	38819885|38819880|38819898|38820100|38819891|38819884|38819881|38819879	chr19	38819673	38819910	AluYf4	+
adrenal_gland_female_adult_51_years	chr19	39889818	39889845	+	39889818	13	15	26	1.50617	3.76334	39890099|39890313|39890269|39890279|39890275|39890094|39890277|39890325|39890278|39890334|39890272|39890074|39890135|39890376|39890112|39890097	chr19	39889892	39890188	AluSx3	+
adrenal_gland_female_adult_51_years	chr19	45596086	45596093	-	45596086	6	6	12	0.695156	3.02205	45595707|45595407|45595870|45595578|45595427|45595869|45595429|45595433|45595438	chr19	45595752	45596044	AluJr	-
adrenal_gland_female_adult_51_years	chr19	46970821	46970862	-	46970848	2	2	8	0.463437	2.52164	46970522|46970320|46970325|46970526|46970525|46970528	chr19	46970676	46970959	AluSg	-
adrenal_gland_female_adult_51_years	chr19	48374574	48374688	-	48374596	16	16	58	3.35992	4.77533	48374264|48374402|48373998|48374172|48374312|48374382|48374227|48374401|48374237|48374399|48373995|48374017|48374443|48374444|48374442|48374309|48374423|48374405|48373961|48374377|48373872|48374374|48374422|48374225|48374447|48374313|48374372|48374421|48374267|48374375|48373908|48374363|48374398|48374407|48374403	chr19	48374415	48374546	AluYg6	-
adrenal_gland_female_adult_51_years	chr19	50320881	50320898	+	50320881	5	5	8	0.463437	2.52164	50321225|50321203|50321192|50321477|50321484|50321184	chr19	50320898	50321208	AluSx1	+
adrenal_gland_female_adult_51_years	chr19	50434699	50434703	+	50434699	6	6	8	0.463437	2.52164	50434940|50434965|50434929|50434941|50434939|50434893	chr19	50434646	50434919	AluJr	+
adrenal_gland_female_adult_51_years	chr19	50640583	50640587	-	50640583	11	11	14	0.811015	3.18083	50640368|50640369|50640367|50640370|50640364|50640358|50640398|50640363|50640360|50640366	chr19	50640452	50640584	AluYa5	-
adrenal_gland_female_adult_51_years	chr19	53570259	53570289	-	53570259	5	5	7	0.405508	2.52164	53570017|53570035|53569806|53569967|53570037|53570032	chr19	53570035	53570333	AluSp	-
adrenal_gland_female_adult_51_years	chr20	35519013	35519219	-	35519081	15	16	86	4.98195	5.22626	35518799|35518821|35518856|35518879|35518868|35518960|35518846|35518858|35518861|35518890|35518824|35518842|35518684|35518893|35518850|35518827|35518862|35518848|35518863|35518867|35518940|35518801|35518865|35518690|35518810|35518859|35518816|35519047|35518817|35518809|35518833|35518819|35518876|35518855|35518843|35518840|35518830|35519045|35518864|35518834|35518832|35518877|35518866|35518854|355…	chr20	35518867	35519179	AluSq2	-
adrenal_gland_female_adult_51_years	chr20	43535886	43535994	+	43535929	4	5	23	1.33238	4.05596	43536130|43536669|43537041|43536386|43536218|43536387|43536610|43536132|43536116|43536183|43536181|43536214|43536216|43536153|43536219|43536671|43536268|43536217	chr20	43535937	43536118	FAM	+
adrenal_gland_female_adult_51_years	chr20	47863605	47863606	-	47863605	73	75	76	4.40265	4.09457	47863362|47863338|47863080|47863077|47863365|47863366|47863074|47863217|47863280|47863337|47863073|47863279|47862948|47863367|47863335|47863339|47863361|47862829|47863220|47863130|47863075|47863281|47863340|47863336|47863024|47863310	chr20	47863409	47863703	AluSq2	-
adrenal_gland_female_adult_51_years	chr20	54942360	54942854	+	54942456	19	19	212	12.2811	5.51651	54942729|54943483|54942875|54943064|54942985|54942704|54942829|54943650|54942589|54942760|54943061|54942722|54942598|54942701|54942953|54943258|54943053|54943348|54942954|54942950|54943069|54942695|54943059|54943225|54943467|54942700|54943346|54943063|54943347|54942982|54942815|54942703|54942867|54942756|54943056|54942945|54943071|54943086|54942702|54942705|54942854|54943078|54942952|54942951|549…	chr20	54942412	54942704	AluSz	+
adrenal_gland_female_adult_51_years	chr2	102793508	102793543	+	102793516	6	6	19	1.10066	4.0374	102793786|102794253|102793648|102794011|102793963|102793642|102793654|102794016|102793780|102794015|102793947|102793639|102793646|102793782|102793662|102793647|102794006	chr2	102793443	102793731	AluSx	+
adrenal_gland_female_adult_51_years	chr2	109302894	109302921	+	109302894	3	6	9	0.521367	2.72548	109303438|109303525|109303486|109303488|109303135|109303006|109303137	chr2	109302945	109303246	AluY	+
adrenal_gland_female_adult_51_years	chr2	112775059	112775088	+	112775078	5	5	12	0.695156	2.68872	112775393|112775376|112775289|112775375|112775377|112775398|112775394	chr2	112774996	112775222	AluSx	+
adrenal_gland_female_adult_51_years	chr2	114467594	114467710	-	114467709	5	5	32	1.85375	4.4497	114467269|114467482|114467517|114467515|114467484|114467372|114467181|114467500|114467556|114467373|114467266|114467180|114466507|114467485|114467182|114467030|114467377|114467223|114467483|114467375|114467028|114466914|114467268|114467336|114467378	chr2	114467385	114467679	AluJo	-
adrenal_gland_female_adult_51_years	chr2	131186082	131186115	-	131186106	5	5	16	0.926875	3.50689	131185669|131185651|131185637|131185631|131185353|131185820|131185754|131185634|131185816|131185818|131182684|131185741	chr2	131185946	131186078	AluY	-
adrenal_gland_female_adult_51_years	chr21	34668933	34668958	+	34668949	3	4	7	0.405508	2.52164	34669164|34669174|34669163|34669169|34669184|34669389	chr21	34668971	34669278	AluSz	+
adrenal_gland_female_adult_51_years	chr21	34822741	34822762	-	34822757	4	4	9	0.521367	2.72548	34822514|34822315|34822308|34822189|34822454|34822253|34822250	chr21	34822511	34822802	AluSx1	-
adrenal_gland_female_adult_51_years	chr2	136664906	136664978	-	136664965	4	4	31	1.79582	3.35659	136664520|136664519|136664518|136664728|136664523|136664517|136664729|136664521|136664560|136664515|136664725|136664522|136664525	chr2	136664808	136664874	AluJo	-
adrenal_gland_female_adult_51_years	chr21	46189507	46189545	-	46189541	3	3	13	0.753086	3.54659	46189118|46189120|46189264|46189122|46189177|46189277|46189124|46189257|46189123|46189125|46189128|46189138	chr21	46189293	46189592	AluY	-
adrenal_gland_female_adult_51_years	chr21	46190508	46190583	-	46190535	20	22	37	2.1434	3.66257	46190243|46190301|46190322|46190236|46190245|46190244|46190239|46190300|46190160|46190321|46190242|46190323|46190126|46190241|46190246|46190240	chr21	46190334	46190631	AluSc8	-
adrenal_gland_female_adult_51_years	chr2	172177884	172177962	-	172177935	3	4	16	0.926875	3.25	172177724|172177530|172177626|172177515|172177605|172177514|172177516|172177506|172177509|172177538|172177512	chr2	172177802	172177979	AluJb	-
adrenal_gland_female_adult_51_years	chr2	198339104	198339161	+	198339138	7	7	18	1.04273	3.46132	198339442|198339301|198339332|198339324|198339315|198339331|198339302|198339379|198339311|198339606|198339443|198339300	chr2	198339127	198339427	AluSz6	+
adrenal_gland_female_adult_51_years	chr2	202031994	202032018	+	202032004	9	9	12	0.695156	2.91398	202032256|202032258|202032338|202032255|202032474|202032413|202032247|202032257	chr2	202031954	202032249	AluJo	+
adrenal_gland_female_adult_51_years	chr2	206985629	206985655	-	206985635	9	9	17	0.984804	3.625	206985331|206985184|206985499|206985335|206985005|206985194|206985285|206985436|206985280|206985050|206985276|206985277|206985381	chr2	206985579	206985649	AluJo	-
adrenal_gland_female_adult_51_years	chr2	238673561	238673586	+	238673568	6	6	13	0.753086	3.08496	238673914|238673924|238673921|238673922|238673927|238673916|238673915|238673928|238673830	chr2	238673622	238673922	AluSq2	+
adrenal_gland_female_adult_51_years	chr22	40729013	40729035	+	40729033	8	9	16	0.926875	3.05656	40729361|40729362|40729539|40729261|40729358|40729262|40729895|40729364|40729542	chr22	40729065	40729361	AluSx	+
adrenal_gland_female_adult_51_years	chr2	26952425	26952463	+	26952448	2	2	12	0.695156	3.4183	26952557|26952863|26953307|26952585|26952657|26952622|26952605|26953001|26952780|26952997|26952646	chr2	26952421	26952720	AluJb	+
adrenal_gland_female_adult_51_years	chr2	26954089	26954125	+	26954107	12	12	16	0.926875	3.0244	26954444|26954540|26954348|26954368|26954342|26954346|26954533|26954337|26954338|26954340	chr2	26954167	26954475	AluSz6	+
adrenal_gland_female_adult_51_years	chr2	37331743	37331752	-	37331743	5	5	7	0.405508	2.52164	37331451|37331422|37331514|37331457|37331449|37331423	chr2	37331457	37331762	AluJo	-
adrenal_gland_female_adult_51_years	chr2	38961220	38961333	+	38961315	16	16	74	4.28679	4.70175	38961637|38961663|38961741|38961636|38961455|38961742|38961658|38961635|38961638|38961681|38961740|38961592|38961656|38961627|38961736|38961672|38961723|38961466|38961631|38961660|38961632|38961744|38961457|38961743|38961739|38961680|38961666|38961735|38961434|38961678|38961724|38961489|38961630	chr2	38961258	38961555	AluSc8	+
adrenal_gland_female_adult_51_years	chr2	70504751	70504843	+	70504825	9	9	41	2.37512	4.39394	70505155|70505158|70505224|70505010|70505153|70505373|70505371|70505225|70505027|70505161|70505042|70505043|70505157|70505016|70505170|70505294|70505159|70505370|70505005|70505154|70505160|70505223|70504996|70505044	chr2	70504783	70504888	AluSq2	+
adrenal_gland_female_adult_51_years	chr2	86731778	86731807	-	86731806	2	3	8	0.463437	2.52164	86731474|86731454|86731482|86731463|86731480|86731479	chr2	86731634	86731769	FLAM_C	-
adrenal_gland_female_adult_51_years	chr2	9629473	9629492	-	9629491	26	26	29	1.67996	2.96358	9629173|9629175|9629172|9629263|9629259|9629258|9629261|9629264|9629174|9629260	chr2	9629388	9629510	AluSz6	-
adrenal_gland_female_adult_51_years	chr3	120046418	120046494	-	120046493	5	5	19	1.10066	3.53689	120045510|120046190|120045892|120046251|120045966|120045896|120046203|120046204|120045889|120046225|120046200|120046254|120045890	chr3	120046090	120046400	AluY	-
adrenal_gland_female_adult_51_years	chr3	120046793	120046852	-	120046793	3	5	16	0.926875	2.60624	120046518|120046456|120046455|120046439|120046453|120046491|120046517|120046436	chr3	120046582	120046888	AluSx	-
adrenal_gland_female_adult_51_years	chr3	172223843	172223958	-	172223843	3	3	26	1.50617	3.56545	172223638|172223620|172223614|172223385|172223608|172223617|172223612|172223613|172223383|172223630|172223615|172223710|172223621|172223764|172223640	chr3	172223515	172223813	AluSc	-
adrenal_gland_female_adult_51_years	chr3	185009935	185009945	+	185009935	10	10	12	0.695156	3.09579	185010122|185010109|185010115|185010117|185010105|185010106|185010173|185010128|185010137	chr3	185009810	185010106	AluSx1	+
adrenal_gland_female_adult_51_years	chr3	188595295	188595307	+	188595306	4	6	8	0.463437	3	188595563|188595612|188595777|188595501|188595846|188595827|188595862|188595564	chr3	188595351	188595525	AluJr	+
adrenal_gland_female_adult_51_years	chr3	195963763	195963799	-	195963763	2	2	10	0.579297	3.12193	195963387|195963536|195963487|195963489|195963535|195963542|195963541|195963537|195963625	chr3	195963539	195963837	AluSx1	-
adrenal_gland_female_adult_51_years	chr3	196080596	196080638	-	196080616	2	2	7	0.405508	2.52164	196080139|196080228|196080229|196080231|196080338|196080251	chr3	196080343	196080657	AluSx	-
adrenal_gland_female_adult_51_years	chr3	196663377	196663405	-	196663388	4	4	9	0.521367	3.16993	196663126|196662877|196663013|196663164|196663010|196663120|196662966|196662737|196663127	chr3	196663324	196663446	AluJr	-
adrenal_gland_female_adult_51_years	chr3	52289156	52289204	-	52289203	3	3	14	0.811015	2.98523	52288898|52288845|52288879|52288875|52288577|52288871|52288896|52288874|52288848	chr3	52288956	52289257	AluSp	-
adrenal_gland_female_adult_51_years	chr4	17804985	17805009	-	17804989	12	12	29	1.67996	2.60644	17804585|17804763|17804595|17804640|17804774|17804589|17804590|17804591|17804639	chr4	17804653	17804947	AluSx	-
adrenal_gland_female_adult_51_years	chr4	39549747	39549814	-	39549813	20	20	33	1.91168	4.49894	39549620|39549497|39549390|39548742|39549045|39549043|39549258|39549383|39549494|39549501|39548978|39549493|39549498|39549338|39549303|39549476|39549433|39549643|39549485|39549276|39549489|39549275|39549384|39549301	chr4	39549525	39549824	AluSp	-
adrenal_gland_female_adult_51_years	chr4	39550062	39550101	-	39550062	4	4	14	0.811015	2.77736	39549824|39549781|39549821|39549931|39549852|39549932|39549775|39549934	chr4	39549981	39550111	FLAM_C	-
adrenal_gland_female_adult_51_years	chr4	39552190	39552244	-	39552238	4	4	20	1.15859	3.52193	39551896|39551840|39551467|39551837|39551628|39551862|39552063|39552007|39551835|39552008|39551895|39551894|39552022	chr4	39551898	39552201	AluSx	-
adrenal_gland_female_adult_51_years	chr4	57326987	57326988	+	57326987	15	15	16	0.926875	2.68259	57327231|57327235|57327202|57327359|57327351|57327233|57327162|57327352	chr4	57326855	57327154	AluSx1	+
adrenal_gland_female_adult_51_years	chr4	83405008	83405107	-	83405096	12	12	64	3.7075	4.63554	83404893|83404443|83404747|83404583|83404746|83404863|83404692|83404743|83404774|83404697|83404696|83404866|83404760|83404864|83404865|83404695|83404895|83404765|83404745|83404783|83404752|83404744|83404687|83404749|83404756|83404758|83404773|83404748|83404902|83404651|83404604	chr4	83404935	83405243	AluSp	-
adrenal_gland_female_adult_51_years	chr5	135514351	135514438	+	135514410	4	4	22	1.27445	3.60694	135514760|135514762|135514765|135514763|135514759|135514502|135514595|135514500|135514764|135514761|135514870|135514766|135514767	chr5	135514460	135514763	AluSx4	+
adrenal_gland_female_adult_51_years	chr5	150560979	150561494	-	150561216	24	29	301	17.4368	4.30208	150560629|150560637|150560657|150561121|150560625|150560978|150560626|150560624|150560658|150560640|150560755|150560772|150561203|150561131|150560736|150560628|150561123|150560915|150561258|150560659|150561082|150560704|150560651|150560622|150560697|150560737|150561143|150560758|150560792|150560942|150560636|150560623|150560787|150560621|150560662|150560784|150560780|150560656|150560630|150560660…	chr5	150560771	150561076	AluY	-
adrenal_gland_female_adult_51_years	chr5	167982496	167982537	-	167982502	5	6	14	0.811015	3.18201	167982176|167982172|167982179|167982177|167982100|167982062|167982102|167982103|167982061|167982174	chr5	167982256	167982547	AluSx	-
adrenal_gland_female_adult_51_years	chr5	42993340	42993374	-	42993340	2	4	9	0.521367	2.9477	42993028|42993035|42992919|42992571|42992920|42993027|42992994|42992495	chr5	42993009	42993319	AluSx4	-
adrenal_gland_female_adult_51_years	chr5	43575798	43575865	-	43575840	3	4	14	0.811015	3.37878	43575435|43575501|43575528|43575648|43575499|43575647|43575641|43575646|43575643|43575508|43575629	chr5	43575662	43575975	AluSz	-
adrenal_gland_female_adult_51_years	chr5	79438327	79438355	-	79438336	2	2	9	0.521367	2.75	79438163|79438219|79437969|79437861|79437892|79438151|79438148	chr5	79438110	79438311	AluSz	-
adrenal_gland_female_adult_51_years	chr5	79922907	79922985	-	79922949	6	6	18	1.04273	2.82189	79922641|79922639|79922637|79922827|79922634|79922640|79922638|79922636	chr5	79922755	79922876	FLAM_A	-
adrenal_gland_female_adult_51_years	chr5	95130568	95130593	+	95130581	3	5	9	0.521367	2.5	95131093|95130956|95131096|95131095|95130958|95130952	chr5	95130524	95130822	AluSz	+
adrenal_gland_female_adult_51_years	chr6	111022127	111022128	+	111022127	13	13	13	0.753086	2.77736	111022567|111022466|111022560|111022436|111022328|111022342|111022295|111022441	chr6	111022127	111022414	AluSg4	+
adrenal_gland_female_adult_51_years	chr6	122765205	122765868	-	122765370	63	64	487	28.2117	5.78136	122765481|122765430|122765480|122765021|122765035|122765182|122765142|122765490|122765147|122765179|122765100|122764985|122765118|122764910|122765158|122765668|122765434|122765591|122765690|122765351|122765389|122764980|122765159|122765287|122765190|122765431|122765646|122765094|122765265|122765139|122765429|122765093|122765516|122765141|122765183|122765176|122765138|122765264|122765654|122765253…	chr6	122765165	122765430	AluJb	-
adrenal_gland_female_adult_51_years	chr6	126251259	126251337	+	126251300	5	6	18	1.04273	2.97494	126251784|126251648|126251556|126251649|126251783|126251788|126251787|126251785|126251565	chr6	126251223	126251499	AluSx1	+
adrenal_gland_female_adult_51_years	chr6	144148909	144149080	+	144148942	22	25	93	5.38746	5.25629	144149339|144149612|144149462|144149458|144149456|144149207|144149434|144149454|144149467|144149471|144149268|144149329|144149350|144149479|144149472|144149726|144149344|144149630|144149461|144149139|144149202|144149459|144149417|144149270|144149338|144149610|144149457|144149208|144149340|144149335|144149334|144149229|144149642|144149463|144149574|144149260|144149179|144149349|144149221|144149137…	chr6	144148997	144149288	AluSz	+
adrenal_gland_female_adult_51_years	chr6	149912148	149912242	+	149912176	9	9	39	2.25926	3.87208	149912556|149912457|149912499|149912485|149912501|149912710|149912459|149912555|149912506|149912440|149912569|149912486|149912503|149912520|149912553|149912554|149912455|149912507	chr6	149912148	149912439	AluSc	+
adrenal_gland_female_adult_51_years	chr6	2903050	2903051	-	2903050	68	68	68	3.93922	3.99002	2902736|2902822|2902798|2902760|2902741|2902744|2902718|2902737|2902746|2902759|2902738|2902715|2902742|2902739|2902862|2902714|2902743|2902754|2902761|2902717|2902719|2902758|2902753|2902740|2902752	chr6	2902742	2903051	AluSz	-
adrenal_gland_female_adult_51_years	chr6	30460804	30461026	+	30460848	38	38	94	5.44539	5.47453	30461138|30461145|30460969|30461224|30461443|30461357|30461150|30461255|30461148|30461641|30461221|30461099|30461147|30461139|30461146|30461307|30460983|30461239|30460979|30461236|30461305|30461486|30461183|30461096|30461143|30461254|30461308|30460961|30461095|30461142|30460984|30461180|30461144|30461222|30461091|30461090|30461263|30461186|30461188|30460976|30461245|30460993|30461102|30461185|304…	chr6	30460788	30461101	AluSc8	+
adrenal_gland_female_adult_51_years	chr6	30593544	30593771	+	30593694	6	9	71	4.11301	4.82185	30593944|30594027|30593803|30594033|30593884|30594031|30593897|30593931|30593907|30593883|30593894|30593926|30593905|30593902|30593887|30593900|30593888|30593975|30593892|30593922|30593903|30593976|30593951|30593885|30593886|30593891|30593804|30593901|30593899|30593942|30594061|30594032|30593990|30593904	chr6	30593595	30593888	AluJb	+
adrenal_gland_female_adult_51_years	chr6	34251180	34251184	-	34251183	3	5	7	0.405508	2.52164	34250781|34250944|34250797|34250701|34250572|34250573	chr6	34250974	34251279	AluSg	-
adrenal_gland_female_adult_51_years	chr6	34254850	34254885	-	34254884	10	10	16	0.926875	2.68259	34254521|34254511|34254505|34254691|34254510|34254518|34254389|34254507	chr6	34254566	34254853	AluSq2	-
adrenal_gland_female_adult_51_years	chr6	36893977	36894009	+	36894008	2	2	7	0.405508	2.80735	36894233|36894323|36894342|36894208|36894223|36894336|36894230	chr6	36894027	36894336	AluSx1	+
adrenal_gland_female_adult_51_years	chr6	42854348	42854404	+	42854371	2	2	12	0.695156	3.4183	42854759|42854620|42854928|42854706|42854622|42854964|42854891|42854654|42854630|42854691|42854752	chr6	42854451	42854749	AluSc	+
adrenal_gland_female_adult_51_years	chr6	86354613	86354614	+	86354613	8	8	8	0.463437	2.75	86354820|86354798|86354810|86354814|86354800|86354797|86354816	chr6	86354613	86354915	AluY	+
adrenal_gland_female_adult_51_years	chr6	90346563	90346574	-	90346564	4	7	10	0.579297	2.92193	90346204|90346407|90346401|90346408|90346399|90346396|90346110|90346206	chr6	90346399	90346699	AluSz	-
adrenal_gland_female_adult_51_years	chr7	114656369	114656399	+	114656398	3	3	10	0.579297	2.50326	114656780|114656606|114656579|114656542|114656600|114656747	chr7	114656404	114656746	AluSx	+
adrenal_gland_female_adult_51_years	chr7	121715064	121715110	-	121715064	6	6	13	0.753086	3.25163	121714802|121714631|121714693|121714570|121714903|121714888|121714890|121714691|121714692|121714569	chr7	121714903	121715076	AluJb	-
adrenal_gland_female_adult_51_years	chr7	138987245	138987247	+	138987246	6	9	9	0.521367	2.9477	138987523|138987524|138987526|138987527|138987539|138987536|138987522|138987532	chr7	138987149	138987447	AluY	+
adrenal_gland_female_adult_51_years	chr7	158524306	158524370	-	158524338	9	9	22	1.27445	3.21351	158523990|158523993|158523911|158523989|158524089|158524163|158523915|158524080|158523994|158523912|158523913	chr7	158523995	158524297	AluSx	-
adrenal_gland_female_adult_51_years	chr7	6488133	6488177	-	6488176	6	6	21	1.21652	3.14162	6487715|6487714|6487967|6487769|6487743|6487976|6487770|6487718|6487737|6487739	chr7	6487830	6488138	AluSz	-
adrenal_gland_female_adult_51_years	chr7	75164093	75164164	-	75164102	4	4	14	0.811015	3.03915	75163759|75163757|75163754|75163751|75163916|75163760|75163639|75163738|75163753	chr7	75163744	75164054	AluSx1	-
adrenal_gland_female_adult_51_years	chr7	99635266	99635343	+	99635292	8	8	28	1.62203	3.45949	99635653|99635676|99635655|99635660|99635799|99635657|99635656|99635533|99635659|99635658|99635496|99635536	chr7	99635358	99635654	AluSx3	+
adrenal_gland_female_adult_51_years	chr7	99636433	99636434	+	99636433	23	23	23	1.33238	3.88205	99636969|99636991|99636949|99636860|99636945|99636631|99636975|99636630|99636778|99636788|99636647|99636629|99636634|99636635|99636693|99636954	chr7	99636336	99636631	AluSc8	+
adrenal_gland_female_adult_51_years	chr7	99636702	99636710	+	99636709	8	8	11	0.637226	2.72193	99636969|99636968|99636950|99637209|99636949|99637143|99636979	chr7	99636652	99636958	AluSx1	+
adrenal_gland_female_adult_51_years	chr8	134471379	134471437	-	134471392	2	2	9	0.521367	2.50326	134471116|134470824|134471266|134471117|134470927|134470826	chr8	134471116	134471437	AluJo	-
adrenal_gland_female_adult_51_years	chr8	37999822	37999950	-	37999911	12	12	82	4.75023	5.17439	37999560|37999458|37999416|37999449|37999499|37999361|37999553|37999546|37999554|37999722|37999736|37999751|37999779|37999526|37999556|37999558|37999750|37999497|37999498|37999551|37999559|37999753|37999557|37999745|37999423|37999419|37999500|37999740|37999542|37999778|37999420|37999686|37999678|37999493|37999755|37999496|37999543|37999426|37999629|37999494|37999754|37999489|37999422|37999495	chr8	37999743	37999875	FLAM_A	-
adrenal_gland_female_adult_51_years	chr8	38000100	38000679	-	38000615	50	53	831	48.1395	6.04381	38000047|37999800|38000015|38000018|38000144|38000030|38000043|38000384|38000046|38000024|38000039|37999922|38000036|38000297|37999751|37999749|38000049|38000026|37999795|38000355|38000013|38000137|38000405|38000017|38000151|38000041|38000326|38000045|38000134|38000129|38000238|38000142|38000138|38000019|37999920|38000014|38000160|38000042|38000152|38000055|38000166|38000048|37999872|38000022|380…	chr8	38000050	38000328	AluSx	-
adrenal_gland_female_adult_51_years	chr8	38708169	38708186	+	38708169	5	5	9	0.521367	2.5	38708805|38708314|38708653|38708471|38708472|38708485	chr8	38708027	38708318	AluJb	+
adrenal_gland_female_adult_51_years	chr8	38828033	38828044	+	38828043	7	7	9	0.521367	2.9477	38828340|38828355|38828235|38828334|38828728|38828338|38828482|38828460	chr8	38828036	38828333	AluSq2	+
adrenal_gland_female_adult_51_years	chr8	98738946	98738975	+	98738974	5	5	11	0.637226	2.84535	98739197|98739156|98739196|98739226|98739319|98739316|98739219|98739199	chr8	98739020	98739317	AluSg7	+
adrenal_gland_female_adult_51_years	chr9	102733978	102734018	+	102734017	2	2	7	0.405508	2.52164	102734382|102734228|102734480|102734482|102734386|102734479	chr9	102734020	102734286	AluJr	+
adrenal_gland_female_adult_51_years	chr9	111781266	111781404	-	111781302	13	13	58	3.35992	4.45308	111780931|111780935|111780859|111781020|111780746|111781015|111780934|111780854|111781107|111781118|111781013|111781142|111781014|111780613|111780855|111781139|111780771|111780760|111781019|111780856|111780827|111780862|111780936|111780858|111780828|111780860|111781044	chr9	111781019	111781329	AluJb	-
adrenal_gland_female_adult_51_years	chr9	131019016	131019093	-	131019060	5	5	15	0.868945	2.95021	131018459|131018743|131018683|131018207|131018636|131018679|131018744|131018680|131018685	chr9	131018782	131019072	AluSx	-
adrenal_gland_female_adult_51_years	chr9	132590244	132590287	-	132590271	8	9	21	1.21652	3.18418	132589910|132590007|132590001|132589908|132589907|132589833|132590000|132589743|132590021|132589909	chr9	132590056	132590371	AluSp	-
adrenal_gland_female_adult_51_years	chr9	91619042	91619131	+	91619042	5	5	26	1.50617	4.39275	91619336|91619208|91619488|91619361|91619353|91619338|91619548|91619357|91619337|91619555|91619552|91619335|91619351|91619352|91619716|91619354|91619714|91619553|91619545|91619551|91619504|91619341	chr9	91619031	91619340	AluSx	+
adrenal_gland_female_adult_51_years	chrX	135748723	135748804	-	135748729	7	7	22	1.27445	3.35649	135748227|135748234|135748226|135748230|135748221|135748231|135748228|135748224|135748220|135748398|135748458|135748232	chrX	135748518	135748679	AluJr	-
adrenal_gland_female_adult_51_years	chrX	148560748	148560749	-	148560748	10	10	11	0.637226	2.64644	148560346|148560350|148560345|148560344|148560482|148560342|148560352	chrX	148560538	148560845	AluSg7	-
adrenal_gland_female_adult_51_years	chrX	16779131	16779167	+	16779165	3	7	14	0.811015	2.89629	16779477|16779529|16779480|16779487|16779490|16779483|16779446|16779484|16779411	chrX	16779066	16779353	AluSx1	+
adrenal_gland_female_adult_53_years	chr10	104586766	104586808	-	104586791	2	2	6	0.282555	2.58496	104586266|104586268|104586569|104586592|104586570|104586595	chr10	104586682	104586849	AluJb	-
adrenal_gland_female_adult_53_years	chr10	13179063	13179096	+	13179091	2	2	8	0.37674	2.5	13179296|13179285|13179557|13179570|13179288|13179292	chr10	13178997	13179298	AluSz	+
adrenal_gland_female_adult_53_years	chr10	69524852	69524857	+	69524852	4	4	6	0.282555	2.58496	69525048|69524986|69524985|69525027|69525034|69525103	chr10	69524852	69525156	AluY	+
adrenal_gland_female_adult_53_years	chr10	88855540	88855541	+	88855540	35	35	35	1.64824	2.65548	88855728|88855730|88855722|88855731|88855727|88855732|88855714|88855723|88855729	chr10	88855541	88855687	FRAM	+
adrenal_gland_female_adult_53_years	chr10	93042053	93042074	+	93042056	3	4	7	0.329647	2.52164	93042325|93042302|93042299|93043004|93042324|93042367	chr10	93041959	93042249	AluSz	+
adrenal_gland_female_adult_53_years	chr11	10535378	10535489	-	10535455	5	5	20	0.941849	3.22193	10534741|10535260|10534998|10534851|10535219|10535067|10534997|10534848|10534999|10535000|10535071	chr11	10535224	10535521	AluSx1	-
adrenal_gland_female_adult_53_years	chr11	47235985	47236039	+	47235994	6	6	24	1.13022	4.08496	47236739|47236347|47236711|47236712|47236692|47236150|47236387|47236152|47236710|47254402|47236657|47236721|47236665|47238538|47237891|47236735|47236701|47236154	chr11	47236061	47236338	AluJo	+
adrenal_gland_female_adult_53_years	chr1	155278157	155278158	-	155278157	11	11	11	0.518017	3.27761	155277941|155277760|155277765|155277770|155277761|155277962|155277731|155277797|155277766|155277982	chr1	155277846	155278157	AluSx3	-
adrenal_gland_female_adult_53_years	chr11	65245095	65245187	+	65245095	6	6	30	1.41277	3.89807	65245297|65245326|65245298|65245292|65245286|65245315|65245307|65245308|65245536|65245306|65245316|65245281|65245309|65245294|65245305|65245304|65245328|65245293	chr11	65245217	65245277	AluSz6	+
adrenal_gland_female_adult_53_years	chr11	77882931	77882993	-	77882939	3	3	11	0.518017	2.84535	77882625|77882593|77882567|77882313|77882421|77882565|77882563|77882627	chr11	77882681	77882950	AluSx1	-
adrenal_gland_female_adult_53_years	chr1	179326689	179326758	+	179326745	35	38	60	2.82555	4.39494	179327118|179327155|179327091|179327090|179327109|179327089|179327114|179327117|179327153|179327081|179327220|179327116|179327120|179327111|179327019|179327156|179327121|179327115|179327087|179327187|179327092|179327105|179327324|179327119|179326952|179327113	chr1	179326747	179326983	AluJo	+
adrenal_gland_female_adult_53_years	chr12	101623894	101623895	+	101623894	334	334	341	16.0585	4.99991	101624022|101624169|101624158|101624170|101624079|101624034|101624188|101624029|101624149|101624148|101624025|101624102|101624031|101624067|101624152|101624091|101624069|101624175|101624070|101624146|101624186|101624151|101624187|101624179|101624167|101624049|101624191|101624168|101624150|101624154|101624164|101624101|101624155|101624189|101624053|101624190|101624030|101624153|101624073|101624156…	chr12	101623895	101624187	AluSz	+
adrenal_gland_female_adult_53_years	chr12	110289575	110289578	-	110289577	4	7	7	0.329647	2.52164	110289096|110289324|110289327|110289072|110288865|110288971	chr12	110289399	110289655	AluSq	-
adrenal_gland_female_adult_53_years	chr12	117507341	117507342	-	117507341	14	14	15	0.706387	3.18201	117507141|117507168|117507156|117507143|117507130|117507129|117507164|117507166|117507144|117507097	chr12	117507054	117507342	AluSz	-
adrenal_gland_female_adult_53_years	chr12	120766463	120766466	+	120766465	9	13	13	0.612202	3.08506	120766755|120766763|120766639|120766640|120766636|120766756|120766713|120766627|120766635	chr12	120766465	120766756	AluSp	+
adrenal_gland_female_adult_53_years	chr1	226171363	226171364	-	226171363	10	10	10	0.470925	2.52193	226170909|226170948|226170944|226171139|226170611|226170952	chr1	226171252	226171351	FLAM_C	-
adrenal_gland_female_adult_53_years	chr1	228291125	228291195	+	228291171	5	6	35	1.64824	4.25057	228291649|228291848|228291516|228291798|228291619|228291654|228291853|228291850|228291441|228291385|228291404|228291657|228292295|228291851|228291854|228291794|228291788|228291506|228291664|228291790|228292299|228291677	chr1	228291219	228291508	AluSz	+
adrenal_gland_female_adult_53_years	chr1	243460135	243460136	-	243460135	8	8	8	0.37674	2.75	243459932|243460011|243459888|243459930|243459931|243459924|243459933	chr1	243459837	243460134	AluYd8	-
adrenal_gland_female_adult_53_years	chr1	24842352	24842353	+	24842352	39	39	39	1.83661	3.76952	24842645|24842557|24842661|24842672|24842701|24842699|24842675|24842648|24842671|24842649|24842644|24842669|24842655|24842636|24842673|24842668|24842524|24842697	chr1	24842352	24842657	AluSg	+
adrenal_gland_female_adult_53_years	chr12	69248873	69248899	-	69248881	10	10	18	0.847665	3.03856	69248370|69248348|69248393|69248372|69248643|69248414|69248373|69248350|69248539|69248402	chr12	69248643	69248939	AluSz	-
adrenal_gland_female_adult_53_years	chr12	7247910	7248075	-	7247912	14	29	107	5.03889	4.87484	7247754|7247736|7247741|7247515|7247446|7247448|7247649|7247563|7247739|7247514|7247609|7247517|7247737|7247516|7247693|7247560|7247559|7247652|7247730|7247651|7247738|7247654|7247508|7247650|7247732|7247733|7247731|7247646|7247673|7247518|7247635|7247694|7247653|7247558|7247641|7247734|7247655|7247714|7247480|7247735|7247647|7247447	chr12	7247714	7248009	AluSc	-
adrenal_gland_female_adult_53_years	chr1	32696776	32696822	+	32696803	3	3	17	0.800572	3.01307	32697016|32697126|32697012|32697009|32697020|32697116|32697026|32697103|32697111	chr1	32696812	32697110	AluSp	+
adrenal_gland_female_adult_53_years	chr14	51101173	51101221	-	51101220	2	2	9	0.423832	2.50326	51101003|51100708|51100685|51100997|51101036|51100998	chr14	51101056	51101367	AluJb	-
adrenal_gland_female_adult_53_years	chr14	65400846	65400884	+	65400878	2	2	11	0.518017	3.27761	65401127|65401165|65401179|65401178|65401180|65401177|65401176|65401141|65401182|65401517	chr14	65400779	65401095	AluSx	+
adrenal_gland_female_adult_53_years	chr1	46601419	46601420	+	46601419	12	12	12	0.56511	3.02205	46601597|46601593|46601594|46601675|46601670|46601684|46601599|46601681|46601596	chr1	46601421	46601720	AluSg	+
adrenal_gland_female_adult_53_years	chr14	68144488	68144658	-	68144625	6	7	54	2.54299	4.74999	68144279|68144293|68144298|68143793|68144291|68144156|68144372|68144289|68144160|68144317|68144319|68144292|68144211|68144266|68144367|68144307|68144308|68144210|68144306|68144300|68144333|68144296|68144294|68144167|68144176|68144430|68144310|68144315|68144295|68144297|68144301	chr14	68144496	68144578	AluSq10	-
adrenal_gland_female_adult_53_years	chr1	48662020	48662021	-	48662020	918	920	923	43.4664	3.92487	48661863|48661878|48661869|48661872|48661877|48661870|48661865|48661876|48661898|48661879|48661871|48661881|48661880|48661868|48661873|48661867|48661866|48661882|48661874|48661875	chr1	48661883	48662019	FLAM_C	-
adrenal_gland_female_adult_53_years	chr15	40711175	40711212	+	40711175	8	11	14	0.659295	3.39275	40711359|40711533|40711508|40711358|40711347|40711355|40711379|40711356|40711534|40711591|40711357	chr15	40711050	40711356	AluSq2	+
adrenal_gland_female_adult_53_years	chr15	42707519	42707521	-	42707519	6	10	10	0.470925	3.12193	42706969|42707191|42706915|42707196|42707208|42707206|42706909|42706914|42707197	chr15	42707320	42707619	AluSq2	-
adrenal_gland_female_adult_53_years	chr15	45899813	45899844	+	45899833	4	4	8	0.37674	2.5	45900247|45900039|45900041|45900254|45900078|45900256	chr15	45899690	45899989	AluSc	+
adrenal_gland_female_adult_53_years	chr15	64434172	64434216	+	64434196	2	2	10	0.470925	2.9477	64434627|64434554|64434669|64434612|64434613|64434584|64434785|64434776	chr15	64434255	64434536	AluJo	+
adrenal_gland_female_adult_53_years	chr15	65869528	65869617	+	65869578	9	9	35	1.64824	4.31497	65870381|65869800|65870384|65869803|65869792|65869780|65869797|65869805|65869773|65869908|65869811|65869795|65869798|65869796|65869775|65869789|65870376|65870382|65869779|65869790|65869799|65869786	chr15	65869491	65869764	AluJr	+
adrenal_gland_female_adult_53_years	chr15	89744071	89744084	+	89744071	5	5	8	0.37674	2.80735	89744541|89744232|89744344|89744363|89744205|89744341|89744343	chr15	89744031	89744326	AluSq	+
adrenal_gland_female_adult_53_years	chr1	61523585	61523586	-	61523585	10	10	10	0.470925	2.64644	61523288|61523447|61523298|61523422|61523347|61523297|61523244	chr1	61523296	61523586	AluSq2	-
adrenal_gland_female_adult_53_years	chr16	19513926	19513944	-	19513942	6	8	10	0.470925	3.12193	19513488|19513597|19513435|19513489|19513491|19513486|19513479|19513483|19513772	chr16	19513696	19513980	AluJr	-
adrenal_gland_female_adult_53_years	chr16	29708880	29709098	+	29708934	14	19	101	4.75634	4.58925	29709339|29709338|29709321|29709346|29709201|29709131|29709332|29709308|29709312|29709318|29709314|29709317|29709313|29709330|29709327|29709319|29709306|29709320|29709325|29709322|29709238|29709331|29709311|29709316|29709315|29709329|29709199|29709371|29709323|29709200|29709310|29709328|29709309	chr16	29709025	29709334	AluSz	+
adrenal_gland_female_adult_53_years	chr16	3313661	3313667	-	3313666	11	11	13	0.612202	3.2389	3313418|3313413|3313417|3313353|3313358|3313411|3313351|3313422|3313360|3313462	chr16	3313366	3313666	AluSg	-
adrenal_gland_female_adult_53_years	chr16	67845025	67845026	-	67845025	223	224	226	10.6429	2.62896	67844881|67844883|67844878|67844884|67844876|67844877|67844885|67844882|67844880|67844879	chr16	67844890	67845026	FLAM_C	-
adrenal_gland_female_adult_53_years	chr16	69496904	69496941	+	69496912	3	3	11	0.518017	2.84535	69497325|69497551|69497117|69497530|69497199|69497401|69497608|69497124	chr16	69496864	69496990	AluJr	+
adrenal_gland_female_adult_53_years	chr17	19579732	19579771	+	19579763	4	4	12	0.56511	3.09579	19580225|19579964|19580024|19580223|19580256|19580307|19580086|19580216|19580219	chr17	19579684	19579981	AluJb	+
adrenal_gland_female_adult_53_years	chr17	40555223	40555298	-	40555239	3	3	15	0.706387	3.24022	40554814|40555086|40555119|40554711|40554857|40554866|40554937|40554859|40555053|40554819|40554815	chr17	40555091	40555246	AluJr	-
adrenal_gland_female_adult_53_years	chr17	40555710	40555821	-	40555820	16	16	44	2.07207	4.72243	40555342|40555631|40555639|40555555|40555394|40555386|40555389|40555649|40555536|40555646|40555535|40555518|40555659|40555391|40555533|40555313|40555641|40555399|40555298|40555628|40555384|40555642|40555607|40555647|40555380|40555648|40555392|40555401|40555407	chr17	40555639	40555958	AluSx	-
adrenal_gland_female_adult_53_years	chr17	7484854	7485178	+	7485056	22	27	165	7.77026	5.17366	7485275|7485334|7485286|7485328|7485288|7485283|7485333|7485285|7485295|7485339|7485329|7485279|7485108|7485284|7485335|7485343|7485332|7485276|7485271|7485154|7485281|7485160|7485277|7485269|7485337|7485197|7485338|7485268|7485274|7485273|7485278|7485330|7485331|7485411|7485345|7485410|7485400|7485340|7485280|7485341|7485336|7485270|7485287|7485327|7485267|7485293|7485291|7485282|7485272	chr17	7484958	7485270	AluSz	+
adrenal_gland_female_adult_53_years	chr18	64289290	64289291	+	64289290	259	263	265	12.4795	3.37112	64289478|64289480|64289471|64289457|64289453|64289461|64289469|64289438|64289455|64289477|64289433|64289470|64289476|64289473|64289474|64289475|64289448|64289454|64289464|64289439|64289465|64289462|64289472|64289463	chr18	64289291	64289427	FLAM_C	+
adrenal_gland_female_adult_53_years	chr19	11276551	11276616	-	11276606	4	4	12	0.56511	3.02205	11276231|11276236|11276123|11276238|11276233|11276230|11276262|11276234|11276428	chr19	11276240	11276529	AluJo	-
adrenal_gland_female_adult_53_years	chr19	45596075	45596091	-	45596075	4	6	13	0.612202	3.08496	45595704|45595441|45595375|45595474|45595548|45595475|45595472|45595399|45595438	chr19	45595752	45596044	AluJr	-
adrenal_gland_female_adult_53_years	chr19	50320869	50320898	+	50320897	6	6	12	0.56511	2.84535	50321220|50321200|50321310|50321073|50321864|50321203|50321030|50321295	chr19	50320898	50321208	AluSx1	+
adrenal_gland_female_adult_53_years	chr19	50640583	50640588	-	50640583	127	127	157	7.39352	4.32469	50640369|50640361|50640367|50640370|50640401|50640362|50640436|50640359|50640397|50640433|50640422|50640365|50640371|50640360|50640379|50640438|50640399|50640400|50640383|50640398|50640423|50640364|50640358|50640375|50640368|50640372|50640410|50640405|50640384|50640380|50640366|50640363|50640402	chr19	50640452	50640584	AluYa5	-
adrenal_gland_female_adult_53_years	chr20	35519013	35519145	-	35519081	9	9	72	3.39066	4.56415	35518799|35518864|35518749|35518835|35518673|35518820|35518859|35518853|35518877|35518857|35518818|35518862|35518855|35518828|35518824|35518807|35518863|35518684|35518861|35518804|35518873|35518827|35518830|35518682|35518829|35518832|35518806|35518866|35518810|35518854|35518879|35518865	chr20	35518867	35519179	AluSq2	-
adrenal_gland_female_adult_53_years	chr20	47863605	47863626	-	47863605	18	18	26	1.2244	3.05288	47863071|47863338|47862957|47863361|47863075|47863217|47863282|47863362|47863284|47863074|47863025	chr20	47863409	47863703	AluSq2	-
adrenal_gland_female_adult_53_years	chr20	54942417	54942906	+	54942456	20	21	224	10.5487	5.42855	54942981|54943460|54942754|54943064|54942948|54942945|54943366|54942711|54942872|54943657|54943438|54943061|54943708|54942752|54943396|54942758|54943348|54943070|54942954|54942950|54942952|54943068|54942979|54942704|54943346|54943063|54943349|54942756|54942990|54943332|54943478|54942956|54943345|54942702|54942705|54942980|54943614|54943347|54942951|54942947|54942762|54943585|54942724|54943608|549…	chr20	54942412	54942704	AluSz	+
adrenal_gland_female_adult_53_years	chr2	102793297	102793413	+	102793303	8	9	39	1.83661	4.73451	102793649|102793522|102794010|102793663|102794016|102793898|102793594|102793656|102793646|102793645|102793549|102794017|102793550|102793520|102793889|102793548|102793529|102793946|102793642|102794011|102793795|102793580|102793525|102793774|102793638|102794009|102793729|102793581|102793790	chr2	102793443	102793731	AluSx	+
adrenal_gland_female_adult_53_years	chr2	114467690	114467766	-	114467736	4	4	19	0.894757	3.72161	114467625|114467402|114467237|114467467|114467560|114467159|114467551|114467181|114467500|114467373|114467553|114467499|114467343|114467513	chr2	114467385	114467679	AluJo	-
adrenal_gland_female_adult_53_years	chr2	131186082	131186130	-	131186096	7	7	37	1.74242	4.7391	131185606|131185611|131185532|131185622|131185632|131185542|131185631|131185652|131185639|131185646|131185750|131185304|131185640|131185816|131185936|131185642|131185938|131185633|131185651|131185636|131185644|131185629|131185635|131185634|131185627|131185905|131185637|131185656|131185810	chr2	131185946	131186078	AluY	-
adrenal_gland_female_adult_53_years	chr2	131450546	131450570	+	131450561	1	1	6	0.282555	2.58496	131450755|131451315|131450897|131451009|131451039|131459931	chr2	131450583	131450715	AluY	+
adrenal_gland_female_adult_53_years	chr2	131905020	131905059	+	131905020	3	4	12	0.56511	3.09579	131905270|131905457|131905521|131905263|131905266|131905265|131905261|131905291|131905531	chr2	131905089	131905386	AluY	+
adrenal_gland_female_adult_53_years	chr2	136664913	136664960	-	136664948	3	4	17	0.800572	3.26393	136664517|136664520|136664519|136664518|136664521|136664730|136664526|136664840|136664525|136664653|136664656	chr2	136664808	136664874	AluJo	-
adrenal_gland_female_adult_53_years	chr21	46190534	46190536	-	46190535	6	9	9	0.423832	3.16993	46190243|46190124|46190123|46190331|46190318|46190245|46190244|46190329|46190323	chr21	46190334	46190631	AluSc8	-
adrenal_gland_female_adult_53_years	chr2	203429538	203429572	+	203429551	4	4	16	0.75348	3.75	203429921|203429879|203429914|203430192|203430037|203430038|203429945|203429979|203430187|203430182|203429976|203429880|203429913|203430282	chr2	203429488	203429789	AluSc8	+
adrenal_gland_female_adult_53_years	chr2	26952494	26952532	+	26952520	2	2	7	0.329647	2.80735	26953248|26953246|26953256|26953250|26952969|26952864|26952863	chr2	26952421	26952720	AluJb	+
adrenal_gland_female_adult_53_years	chr2	26960429	26960430	+	26960429	17	17	17	0.800572	3.57247	26960761|26960631|26960754|26960718|26960753|26960760|27907976|26960763|26960755|26960566|26960746|26960636|26960665	chr2	26960429	26960717	AluSg	+
adrenal_gland_female_adult_53_years	chr2	27185027	27185028	+	27185027	6	6	6	0.282555	2.58496	27185222|27185345|27185315|27185324|27185299|27185202	chr2	27185028	27185339	AluY	+
adrenal_gland_female_adult_53_years	chr2	38961130	38961237	+	38961130	9	9	49	2.30753	4.63565	38961637|38961634|38961642|38961741|38961655|38961734|38961670|38961428|38961740|38961499|38961662|38961725|38961667|38961742|38961425|38961643|38961502|38961437|38961632|38961663|38961738|38961739|38961680|38961661|38961424|38961735|38961660|38961653|38961446	chr2	38961258	38961555	AluSc8	+
adrenal_gland_female_adult_53_years	chr2	70504745	70504878	+	70504781	7	7	38	1.78951	4.11137	70505013|70505381|70505167|70505153|70505373|70505369|70504992|70505152|70505371|70505005|70505042|70505016|70505014|70505159|70505372|70505374|70504991|70505160|70505017|70505149|70505221|70505008	chr2	70504783	70504888	AluSq2	+
adrenal_gland_female_adult_53_years	chr2	70506997	70507010	+	70506997	5	5	9	0.423832	2.72548	70507411|70507322|70507331|70507324|70507325|70507323|70507410	chr2	70506940	70507234	AluSz	+
adrenal_gland_female_adult_53_years	chr3	128399477	128399482	-	128399477	9	9	13	0.612202	2.85539	128399251|128399207|128399139|128399192|128399138|128399148|128399210|128399145	chr3	128399192	128399478	AluSg	-
adrenal_gland_female_adult_53_years	chr3	156259322	156259339	-	156259338	3	4	9	0.423832	2.5	156258577|156258572|156258945|156259071|156259069|156258589	chr3	156259206	156259414	AluSx1	-
adrenal_gland_female_adult_53_years	chr3	172223843	172223941	-	172223936	4	5	26	1.2244	3.65739	172223638|172223620|172223713|172223614|172223641|172223612|172223613|172223611|172223386|172223635|172223710|172223384|172223634|172223615|172223545	chr3	172223515	172223813	AluSc	-
adrenal_gland_female_adult_53_years	chr3	190142437	190142439	+	190142437	11	13	13	0.612202	2.66123	190142599|190142585|190142769|190142772|190142603|190142768|190142751	chr3	190142438	190142703	AluSx1	+
adrenal_gland_female_adult_53_years	chr3	52289090	52289129	-	52289122	5	5	19	0.894757	3.68188	52288855|52288853|52288876|52288870|52288711|52288898|52288878|52288779|52288894|52288891|52288883|52288577|52288889|52288866	chr3	52288956	52289257	AluSp	-
adrenal_gland_female_adult_53_years	chr3	72567507	72567508	+	72567507	25	25	26	1.2244	3.13947	72567835|72567828|72567829|72567832|72567831|72567822|72567820|72567834|72567836|72567830	chr3	72567507	72567800	AluSg	+
adrenal_gland_female_adult_53_years	chr4	154096472	154096473	-	154096472	10	10	10	0.470925	2.84644	154096128|154096156|154096150|154096242|154096293|154096294|154096290|154096151	chr4	154096139	154096471	AluSx	-
adrenal_gland_female_adult_53_years	chr4	39552181	39552211	-	39552190	2	2	7	0.329647	2.52164	39551469|39551466|39551468|39551836|39551888|39551894	chr4	39551898	39552201	AluSx	-
adrenal_gland_female_adult_53_years	chr5	150561066	150561138	-	150561112	10	16	58	2.73136	3.21599	150560629|150560657|150560754|150560621|150560625|150560783|150560644|150560626|150560622|150560658|150560660|150560624|150560627|150560770|150560652|150560623	chr5	150560771	150561076	AluY	-
adrenal_gland_female_adult_53_years	chr5	167982387	167982457	-	167982423	3	3	10	0.470925	2.72193	167982178|167982060|167982103|167982104|167982064|167982061|167981753	chr5	167982256	167982547	AluSx	-
adrenal_gland_female_adult_53_years	chr5	42993325	42993383	-	42993340	8	9	28	1.31859	4.06611	42974645|42992916|42993036|42993035|42993061|42993185|42993031|42993028|42992971|42992961|42993001|42993029|42992968|42993024|42993022|42993033|42992382|42993030|42993279	chr5	42993009	42993319	AluSx4	-
adrenal_gland_female_adult_53_years	chr5	79438328	79438357	-	79438328	5	5	11	0.518017	2.91398	79438163|79437968|79438165|79438145|79437533|79438061|79438154|79438148	chr5	79438110	79438311	AluSz	-
adrenal_gland_female_adult_53_years	chr6	111022127	111022128	+	111022127	28	28	29	1.36568	4.2804	111022452|111022495|111022523|111022356|111022341|111022349|111022460|111022463|111022297|111022516|111022386|111022319|111022430|111022377|111022391|111022388|111022434|111022464|111022427|111022350|111022560	chr6	111022127	111022414	AluSg4	+
adrenal_gland_female_adult_53_years	chr6	122765420	122765818	-	122765609	22	22	198	9.32431	5.1981	122765093|122765430|122765403|122764580|122765175|122765182|122765657|122765136|122765432|122765660|122765431|122765118|122765172|122765485|122765230|122765434|122764980|122765132|122765096|122765119|122765487|122765181|122764986|122765638|122765265|122765139|122765429|122765466|122765144|122765121|122765141|122765255|122765133|122765138|122765186|122765185|122765486|122764981|122765106|122765269…	chr6	122765165	122765430	AluJb	-
adrenal_gland_female_adult_53_years	chr6	126300712	126300714	+	126300712	3	6	7	0.329647	2.58496	126301210|126301069|126301208|126301061|126301070|126301067	chr6	126300617	126300912	AluSg	+
adrenal_gland_female_adult_53_years	chr6	144148941	144148995	+	144148975	5	5	20	0.941849	3.92193	144149470|144149298|144149260|144149143|144149466|144149267|144149136|144149330|144149137|144149353|144149400|144149331|144149456|144149334|144149459|144149462	chr6	144148997	144149288	AluSz	+
adrenal_gland_female_adult_53_years	chr6	149912176	149912243	+	149912201	3	3	16	0.75348	3.57782	149912568|149912501|149912502|149912574|149912481|149912553|149912808|149912459|149912554|149912458|149912503|149912500|149912713	chr6	149912148	149912439	AluSc	+
adrenal_gland_female_adult_53_years	chr6	26273743	26273744	+	26273743	14	14	14	0.659295	2.55666	26274006|26274009|26274032|26274033|26273947|26274034|26274019|26274021	chr6	26273743	26274032	AluSq2	+
adrenal_gland_female_adult_53_years	chr6	2903050	2903051	-	2903050	612	614	615	28.9619	4.13342	2902888|2902755|2902713|2902798|2902757|2902727|2902735|2902847|2902951|2902845|2902944|2902712|2902746|2902870|2902738|2902915|2902747|2902734|2902745|2902690|2902742|2902764|2902741|2902754|2902795|2902717|2902796|2902750|2902753|2902736|2902730|2902726|2902715|2902716|2902723|2902744|2902849|2902752|2902737|2902759|2902886|2902760|2902801|2902739|2902714|2902743|2902797|2902721|2902770|2902718…	chr6	2902742	2903051	AluSz	-
adrenal_gland_female_adult_53_years	chr6	30460787	30460887	+	30460848	23	24	81	3.81449	5.20233	30461684|30461138|30461344|30461234|30461094|30460970|30460966|30460968|30460969|30461099|30461147|30461095|30461190|30461185|30460971|30461100|30461241|30461096|30461310|30461143|30461130|30461306|30461135|30460961|30461142|30460984|30460963|30460965|30461089|30460973|30461188|30460964|30461484|30461102|30461145|30461225|30461482|30461187|30461144|30461140|30461184|30461098|30461141|30461149	chr6	30460788	30461101	AluSc8	+
adrenal_gland_female_adult_53_years	chr6	30593565	30593694	+	30593668	5	5	40	1.8837	4.31346	30594025|30594033|30593977|30593925|30594155|30593883|30593905|30593902|30593887|30593888|30593889|30593907|30593906|30593898|30593885|30593886|30593974|30593891|30593901|30593899|30593884|30593912	chr6	30593595	30593888	AluJb	+
adrenal_gland_female_adult_53_years	chr6	34251132	34251156	-	34251132	3	3	7	0.329647	2.52164	34250453|34250443|34250768|34250785|34250445|34250476	chr6	34250974	34251279	AluSg	-
adrenal_gland_female_adult_53_years	chr6	34254718	34254729	-	34254721	9	14	19	0.894757	2.85828	34254509|34254521|34254505|34254512|34254508|34254432|34254334|34254515	chr6	34254566	34254853	AluSq2	-
adrenal_gland_female_adult_53_years	chr6	34842087	34842121	+	34842119	4	5	9	0.423832	2.72548	34842647|34842459|34842339|34842462|34842476|34842471|34842474	chr6	34842023	34842325	AluSc	+
adrenal_gland_female_adult_53_years	chr6	36893947	36893978	+	36893977	2	2	9	0.423832	2.72548	36894348|36894233|36894161|36894165|36894332|36894329|36894335	chr6	36894027	36894336	AluSx1	+
adrenal_gland_female_adult_53_years	chr6	42855031	42855080	+	42855057	3	4	9	0.423832	2.9477	42855627|42855367|42855356|42855620|42855442|42855350|42855802|42855429	chr6	42855038	42855333	AluSp	+
adrenal_gland_female_adult_53_years	chr6	86354613	86354614	+	86354613	10	10	10	0.470925	2.64644	86354791|86354872|86354806|86354945|86354869|86354762|86354817	chr6	86354613	86354915	AluY	+
adrenal_gland_female_adult_53_years	chr7	138250978	138250979	+	138250978	7	7	8	0.37674	2.80735	138251236|138251185|138251194|138251195|138251190|138251234|138251189	chr7	138250978	138251216	AluSz	+
adrenal_gland_female_adult_53_years	chr7	138987244	138987247	+	138987244	3	6	8	0.37674	2.80735	138987542|138987523|138987537|138987530|138987539|138987544|138987533	chr7	138987149	138987447	AluY	+
adrenal_gland_female_adult_53_years	chr7	158524308	158524373	-	158524316	4	4	19	0.894757	3.57662	158523916|158523914|158523733|158524105|158524119|158523994|158524083|158523911|158523991|158523995|158523952|158523913|158523988	chr7	158523995	158524297	AluSx	-
adrenal_gland_female_adult_53_years	chr7	35672891	35672913	-	35672901	4	4	8	0.37674	2.5	35672511|35672640|35672641|35672647|35672514|35672643	chr7	35672678	35672978	AluSz	-
adrenal_gland_female_adult_53_years	chr7	6488139	6488179	-	6488139	6	6	22	1.03603	3.01043	6487715|6487790|6487760|6487766|6487769|6487744|6487776|6487738|6487737|6487739	chr7	6487830	6488138	AluSz	-
adrenal_gland_female_adult_53_years	chr7	99172975	99173003	+	99172975	3	5	10	0.470925	2.72548	99173200|99173695|99173277|99173206|99173194|99173204|99173202	chr7	99172879	99173189	AluSg	+
adrenal_gland_female_adult_53_years	chr8	11700309	11700362	-	11700343	2	2	12	0.56511	3.25163	11700045|11700161|11700047|11700043|11700121|11700101|11700114|11700048|11700152|11700125	chr8	11700138	11700445	AluSq2	-
adrenal_gland_female_adult_53_years	chr8	144536879	144536883	-	144536879	21	21	24	1.13022	3.83496	144536737|144536702|144536680|144536731|144536760|144536664|144536700|144536671|144536759|144536757|144536753|144536738|144536672|144536727|144536701|144536477	chr8	144536572	144536880	AluY	-
adrenal_gland_female_adult_53_years	chr8	27167215	27167218	+	27167217	10	14	14	0.659295	2.89629	27167536|27167516|27167514|27167539|27167417|27167421|27167543|27167429	chr8	27167217	27167518	AluSz6	+
adrenal_gland_female_adult_53_years	chr8	37613559	37613588	+	37613569	2	2	6	0.282555	2.58496	37614053|37614050|37614047|37614051|37614049|37614052	chr8	37613425	37613716	AluSx1	+
adrenal_gland_female_adult_53_years	chr8	38000156	38000666	-	38000297	22	31	334	15.7289	5.6943	38000237|38000047|38000038|37999719|38000015|37999659|38000018|38000022|38000043|38000014|38000046|38000024|38000271|38000039|38000210|38000036|38000262|38000349|38000211|38000019|38000009|38000052|38000026|37999795|38000033|38000239|38000034|38000145|38000136|38000028|38000013|38000137|38000159|38000152|38000017|38000011|38000135|38000049|37999753|38000025|38000032|38000023|38000238|38000143|380…	chr8	38000050	38000328	AluSx	-
adrenal_gland_female_adult_53_years	chr8	38001110	38001231	-	38001110	7	7	37	1.74242	3.86865	38000613|38000602|38000536|38000612|38000605|38000607|38000606|38000617|38000472|38000604|38001072|38000976|38000981|38000867|38000608|38000603|38000547|38000614|38000949|38000859	chr8	38000823	38001121	AluSc8	-
adrenal_gland_female_adult_53_years	chr9	111781250	111781317	-	111781316	4	4	19	0.894757	3.46132	111780931|111780497|111781020|111780760|111781019|111780932|111780827|111780681|111780857|111781143|111781049|111781013	chr9	111781019	111781329	AluJb	-
adrenal_gland_female_adult_53_years	chr9	21004225	21004245	-	21004244	3	3	9	0.423832	2.5	21003938|21003969|21003939|21003732|21003940|21003932	chr9	21004013	21004305	AluSz	-
adrenal_gland_female_adult_53_years	chr9	91618953	91619043	+	91618960	6	7	27	1.2715	4.23637	91619442|91619708|91619072|91619203|91619496|91619495|91619549|91619339|91619362|91619352|91619180|91619698|91619354|91619494|91619359|91619553|91619503|91619551|91619235|91619358|91619548	chr9	91619031	91619340	AluSx	+
adrenal_gland_female_adult_53_years	chrX	135748668	135748702	-	135748701	7	11	17	0.800572	2.81631	135748235|135748222|135748228|135748229|135748226|135748227|135748352|135748223|135748224	chrX	135748518	135748679	AluJr	-
adrenal_gland_female_adult_53_years	chrX	148560747	148560785	-	148560748	14	16	21	0.988942	3.1037	148560349|148560346|148560348|148560350|148560354|148560345|148560344|148560342|148560352|148560347	chrX	148560538	148560845	AluSg7	-
adrenal_gland_female_adult_53_years	chrX	153276829	153276853	-	153276829	2	2	7	0.329647	2.80735	153276192|153276573|153276458|153276541|153276496|153276457|153276645	chrX	153276542	153276840	AluJb	-
adrenal_gland_female_adult_53_years	chrX	16779675	16779690	+	16779682	4	4	7	0.329647	2.80735	16779898|16779857|16779826|16779859|16779877|16780044|16779977	chrX	16779689	16779800	AluSx	+
adrenal_gland_female_adult_53_years	chrX	48436260	48436311	+	48436284	3	3	16	0.75348	2.7744	48436615|48436498|48436503|48436623|48436614|48436500|48436502|48436501	chrX	48436270	48436480	AluSx	+
adrenal_gland_female_adult_53_years	chrX	73067401	73067414	-	73067409	2	5	8	0.37674	2.5	73066976|73066914|73067216|73067219|73066980|73066978	chrX	73067239	73067354	FLAM_C	-
adrenal_gland_male_adult_37_years	chr10	34633537	34633538	-	34633537	6	6	6	0.6459	2.58496	34633203|34633209|34633205|34633202|34633204|34633211	chr10	34633198	34633508	AluSx	-
adrenal_gland_male_adult_37_years	chr10	89461389	89461413	-	89461389	16	16	23	2.47595	2.61164	89461075|89461092|89461102|89461097|89461083|89461101|89461084|89461088|89461105	chr10	89461189	89461481	AluJr	-
adrenal_gland_male_adult_37_years	chr12	101623894	101623895	+	101623894	32	33	34	3.6601	3.26613	101624169|101624144|101624153|101624186|101624100|101624188|101624145|101624149|101624051|101624148|101624081|101624187|101624035	chr12	101623895	101624187	AluSz	+
adrenal_gland_male_adult_37_years	chr14	37598032	37598033	-	37598032	9	9	9	0.968849	2.50326	37597751|37597759|37597753|37597755|37597757|37597761	chr14	37597785	37598092	AluJb	-
adrenal_gland_male_adult_37_years	chr1	48662020	48662021	-	48662020	683	685	685	73.7402	3.9122	48661863|48661876|48661884|48661869|48661872|48661877|48661870|48661861|48661882|48661879|48661871|48661881|48661880|48661868|48661873|48661867|48661866|48661874|48661864|48661875|48661878	chr1	48661883	48662019	FLAM_C	-
adrenal_gland_male_adult_37_years	chr16	67845025	67845026	-	67845025	121	122	122	13.1333	2.6712	67844881|67844883|67844878|67844884|67844876|67844877|67844885|67844882|67844880|67844879	chr16	67844890	67845026	FLAM_C	-
adrenal_gland_male_adult_37_years	chr1	71533760	71533761	-	71533760	9	9	9	0.968849	2.50326	71533565|71533560|71533561|71533563|71533564|71533562	chr1	71533560	71533847	AluJo	-
adrenal_gland_male_adult_37_years	chr17	35763622	35763623	-	35763622	7	7	7	0.753549	2.52164	35763461|35763453|35763457|35763459|35763460|35763458	chr17	35763457	35763765	AluJb	-
adrenal_gland_male_adult_37_years	chr18	64289290	64289291	+	64289290	254	256	256	27.5584	3.26247	64289478|64289462|64289465|64289464|64385612|64289469|64289455|64289477|64289437|64289480|64385545|64289458|64289460|64385608|64289470|64289476|64289448|64289473|64289474|64289475|64289471|64289454|64289438|64289472|64385428|64289463	chr18	64289291	64289427	FLAM_C	+
adrenal_gland_male_adult_37_years	chr19	50640583	50640588	-	50640583	22	22	30	3.2295	2.72603	50640368|50640359|50640383|50640370|50640358|50640362|50640365|50640360	chr19	50640452	50640584	AluYa5	-
adrenal_gland_male_adult_37_years	chr19	54688219	54688220	-	54688219	7	7	7	0.753549	2.52164	54688043|54688046|54688044|54688049|54688047|54688045	chr19	54688034	54688220	AluSz6	-
adrenal_gland_male_adult_37_years	chr20	19836977	19836978	+	19836977	18	18	18	1.9377	2.55218	19837175|19837181|19837180|19837177|19837178|19837176|19837179|19837171	chr20	19836961	19837190	AluJr	+
adrenal_gland_male_adult_37_years	chr20	35519065	35519112	-	35519095	8	8	23	2.47595	2.73143	35518863|35518799|35518881|35518806|35518858|35518809|35518856|35518869|35518843	chr20	35518867	35519179	AluSq2	-
adrenal_gland_male_adult_37_years	chr2	187045983	187045984	-	187045983	8	8	8	0.861199	2.75	187045818|187045816|187045817|187045822|187045819|187045805|187045820	chr2	187045677	187045963	AluY	-
adrenal_gland_male_adult_37_years	chr22	42997234	42997235	+	42997234	126	127	127	13.6715	2.83612	42997398|42997395|42997404|42997403|42997402|42997392|42997396|42997399|42997391|42997394|42997400|42997397	chr22	42997234	42997370	FLAM_C	+
adrenal_gland_male_adult_37_years	chr3	141202696	141202697	+	141202696	13	13	13	1.39945	2.93121	141202981|141202972|141202971|141202985|141202988|141202984|141202974|141202973	chr3	141202696	141202997	AluYc	+
adrenal_gland_male_adult_37_years	chr4	181196408	181196430	+	181196425	6	6	14	1.5071	2.89629	181196566|181196867|181196548|181196663|181196864|181196565|181196866|181196860	chr4	181196405	181196546	AluSx	+
adrenal_gland_male_adult_37_years	chr5	142605728	142605729	+	142605728	18	18	18	1.9377	2.61437	142606069|142606067|142606065|142606070|142606064|142606068|142606066	chr5	142605764	142606074	AluY	+
adrenal_gland_male_adult_37_years	chr5	88271358	88271359	+	88271358	127	127	127	13.6715	2.85562	88271519|88271517|88271522|88271513|88271521|88271518|88271520|88271523|88271515|88271506|88271525|88271511|88271514	chr5	88271358	88271526	FLAM_C	+
adrenal_gland_male_adult_37_years	chr6	122765332	122765390	-	122765370	17	17	42	4.5213	2.51654	122765184|122765137|122765123|122764848|122765121|122765136|122765138|122765140	chr6	122765165	122765430	AluJb	-
adrenal_gland_male_adult_37_years	chr6	160106598	160106599	-	160106598	7	7	7	0.753549	2.52164	160106265|160106263|160106262|160106264|160106266|160106267	chr6	160106256	160106571	AluSp	-
adrenal_gland_male_adult_37_years	chr6	2903050	2903051	-	2903050	83	86	86	9.25789	3.02189	2902715|2902745|2902742|2902739|2902716|2902714|2902743|2902718|2902752|2902719|2902746|2902740	chr6	2902742	2903051	AluSz	-
adrenal_gland_male_adult_37_years	chr7	104981057	104981058	-	104981057	8	8	8	0.861199	2.75	104980849|104980851|104161143|104980850|104980847|104980846|104980848	chr7	104980836	104981190	AluJb	-
adrenal_gland_male_adult_37_years	chr8	126339312	126339313	+	126339312	15	15	15	1.61475	2.54926	126339523|126339519|126339524|126339520|126339522|126339521|126339518	chr8	126339222	126339537	AluSx1	+
adrenal_gland_male_adult_37_years	chr8	38000211	38000294	-	38000211	20	20	76	8.18139	3.66545	38000009|38000026|38000029|38000019|38000014|38000018|38000042|38000021|38000024|38000016|38000017|38000030|38000027|38000040|38000050|38000025|38000031	chr8	38000050	38000328	AluSx	-
adrenal_gland_male_adult_37_years	chr9	99680331	99680332	-	99680331	15	15	15	1.61475	2.55591	99680174|99680178|99680169|99680172|99680180|99680176|99680170|99680182	chr9	99680211	99680323	AluJb	-
adrenal_gland_male_adult_37_years	chrX	118755896	118755897	-	118755896	9	9	9	0.968849	2.50326	118755411|118755416|118755410|118755409|118755414|118755412	chrX	118755784	118755900	AluJb	-
adrenal_gland_male_adult_54_years	chr10	104586829	104586845	-	104586836	3	4	18	0.684645	3.49923	104586564|104586339|104586341|104586596|104586556|104586270|104586522|104586555|104586568|104586607|104586589|104586629	chr10	104586682	104586849	AluJb	-
adrenal_gland_male_adult_54_years	chr10	104622881	104622909	+	104622908	5	8	14	0.532502	2.54952	104623514|104623561|104623198|104623155|104623174|104623199|104623176	chr10	104622810	104623121	AluSg4	+
adrenal_gland_male_adult_54_years	chr10	104661811	104661860	+	104661849	3	3	11	0.418394	2.55034	104662264|104662267|104662262|104662263|104662275|104662261|104662266	chr10	104661796	104661975	AluJo	+
adrenal_gland_male_adult_54_years	chr10	104662017	104662031	+	104662025	12	13	24	0.91286	2.9521	104662264|104662255|104662262|104662263|104662287|104662272|104662270|104662260|104662328|104662265	chr10	104661977	104662269	AluSz	+
adrenal_gland_male_adult_54_years	chr10	13179115	13179180	+	13179131	20	22	79	3.00483	4.2507	13179300|13179312|13179290|13179551|13179521|13179284|13179295|13179569|13179285|13179539|13179517|13179550|13179299|13179305|13179301|13179298|13179683|13179573|13179308|13179572|13179287|13179296|13179306|13179571|13179570|13179293|13179566|13179294|13179292|13179297	chr10	13178997	13179298	AluSz	+
adrenal_gland_male_adult_54_years	chr10	27400400	27400458	-	27400432	2	4	13	0.494466	3.2389	27400148|27400256|27399738|27399938|27400146|27399662|27399901|27399603|27399601|27399574	chr10	27400285	27400417	AluSx	-
adrenal_gland_male_adult_54_years	chr10	50223492	50223510	-	50223503	6	6	11	0.418394	2.91398	50223277|50223040|50223283|50223041|50223287|50223279|50223018|50223285	chr10	50223164	50223461	AluY	-
adrenal_gland_male_adult_54_years	chr10	5681411	5681429	-	5681428	6	6	8	0.304287	2.75	5681036|5681159|5681033|5681259|5681277|5680873|5680874	chr10	5681350	5681408	AluSx	-
adrenal_gland_male_adult_54_years	chr10	70043776	70043805	-	70043776	2	2	6	0.228215	2.58496	70043279|70043511|70043510|70043112|70043119|70043508	chr10	70043522	70043803	AluSx	-
adrenal_gland_male_adult_54_years	chr10	93042013	93042057	+	93042056	11	11	19	0.722681	3.47135	93042309|93042306|93042300|93042270|93042304|93042299|93042257|93042271|93042308|93042340|93042307|93042305	chr10	93041959	93042249	AluSz	+
adrenal_gland_male_adult_54_years	chr11	10535548	10535606	-	10535554	3	3	12	0.45643	3.08496	10535069|10534998|10535068|10535219|10534914|10535437|10535065|10535164|10535027	chr11	10535224	10535521	AluSx1	-
adrenal_gland_male_adult_54_years	chr11	111892535	111892536	+	111892535	9	9	9	0.342322	3.16993	111892842|111892844|111892885|111893153|111893018|111892845|111893048|111893267|111893173	chr11	111892416	111892721	AluJr	+
adrenal_gland_male_adult_54_years	chr11	121183310	121183337	+	121183336	2	3	6	0.228215	2.58496	121183821|121183533|121183746|121183752|121183536|121183749	chr11	121183383	121183462	AluJo	+
adrenal_gland_male_adult_54_years	chr11	130744161	130744168	-	130744167	5	5	7	0.266251	2.58496	130743826|130743955|130743797|130743963|130743950|130743949	chr11	130743914	130744216	AluJo	-
adrenal_gland_male_adult_54_years	chr1	115248377	115248425	-	115248394	5	6	19	0.722681	3.11583	115248089|115247859|115247838|115248102|115248087|115248091|115248090|115247957|115248103|115248084	chr1	115248250	115248409	AluSx3	-
adrenal_gland_male_adult_54_years	chr11	17109949	17109960	-	17109959	5	5	11	0.418394	3.27761	17109610|17109493|17109620|17109630|17109494|17109583|17109602|17109638|17109799|17109531	chr11	17109795	17110088	AluSq2	-
adrenal_gland_male_adult_54_years	chr11	18552216	18552259	-	18552258	5	6	11	0.418394	2.84535	18552098|18552051|18551376|18552046|18552099|18552060|18552049|18552070	chr11	18552097	18552269	AluJo	-
adrenal_gland_male_adult_54_years	chr11	18552419	18552438	-	18552436	5	9	12	0.45643	2.75163	18552050|18552058|18552066|18552081|18552065|18552077|18552206|18552223	chr11	18552273	18552571	AluY	-
adrenal_gland_male_adult_54_years	chr1	12267763	12267856	+	12267782	9	11	41	1.55947	3.56526	12267981|12268027|12268173|12267980|12268015|12268162|12268131|12268183|12268182|12268151|12268187|12268189|12268188|12268172|12268050|12268035|12268140	chr1	12267684	12267981	AluSx1	+
adrenal_gland_male_adult_54_years	chr11	47235985	47236030	+	47236000	4	4	23	0.874824	3.969	47236700|47236658|47236691|47236710|47254412|47236703|47236734|47236173|47236699|47236451|47236713|47236698|47236651|47236697|47236735|47236701|47236346	chr11	47236061	47236338	AluJo	+
adrenal_gland_male_adult_54_years	chr1	150704584	150704599	-	150704586	6	7	11	0.418394	3.09579	150704252|150704254|150704040|150704258|150704336|150704413|150704253|150704339|150704341	chr1	150704393	150704685	AluJo	-
adrenal_gland_male_adult_54_years	chr1	16111971	16111993	+	16111992	3	3	7	0.266251	2.80735	16112169|16112195|16112197|16112199|16112762|16112198|16112710	chr1	16111847	16112140	AluSz6	+
adrenal_gland_male_adult_54_years	chr11	61567831	61567856	-	61567831	11	11	15	0.570537	3.77356	61567558|61567517|61567349|61567187|61567487|61567508|61567670|61567583|61567470|61567215|61567209|61567581|61567189|61567483	chr11	61567659	61567831	AluJb	-
adrenal_gland_male_adult_54_years	chr11	65206919	65206974	+	65206973	4	4	17	0.646609	3.49923	65207169|65207073|65207446|65207179|65207181|65207527|65207513|65207429|65207209|65207180|65207528|65207511	chr11	65206871	65207155	AluSz6	+
adrenal_gland_male_adult_54_years	chr11	65207385	65207416	+	65207396	3	4	9	0.342322	3.16993	65207721|65207944|65208072|65207597|65208040|65207942|65207530|65207735|65207552	chr11	65207449	65207569	AluJr	+
adrenal_gland_male_adult_54_years	chr11	65207637	65207883	+	65207741	19	19	153	5.81948	5.45477	65208057|65208041|65208055|65207988|65208039|65208054|65208048|65207959|65208051|65207993|65207947|65208082|65208068|65208056|65207969|65208732|65208038|65208647|65208040|65208381|65207979|65207980|65208053|65207991|65208049|65208074|65208045|65208047|65208050|65208564|65208213|65208169|65208138|65208036|65208549|65208072|65208259|65207957|65208379|65207963|65208075|65208043|65208380|65207946|652…	chr11	65207794	65207955	AluJr	+
adrenal_gland_male_adult_54_years	chr11	65208044	65208223	+	65208173	9	9	78	2.96679	4.65463	65208551|65208392|65208820|65208564|65208403|65208414|65208546|65208558|65208411|65208402|65208560|65208400|65208381|65208642|65208412|65208646|65208565|65208409|65208260|65208516|65208408|65208394|65208837|65208540|65208544|65208171|65208426|65209242|65208563|65208549|65208380|65208550|65208562	chr11	65208071	65208335	AluSx3	+
adrenal_gland_male_adult_54_years	chr11	65245139	65245188	+	65245139	4	4	19	0.722681	3.93214	65245297|65245287|65245292|65245375|65245284|65245308|65245306|65245296|65245289|65245277|65245291|65245279|65245315|65245278|65245317|65245295	chr11	65245217	65245277	AluSz6	+
adrenal_gland_male_adult_54_years	chr11	77882841	77882914	-	77882859	3	3	12	0.45643	2.75163	77882518|77882642|77882567|77882563|77882565|77882423|77882520|77882651	chr11	77882681	77882950	AluSx1	-
adrenal_gland_male_adult_54_years	chr1	179326740	179326755	+	179326747	18	18	29	1.10304	3.47867	179327157|179326947|179327415|179327120|179327090|179327156|179327121|179326989|179327114|179327116|179326940|179327185|179327113|179327123|179327081	chr1	179326747	179326983	AluJo	+
adrenal_gland_male_adult_54_years	chr1	203457501	203457522	+	203457506	5	11	22	0.836788	3.65376	203458165|203457681|203457758|203457675|203458407|203457683|203457904|203457814|203457676|203457706|203457809|203457700|203457670|203458010	chr1	203457361	203457666	AluSx	+
adrenal_gland_male_adult_54_years	chr1	205737856	205737882	-	205737863	5	7	12	0.45643	3.25163	205737404|205737406|205737647|205737381|205737667|205737245|205737302|205737403|205737666|205737668	chr1	205737653	205737961	AluSq2	-
adrenal_gland_male_adult_54_years	chr12	101623894	101623895	+	101623894	397	406	414	15.7468	5.11422	101624099|101624022|101624169|101624161|101624123|101624000|101624045|101624186|101624155|101624079|101624078|101624071|101624149|101624148|101624059|101624031|101624196|101624037|101624006|101624095|101624069|101624097|101624180|101624162|101624146|101624158|101624151|101624187|101624179|101624191|101624168|101624150|101624102|101624083|101624072|101624003|101624101|101624152|101624189|101624058…	chr12	101623895	101624187	AluSz	+
adrenal_gland_male_adult_54_years	chr12	110289553	110289581	-	110289575	6	7	10	0.380358	2.92193	110289269|110289329|110289327|110289266|110289255|110288863|110289265|110289267	chr12	110289399	110289655	AluSq	-
adrenal_gland_male_adult_54_years	chr12	117507341	117507342	-	117507341	16	16	17	0.646609	3.28064	117507126|117507167|117507133|117507138|117507156|117507143|117507155|117507142|117507140|117507135|117507137	chr12	117507054	117507342	AluSz	-
adrenal_gland_male_adult_54_years	chr12	15034211	15034241	-	15034235	3	3	10	0.380358	2.72548	15033751|15034036|15033209|15033931|15033833|15033934|15034101	chr12	15034126	15034235	AluJb	-
adrenal_gland_male_adult_54_years	chr1	21545360	21545384	-	21545383	14	14	18	0.684645	4.08746	21544903|21545043|21545032|21545039|21544965|21545063|21544883|21544937|21544920|21545204|21545034|21544899|21545033|21545030|21544900|21544656|21545205	chr1	21545078	21545383	AluSx1	-
adrenal_gland_male_adult_54_years	chr1	228291136	228291184	+	228291171	10	10	26	0.988931	4.00813	228291801|228291622|228291655|228291640|228291589|228291795|228291907|228291798|228291653|228291591|228291799|228291659|228291713|228291800|228291602|228291666|228291657|228291711	chr1	228291219	228291508	AluSz	+
adrenal_gland_male_adult_54_years	chr1	231701072	231701203	+	231701099	8	10	49	1.86376	3.64354	231701364|231701491|231701589|231701596|231701382|231701595|231701585|231701583|231701478|231701361|231701594|231701584|231701473|231701590|231701655|231701591|231701593	chr1	231701189	231701495	AluSg	+
adrenal_gland_male_adult_54_years	chr12	32897359	32897371	+	32897359	14	15	19	0.722681	3.53689	32897689|32897666|32897839|32897701|32897766|32898012|32897662|32898013|32897669|32897663|32897923|32897664|32897659	chr12	32897365	32897664	AluSp	+
adrenal_gland_male_adult_54_years	chr1	24297185	24297202	-	24297201	7	7	9	0.342322	2.75	24296854|24296846|24296773|24296957|24296407|24296947|24296954	chr1	24296853	24297148	AluSg	-
adrenal_gland_male_adult_54_years	chr12	60177971	60177988	+	60177981	5	6	10	0.380358	2.9477	60178321|60178877|60178317|60178319|60178272|60178231|60178323|60178320	chr12	60177987	60178171	AluJr	+
adrenal_gland_male_adult_54_years	chr12	7247777	7248119	-	7247875	22	22	202	7.68324	5.01649	7247561|7247749|7247515|7247513|7247448|7247649|7247563|7247514|7247517|7247521|7247516|7247444|7247406|7247735|7247449|7247742|7247687|7247657|7247692|7247732|7247652|7247368|7247635|7247653|7247738|7247641|7247734|7247655|7247754|7247648|7247752|7247637|7247447|7247737|7247748|7247519|7247564|7247512|7247651|7247654|7247506|7247650|7247733|7247518|7247612|7247698|7247736|7247746|7247647|7247656…	chr12	7247714	7248009	AluSc	-
adrenal_gland_male_adult_54_years	chr12	81649301	81649332	+	81649303	13	27	32	1.21715	3.92611	81649944|81649464|81649467|81649757|81649945|81649471|81649750|81649756|81649954|81649753|81649469|81649496|81649754|81649953|81649755|81649443|81649461|81649472	chr12	81649329	81649598	AluSz	+
adrenal_gland_male_adult_54_years	chr13	21752378	21752392	+	21752391	4	4	6	0.228215	2.58496	21752540|21753009|21752573|21752602|21752575|21752544	chr13	21752293	21752560	AluSz	+
adrenal_gland_male_adult_54_years	chr14	23399941	23399942	+	23399941	9	9	9	0.342322	2.72548	23400214|23400212|23400207|23400213|23400148|23400222|23400137	chr14	23399941	23400208	AluSq	+
adrenal_gland_male_adult_54_years	chr14	24593831	24593832	+	24593831	19	19	20	0.760716	3.51109	24594107|24594117|24593964|24594304|24594271|24594287|24594105|24594181|24594113|24594104|24593968|24594011|24594106	chr14	24593833	24593968	AluJb	+
adrenal_gland_male_adult_54_years	chr14	51101269	51101273	-	51101269	7	7	9	0.342322	2.5	51100708|51100783|51100685|51100290|51100997|51100813	chr14	51101056	51101367	AluJb	-
adrenal_gland_male_adult_54_years	chr14	64063234	64063235	-	64063234	21	21	22	0.836788	3.52257	64062816|64062864|64062859|64062732|64062734|64062934|64062866|64062871|64062862|64062867|64062869|64062848|64062868	chr14	64062937	64063231	AluSq2	-
adrenal_gland_male_adult_54_years	chr14	65400755	65400792	+	65400788	3	3	12	0.45643	3.4183	65401185|65401143|65401189|65401179|65401139|65401177|65401084|65401140|65401186|65401078|65401142	chr14	65400779	65401095	AluSx	+
adrenal_gland_male_adult_54_years	chr14	67852036	67852076	+	67852067	2	2	9	0.342322	2.9477	67852337|67852485|67852338|67852336|67852334|67852226|67852481|67852330	chr14	67852027	67852180	AluJr4	+
adrenal_gland_male_adult_54_years	chr14	68144516	68144658	-	68144572	17	17	73	2.77662	4.99223	68144287|68144293|68144298|68144335|68144311|68144291|68144363|68144304|68144121|68144290|68144308|68144288|68144292|68144370|68144299|68144320|68144358|68144120|68144026|68144283|68144340|68144119|68144431|68144317|68144300|68144278|68144295|68144286|68144294|68144168|68144167|68144117|68144309|68144332|68144310|68144169|68144324|68144297|68144301	chr14	68144496	68144578	AluSq10	-
adrenal_gland_male_adult_54_years	chr14	77974394	77974448	-	77974418	5	6	15	0.570537	2.98523	77974226|77974258|77974084|77974199|77974006|77974205|77974201|77974119|77974202	chr14	77974239	77974360	FLAM_A	-
adrenal_gland_male_adult_54_years	chr14	77974518	77974546	-	77974518	2	3	7	0.266251	2.80735	77974259|77974260|77974295|77974231|77974369|77974203|77974204	chr14	77974369	77974572	AluJb	-
adrenal_gland_male_adult_54_years	chr1	48662020	48662021	-	48662020	327	338	338	12.8561	3.84639	48661863|48661878|48661869|48661872|48661877|48661870|48661876|48661879|48661871|48661881|48661880|48661868|48661873|48661867|48661866|48661882|48661874|48661875	chr1	48661883	48662019	FLAM_C	-
adrenal_gland_male_adult_54_years	chr15	40711002	40711107	+	40711067	6	6	35	1.33125	2.50071	40711354|40711360|40711202|40711356|40711511|40711355|40711651|40711347|40711353|40711507|40711532	chr15	40711050	40711356	AluSq2	+
adrenal_gland_male_adult_54_years	chr15	42707519	42707558	-	42707519	5	10	17	0.646609	3.5	42707208|42707225|42707273|42706985|42707197|42707118|42707275|42707195|42707206|42706838|42707187|42707194	chr15	42707320	42707619	AluSq2	-
adrenal_gland_male_adult_54_years	chr15	45899619	45899656	+	45899620	11	12	17	0.646609	3.38158	45900039|45899891|45899906|45899863|45900040|45900246|45900038|45899992|45900228|45900037|45900074|45899993	chr15	45899690	45899989	AluSc	+
adrenal_gland_male_adult_54_years	chr15	55495908	55495940	-	55495924	3	5	15	0.570537	3.37356	55495405|55495734|55495529|55495729|55495724|55495736|55495701|55495360|55495349|55495730|55495362	chr15	55495610	55495919	AluY	-
adrenal_gland_male_adult_54_years	chr15	65869375	65869598	+	65869481	44	46	201	7.6452	5.19594	65869772|65869778|65869766|65869800|65869816|65869806|65869808|65869538|65869793|65869792|65869770|65869697|65869791|65869797|65869774|65869769|65869773|65869767|65869786|65869905|65869785|65869802|65869751|65869777|65870527|65869775|65869789|65869807|65869815|65869779|65869780|65869799|65869840|65870432|65869832|65870045|65869768|65869760|65869804|65869803|65869805|65869838|65869810|65869757|658…	chr15	65869491	65869764	AluJr	+
adrenal_gland_male_adult_54_years	chr15	89744022	89744042	+	89744025	10	11	19	0.722681	3.72548	89744342|89744207|89744204|89744205|89744340|89744576|89744330|89744323|89744226|89744412|89744193|89744341|89744137|89744345	chr15	89744031	89744326	AluSq	+
adrenal_gland_male_adult_54_years	chr16	14743891	14743922	+	14743896	6	6	20	0.760716	3.48418	14744360|14744358|14744354|14744308|14744355|14744359|14744362|14744087|14744353|14744350|14744352|14744349|14744365	chr16	14743897	14744191	AluSz	+
adrenal_gland_male_adult_54_years	chr16	15797645	15797665	-	15797645	4	4	14	0.532502	3.23593	15797448|15797385|15797166|15797454|15797456|15797457|15797386|15797453|15797219|15797452	chr16	15797466	15797660	AluJo	-
adrenal_gland_male_adult_54_years	chr16	19513895	19513970	-	19513942	10	14	35	1.33125	3.58882	19513490|19513751|19513488|19513428|19513489|19513433|19513434|19513432|19513430|19513487|19513435|19513436|19513437|19513486|19513472	chr16	19513696	19513980	AluJr	-
adrenal_gland_male_adult_54_years	chr16	29708909	29709164	+	29708985	13	14	122	4.64037	4.74696	29709306|29709201|29709303|29709200|29709335|29709175|29709308|29709312|29709318|29709314|29709317|29709330|29709202|29709313|29709319|29709451|29709304|29709364|29709320|29709433|29709322|29709236|29709311|29709309|29709315|29709324|29709329|29709199|29709197|29709323|29709326|29709063|29709310|29709321|29709328|29709316|29709235	chr16	29709025	29709334	AluSz	+
adrenal_gland_male_adult_54_years	chr16	48386245	48386264	+	48386245	12	12	14	0.532502	2.71929	48386686|48386561|48386596|48386577|48386680|48386562|48386593|48386368	chr16	48386274	48386553	AluSz6	+
adrenal_gland_male_adult_54_years	chr16	48387200	48387233	+	48387200	3	3	9	0.342322	2.72548	48387672|48387670|48387527|48387668|48387667|48387647|48387660	chr16	48387134	48387428	AluJb	+
adrenal_gland_male_adult_54_years	chr16	66978074	66978103	+	66978093	6	6	16	0.608573	3.50689	66978354|66978366|66978385|66978462|66978318|66978171|66978227|66978367|66978177|66978322|66978370|66978316	chr16	66978092	66978226	FLAM_A	+
adrenal_gland_male_adult_54_years	chr16	67845025	67845026	-	67845025	95	96	96	3.65144	2.98013	67844881|67844883|67844878|67844884|67844876|67844877|67844885|67844882|67844880|67844879	chr16	67844890	67845026	FLAM_C	-
adrenal_gland_male_adult_54_years	chr16	69496856	69496876	+	69496869	1	1	8	0.304287	2.75	69497168|69497520|69496970|69497531|69496969|69497124|69496965	chr16	69496864	69496990	AluJr	+
adrenal_gland_male_adult_54_years	chr17	1368405	1368415	-	1368405	4	4	8	0.304287	3	1368268|1367509|1368140|1367950|1368003|1368228|1367990|1367544	chr17	1368106	1368405	AluSx	-
adrenal_gland_male_adult_54_years	chr17	19579594	19579638	+	19579618	46	46	55	2.09197	4.99437	19579942|19580278|19579826|19579957|19579822|19579861|19579941|19579846|19579857|19579823|19579955|19580019|19580020|19580224|19579869|19580023|19580119|19579947|19579951|19580117|19579825|19579946|19580024|19580218|19579953|19579819|19580124|19579940|19580219|19579919|19580222|19580311|19579922|19580022|19579818|19580216	chr17	19579684	19579981	AluJb	+
adrenal_gland_male_adult_54_years	chr17	29285720	29285724	+	29285723	5	5	7	0.266251	2.58496	29285873|29286296|29285892|29285879|29285876|29286167	chr17	29285629	29285919	AluJb	+
adrenal_gland_male_adult_54_years	chr17	30908763	30908784	-	30908783	3	3	8	0.304287	2.5	30908551|30908554|30908592|30908569|30908570|30908598	chr17	30908597	30908759	AluJb	-
adrenal_gland_male_adult_54_years	chr17	40176568	40176607	+	40176576	2	2	8	0.304287	2.75	40176813|40176806|40176922|40176807|40176861|40176805|40176811	chr17	40176508	40176809	AluSz	+
adrenal_gland_male_adult_54_years	chr17	40467168	40467173	-	40467172	11	11	13	0.494466	2.61749	40467073|40466719|40466604|40466381|40466914|40466818|40466510|40466514	chr17	40466865	40467172	AluSc8	-
adrenal_gland_male_adult_54_years	chr17	40555282	40555360	-	40555340	4	4	27	1.02697	4.38452	40555114|40554790|40554869|40555056|40554912|40554933|40554832|40554814|40554993|40555127|40555116|40555061|40555120|40554937|40554816|40555025|40555028|40554715|40555052|40555029|40554732|40555124	chr17	40555091	40555246	AluJr	-
adrenal_gland_male_adult_54_years	chr17	40555938	40555995	-	40555957	5	5	26	0.988931	4.28679	40555648|40555383|40555650|40555719|40555564|40555487|40555656|40555844|40555386|40555663|40555722|40555534|40555521|40555647|40555336|40555596|40555646|40555649|40555505|40555645|40555654	chr17	40555639	40555958	AluSx	-
adrenal_gland_male_adult_54_years	chr17	61669546	61669579	+	61669578	6	6	10	0.380358	2.72193	61669934|61670099|61669892|61669843|61669920|61669907|61669823	chr17	61669486	61669789	AluY	+
adrenal_gland_male_adult_54_years	chr17	73315679	73315684	-	73315679	6	6	9	0.342322	2.75	73315371|73315368|73315209|73315261|73315001|73315529|73315362	chr17	73315528	73315820	AluSx3	-
adrenal_gland_male_adult_54_years	chr17	7484854	7484971	+	7484918	11	11	80	3.04287	4.45363	7485266|7485331|7485277|7485096|7485334|7485328|7485398|7485125|7485318|7485283|7485274|7485329|7485279|7485333|7485273|7485284|7485335|7485326|7485330|7485280|7485325|7485332|7485270|7485276|7485397|7485155|7485327|7485278|7485005|7485281|7485148	chr17	7484958	7485270	AluSz	+
adrenal_gland_male_adult_54_years	chr17	80401004	80401045	-	80401044	2	2	9	0.342322	2.72548	80400846|80400648|80400785|80400533|80400839|80400830|80400814	chr17	80400961	80401085	AluJr	-
adrenal_gland_male_adult_54_years	chr1	79107973	79108048	+	79108018	11	11	32	1.21715	3.25705	79108320|79108284|79108280|79108328|79108322|79108273|79108294|79108319|79108283|79108270|79108315|79108321	chr1	79108028	79108283	AluJb	+
adrenal_gland_male_adult_54_years	chr18	21062248	21062307	+	21062290	4	5	13	0.494466	2.56545	21062567|21062566|21062489|21062569|21062560|21062925|21062563	chr18	21062191	21062492	AluSz	+
adrenal_gland_male_adult_54_years	chr18	32888263	32888291	+	32888276	2	3	7	0.266251	2.52164	32888738|32888894|32888610|32888584|32888736|32888737	chr18	32888182	32888406	AluSx3	+
adrenal_gland_male_adult_54_years	chr1	8460544	8460560	-	8460557	4	4	9	0.342322	2.5	8460284|8460297|8460295|8460282|8460299|8460293	chr1	8460333	8460611	AluJr	-
adrenal_gland_male_adult_54_years	chr18	46569698	46569714	-	46569700	11	12	16	0.608573	2.68925	46569324|46569325|46569328|46569367|46569323|46569477|46569438	chr18	46569487	46569799	AluJo	-
adrenal_gland_male_adult_54_years	chr18	61057353	61057354	-	61057353	14	14	14	0.532502	2.98523	61057227|61057091|61056965|61057093|61056950|61057100|61056972|61057092|61056851	chr18	61057276	61057344	AluSz6	-
adrenal_gland_male_adult_54_years	chr18	64289290	64289291	+	64289290	68	69	69	2.62447	2.71733	64289478|64289473|64289467|64289475|64289448|64289465|64289471|64289474|64289477|64289472|64289470|64289476	chr18	64289291	64289427	FLAM_C	+
adrenal_gland_male_adult_54_years	chr19	18280859	18280884	+	18280870	4	4	10	0.380358	2.64644	18281077|18281125|18281045|18281248|18281050|18281258|18281075	chr19	18280736	18281039	AluSz6	+
adrenal_gland_male_adult_54_years	chr19	21366968	21366970	+	21366969	4	7	7	0.266251	2.80735	21367473|21367215|21367212|21367559|21367291|21367553|21367295	chr19	21366870	21367159	AluSc	+
adrenal_gland_male_adult_54_years	chr1	92975160	92975242	-	92975231	6	7	18	0.684645	2.52262	92974572|92975007|92975008|92975009|92975012|92974862|92974863|92975010	chr1	92975050	92975217	FAM	-
adrenal_gland_male_adult_54_years	chr19	39889942	39889991	+	39889956	7	7	24	0.91286	3.80351	39890341|39890474|39890212|39890277|39890279|39890326|39890275|39890822|39890375|39890324|39890278|39890334|39890342|39890331|39890332|39890215	chr19	39889892	39890188	AluSx3	+
adrenal_gland_male_adult_54_years	chr1	94352701	94352715	-	94352714	3	3	7	0.266251	2.58496	94352417|94352418|94352360|94352350|94352351|94352186	chr1	94352547	94352844	AluSx1	-
adrenal_gland_male_adult_54_years	chr19	45596086	45596091	-	45596086	6	6	12	0.45643	3.09579	45595472|45595761|45595451|45595466|45595424|45595471|45595429|45595473|45595438	chr19	45595752	45596044	AluJr	-
adrenal_gland_male_adult_54_years	chr19	46970705	46970882	-	46970862	13	17	68	2.58644	4.65681	46970274|46970563|46970334|46970564|46970591|46970326|46970625|46970524|46970587|46970522|46970325|46970327|46970523|46970535|46970582|46970590|46970526|46970525|46970581|46970521|46970331|46970322|46970527|46970565|46970632|46970576|46970321|46970529|46970585|46970323|46970583|46970530|46970528	chr19	46970676	46970959	AluSg	-
adrenal_gland_male_adult_54_years	chr19	48374299	48374414	-	48374354	19	24	70	2.66251	4.95905	48373934|48373870|48374147|48374066|48374194|48373993|48373871|48373921|48374193|48373873|48373925|48374226|48373926|48374049|48374077|48373893|48374192|48374133|48374200|48373894|48373928|48374191|48373930|48373878|48373872|48374109|48373927|48373907|48373869|48373829|48373867|48373868|48374223|48374265|48373971|48374037|48374227|48374196|48374038|48374180|48373931|48374036	chr19	48374108	48374402	AluSc	-
adrenal_gland_male_adult_54_years	chr19	48374525	48374577	-	48374551	16	21	39	1.4834	4.429	48374213|48374224|48374402|48374222|48374401|48374227|48374373|48374040|48374406|48374296|48374376|48373929|48374442|48374226|48374441|48374071|48374225|48374233|48374220|48373908|48374399|48374403|48374228|48374229|48374400	chr19	48374415	48374546	AluYg6	-
adrenal_gland_male_adult_54_years	chr19	4838881	4838927	-	4838881	3	3	15	0.570537	3.00624	4838364|4838365|4838757|4838367|4838366|4838754|4838361|4838368|4838752	chr19	4838584	4838892	AluSq2	-
adrenal_gland_male_adult_54_years	chr19	50320883	50320899	+	50320897	7	8	11	0.418394	2.91398	50321221|50321190|50321225|50321208|50321073|50321284|50321053|50321206	chr19	50320898	50321208	AluSx1	+
adrenal_gland_male_adult_54_years	chr19	50640583	50640588	-	50640583	45	45	49	1.86376	3.86388	50640369|50640399|50640367|50640370|50640364|50640358|50640362|50640396|50640385|50640371|50640368|50640359|50640400|50640401|50640379|50640365|50640363|50640360|50640366	chr19	50640452	50640584	AluYa5	-
adrenal_gland_male_adult_54_years	chr19	53570150	53570186	-	53570185	3	3	7	0.266251	2.58496	53569802|53570030|53569690|53570033|53570037|53569508	chr19	53570035	53570333	AluSp	-
adrenal_gland_male_adult_54_years	chr20	32293915	32293936	-	32293932	12	12	17	0.646609	3.33717	32293713|32293510|32293724|32293732|32293725|32293723|32293712|32293719|32293706|32293722|32293696	chr20	32293719	32294031	AluSx	-
adrenal_gland_male_adult_54_years	chr20	34635208	34635224	-	34635220	7	7	16	0.608573	3.5	34634910|34634825|34635033|34635046|34634996|34634933|34634873|34635050|34635061|34634920|34634930|34634909	chr20	34634932	34635221	AluSc	-
adrenal_gland_male_adult_54_years	chr20	35518908	35519331	-	35519195	23	27	308	11.715	6.1276	35518814|35518868|35518881|35518683|35518847|35518879|35518807|35518812|35518755|35518957|35518980|35518842|35519045|35518870|35518863|35518810|35518851|35518801|35518748|35518867|35518805|35518841|35518816|35518673|35519024|35518836|35518856|35518852|35518878|35518877|35518809|35518857|35518688|35518819|35518756|35518685|35518855|35518828|35519080|35518826|35518686|35518729|35518813|35518662|355…	chr20	35518867	35519179	AluSq2	-
adrenal_gland_male_adult_54_years	chr20	35520203	35520255	-	35520236	3	3	12	0.45643	3.08496	35520068|35519430|35519876|35519925|35519523|35519640|35520021|35519958|35519638	chr20	35520097	35520262	AluSx3	-
adrenal_gland_male_adult_54_years	chr20	47863604	47863639	-	47863605	22	25	45	1.71161	3.76811	47863362|47863338|47863283|47862952|47863365|47863072|47863366|47863368|47863074|47863025|47862961|47863337|47863073|47862959|47862953|47863282|47863036|47863339|47862954	chr20	47863409	47863703	AluSq2	-
adrenal_gland_male_adult_54_years	chr20	54942535	54942807	+	54942547	11	13	150	5.70537	5.09402	54943087|54943064|54942948|54942945|54943417|54942894|54943368|54943061|54943060|54943366|54942701|54942953|54943012|54943344|54942757|54942942|54942696|54942950|54942718|54943234|54943059|54942704|54943063|54943347|54943068|54942845|54943062|54943348|54942703|54942705|54943122|54943373|54942951|54942947|54943078|54943407|54943070|54943067|54942949|54942954|54943145|54943655|54942702|54942973|549…	chr20	54942412	54942704	AluSz	+
adrenal_gland_male_adult_54_years	chr2	102793213	102793410	+	102793389	25	27	145	5.51519	6.12125	102793388|102793638|102793596|102793791|102793530|102793495|102793882|102793524|102793588|102793528|102794001|102793786|102793648|102793549|102794037|102793948|102794005|102793639|102793779|102793640|102793947|102793489|102793479|102793606|102793581|102793493|102793579|102793649|102794016|102793943|102793408|102793529|102793496|102793801|102793949|102793521|102793525|102793442|102793644|102793527…	chr2	102793443	102793731	AluSx	+
adrenal_gland_male_adult_54_years	chr2	131186055	131186139	-	131186082	6	6	38	1.44536	4.39623	131185872|131185622|131185649|131185632|131185609|131185652|131185762|131185630|131185610|131185646|131185659|131185616|131185936|131185638|131185642|131185587|131185938|131185644|131185655|131185627|131185293|131185803|131185619|131185760	chr2	131185946	131186078	AluY	-
adrenal_gland_male_adult_54_years	chr2	131450527	131450569	+	131450561	2	2	12	0.45643	3.45943	131450717|131451086|131451014|131451312|131451017|131451293|131451013|131451008|131451006|131450718|131451019	chr2	131450583	131450715	AluY	+
adrenal_gland_male_adult_54_years	chr21	34822833	34822850	-	34822849	8	9	13	0.494466	3.25163	34822514|34822315|34822594|34822510|34822695|34822751|34822668|34822314|34822512|34822507	chr21	34822511	34822802	AluSx1	-
adrenal_gland_male_adult_54_years	chr2	136664859	136664978	-	136664959	8	11	57	2.16804	4.07403	136664730|136664520|136664519|136664518|136664724|136664653|136664409|136664523|136664658|136664726|136664517|136664652|136664729|136664521|136664657|136664728|136664527|136664725|136664522|136664525	chr2	136664808	136664874	AluJo	-
adrenal_gland_male_adult_54_years	chr21	46189495	46189552	-	46189495	6	6	22	0.836788	4.00489	46189386|46189118|46189030|46189220|46189126|46189218|46189256|46189175|46189414|46189124|46189265|46189116|46189263|46189136|46189123|46189223|46189138	chr21	46189293	46189592	AluY	-
adrenal_gland_male_adult_54_years	chr21	46190532	46190577	-	46190566	10	10	22	0.836788	3.91613	46190343|46190243|46190322|46190236|46190329|46190248|46190132|46190134|46190429|46190127|46190321|46190242|46190318|46189919|46190241|46190240	chr21	46190334	46190631	AluSc8	-
adrenal_gland_male_adult_54_years	chr2	191789401	191789433	+	191789414	2	2	6	0.228215	2.58496	191789966|191789888|191789970|191789964|191789868|191789701	chr2	191789360	191789651	AluSc	+
adrenal_gland_male_adult_54_years	chr2	198339177	198339201	+	198339193	4	4	11	0.418394	3.12193	198339794|198339560|198339308|198339744|198339815|198339506|198339441|198339557|198339556	chr2	198339127	198339427	AluSz6	+
adrenal_gland_male_adult_54_years	chr2	203427873	203427874	+	203427873	8	8	8	0.304287	2.5	203428222|203428214|203428189|203428709|203428113|203428215	chr2	203427874	203428175	AluSg4	+
adrenal_gland_male_adult_54_years	chr2	203429532	203429572	+	203429558	5	8	18	0.684645	3.68354	203429717|203429973|203429920|203429914|203430191|203429915|203429977|203430190|203429913|203430187|203429974|203429881|203429905|203429789	chr2	203429488	203429789	AluSc8	+
adrenal_gland_male_adult_54_years	chr22	17591515	17591535	+	17591515	5	5	11	0.418394	2.84535	17591943|17591823|17591929|17591831|17591840|17591750|17591950|17591773	chr22	17591436	17591740	AluJo	+
adrenal_gland_male_adult_54_years	chr22	24969559	24969569	+	24969559	10	10	12	0.45643	3.08496	24969827|24969918|24969907|24970182|24969867|24970008|24970826|24969914|24969913	chr22	24969560	24969867	AluJo	+
adrenal_gland_male_adult_54_years	chr22	39414671	39414713	+	39414696	8	9	19	0.722681	3.93214	39415015|39414806|39414987|39414969|39414925|39415315|39414809|39414985|39416147|39415053|39415110|39414893|39415115|39414949|39415050|39414807	chr22	39414702	39415004	AluJb	+
adrenal_gland_male_adult_54_years	chr22	42997234	42997235	+	42997234	81	81	81	3.0809	2.5206	42997398|42997395|42997393|42997386|42997400|42997403|42997404|42997397|42997396|42997399	chr22	42997234	42997370	FLAM_C	+
adrenal_gland_male_adult_54_years	chr2	25198587	25198588	+	25198587	6	6	6	0.228215	2.58496	25198884|25198874|25198761|25198758|25198876|25198890	chr2	25198588	25198895	AluSc8	+
adrenal_gland_male_adult_54_years	chr2	26952448	26952520	+	26952519	9	9	19	0.722681	3.93214	26952782|26952668|26952784|26952624|26953115|26953405|26952916|26952725|26952666|26952820|26952730|26952796|26953236|26952657|26952800|26952754	chr2	26952421	26952720	AluJb	+
adrenal_gland_male_adult_54_years	chr2	26954053	26954119	+	26954089	24	25	58	2.20608	4.31403	26954624|26954638|26954614|26954747|26954623|26954616|26954340|26954612|26954620|26954351|26954348|26954336|26954975|26954346|26954365|26954338|26954643|26954636|26954619|26954295|26954618|26954337|26954641|26954622|26954435|26954621|26954350	chr2	26954167	26954475	AluSz6	+
adrenal_gland_male_adult_54_years	chr2	26960429	26960430	+	26960429	11	11	11	0.418394	3.09579	26960757|26960635|26960745|26960759|26960764|26960647|26960760|26960755|26960600	chr2	26960429	26960717	AluSg	+
adrenal_gland_male_adult_54_years	chr2	27185027	27185028	+	27185027	8	8	8	0.304287	2.5	27185340|27185222|27185346|27185304|27185300|27185323	chr2	27185028	27185339	AluY	+
adrenal_gland_male_adult_54_years	chr2	38961187	38961357	+	38961236	59	61	119	4.52626	5.21745	38961485|38961637|38961741|38961636|38961455|38961641|38961743|38961662|38961628|38961745|38961627|38961633|38961736|38961425|38961452|38961429|38961632|38961663|38961664|38961739|38961468|38961742|38961424|38961660|38961500|38961634|38961599|38961626|38961670|38961361|38961447|38961635|38961638|38961426|38961740|38961640|38961456|38961735|38961737|38961659|38961631|38961457|38961738|38961401|389…	chr2	38961258	38961555	AluSc8	+
adrenal_gland_male_adult_54_years	chr2	70506937	70506946	+	70506938	2	4	8	0.304287	2.5	70507379|70507622|70507325|70507621|70507103|70507413	chr2	70506940	70507234	AluSz	+
adrenal_gland_male_adult_54_years	chr2	85834190	85834213	-	85834190	9	9	13	0.494466	3.25163	85833986|85833942|85833629|85834008|85834007|85833506|85833951|85833939|85833730|85833949	chr2	85833893	85834165	AluSc8	-
adrenal_gland_male_adult_54_years	chr2	86731714	86731894	-	86731777	4	4	55	2.09197	4.24102	86731455|86731478|86731458|86731462|86731454|86731481|86731474|86731219|86731377|86731463|86731475|86731483|86731457|86731466|86731468|86731482|86731476|86731480|86731479|86731485|86731459|86731477|86731268|86731389	chr2	86731634	86731769	FLAM_C	-
adrenal_gland_male_adult_54_years	chr2	9629490	9629565	-	9629491	9	10	25	0.950896	3.81366	9628940|9629173|9629240|9629267|9629254|9629324|9629262|9629261|9629265|9629259|9629258|9629264|9629176|9629257|9628985	chr2	9629388	9629510	AluSz6	-
adrenal_gland_male_adult_54_years	chr3	100083541	100083572	-	100083552	3	3	8	0.304287	2.52164	100083421|100083338|100083359|100082849|100083420|100083342	chr3	100083403	100083545	FAM	-
adrenal_gland_male_adult_54_years	chr3	10193457	10193477	+	10193471	3	3	10	0.380358	2.64644	10193607|10193600|10193609|10193603|10193675|10193674|10193715	chr3	10193471	10193766	AluJr	+
adrenal_gland_male_adult_54_years	chr3	120046823	120046853	-	120046848	2	2	10	0.380358	2.92193	120046460|120046440|120046519|120046493|120046603|120046491|120046487|120046520	chr3	120046582	120046888	AluSx	-
adrenal_gland_male_adult_54_years	chr3	146229968	146229994	-	146229979	4	4	8	0.304287	3	146229647|146229493|146229656|146229555|146229652|146229492|146229764|146229553	chr3	146229644	146229939	AluSq2	-
adrenal_gland_male_adult_54_years	chr3	156259338	156259377	-	156259338	3	4	8	0.304287	2.75	156258577|156259008|156258584|156259069|156259149|156258582|156259170	chr3	156259206	156259414	AluSx1	-
adrenal_gland_male_adult_54_years	chr3	172223843	172223960	-	172223860	17	20	69	2.62447	4.78351	172223737|172223638|172223631|172223614|172223385|172223633|172223613|172223383|172223634|172223793|172223384|172223609|172223559|172223643|172223388|172223557|172223627|172223616|172223605|172223552|172223713|172223599|172223641|172223548|172223550|172223612|172223611|172223763|172223639|172223710|172223610|172223563|172223560|172223622|172223637|172223640	chr3	172223515	172223813	AluSc	-
adrenal_gland_male_adult_54_years	chr3	183397923	183397947	+	183397938	2	3	11	0.418394	3.12193	183398351|183398346|183398194|183398533|183398193|183398538|183398457|183398534|183398353	chr3	183397934	183398099	AluJo	+
adrenal_gland_male_adult_54_years	chr3	185009841	185009910	+	185009896	4	4	23	0.874824	3.20336	185010321|185010131|185010324|185010589|185010755|185010195|185010119|185010125|185010322|185010128|185010137	chr3	185009810	185010106	AluSx1	+
adrenal_gland_male_adult_54_years	chr3	190142436	190142439	+	190142438	25	29	29	1.10304	3.74541	190142773|190142762|190142587|190142761|190142582|190142751|190142774|190142586|190142717|190142626|190142585|190142718|190142770|190142622|190142771|190142584	chr3	190142438	190142703	AluSx1	+
adrenal_gland_male_adult_54_years	chr3	195963741	195963757	-	195963741	6	6	8	0.304287	2.52164	195963488|195963539|195963477|195963538|195963544|195963491	chr3	195963539	195963837	AluSx1	-
adrenal_gland_male_adult_54_years	chr3	196080684	196080685	-	196080684	9	9	9	0.342322	3.16993	196080301|196080234|196080336|196080391|196080298|196080328|196080232|196080252|196080511	chr3	196080343	196080657	AluSx	-
adrenal_gland_male_adult_54_years	chr3	52289082	52289123	-	52289118	8	11	26	0.988931	3.79622	52288840|52288898|52288876|52288882|52288870|52288881|52288880|52288886|52288878|52288875|52288873|52288891|52288874|52288889|52288884	chr3	52288956	52289257	AluSp	-
adrenal_gland_male_adult_54_years	chr4	104000038	104000101	-	104000044	3	5	17	0.646609	3.41042	103999837|103999624|103999696|103999705|103999834|103999536|103999627|103999628|103999620|103999316|103999579|103999454	chr4	104000000	104000035	AluJo	-
adrenal_gland_male_adult_54_years	chr4	120218860	120218917	-	120218883	3	3	15	0.570537	3.5899	120218716|120218721|120218722|120218723|120218486|120218701|120218483|120218427|120218691|120218365|120218720|120218694|120218808	chr4	120218609	120218911	AluSz	-
adrenal_gland_male_adult_54_years	chr4	154096472	154096474	-	154096472	6	7	8	0.304287	2.80735	154096128|154096293|154096150|154096330|154096260|154096264|154096301	chr4	154096139	154096471	AluSx	-
adrenal_gland_male_adult_54_years	chr4	159630498	159630541	+	159630499	6	7	13	0.494466	3.39275	159630734|159631113|159630608|159631121|159631111|159630740|159630816|159631093|159630789|159631058|159630741	chr4	159630397	159630699	AluSg	+
adrenal_gland_male_adult_54_years	chr4	17804986	17805033	-	17805023	4	4	13	0.494466	3.02699	17804516|17804586|17804593|17804589|17804588|17804592|17804510|17804590|17804591	chr4	17804653	17804947	AluSx	-
adrenal_gland_male_adult_54_years	chr4	39549704	39549825	-	39549813	10	11	37	1.40733	4.57405	39549478|39549344|39549269|39549495|39549045|39549277|39549342|39549494|39549680|39549347|39549309|39549479|39549239|39549287|39549384|39549389|39549393|39549016|39549288|39549387|39549483|39549485|39549018|39549275|39549396|39549259	chr4	39549525	39549824	AluSp	-
adrenal_gland_male_adult_54_years	chr4	39550100	39550112	-	39550102	11	19	24	0.91286	2.94068	39549945|39549943|39549780|39549931|39549474|39549823|39549932|39549933|39549930|39549934	chr4	39549981	39550111	FLAM_C	-
adrenal_gland_male_adult_54_years	chr4	39552055	39552066	-	39552062	5	10	13	0.494466	3.2389	39551469|39551864|39551834|39551468|39551836|39551681|39551630|39551837|39551467|39551835	chr4	39551898	39552201	AluSx	-
adrenal_gland_male_adult_54_years	chr4	39552662	39552693	-	39552688	7	8	16	0.608573	3.75	39552395|39552401|39552445|39552519|39552298|39552406|39552302|39552412|39552562|39552510|39552408|39552300|39552444|39552410	chr4	39552526	39552829	AluSz	-
adrenal_gland_male_adult_54_years	chr4	83404986	83405291	-	83405106	18	19	233	8.86235	5.65385	83405067|83404676|83404448|83404747|83404862|83404764|83404948|83404677|83404686|83405043|83404993|83404786|83404902|83404861|83404763|83404709|83404776|83404689|83404768|83404864|83404722|83404754|83404865|83405079|83404752|83405137|83404744|83404774|83404990|83404866|83404688|83404898|83404582|83404738|83405063|83404362|83404920|83404748|83404777|83404740|83404697|83404762|83405065|83404766|834…	chr4	83404935	83405243	AluSp	-
adrenal_gland_male_adult_54_years	chr4	95585786	95585837	+	95585786	31	31	44	1.67358	3.93984	95586069|95585891|95586229|95586242|95586112|95586099|95586108|95586147|95585941|95586116|95586148|95586113|95586078|95586105|95586146|95586110|95586079|95586076|95585935|95586145|95586149	chr4	95585738	95586030	AluSx	+
adrenal_gland_male_adult_54_years	chr5	10280182	10280225	-	10280211	2	2	9	0.342322	2.72548	10279977|10279788|10279814|10279569|10279509|10279545|10279775	chr5	10280032	10280350	AluSx	-
adrenal_gland_male_adult_54_years	chr5	133531102	133531103	-	133531102	14	15	15	0.570537	2.80735	133530930|133530751|133530927|133530931|133530928|133530932|133530929|133530925	chr5	133530950	133531238	AluJr	-
adrenal_gland_male_adult_54_years	chr5	150560746	150561224	-	150561112	34	38	356	13.5408	4.35331	150560629|150560845|150560657|150560993|150560625|150560654|150560626|150560624|150560939|150560646|150560776|150560755|150560723|150560753|150560711|150560628|150560632|150560873|150560981|150560871|150560754|150560659|150560759|150560825|150560692|150560622|150560742|150560737|150560667|150560623|150560752|150560917|150560778|150560621|150560658|150560968|150560630|150560660|150560619|150560782…	chr5	150560771	150561076	AluY	-
adrenal_gland_male_adult_54_years	chr5	156570641	156570672	-	156570671	5	6	12	0.45643	3.25163	156570312|156570015|156570541|156570309|156570285|156570308|156570535|156570536|156570311|156570295	chr5	156570394	156570688	AluSz	-
adrenal_gland_male_adult_54_years	chr5	15677245	15677265	+	15677245	5	5	10	0.380358	2.92193	15677580|15677576|15677590|15677600|15677589|15677598|15677591|15677596	chr5	15677296	15677584	AluSz	+
adrenal_gland_male_adult_54_years	chr5	167976975	167976976	-	167976975	7	7	8	0.304287	2.80735	167976746|167976865|167976856|167976180|167976849|167976760|167976612	chr5	167976781	167976949	AluSc8	-
adrenal_gland_male_adult_54_years	chr5	167982516	167982583	-	167982542	6	7	20	0.760716	3.24644	167982176|167982179|167982387|167982060|167982101|167982177|167982175|167982398|167982104|167982025|167982061	chr5	167982256	167982547	AluSx	-
adrenal_gland_male_adult_54_years	chr5	175774492	175774529	-	175774502	4	5	10	0.380358	2.92193	175774240|175774129|175774257|175774183|175774241|175774287|175774281|175774307	chr5	175774194	175774502	AluSx1	-
adrenal_gland_male_adult_54_years	chr5	177043974	177043975	-	177043974	16	17	17	0.646609	2.85846	177043707|177043740|177043738|177043728|177043741|177043706|177043286|177043704	chr5	177043775	177044073	AluJb	-
adrenal_gland_male_adult_54_years	chr5	180258552	180258634	-	180258611	34	34	187	7.1127	5.01536	180258401|180258355|180258212|180258304|180257904|180258224|180258209|180258415|180258140|180258403|180258413|180258220|180258315|180258104|180258149|180258221|180258143|180258341|180258405|180258473|180258141|180258313|180258406|180258412|180258210|180258382|180258411|180258147|180258416|180258219|180258317|180258418|180258350|180258373|180258223|180258388|180258151|180258225|180258316|180258421…	chr5	180258415	180258530	AluSq2	-
adrenal_gland_male_adult_54_years	chr5	35060091	35060097	-	35060091	3	4	7	0.266251	2.52164	35059748|35059755|35059743|35059548|35059907|35059739	chr5	35059943	35060151	AluJb	-
adrenal_gland_male_adult_54_years	chr5	40826074	40826121	-	40826096	2	2	12	0.45643	2.66353	40825793|40825792|40825620|40825647|40825817|40825623|40825732	chr5	40825815	40826110	AluSx	-
adrenal_gland_male_adult_54_years	chr5	42993321	42993378	-	42993327	5	6	19	0.722681	3.78714	42974644|42992916|42992998|42992997|42993177|42993060|42993063|42993026|42993025|42992996|42993000|42993029|42993019|42993030|42992922	chr5	42993009	42993319	AluSx4	-
adrenal_gland_male_adult_54_years	chr5	77655336	77655388	-	77655377	1	1	7	0.266251	2.52164	77655120|77655001|77655118|77655192|77655002|77654999	chr5	77655216	77655512	AluSg	-
adrenal_gland_male_adult_54_years	chr5	79922924	79922983	-	79922936	6	6	17	0.646609	2.93396	79922628|79922641|79922639|79922643|79922626|79922640|79922642|79922638|79922832	chr5	79922755	79922876	FLAM_A	-
adrenal_gland_male_adult_54_years	chr5	95130454	95130511	+	95130476	3	4	22	0.836788	3.04644	95131093|95130631|95130719|95130959|95130964|95130686|95130963|95130630|95131095|95131092|95130627	chr5	95130524	95130822	AluSz	+
adrenal_gland_male_adult_54_years	chr6	111022127	111022128	+	111022127	41	41	41	1.55947	4.68313	111022491|111022319|111022566|111022340|111022658|111022446|111022448|111022522|111022415|111022489|111022352|111022428|111022350|111022563|111022437|111022334|111022381|111022425|111022460|111022285|111022456|111022386|111022341|111022567|111022431|111022461|111022565|111022443|111022344|111022427|111022568	chr6	111022127	111022414	AluSg4	+
adrenal_gland_male_adult_54_years	chr6	122765207	122765868	-	122765332	83	90	851	32.3685	5.70862	122765430|122764580|122765167|122765388|122765182|122765142|122765113|122765490|122765602|122765147|122765585|122765270|122764986|122765118|122765264|122765158|122765275|122765641|122765637|122765434|122765351|122765268|122764980|122765175|122765405|122765272|122765646|122765094|122765265|122765352|122765139|122765688|122765429|122765658|122765141|122764819|122764842|122765176|122765138|122765178…	chr6	122765165	122765430	AluJb	-
adrenal_gland_male_adult_54_years	chr6	126251162	126251195	+	126251178	4	4	11	0.418394	3.02717	126251573|126251423|126251629|126251557|126251422|126251424|126251425|126251328|126251616	chr6	126251223	126251499	AluSx1	+
adrenal_gland_male_adult_54_years	chr6	144148941	144149096	+	144148941	16	20	85	3.23305	5.19214	144149339|144149278|144149332|144149612|144149778|144149136|144149593|144149401|144149456|144149454|144149471|144149724|144149336|144149329|144149472|144149610|144149448|144149333|144149224|144149399|144149275|144149697|144149680|144149457|144149331|144149335|144149334|144149044|144149360|144149361|144149265|144149342|144149330|144149337|144149453|144149271|144149353|144149455|144149400|144149348…	chr6	144148997	144149288	AluSz	+
adrenal_gland_male_adult_54_years	chr6	149395696	149395718	+	149395717	9	9	12	0.45643	2.73216	149396197|149395960|149396018|149395959|149396099|149396098|149395961	chr6	149395735	149395872	FRAM	+
adrenal_gland_male_adult_54_years	chr6	149912142	149912253	+	149912148	31	32	124	4.71644	4.82921	149912574|149912499|149912459|149912501|149912482|149912455|149912555|149912485|149912776|149912457|149912498|149912553|149912454|149912463|149912458|149912509|149912495|149912507|149912556|149912475|149912551|149912502|149912494|149912480|149912487|149912460|149912461|149912503|149912486|149912552|149912489|149912549|149912572|149912452|149912709|149912554|149912573|149912483|149912488|149912500	chr6	149912148	149912439	AluSc	+
adrenal_gland_male_adult_54_years	chr6	26273743	26273748	+	26273743	18	19	20	0.760716	3.53163	26274034|26274008|26273947|26273950|26274011|26273951|26273921|26273893|26274030|26274032|26273949|26274031|26273980|26273938	chr6	26273743	26274032	AluSq2	+
adrenal_gland_male_adult_54_years	chr6	2903050	2903051	-	2903050	181	181	182	6.92252	3.99537	2902767|2902802|2902755|2902713|2902731|2902850|2902747|2902716|2902735|2902741|2902744|2902752|2902712|2902737|2902746|2902868|2902759|2902738|2902715|2902753|2902745|2902742|2902739|2902798|2902754|2902714|2902743|2902772|2902721|2902692|2902750|2902758|2902751|2902847|2902740|2902733	chr6	2902742	2903051	AluSz	-
adrenal_gland_male_adult_54_years	chr6	30460785	30460887	+	30460884	30	31	125	4.75448	5.42264	30461684|30461101|30461185|30461097|30461094|30461335|30461228|30461149|30460966|30461099|30460968|30461473|30461492|30461147|30461139|30461146|30461095|30461150|30461190|30461238|30461309|30461132|30461100|30461129|30461481|30461162|30460965|30461237|30461143|30461334|30461308|30461135|30461096|30461307|30461142|30460984|30461144|30461082|30461182|30461263|30461186|30461089|30460964|30461102|304…	chr6	30460788	30461101	AluSc8	+
adrenal_gland_male_adult_54_years	chr6	30593560	30593594	+	30593593	4	4	20	0.760716	3.58418	30593944|30594053|30594007|30593896|30593951|30593885|30593886|30593904|30593902|30593900|30593888|30593884|30593891	chr6	30593595	30593888	AluJb	+
adrenal_gland_male_adult_54_years	chr6	34251214	34251251	-	34251214	8	8	13	0.494466	3.39275	34251074|34250470|34250468|34250945|34250436|34250465|34251028|34250442|34250795|34250471|34250446	chr6	34250974	34251279	AluSg	-
adrenal_gland_male_adult_54_years	chr6	34254804	34254827	-	34254814	4	5	10	0.380358	2.64644	34254524|34254525|34254513|34254512|34254498|34254514|34254515	chr6	34254566	34254853	AluSq2	-
adrenal_gland_male_adult_54_years	chr6	34842050	34842098	+	34842093	3	4	12	0.45643	3.25163	34842481|34842314|34842345|34842459|34842473|34842471|34842474|34842476|34842475|34842467	chr6	34842023	34842325	AluSc	+
adrenal_gland_male_adult_54_years	chr6	36458179	36458215	+	36458179	3	3	11	0.418394	2.92193	36458382|36458623|36458336|36458728|36458434|36458387|36458384|36458646	chr6	36458029	36458331	AluSx1	+
adrenal_gland_male_adult_54_years	chr6	36893942	36894002	+	36893993	6	10	23	0.874824	4.08878	36894284|36894329|36894333|36894334|36894322|36894332|36894335|36894331|36894324|36894229|36894338|36894372|36894323|36894209|36894337|36894161|36894336|36894139	chr6	36894027	36894336	AluSx1	+
adrenal_gland_male_adult_54_years	chr6	42854567	42854612	+	42854594	3	3	14	0.532502	3.18201	42855091|42854932|42855013|42854930|42854748|42854776|42855007|42854894|42854805|42854891	chr6	42854451	42854749	AluSc	+
adrenal_gland_male_adult_54_years	chr6	42855124	42855139	+	42855136	5	5	10	0.380358	2.52193	42855619|42855363|42855758|42855757|42855369|42855352|42855357	chr6	42855038	42855333	AluSp	+
adrenal_gland_male_adult_54_years	chr7	100411275	100411335	-	100411304	4	4	17	0.646609	3.57247	100410471|100405195|100410516|100410756|100410522|100410533|100410561|100410372|100410517|100403285|100410717|100410579|100410470	chr7	100410928	100411237	AluSx1	-
adrenal_gland_male_adult_54_years	chr7	100738464	100738473	+	100738470	9	10	15	0.570537	3.37878	100738668|100738669|100738724|100738965|100738671|100738635|100738673|100738742|100738661|100738882|100739015	chr7	100738374	100738654	AluJr	+
adrenal_gland_male_adult_54_years	chr7	102066497	102066533	+	102066513	6	6	11	0.418394	3.12193	102067054|102066976|102066694|102066873|102066708|102066743|102067079|102066791|102066789	chr7	102066570	102066693	FLAM_A	+
adrenal_gland_male_adult_54_years	chr7	102089008	102089037	+	102089023	4	4	10	0.380358	2.50326	102089611|102089246|102089278|102089195|102089252|102089634	chr7	102088872	102089179	AluSx1	+
adrenal_gland_male_adult_54_years	chr7	131177259	131177275	+	131177259	5	6	9	0.342322	2.72548	131177718|131177832|131177550|131177543|131177389|131178149|131177923	chr7	131177208	131177515	AluJr	+
adrenal_gland_male_adult_54_years	chr7	143550385	143550405	-	143550391	4	4	8	0.304287	2.52164	143550163|143550176|143550168|143550172|143550189|143550188	chr7	143550168	143550407	AluJr	-
adrenal_gland_male_adult_54_years	chr7	158524273	158524370	-	158524316	24	26	57	2.16804	4.59934	158524126|158523993|158523935|158523827|158523810|158523912|158523955|158523843|158523812|158524091|158523908|158523911|158523914|158523992|158523990|158523994|158523894|158523997|158523996|158523910|158523989|158523830|158523949|158523814|158523995|158523952|158523913|158524191	chr7	158523995	158524297	AluSx	-
adrenal_gland_male_adult_54_years	chr7	26708477	26708515	-	26708477	5	5	8	0.304287	2.75	26708326|26708037|26707929|26708206|26708317|26707902|26708202	chr7	26708281	26708492	AluSx3	-
adrenal_gland_male_adult_54_years	chr7	30053094	30053108	-	30053107	4	4	7	0.266251	2.52164	30052867|30052870|30052871|30052864|30052586|30052548	chr7	30052867	30053163	AluSz	-
adrenal_gland_male_adult_54_years	chr7	35672867	35672924	-	35672877	3	3	13	0.494466	2.79248	35672511|35672678|35672645|35672567|35672651|35672513|35672512|35672577	chr7	35672678	35672978	AluSz	-
adrenal_gland_male_adult_54_years	chr7	6488147	6488177	-	6488176	5	5	21	0.798752	3.84423	6487978|6487717|6487671|6487769|6487776|6487976|6487742|6487715|6487729|6487721|6487966|6487764|6487758|6487667|6487736|6487739	chr7	6487830	6488138	AluSz	-
adrenal_gland_male_adult_54_years	chr7	65422283	65422291	+	65422283	14	15	16	0.608573	3.28064	65422463|65422577|65422500|65422643|65422459|65422501|65422498|65422581|65422461|65422452|65422476	chr7	65422185	65422481	AluSx	+
adrenal_gland_male_adult_54_years	chr7	75163890	75163919	-	75163918	5	5	13	0.494466	3.02699	75163760|75163194|75163759|75163629|75163639|75163183|75163554|75163761|75163753	chr7	75163744	75164054	AluSx1	-
adrenal_gland_male_adult_54_years	chr7	92087292	92087307	+	92087292	5	5	8	0.304287	2.75	92087601|92087614|92087588|92087603|92087959|92087612|92087832	chr7	92087168	92087470	AluSz	+
adrenal_gland_male_adult_54_years	chr7	99634042	99634052	+	99634051	15	16	20	0.760716	3.38418	99634259|99634380|99634385|99634236|99634206|99634192|99634234|99634194|99634397|99634375|99634196|99634415	chr7	99634057	99634364	AluSx1	+
adrenal_gland_male_adult_54_years	chr7	99635335	99635353	+	99635352	21	21	27	1.02697	3.69947	99635492|99636381|99635655|99635653|99635660|99635539|99635657|99635663|99635802|99635654|99635683|99635658|99635534|99635800|99635686	chr7	99635358	99635654	AluSx3	+
adrenal_gland_male_adult_54_years	chr7	99636692	99636729	+	99636709	6	6	12	0.45643	2.9183	99637204|99636937|99636946|99636950|99636959|99636945|99637124|99636967	chr7	99636652	99636958	AluSx1	+
adrenal_gland_male_adult_54_years	chr8	103743340	103743361	-	103743347	5	6	16	0.608573	2.73957	103743143|103743127|103743139|103743113|103743105|103743128|103743115|103743111	chr8	103743187	103743310	AluJb	-
adrenal_gland_male_adult_54_years	chr8	134471238	134471293	-	134471288	4	4	20	0.760716	3.44145	134471106|134471061|134471028|134471129|134471022|134471026|134471027|134470826|134470116|134470828|134470831|134471040|134470925	chr8	134471116	134471437	AluJo	-
adrenal_gland_male_adult_54_years	chr8	144536879	144536883	-	144536879	12	12	14	0.532502	3.52164	144536737|144536699|144536742|144536735|144536731|144536678|144536700|144536759|144536478|144536736|144536739|144536690	chr8	144536572	144536880	AluY	-
adrenal_gland_male_adult_54_years	chr8	27765411	27765442	-	27765441	10	10	25	0.950896	3.31908	27765026|27765251|27765211|27765250|27764665|27765027|27762335|27765128|27765024|27765183|27765214|27765187|27765025	chr8	27765089	27765386	AluSz	-
adrenal_gland_male_adult_54_years	chr8	37613507	37613576	+	37613534	3	3	14	0.532502	2.80735	37614054|37614479|37614050|37614051|37614049|37614048|37613766|37613815	chr8	37613425	37613716	AluSx1	+
adrenal_gland_male_adult_54_years	chr8	37999746	38000046	-	37999931	8	8	109	4.1459	5.48153	37999421|37999555|37999563|37999435|37999798|37999490|37999430|37999418|37999796|37999553|37999554|37999609|37999428|37999540|37999667|37999556|37999737|37999845|37999497|37999498|37999788|37999559|37999545|37999491|37999753|37999557|37999427|37999423|37999419|37999500|37999424|37999740|37999388|37999918|37999921|37999714|37999752|37999728|37999562|37999492|37999496|37999739|37999239|37999426|379…	chr8	37999743	37999875	FLAM_A	-
adrenal_gland_male_adult_54_years	chr8	38000200	38000425	-	38000246	50	59	234	8.90038	5.35215	38000047|38000039|37999923|38000033|38000022|38000043|38000046|38000024|38000038|38000210|38000036|38000019|38000009|38000052|38000026|37999795|38000050|38000034|38000028|38000018|37999750|38000045|38000053|38000041|38000049|38000309|38000025|38000032|38000017|38000023|38000037|38000014|38000011|38000042|38000021|38000241|38000015|38000031|38000030|38000044|37999755|38000020|37999834|38000035|380…	chr8	38000050	38000328	AluSx	-
adrenal_gland_male_adult_54_years	chr8	38001121	38001229	-	38001161	15	15	53	2.0159	4.61651	38000981|38000611|38000990|38000612|38000607|38000938|38000793|38000976|38000988|38000689|38000953|38000603|38000609|38000868|38000738|38000604|38000799|38000605|38000608|38000950|38000606|38000982|38000978|38000948|38000986|38000989|38000866|38000985|38000979|38000614|38000610	chr8	38000823	38001121	AluSc8	-
adrenal_gland_male_adult_54_years	chr8	38828032	38828044	+	38828033	2	3	8	0.304287	2.75	38828340|38828357|38828342|38828338|38828339|38828542|38828343	chr8	38828036	38828333	AluSq2	+
adrenal_gland_male_adult_54_years	chr8	99057869	99057904	+	99057903	2	2	8	0.304287	3	99058705|99058336|99058192|99058221|99058244|99058068|99058668|99058904	chr8	99057920	99058242	AluJb	+
adrenal_gland_male_adult_54_years	chr9	102733986	102734003	+	102733995	43	43	49	1.86376	4.11663	102734474|102734479|102734480|102734483|102734325|102734475|102734232|102734236|102734204|102734476|102734485|102734477|102734482|102734202|102734235|102734481|102734487|102734478|102734206|102734229|102734439|102734161	chr9	102734020	102734286	AluJr	+
adrenal_gland_male_adult_54_years	chr9	111781270	111781357	-	111781302	9	9	37	1.40733	4.52	111780931|111780935|111781017|111780922|111781015|111780829|111781035|111780849|111780854|111781013|111781014|111780855|111781139|111780606|111780762|111781019|111780856|111780932|111780936|111780930|111780933|111781143|111781054|111780704|111780860|111781047	chr9	111781019	111781329	AluJb	-
adrenal_gland_male_adult_54_years	chr9	116025252	116025256	+	116025255	11	11	13	0.494466	3.08496	116025799|116025585|116025584|116025451|116025364|116025456|116025455|116025452|116025449	chr9	116025158	116025451	AluJo	+
adrenal_gland_male_adult_54_years	chr9	123579876	123579883	-	123579882	4	6	10	0.380358	2.72548	123579203|123579540|123579541|123579524|123579539|123579680|123579543	chr9	123579542	123579848	AluSz6	-
adrenal_gland_male_adult_54_years	chr9	131018988	131019031	-	131018990	19	23	33	1.25518	3.80423	131018316|131018682|131018212|131018679|131018675|131018742|131018399|131018743|131018782|131018683|131018744|131018480|131018676|131018778|131018779|131018681|131018670	chr9	131018782	131019072	AluSx	-
adrenal_gland_male_adult_54_years	chr9	132590116	132590292	-	132590233	8	8	58	2.20608	3.81501	132589831|132589908|132590044|132589835|132589893|132589836|132589916|132590024|132589848|132589910|132590002|132589999|132589907|132590019|132589834|132590023|132589909|132589819|132590022|132590003	chr9	132590056	132590371	AluSp	-
adrenal_gland_male_adult_54_years	chr9	19372637	19372656	+	19372637	5	5	7	0.266251	2.52164	19373472|19373001|19373337|19373454|19372914|19373087	chr9	19372585	19372878	AluSz	+
adrenal_gland_male_adult_54_years	chr9	91619075	91619148	+	91619129	9	9	28	1.065	4.38452	91619360|91619521|91619735|91619205|91619553|91619547|91619487|91619545|91619356|91619358|91619357|91619352|91619496|91619333|91619554|91619546|91619409|91619633|91619334|91619486|91619503|91619551	chr9	91619031	91619340	AluSx	+
adrenal_gland_male_adult_54_years	chrX	117926320	117926337	+	117926320	24	24	29	1.10304	4.07333	117926498|117926610|117926997|117926467|117926509|117926746|117926907|117926758|117926998|117926503|117926530|117926471|117926508|117926500|117926501|117926499|117926715|117926698|117926697	chrX	117926326	117926638	AluSz	+
adrenal_gland_male_adult_54_years	chrX	153276741	153276796	-	153276766	3	3	10	0.380358	3.12193	153276221|153276642|153276067|153276542|153276201|153276326|153276452|153276551|153276569	chrX	153276542	153276840	AluJb	-
adrenal_gland_male_adult_54_years	chrX	16779139	16779165	+	16779152	5	6	12	0.45643	2.61749	16779526|16779487|16779492|16779424|16779484|16779380|16779379|16779411	chrX	16779066	16779353	AluSx1	+
adrenal_gland_male_adult_54_years	chrX	16779675	16779683	+	16779682	15	15	18	0.684645	3.85217	16779875|16779878|16779879|16779874|16779838|16779977|16779828|16779811|16779877|16780224|16779830|16779831|16779840|16779807|16779976	chrX	16779689	16779800	AluSx	+
adrenal_gland_male_adult_54_years	chrX	48436218	48436395	+	48436284	67	68	147	5.59127	4.59805	48436547|48436566|48436502|48436474|48436525|48436662|48436549|48436504|48436498|48436627|48436621|48436588|48436660|48436473|48436628|48436503|48436499|48436661|48436501|48436614|48436529|48436616|48436643|48436492|48436545|48436647|48436590|48436619|48436623|48436625|48436622|48436587|48436500|48436524|48436591|48436542|48436615|48436665|48436489|48436523|48436629|48436646|48436543|48436505|484…	chrX	48436270	48436480	AluSx	+
adrenal_gland_male_adult_54_years	chrX	49047285	49047340	-	49047321	2	2	10	0.380358	2.50326	49046987|49046973|49046980|49046978|49046976|49047166	chrX	49046935	49047271	AluJb	-
airway_epithelial_cell	chr10	101555173	101555174	+	101555173	17	17	17	0.708959	3.69012	101555460|101555476|101555372|101555456|101555461|101555504|101555378|101555493|101555494|101555478|101555373|101555474|101555473|101555472	chr10	101555174	101555454	AluSq2	+
airway_epithelial_cell	chr10	101579861	101579863	+	101579862	49	63	66	2.75243	4.64016	101580141|101580147|101580150|101580183|101580157|101580153|101580149|101580062|101580188|101580201|101580148|101580156|101580170|101580159|101580146|101580278|101580152|101580185|101580181|101580187|101580161|101580189|101580082|101580050|101580165|101580155|101580073|101580067|101580191|101580200|101580144|101580190	chr10	101579866	101580147	AluSx	+
airway_epithelial_cell	chr10	103929447	103929453	+	103929450	25	25	65	2.71073	3.9282	103929739|103929800|103929759|103929639|103929798|103929790|103929793|103929608|103929614|103929671|103929794|103929624|103929802|103929799|103929796|103929801|103929797|103929750|103929672|103929704|103929795	chr10	103929452	103929749	AluY	+
airway_epithelial_cell	chr10	112068608	112068612	-	112068608	17	18	19	0.792366	3.50326	112068264|112068285|112068287|112068284|112068302|112068299|112068291|112068313|112068292|112068289|112068311|112068309|112068298	chr10	112068284	112068609	AluSx1	-
airway_epithelial_cell	chr10	22535527	22535530	-	22535527	11	11	13	0.542145	3.02699	22535353|22535389|22535352|22535273|22535275|22535276|22535347|22535278|22535348	chr10	22535232	22535527	AluSq2	-
airway_epithelial_cell	chr10	32418868	32418869	+	32418868	33	33	33	1.37621	4.18789	32419138|32419131|32419136|32419139|32419144|32419145|32419143|32419116|32419135|32419121|32419137|32419118|32419133|32419112|32419153|32419165|32419140|32419123|32419119|32419142|32419117	chr10	32418869	32419123	AluSx	+
airway_epithelial_cell	chr10	43667097	43667098	-	43667097	16	16	17	0.708959	3.57782	43666924|43666804|43666994|43666832|43666923|43666922|43667004|43666783|43666850|43666795|43666917|43666926|43666842	chr10	43666800	43667098	AluSx	-
airway_epithelial_cell	chr10	69524846	69524853	+	69524852	8	8	11	0.458738	2.91398	69525027|69525109|69524990|69525028|69525026|69525106|69524985|69525014	chr10	69524852	69525156	AluY	+
airway_epithelial_cell	chr11	103370645	103370654	+	103370645	7	7	9	0.375331	2.9477	103370940|103371036|103370966|103370905|103371103|103370962|103371079|103370958	chr11	103370636	103370918	AluJb	+
airway_epithelial_cell	chr11	118890449	118890450	-	118890449	17	17	17	0.708959	2.89542	118890344|118890153|118890152|118890137|118890140|118890148|118890155|118890157	chr11	118890187	118890450	AluSx	-
airway_epithelial_cell	chr1	115248328	115248405	-	115248337	2	3	17	0.708959	3.15564	115248088|115248089|115247956|115247394|115248090|115247855|115247857|115248091|115248087|115247953	chr1	115248250	115248409	AluSx3	-
airway_epithelial_cell	chr11	18552472	18552521	-	18552486	2	2	7	0.291924	2.80735	18552076|18552065|18552096|18552054|18552061|18552051|18552053	chr11	18552273	18552571	AluY	-
airway_epithelial_cell	chr11	27180436	27180441	-	27180436	7	7	9	0.375331	2.6416	27180117|27180299|27180108|27180190|27180121|27180288|27180314	chr11	27180304	27180437	AluY	-
airway_epithelial_cell	chr11	27328928	27328929	-	27328928	8	8	8	0.333628	2.75	27328637|27328632|27328635|27328663|27328642|27328638|27328671	chr11	27328637	27328929	AluJb	-
airway_epithelial_cell	chr11	47448534	47448535	+	47448534	25	25	25	1.04259	3.47908	47448799|47448763|47448794|47448785|47448797|47448792|47448793|47448790|47448789|47448800|47448798|47448753|47448788	chr11	47448535	47448822	AluY	+
airway_epithelial_cell	chr11	47789204	47789257	+	47789230	4	4	13	0.542145	3.02699	47789548|47789441|47789547|47789621|47789885|47789481|47789611|47789821|47789551	chr11	47789304	47789598	AluSg4	+
airway_epithelial_cell	chr1	155110981	155111029	+	155110995	5	5	18	0.750663	2.54663	155111314|155111320|155111317|155111232|155111316|155111318|155111315	chr1	155111018	155111263	AluSx	+
airway_epithelial_cell	chr1	155278157	155278158	-	155278157	49	49	50	2.08517	4.19331	155277824|155277762|155277813|155277984|155277764|155277629|155277776|155277766|155277781|155277956|155277761|155277770|155277765|155277783|155277963|155277768|155277989|155277760|155277742|155277937|155277771|155277767|155277732|155277838	chr1	155277846	155278157	AluSx3	-
airway_epithelial_cell	chr1	15761356	15761357	-	15761356	24	24	25	1.04259	2.78145	15761003|15760999|15761000|15761163|15761002|15760998|15761004|15760996|15761001|15761005	chr1	15761048	15761357	AluSx1	-
airway_epithelial_cell	chr1	160259617	160259651	-	160259639	5	6	11	0.458738	3.02717	160259147|160259149|160259146|160259327|160259336|160259141|160259145|160259148|160259203	chr1	160259378	160259680	AluSz6	-
airway_epithelial_cell	chr1	161085152	161085153	-	161085152	29	29	31	1.29281	3.94742	161084854|161084968|161084863|161084859|161084950|161084951|161084987|161084985|161084916|161084975|161084858|161084983|161084868|161084862|161084850|161084861|161084865|161084965|161084856|161084963	chr1	161084850	161085153	AluSx1	-
airway_epithelial_cell	chr11	62420904	62420939	+	62420930	2	2	8	0.333628	3	62421239|62421261|62421248|62421259|62421283|62421236|62421249|62421279	chr11	62420971	62421230	AluSx	+
airway_epithelial_cell	chr11	64103133	64103138	+	64103133	8	9	10	0.417035	3.12193	64103545|64103529|64103537|64103298|64103403|64103549|64103302|64103505|64103535	chr11	64103013	64103308	AluSx1	+
airway_epithelial_cell	chr11	65207727	65207833	+	65207803	18	23	79	3.29457	4.96058	65207964|65208056|65208074|65208039|65207946|65208060|65207960|65207940|65208550|65208047|65208051|65208061|65208408|65208043|65208052|65208040|65208048|65207939|65207950|65208059|65208073|65208050|65207992|65208046|65208053|65207980|65207982|65207981|65208049|65207967|65207978|65208054|65207969|65207951|65208411|65207937|65207976|65208170	chr11	65207794	65207955	AluJr	+
airway_epithelial_cell	chr11	68653535	68653536	+	68653535	7	7	7	0.291924	2.52164	68653886|68653862|68653866|68653871|68653861|68653870	chr11	68653536	68653842	AluSz6	+
airway_epithelial_cell	chr11	73664287	73664288	+	73664287	13	13	13	0.542145	2.77736	73664572|73664404|73664573|73664396|73664397|73664408|73664403|73664574	chr11	73664288	73664371	AluY	+
airway_epithelial_cell	chr11	74258087	74258088	+	74258087	17	17	17	0.708959	3.26393	74258415|74258349|74258408|74258406|74258380|74258243|74258266|74258412|74258400|74258403	chr11	74258088	74258415	AluJr	+
airway_epithelial_cell	chr1	203749290	203749291	+	203749290	10	10	10	0.417035	2.84644	203749422|203749455|203749465|203749518|203749423|203749463|203749546|203749457	chr1	203749290	203749589	AluSq2	+
airway_epithelial_cell	chr1	209808960	209808997	-	209808980	3	3	8	0.333628	2.52164	209808681|209808724|209808703|209808312|209808712|209808702	chr1	209808728	209809046	AluSz	-
airway_epithelial_cell	chr12	110289597	110290022	-	110289744	16	18	218	9.09136	6.18314	110289019|110289396|110289023|110288865|110289241|110288756|110289656|110289142|110289262|110288820|110289260|110288825|110289657|110289328|110289557|110289243|110289528|110289324|110288991|110289331|110289080|110289655|110289135|110289330|110289617|110289809|110289775|110288981|110289094|110289746|110288984|110289007|110289035|110288877|110289399|110289326|110289083|110289846|110289782|110289098…	chr12	110289399	110289655	AluSq	-
airway_epithelial_cell	chr12	120379018	120379019	+	120379018	153	153	153	6.38063	3.85218	120379338|120379190|120379366|120379339|120379369|120379347|120379360|120379344|120379348|120379346|120379202|120379367|120379343|120379216|120379340|120379184|120379372|120379337|120379157|120379365|120379271|120379350|120379258|120379371|120379328|120379341|120379336|120379197|120379349|120379324|120379370	chr12	120379020	120379316	AluSq	+
airway_epithelial_cell	chr12	21833105	21833106	+	21833105	20	20	20	0.83407	3.2037	21833279|21833479|21833291|21833231|21833280|21833278|21833457|21833285|21833283|21833395|21833247	chr12	21833106	21833407	AluY	+
airway_epithelial_cell	chr1	226276994	226276997	-	226276994	46	46	52	2.16858	4.10825	226276852|226276693|226276664|226276840|226276656|226276661|226276660|226276658|226276665|226276691|226276663|226276667|226276659|226276657|226276687|226276675|226276680|226276695|226276666|226276684|226276677|226276676|226276662	chr1	226276675	226276995	AluSg	-
airway_epithelial_cell	chr1	228291168	228291218	+	228291217	6	6	25	1.04259	3.70347	228291788|228291655|228291849|228291653|228291795|228292293|228291647|228291649|228291394|228292296|228291713|228291641|228291800|228291827	chr1	228291219	228291508	AluSz	+
airway_epithelial_cell	chr1	231701164	231701189	+	231701188	5	5	9	0.375331	2.5	231701595|231701588|231701594|231701593|231701708|231701591	chr1	231701189	231701495	AluSg	+
airway_epithelial_cell	chr1	246932881	246932882	+	246932881	24	24	24	1.00088	3.4906	246933178|246933148|246933207|246933208|246933181|246933058|246933067|246933056|246933210|246933211|246933057|246933059|246933168	chr1	246932882	246933190	AluSx1	+
airway_epithelial_cell	chr12	46943017	46943019	+	46943017	8	9	10	0.417035	2.72548	46943239|46943246|46943279|46943278|46943244|46943277|46943475	chr12	46942985	46943296	AluSx3	+
airway_epithelial_cell	chr1	24754452	24754462	+	24754452	11	11	13	0.542145	3.2389	24754781|24754792|24754780|24754779|24754783|24754750|24754752|24754766|24754778|24754777	chr1	24754463	24754744	AluJb	+
airway_epithelial_cell	chr1	24842352	24842353	+	24842352	45	45	47	1.96006	3.96361	24842644|24842666|24842586|24842691|24842700|24842669|24842677|24842699|24842599|24842650|24842668|24842662|24842634|24842649|24842525|24842645|24842671|24842643|24842635	chr1	24842352	24842657	AluSg	+
airway_epithelial_cell	chr12	52883295	52883322	-	52883321	7	8	15	0.625552	3.05656	52882790|52882907|52882828|52882869|52882830|52882812|52882832|52882831|52882833	chr12	52883056	52883353	AluSx3	-
airway_epithelial_cell	chr1	27234386	27234388	+	27234387	7	12	12	0.500442	2.9183	27234776|27234770|27234704|27234807|27234805|27234702|27234756|27234751	chr1	27234387	27234681	AluSq	+
airway_epithelial_cell	chr12	77147460	77147461	-	77147460	10	10	10	0.417035	2.64644	77147284|77147228|77147283|77147233|77147289|77147280|77147288	chr12	77147188	77147461	AluSg	-
airway_epithelial_cell	chr12	80088249	80088250	-	80088249	14	14	15	0.625552	2.95021	80088058|80087839|80088054|80087963|80088050|80088056|80087939|80087967|80088051	chr12	80087918	80088250	AluY	-
airway_epithelial_cell	chr12	80141954	80141955	-	80141954	40	40	42	1.75155	3.13321	80141679|80141674|80141819|80141672|80141680|80141675|80141678|80141671|80141673|80141676|80141529|80141677	chr12	80141635	80141955	AluSg7	-
airway_epithelial_cell	chr12	87551830	87551831	+	87551830	27	27	27	1.12599	3.5501	87552084|87552133|87552035|87552137|87552059|87552034|87552055|87552036|87552088|87552045|87552131|87552087|87552093|87552134|87552094|87552091|87552027	chr12	87551831	87552137	AluSp	+
airway_epithelial_cell	chr1	31545518	31545519	+	31545518	9	9	9	0.375331	3.16993	31545847|31545635|31545843|31545643|31546041|31545974|31545656|31545774|31545876	chr1	31545507	31545620	AluJo	+
airway_epithelial_cell	chr13	21524636	21524637	-	21524636	31	31	31	1.29281	4.54275	21524183|21524317|21524377|21524320|21524318|21524316|21524329|21524356|21524184|21524174|21524286|21524330|21524328|21524188|21524187|21524297|21524192|21524367|21524193|21524296|21524325|21524308|21524218|21524180|21524322	chr13	21524503	21524636	AluYb8	-
airway_epithelial_cell	chr1	32696857	32696876	+	32696866	2	2	10	0.417035	2.92193	32697117|32697119|32697106|32697101|32697120|32697114|32697126|32697116	chr1	32696812	32697110	AluSp	+
airway_epithelial_cell	chr13	50380559	50380560	+	50380559	9	9	10	0.417035	2.9477	50380812|50380712|50380694|50380777|50380736|50380724|50380853|50380855	chr13	50380560	50380871	AluSg7	+
airway_epithelial_cell	chr1	39470768	39470803	+	39470795	4	5	10	0.417035	2.72193	39471395|39471077|39471202|39471204|39471476|39471201|39471303	chr1	39470695	39470995	AluSx1	+
airway_epithelial_cell	chr13	96034791	96034792	-	96034791	14	14	14	0.583849	3.03915	96034606|96034644|96034659|96034653|96034617|96034654|96034607|96034650|96034651	chr13	96034553	96034792	AluSx	-
airway_epithelial_cell	chr13	99319520	99319522	+	99319520	6	8	8	0.333628	2.5	99319840|99319818|99319843|99319817|99319819|99319823	chr13	99319523	99319823	AluSg	+
airway_epithelial_cell	chr1	40350032	40350033	+	40350032	20	20	20	0.83407	3.92193	40350338|40350179|40350318|40350332|40350166|40350178|40350138|40350337|40350333|40350171|40350181|40350304|40350168|40350177|40350325|40350315	chr1	40350032	40350338	AluSx	+
airway_epithelial_cell	chr1	40399062	40399063	+	40399062	8	8	8	0.333628	2.5	40399374|40399244|40399238|40399364|40399363|40399241	chr1	40399063	40399364	AluSz	+
airway_epithelial_cell	chr14	100046919	100046920	+	100046919	12	12	12	0.500442	2.85539	100047369|100047290|100047279|100047289|100047284|100047288|100047367|100047286	chr14	100046919	100047219	AluSx1	+
airway_epithelial_cell	chr14	103288098	103288099	+	103288098	14	14	14	0.583849	3.18201	103288391|103288356|103288401|103288293|103288409|103288390|103288368|103288393|103288404|103288406	chr14	103288098	103288406	AluSg	+
airway_epithelial_cell	chr14	23399941	23399942	+	23399941	22	22	23	0.95918	3.20899	23400216|23400212|23400224|23400208|23400215|23400214|23400206|23400213|23400209|23400217	chr14	23399941	23400208	AluSq	+
airway_epithelial_cell	chr14	31528100	31528117	-	31528109	3	3	8	0.333628	2.52164	31527750|31527768|31527755|31527738|31527744|31527757	chr14	31527785	31528081	AluJo	-
airway_epithelial_cell	chr14	52924994	52924995	+	52924994	46	46	46	1.91836	3.00729	52925287|52925288|52925284|52925280|52925277|52925278|52925285|52925239|52925275|52925200|52925289|52925194|52925198|52925283|52925282|52925293|52925241	chr14	52924994	52925278	AluSz	+
airway_epithelial_cell	chr14	64063234	64063235	-	64063234	7	7	7	0.291924	2.52164	64062868|64062852|64062860|64062865|64062864|64062415	chr14	64062937	64063231	AluSq2	-
airway_epithelial_cell	chr14	67851952	67851986	+	67851969	3	3	11	0.458738	2.91398	67852362|67852337|67852335|67852338|67852721|67852613|67852340|67852334	chr14	67852027	67852180	AluJr4	+
airway_epithelial_cell	chr14	68144523	68144643	-	68144572	7	7	55	2.29369	5.19954	68143896|68144166|68143985|68144411|68144114|68144026|68144148|68144305|68144363|68144279|68144298|68144300|68144308|68144161|68144288|68144159|68144158|68144025|68144311|68144290|68144289|68144294|68144150|68144172|68144310|68143986|68144286|68144299|68144341|68144030|68144157|68144306|68144281|68144291|68144315|68144434|68144028|68144297|68144120|68144156|68144287	chr14	68144496	68144578	AluSq10	-
airway_epithelial_cell	chr14	68778322	68778329	+	68778322	5	5	7	0.291924	2.52164	68778677|68778678|68778676|68778641|68778648|68778650	chr14	68778323	68778632	AluSg	+
airway_epithelial_cell	chr14	70273470	70273472	+	70273470	13	26	27	1.12599	3.25776	70273837|70273842|70273816|70273801|70273841|70273821|70273799|70273838|70273574|70273839|70273824|70273788	chr14	70273471	70273769	AluSz	+
airway_epithelial_cell	chr14	77538957	77538958	+	77538957	21	21	21	0.875773	3.82089	77539136|77539437|77539434|77539457|77539264|77539432|77539284|77539283|77539361|77539359|77539285|77539290|77539365|77539131|77539436|77539286	chr14	77538919	77539163	AluSp	+
airway_epithelial_cell	chr1	48662020	48662021	-	48662020	685	689	690	28.7754	3.9715	48661876|48661873|48661882|48661866|48661877|48661868|48661880|48661878|48661875|48661865|48661871|48661869|48661874|48661879|48661863|48661870|48661872|48661867|48661881	chr1	48661883	48662019	FLAM_C	-
airway_epithelial_cell	chr14	93618097	93618098	-	93618097	8	8	8	0.333628	2.5	93617681|93617708|93617710|93617995|93617932|93617933	chr14	93617787	93618096	AluSz6	-
airway_epithelial_cell	chr15	65869520	65869547	+	65869546	5	5	13	0.542145	3.02205	65869909|65869761|65869781|65869840|65869799|65869923|65869824|65869791|65869800	chr15	65869491	65869764	AluJr	+
airway_epithelial_cell	chr15	93368958	93368961	-	93368958	44	44	48	2.00177	3.71328	93368608|93368637|93368662|93368578|93368807|93368642|93368639|93368641|93368646|93368654|93368640|93368730|93368575|93368690|93368643|93368771|93368652|93368806	chr15	93368667	93368959	AluSc	-
airway_epithelial_cell	chr16	11600179	11600180	-	11600179	8	8	9	0.375331	3	11599857|11600002|11599609|11599882|11600039|11599979|11599758|11599865	chr16	11599879	11600180	AluSq	-
airway_epithelial_cell	chr16	14743884	14743937	+	14743896	3	3	14	0.583849	2.64559	14744351|14744358|14744360|14744359|14744350|14744354|14744355	chr16	14743897	14744191	AluSz	+
airway_epithelial_cell	chr1	61523585	61523586	-	61523585	129	129	132	5.50486	4.76406	61523392|61523362|61523274|61523290|61523272|61523296|61523454|61523245|61523318|61523279|61523243|61523448|61523409|61523346|61523299|61523451|61523421|61523420|61523295|61523288|61523292|61523254|61523298|61523248|61523360|61523435|61523300|61523357|61523293|61523449|61523345|61523249|61523422|61523269|61523246|61523406|61523294|61523316|61523247|61523408|61523291|61523297|61523430|61523344	chr1	61523296	61523586	AluSq2	-
airway_epithelial_cell	chr16	19513954	19513970	-	19513969	9	9	12	0.500442	2.84535	19513619|19513433|19513435|19513487|19513827|19513482|19513488|19513543	chr16	19513696	19513980	AluJr	-
airway_epithelial_cell	chr16	20913160	20913166	+	20913160	5	5	9	0.375331	2.50326	20913526|20913296|20913446|20913496|20913440|20913521	chr16	20913165	20913446	AluSg	+
airway_epithelial_cell	chr16	3313666	3313668	-	3313666	87	94	97	4.04524	5.04228	3313416|3313421|3313382|3313346|3313347|3313352|3313490|3313359|3313386|3313423|3313374|3313350|3313377|3313349|3313366|3313360|3313487|3313355|3313419|3313415|3313420|3313379|3313412|3313468|3313351|3313362|3313368|3313452|3313460|3313491|3313356|3313414|3313364|3313380|3313413|3313417|3313489|3313367|3313418|3313422|3313402	chr16	3313366	3313666	AluSg	-
airway_epithelial_cell	chr1	6476125	6476148	-	6476132	2	2	7	0.291924	2.80735	6475819|6475492|6475320|6475800|6475834|6475651|6475849	chr1	6475836	6476137	AluSx1	-
airway_epithelial_cell	chr16	48496092	48496097	-	48496096	67	67	80	3.33628	3.97865	48495840|48495957|48495846|48495914|48495907|48495908|48495887|48495905|48495909|48495843|48495906|48495915|48495799|48495910|48495805|48495891|48495896|48495802|48495911|48495916|48495913|48495912|48495839|48495882	chr16	48495797	48496086	AluSx1	-
airway_epithelial_cell	chr16	66978093	66978128	+	66978093	4	4	11	0.458738	2.66353	66978781|66978279|66978324|66978874|66978703|66978535|66978473	chr16	66978092	66978226	FLAM_A	+
airway_epithelial_cell	chr16	66978415	66978434	+	66978417	3	5	9	0.375331	2.50326	66978791|66978921|66978666|66978964|66978841|66978835	chr16	66978366	66978679	AluSq	+
airway_epithelial_cell	chr16	67813853	67813854	+	67813853	8	8	8	0.333628	2.75	67814163|67814194|67814175|67814207|67814058|67814199|67814056	chr16	67813854	67814161	AluSc	+
airway_epithelial_cell	chr16	68993208	68993209	+	68993208	104	105	107	4.46227	4.30478	68993604|68993518|68993521|68993576|68993380|68993577|68993600|68993568|68993514|68993510|68993532|68993528|68993513|68993607|68993606|68993603|68993598|68993530|68993515|68993383|68993520|68993601|68993578|68993597|68993522|68993612|68993519|68993531|68993527|68993382|68993605|68993602	chr16	68993209	68993519	AluSg	+
airway_epithelial_cell	chr16	74735240	74735242	+	74735240	20	21	23	0.95918	3.07558	74735417|74735445|74832322|74735430|74735421|74735422|74735444|74735446|74735448|74735423|74735447	chr16	74735244	74735452	AluSx	+
airway_epithelial_cell	chr16	79674141	79674142	+	79674141	10	10	11	0.458738	2.72193	79674541|79674533|79674532|79674531|79674448|79674621|79674618	chr16	79674141	79674448	AluY	+
airway_epithelial_cell	chr1	67996973	67996978	-	67996977	8	8	10	0.417035	2.52193	67996682|67996676|67996683|67996815|67996675|67996674|67996825	chr1	67996675	67996978	AluSz6	-
airway_epithelial_cell	chr17	38635700	38635701	-	38635700	32	32	32	1.33451	4.26532	38635155|38635096|38635220|38635219|38635168|38635082|38635106|38635309|38635118|38635091|38635112|38635104|38635371|38635102|38635313|38635069|38635228|38635223|38635095|38635521|38635107	chr17	38635413	38635698	AluSx	-
airway_epithelial_cell	chr17	40555209	40555261	-	40555209	6	6	16	0.667256	3.07782	40554559|40554816|40554820|40554650|40554498|40554499|40554713|40554790|40554484|40554870	chr17	40555091	40555246	AluJr	-
airway_epithelial_cell	chr17	40555957	40556001	-	40555957	4	4	14	0.583849	3.52164	40555457|40555530|40555532|40555646|40555606|40555518|40555655|40555645|40555498|40555512|40555389|40555538	chr17	40555639	40555958	AluSx	-
airway_epithelial_cell	chr17	41498990	41498991	+	41498990	252	253	259	10.8012	2.95919	41499371|41499162|41499375|41499358|41499378|41499374|41499376|41499361|41499360|41499363|41499377|41499372|41499370|41499373|41499202|41499379|41499163|41499369|41499353|41499336|41499388|41499357|41499170|41499337	chr17	41498990	41499297	AluSg4	+
airway_epithelial_cell	chr17	4311712	4311720	+	4311719	11	11	13	0.542145	3.2389	4311886|4311910|4311914|4311933|4311916|4311932|4311919|4311915|4311920|4311918	chr17	4311709	4311821	FLAM_A	+
airway_epithelial_cell	chr17	4546997	4546998	-	4546997	6	6	6	0.250221	2.58496	4546692|4546687|4546679|4546693|4546745|4546701	chr17	4546685	4546997	AluSx1	-
airway_epithelial_cell	chr17	47270440	47270498	+	47270440	9	9	22	0.917477	4.00489	47270974|47270968|47270963|47270907|47270965|47270929|47271011|47270958|47270979|47270892|47271003|47270896|47270956|47271000|47270966|47270931|47270985	chr17	47270546	47270858	AluSx	+
airway_epithelial_cell	chr17	47647379	47647380	-	47647379	26	26	27	1.12599	3.87314	47647205|47647047|47647061|47647046|47647070|47647242|47647079|47647240|47647208|47647078|47647054|47647068|47647067|47647072|47647071|47647077|47647073|47647204	chr17	47647071	47647376	AluSx	-
airway_epithelial_cell	chr17	64248089	64248090	+	64248089	6	6	6	0.250221	2.58496	64248375|64248387|64248377|64248381|64248385|64248326	chr17	64248089	64248369	AluSq2	+
airway_epithelial_cell	chr17	6585192	6585193	-	6585192	7	7	7	0.291924	2.52164	6584806|6585058|6584880|6584878|6584851|6584901	chr17	6584903	6585190	AluSg7	-
airway_epithelial_cell	chr17	73435514	73435515	-	73435514	7	7	7	0.291924	2.80735	73435303|73435192|73435147|73435149|73435196|73435193|73435151	chr17	73435262	73435515	AluSx3	-
airway_epithelial_cell	chr17	73435787	73435788	+	73435787	23	23	23	0.95918	3.76227	73436154|73436158|73436078|73436002|73436121|73436159|73436157|73436075|73436074|73436164|73436155|73435973|73436167|73436163|73436166	chr17	73435787	73436082	AluSp	+
airway_epithelial_cell	chr1	8118719	8118720	+	8118719	42	42	42	1.75155	3.8496	8118985|8118971|8118825|8118966|8118986|8119075|8118931|8119082|8118984|8118975|8119073|8118970|8118972|8119024|8118981|8118982|8118968|8118977|8118934	chr1	8118719	8119024	AluSq2	+
airway_epithelial_cell	chr18	29056680	29056689	+	29056680	6	6	12	0.500442	2.58496	29056988|29057252|29057031|29057040|29057036|29057066|29056992	chr18	29056640	29056950	AluYb8	+
airway_epithelial_cell	chr18	56460990	56460991	+	56460990	19	20	20	0.83407	3.42637	56461297|56461306|56461291|56461282|56461162|56461305|56461290|56461154|56461304|56461303|56461296|56461163|56461161	chr18	56460990	56461280	AluSz6	+
airway_epithelial_cell	chr18	64289290	64289291	+	64289290	299	306	307	12.803	3.43854	64289470|64289461|64289458|64289454|64289460|64289475|64289469|64289456|64289462|64289465|64289476|64289463|64289477|64289478|64289464|64289468|64289467|64289473|64289457|64289471|64289472|64289474|64289437	chr18	64289291	64289427	FLAM_C	+
airway_epithelial_cell	chr18	72187730	72187801	+	72187751	4	4	28	1.1677	4.23593	72188030|72188276|72187964|72188033|72188280|72188292|72188296|72188286|72188040|72188291|72188275|72188278|72188027|72188050|72188343|72188277|72188044|72188029|72188279|72188341	chr18	72187608	72187899	AluJr	+
airway_epithelial_cell	chr18	72187865	72187878	+	72187872	4	4	10	0.417035	2.64644	72188276|72188278|72188346|72188342|72188274|72188289|72188286	chr18	72187905	72188070	AluJo	+
airway_epithelial_cell	chr1	8793885	8793888	+	8793887	6	8	8	0.333628	2.75	8794121|8794122|8794058|8794055|8794147|8794181|8794215	chr1	8793887	8794192	AluSx1	+
airway_epithelial_cell	chr1	9069775	9069781	-	9069780	25	25	48	2.00177	3.40435	9069477|9069482|9069483|9069511|9069479|9069480|9069473|9069481|9069475|9069484|9069476|9069474|9069478	chr1	9069512	9069816	AluJb	-
airway_epithelial_cell	chr19	11243244	11243269	+	11243257	3	3	7	0.291924	2.52164	11243476|11243959|11243558|11244340|11243436|11243373	chr19	11243111	11243420	AluYb8	+
airway_epithelial_cell	chr19	15208942	15208943	-	15208942	14	14	14	0.583849	3.23593	15208631|15208571|15208632|15208628|15208629|15208630|15208643|15208624|15208527|15208441	chr19	15208643	15208943	AluSx1	-
airway_epithelial_cell	chr19	15422319	15422320	+	15422319	12	12	12	0.500442	3.08496	15422728|15422738|15422620|15422720|15422722|15422708|15422762|15422724|15422727	chr19	15422319	15422648	AluSq	+
airway_epithelial_cell	chr19	21949512	21949513	+	21949512	7	7	7	0.291924	2.80735	21949711|21949760|21949716|21949698|21949822|21949648|21949831	chr19	21949513	21949808	AluSx3	+
airway_epithelial_cell	chr19	2984764	2984765	-	2984764	14	14	14	0.583849	2.63846	2984601|2984474|2984472|2984466|2984469|2984468|2984467|2984473	chr19	2984467	2984765	AluSx	-
airway_epithelial_cell	chr19	3718894	3718900	+	3718899	16	16	22	0.917477	3.69785	3719195|3719189|3719101|3719197|3719194|3719196|3719193|3719072|3719192|3719198|3719127|3719122|3719103|3719049|3719139	chr19	3718899	3719179	AluSx1	+
airway_epithelial_cell	chr19	45694677	45694678	-	45694677	8	8	8	0.333628	2.5	45694309|45694425|45694302|45694306|45694473|45694505	chr19	45694369	45694678	AluSp	-
airway_epithelial_cell	chr19	4838881	4838911	-	4838891	5	7	17	0.708959	2.91099	4838756|4838368|4838369|4838757|4838367|4838365|4838366|4838370|4838364	chr19	4838584	4838892	AluSq2	-
airway_epithelial_cell	chr1	94999621	94999649	-	94999623	4	6	11	0.458738	3.32193	94999390|94999399|94998885|94999336|94999281|94999257|94999392|94999387|94999244|94999321	chr1	94999407	94999722	AluSx1	-
airway_epithelial_cell	chr19	50640583	50640588	-	50640583	120	120	154	6.42234	4.31061	50640365|50640360|50640400|50640399|50640362|50640369|50640366|50640429|50640364|50640371|50640437|50640398|50640368|50640373|50640378|50640359|50640422|50640383|50640375|50640358|50640408|50640372|50640363|50640404|50640370|50640402|50640391|50640390|50640397|50640361|50640367	chr19	50640452	50640584	AluYa5	-
airway_epithelial_cell	chr19	54959774	54959786	+	54959779	3	3	7	0.291924	2.52164	54960132|54960079|54960127|54960136|54960213|54960130	chr19	54959829	54960119	AluSx	+
airway_epithelial_cell	chr20	19866025	19866028	+	19866027	7	12	12	0.500442	2.85539	19866345|19866284|19866343|19866340|19866368|19866206|19866344|19866342	chr20	19866027	19866345	AluSz	+
airway_epithelial_cell	chr20	34545226	34545227	+	34545226	17	17	17	0.708959	2.82218	34545569|34545576|34545566|34545568|34545402|34545577|34545578|34545575	chr20	34545226	34545410	AluSx	+
airway_epithelial_cell	chr20	36815597	36815598	+	36815597	20	21	21	0.875773	2.94644	36815898|36816013|36815902|36815888|36815897|36816012|36816312|36815803|36815901|36815899	chr20	36815564	36815842	AluSx	+
airway_epithelial_cell	chr20	46060983	46060985	-	46060983	7	9	9	0.375331	2.72548	46060688|46060692|46060799|46060689|46060684|46060687|46060864	chr20	46060687	46060984	AluY	-
airway_epithelial_cell	chr20	49109605	49109610	-	49109609	6	6	11	0.458738	3.09579	49109427|49109310|49109326|49109421|49109317|49109301|49109240|49109338|49109311	chr20	49109293	49109605	AluSq	-
airway_epithelial_cell	chr2	10260561	10260562	+	10260561	7	8	8	0.333628	2.80735	10260909|10260906|10260841|10260660|10260896|10261042|10260976	chr2	10260549	10260662	FLAM_C	+
airway_epithelial_cell	chr2	109302985	109303017	+	109302995	4	4	8	0.333628	2.75	109303356|109303267|109303491|109303604|109303357|109303486|109303439	chr2	109302945	109303246	AluY	+
airway_epithelial_cell	chr2	110375447	110375510	+	110375452	3	3	13	0.542145	3.02699	110375752|110375958|110375682|110375755|110375988|110375889|110376032|110375987|110375864	chr2	110375313	110375610	AluSz6	+
airway_epithelial_cell	chr2	112763758	112763759	-	112763758	78	81	81	3.37798	4.8172	112763456|112763451|112763583|112763426|112763594|112763467|112763561|112763460|112763584|112763560|112763586|112763652|112763595|112763592|112763578|112763455|112763452|112763651|112763458|112763558|112763461|112763591|112763459|112763551|112763437|112763453|112763637|112763554|112763653|112763501|112763433|112763593|112763468|112763555|112763650|112763454	chr2	112763455	112763758	AluSz	-
airway_epithelial_cell	chr2	11478067	11478068	-	11478067	9	9	9	0.375331	2.9477	11477756|11477759|11477766|11477758|11477763|11477762|11477765|11477764	chr2	11477758	11478068	AluSz	-
airway_epithelial_cell	chr2	122523951	122523989	+	122523951	3	3	8	0.333628	2.52164	122524679|122524174|122524440|122524618|122524694|122524621	chr2	122523897	122524029	AluJo	+
airway_epithelial_cell	chr2	136664880	136664978	-	136664880	6	6	38	1.58473	2.87806	136664657|136664522|136664517|136664525|136664518|136664519|136664405|136664520|136664521	chr2	136664808	136664874	AluJo	-
airway_epithelial_cell	chr21	41048668	41048669	+	41048668	24	24	24	1.00088	4.13684	41049061|41048992|41048994|41049026|41048954|41049009|41048966|41049055|41048993|41048830|41049060|41049012|41048840|41049057|41049059|41048958|41049007|41048969|41048839	chr21	41048668	41048971	AluSx	+
airway_epithelial_cell	chr21	46189571	46189617	-	46189594	4	4	11	0.458738	2.55034	46189023|46189138|46189124|46189177|46189264|46189257	chr21	46189293	46189592	AluY	-
airway_epithelial_cell	chr2	151130859	151130861	+	151130859	7	11	11	0.458738	2.91398	151131141|151131153|151131155|151131066|151131064|151131054|151131152|151131095	chr2	151130860	151131153	AluSq2	+
airway_epithelial_cell	chr2	170676760	170676765	-	170676764	23	23	26	1.08429	3.74833	170676459|170676573|170676550|170676456|170676504|170676561|170676461|170676571|170676507|170676453|170676569|170676631|170676570|170676572|170676458|170676564	chr2	170676480	170676765	AluSp	-
airway_epithelial_cell	chr2	172177915	172177956	-	172177925	3	3	8	0.333628	3	172177514|172177509|172177698|172177599|172177518|172177619|172177513|172177512	chr2	172177802	172177979	AluJb	-
airway_epithelial_cell	chr2	208105053	208105124	+	208105111	5	5	20	0.83407	3.82193	208105385|208105337|208105280|208105606|208105595|208105584|208105388|208105999|208105258|208105397|208105254|208105871|208105668|208105575|208105867|208105783	chr2	208105084	208105234	AluJb	+
airway_epithelial_cell	chr2	208519164	208519165	+	208519164	7	7	7	0.291924	2.52164	208519414|208519410|208519359|208519419|208519417|208519409	chr2	208519164	208519461	AluSp	+
airway_epithelial_cell	chr2	219152128	219152150	+	219152133	5	5	11	0.458738	3.27761	219152465|219152490|219152868|219152463|219152460|219152481|219152374|219152464|219152491|219152462	chr2	219152150	219152444	AluSc8	+
airway_epithelial_cell	chr2	220125413	220125414	+	220125413	80	81	81	3.37798	3.57668	220125663|220125585|220125659|220125674|220125666|220125688|220125587|220125675|220125657|220125590|220125658|220125673|220125668|220125660|220125664|220125662|220125671|220125665|220125661|220125669	chr2	220125413	220125721	AluSq2	+
airway_epithelial_cell	chr2	220595927	220595928	-	220595927	20	20	20	0.83407	3.58418	220595585|220595448|220595564|220595802|220595798|220595797|220595694|220595678|220595693|220595696|220595702|220595587|220595796	chr2	220595795	220595928	AluSz	-
airway_epithelial_cell	chr22	25186760	25186761	-	25186760	32	32	32	1.33451	4.3872	25186499|25186489|25186575|25186443|25186479|25186514|25186473|25186516|25186495|25186619|25186624|25186627|25186612|25186492|25186445|25186564|25186457|25186574|25186528|25186491|25186586|25186584|25186527|25186569	chr22	25186545	25186760	AluSx1	-
airway_epithelial_cell	chr2	225229336	225229338	+	225229336	14	16	16	0.667256	3.20282	225229638|225229590|225229661|225229506|225229505|225229521|225229655|225229504|225229639|225229509	chr2	225229336	225229635	AluY	+
airway_epithelial_cell	chr22	31457383	31457384	+	31457383	6	6	6	0.250221	2.58496	31457554|31457558|31457585|31457613|31457601|31457807	chr22	31457383	31457599	AluSp	+
airway_epithelial_cell	chr2	23503596	23503597	+	23503596	11	11	11	0.458738	3.09579	23503919|23503855|23503849|23503850|23503891|23503859|23503915|23503701|23503914	chr2	23503596	23503907	AluSg	+
airway_epithelial_cell	chr2	238673648	238673714	+	238673708	7	7	25	1.04259	3.17353	238673919|238673926|238674217|238674218|238673924|238673921|238673970|238673925|238673920|238673931|238673923|238673915	chr2	238673622	238673922	AluSq2	+
airway_epithelial_cell	chr22	42997234	42997235	+	42997234	167	169	174	7.25641	2.64154	42997395|42997394|42997399|42997403|42997400|42997404|42997422|42997396|42997398|42997393|42997392|42997397	chr22	42997234	42997370	FLAM_C	+
airway_epithelial_cell	chr22	45147010	45147011	+	45147010	7	7	7	0.291924	2.52164	45147315|45147381|45147385|45147380|45147307|45147383	chr22	45147010	45147288	AluSx1	+
airway_epithelial_cell	chr2	25198587	25198588	+	25198587	22	22	23	0.95918	3.84535	25198893|25198892|25198763|25198931|25198883|25198878|25198884|25198930|25198887|25198885|25198890|25198768|25198894|25198851|25198888|25198907	chr2	25198588	25198895	AluSc8	+
airway_epithelial_cell	chr2	30668472	30668474	+	30668473	9	11	11	0.458738	3.27761	30668775|30668694|30668976|30668941|30668862|30668771|30668997|30668840|30668866|30668943	chr2	30668474	30668779	AluJb	+
airway_epithelial_cell	chr2	32456968	32456969	-	32456968	12	12	13	0.542145	2.85539	32456559|32456656|32456631|32456654|32456655|32456650|32456660|32456659	chr2	32456616	32456928	AluJb	-
airway_epithelial_cell	chr2	39457237	39457238	+	39457237	15	16	16	0.667256	3.37356	39457493|39457400|39457500|39457505|39457415|39457489|39457492|39457413|39457487|39457488|39457502	chr2	39457238	39457497	AluSp	+
airway_epithelial_cell	chr2	45186094	45186095	-	45186094	17	18	18	0.750663	2.98423	45185800|45185689|45185734|45185777|45185706|45185773|45185729|45185730|45185909	chr2	45185761	45186095	AluSz	-
airway_epithelial_cell	chr2	54268382	54268389	-	54268382	16	16	19	0.792366	3.21584	54268169|54268108|54268116|54268107|54268099|54268098|54268186|54268097|54268191|54268171|54268190	chr2	54268250	54268383	AluJb	-
airway_epithelial_cell	chr2	65794640	65794642	+	65794640	12	13	14	0.583849	3.2389	65794823|65794817|65794781|65794818|65794824|65794828|65794831|65794820|65794990|65794968	chr2	65794640	65794929	AluY	+
airway_epithelial_cell	chr2	70504818	70504857	+	70504835	3	3	10	0.417035	2.92193	70505373|70505369|70505292|70505222|70505159|70505375|70505372|70505016	chr2	70504783	70504888	AluSq2	+
airway_epithelial_cell	chr2	70844991	70844992	+	70844991	23	23	24	1.00088	3.43141	70845280|70845249|70845308|70845389|70845250|70845349|70845269|70845248|70845272|70845275|70845274|70845277|70845276	chr2	70844991	70845269	AluSx	+
airway_epithelial_cell	chr2	85173157	85173216	-	85173188	29	38	49	2.04347	3.34164	85172945|85172942|85172940|85172951|85172946|85172957|85172953|85172947|85172952|85172950|85172949|85172955|85172941|85172948|85172943|85172954	chr2	85172972	85173137	AluJo	-
airway_epithelial_cell	chr2	86731758	86731787	-	86731758	5	5	10	0.417035	2.72548	86731457|86731456|86731464|86731458|86731067|86731469|86731460	chr2	86731634	86731769	FLAM_C	-
airway_epithelial_cell	chr3	117234284	117234285	-	117234284	16	16	16	0.667256	3.125	117234040|117234046|117234130|117234031|117233995|117234039|117233888|117234035|117234034|117234038	chr3	117233995	117234285	AluSz	-
airway_epithelial_cell	chr3	119898460	119898461	-	119898460	19	19	19	0.792366	3.61635	119898193|119898194|119898285|119898196|119898201|119898286|119898192|119898191|119898199|119898147|119898200|119898155|119898186|119898187	chr3	119898192	119898461	AluSz	-
airway_epithelial_cell	chr3	12775726	12775756	-	12775738	3	3	13	0.542145	2.81507	12775087|12775042|12775089|12775224|12775088|12775086|12775092|12775311	chr3	12775392	12775710	AluJr	-
airway_epithelial_cell	chr3	128399477	128399496	-	128399481	11	11	17	0.708959	3.21953	128399210|128399144|128399008|128399279|128399143|128399153|128399267|128399209|128399147|128398879|128398880	chr3	128399192	128399478	AluSg	-
airway_epithelial_cell	chr3	156849683	156849694	-	156849683	7	7	9	0.375331	2.72548	156849352|156849353|156849348|156849351|156849349|156849360|156849346	chr3	156849355	156849638	AluJb	-
airway_epithelial_cell	chr3	170021588	170021603	+	170021588	3	3	7	0.291924	2.80735	170022086|170021861|170022263|170022343|170021967|170022351|170021863	chr3	170021501	170021780	AluSz	+
airway_epithelial_cell	chr3	176967337	176967338	+	176967337	11	11	11	0.458738	3.27761	176967629|176967618|176967641|176967626|176967643|176967631|176967642|176967644|176967645|176967686	chr3	176967338	176967621	AluJb	+
airway_epithelial_cell	chr3	190142431	190142438	+	190142437	34	34	40	1.66814	4.21426	190142760|190142770|190142583|190142774|190142780|190142749|190142777|190142763|190142764|190142772|190142761|190142592|190142769|190142584|190142586|190142585|190142587|190142778|190142768|190142603|190142756	chr3	190142438	190142703	AluSx1	+
airway_epithelial_cell	chr3	195183799	195183800	-	195183799	92	92	96	4.00353	3.25021	195183503|195183506|195183512|195183468|195183509|195183637|195183571|195183507|195183471|195183589|195183504|195183460|195183489|195183470|195183607|195183458|195183482|195183510|195183582|195183505|195183477|195183466|195183508	chr3	195183508	195183800	AluSp	-
airway_epithelial_cell	chr3	195641489	195641494	-	195641493	35	37	39	1.62644	3.34055	195641066|195641044|195641043|195641040|195641045|195641113|195641038|195641048|195641047|195641359|195641059|195641046|195641042|195641039|195641204	chr3	195641221	195641494	AluSx	-
airway_epithelial_cell	chr3	196080558	196080591	-	196080570	2	2	6	0.250221	2.58496	196080351|196080254|196080266|196080307|196080394|196080355	chr3	196080343	196080657	AluSx	-
airway_epithelial_cell	chr3	33000089	33000095	-	33000089	25	25	29	1.2094	2.97652	32999842|32999834|32999835|32999875|32999837|32999840|32999841|32999839|32999832|32999823	chr3	33000000	33000087	AluSx	-
airway_epithelial_cell	chr3	48797118	48797119	-	48797118	6	6	6	0.250221	2.58496	48796916|48796957|48797013|48796898|48796956|48796946	chr3	48796817	48797119	AluSp	-
airway_epithelial_cell	chr3	72567507	72567508	+	72567507	16	16	16	0.667256	2.6494	72567811|72567832|72567823|72567834|72567835|72567821|72567822|72567824	chr3	72567507	72567800	AluSg	+
airway_epithelial_cell	chr4	110552036	110552037	-	110552036	16	16	16	0.667256	3.15564	110551740|110551816|110551738|110551742|110551741|110551786|110551862|110551833|110551843|110551863	chr4	110551723	110552036	AluSp	-
airway_epithelial_cell	chr4	110610387	110610396	-	110610395	2	2	6	0.250221	2.58496	110610016|110610022|110610021|110610023|110609921|110609812	chr4	110610137	110610435	AluSp	-
airway_epithelial_cell	chr4	164088119	164088159	+	164088134	3	3	9	0.375331	2.50326	164088346|164088338|164088335|164088460|164088467|164088592	chr4	164088162	164088451	AluSg	+
airway_epithelial_cell	chr4	17661028	17661029	-	17661028	7	7	7	0.291924	2.52164	17660732|17660757|17660731|17660756|17660733|17660758	chr4	17660731	17661029	AluJo	-
airway_epithelial_cell	chr4	186033540	186033546	+	186033540	6	7	8	0.333628	2.52164	186033806|186033805|186033777|186033639|186033646|186033802	chr4	186033540	186033823	AluSz6	+
airway_epithelial_cell	chr4	24599975	24600028	+	24600001	7	7	14	0.583849	2.54952	24600559|24600558|24600670|24600557|24600556|24600565|24600555	chr4	24599944	24600080	AluSx	+
airway_epithelial_cell	chr4	26855455	26855456	-	26855455	23	23	23	0.95918	3.5014	26855254|26855196|26855253|26855290|26855295|26855169|26855256|26855238|26855171|26855156|26855265|26855144|26855130	chr4	26855156	26855456	AluSg	-
airway_epithelial_cell	chr4	43507149	43507150	+	43507149	9	9	9	0.375331	2.6416	43507354|43507459|43507449|43507486|43507448|43507480|43507451	chr4	43507153	43507459	AluSx1	+
airway_epithelial_cell	chr4	57326987	57327000	+	57326993	3	3	7	0.291924	2.80735	57327201|57327202|57327233|57327389|57327351|57327353|57327356	chr4	57326855	57327154	AluSx1	+
airway_epithelial_cell	chr4	685516	685517	+	685516	9	9	9	0.375331	2.6416	685696|685691|685661|685698|685689|685668|685694	chr4	685517	685813	AluSx1	+
airway_epithelial_cell	chr5	132376953	132376964	-	132376960	21	22	32	1.33451	4.47641	132376443|132376440|132376446|132376441|132376483|132376442|132376445|132376469|132376456|132376476|132376444|132376471|132376485|132376467|132376460|132376464|132376466|132376433|132376463|132376470|132376450|132376454|132376452|132376461	chr5	132376605	132376917	AluSx1	-
airway_epithelial_cell	chr5	133972947	133972948	-	133972947	27	27	27	1.12599	3.66193	133972784|133972791|133972795|133972642|133972783|133972782|133972641|133972741|133972796|133972794|133972812|133972640|133972799|133972785	chr5	133972675	133972948	AluSx1	-
airway_epithelial_cell	chr5	137912574	137912575	-	137912574	25	25	26	1.08429	3.53288	137912197|137912194|137912187|137912223|137912192|137912189|137912196|137912186|137912247|137912193|137912199|137912185|137912198	chr5	137912284	137912574	AluSc5	-
airway_epithelial_cell	chr5	159660599	159660600	+	159660599	12	12	12	0.500442	3.25163	159660967|159660776|159660959|159660899|159660750|159660953|159661039|159660807|159660965|159660983	chr5	159660599	159660902	AluSg	+
airway_epithelial_cell	chr5	167982478	167982542	-	167982502	2	2	17	0.708959	3.02864	167982104|167982177|167982061|167982103|167982063|167982180|167981846|167982060|167982175	chr5	167982256	167982547	AluSx	-
airway_epithelial_cell	chr5	179235535	179235536	+	179235535	12	12	12	0.500442	2.62581	179235776|179235763|179235777|179235774|179235671|179235771|179235712	chr5	179235535	179235731	AluSc8	+
airway_epithelial_cell	chr5	42993314	42993373	-	42993341	3	6	14	0.583849	2.95021	42993025|42992571|42992998|42993054|42992916|42993000|42974647|42993019|42993058	chr5	42993009	42993319	AluSx4	-
airway_epithelial_cell	chr5	43557943	43557944	+	43557943	8	8	8	0.333628	2.75	43558253|43558120|43558168|43558244|43558251|43558237|43558187	chr5	43557943	43558251	AluSp	+
airway_epithelial_cell	chr5	55111912	55111913	-	55111912	17	17	17	0.708959	3.49923	55111636|55111589|55111637|55111578|55111605|55111577|55111695|55111631|55111604|55111672|55111633|55111638|55111606	chr5	55111587	55111913	AluSz6	-
airway_epithelial_cell	chr5	79922863	79923062	-	79922918	10	10	99	4.12864	3.73603	79922514|79922634|79922633|79922792|79922646|79922824|79922640|79922625|79922639|79922676|79922644|79922630|79922587|79922642|79922674|79922643|79922627|79922641|79922637|79922638|79922675|79922635	chr5	79922755	79922876	FLAM_A	-
airway_epithelial_cell	chr5	88271358	88271359	+	88271358	137	140	143	5.9636	2.5435	88271523|88271519|88271521|88271522|88271513|88271520|88271508|88271518|88271516|88271525|88271505	chr5	88271358	88271526	FLAM_C	+
airway_epithelial_cell	chr6	122765455	122765485	-	122765455	5	5	16	0.667256	3.37356	122765133|122765138|122765098|122765120|122765139|122765136|122765147|122765140|122765105|122765119|122764981	chr6	122765165	122765430	AluJb	-
airway_epithelial_cell	chr6	138148757	138148758	-	138148757	33	33	33	1.37621	4.41546	138145317|138148433|138148439|138148425|138148333|138148334|138148339|138148429|138148418|138148408|138148338|138148335|138148313|138148417|138148554|138148419|138148551|138148436|138148411|138148426|138148552|138148432|138148423	chr6	138148424	138148726	AluSx1	-
airway_epithelial_cell	chr6	149177450	149177451	-	149177450	54	56	56	2.33539	3.47361	149177150|149177153|149177166|149177236|149177155|149177149|149177151|149177148|149177279|149177154|149177161|149177316|149177146|149177159|149177147	chr6	149177145	149177451	AluSg	-
airway_epithelial_cell	chr6	155424575	155424576	+	155424575	13	13	13	0.542145	3.02699	155424793|155424778|155424792|155424777|155424780|155424781|155424701|155424809|155424779	chr6	155424575	155424879	AluSx	+
airway_epithelial_cell	chr6	19330893	19330897	+	19330893	79	81	87	3.6282	4.40917	19331214|19331203|19331183|19331197|19331207|19331192|19331194|19331208|19331185|19331215|19331212|19331191|19331209|19331189|19331210|19331184|19331152|19331187|19331186|19331213|19331216|19331218|19331188|19331198|19331154|19331205|19331201|19331211|19331193|19331206	chr6	19330896	19331206	AluSz	+
airway_epithelial_cell	chr6	21163899	21163900	+	21163899	9	9	10	0.417035	3.16993	21164152|21164142|21164145|21164186|21164194|21164146|21164164|21164161|21164147	chr6	21163899	21164210	AluSq2	+
airway_epithelial_cell	chr6	26273743	26273744	+	26273743	179	180	181	7.54833	3.81613	26274008|26274010|26273879|26274065|26273877|26274011|26274015|26273887|26273892|26274029|26274036|26273888|26274033|26274028|26273945|26273882|26274035|26273895|26273947|26274019|26274067|26273933|26274034|26273889|26274012|26274027|26273891|26274037|26273893|26273896|26274030|26273946|26274006|26274009|26274007|26273952|26274031|26274032|26274013|26273921|26273890	chr6	26273743	26274032	AluSq2	+
airway_epithelial_cell	chr6	27144348	27144349	+	27144348	12	12	12	0.500442	3.02205	27144643|27144636|27144635|27144510|27144648|27144638|27144637|27144605|27144645	chr6	27144348	27144660	AluSx	+
airway_epithelial_cell	chr6	27212444	27212446	+	27212444	9	10	11	0.458738	2.64644	27212652|27212654|27212653|27212651|27212644|27212577|27212655	chr6	27212444	27212724	AluSz	+
airway_epithelial_cell	chr6	28805596	28805601	+	28805600	9	9	17	0.708959	2.88955	28805773|28805774|28805795|28805785|28805895|28805792|28805899|28805789|28805884	chr6	28805596	28805897	AluY	+
airway_epithelial_cell	chr6	2903050	2903051	-	2903050	80	80	80	3.33628	3.43767	2902753|2902737|2902746|2902740|2902744|2902739|2902865|2902715|2902743|2902745|2902718|2902738|2902714|2902742|2902750|2902741	chr6	2902742	2903051	AluSz	-
airway_epithelial_cell	chr6	30457048	30457049	-	30457048	16	16	16	0.667256	2.73346	30456764|30456795|30456769|30456768|30456770|30456765|30456766	chr6	30456784	30457049	AluSp	-
airway_epithelial_cell	chr6	30460775	30460822	+	30460798	4	4	10	0.417035	2.92193	30461090|30461143|30461557|30461536|30461184|30461543|30461645|30460968	chr6	30460788	30461101	AluSc8	+
airway_epithelial_cell	chr6	30593635	30593662	+	30593635	5	5	15	0.625552	2.7899	30594062|30593885|30593976|30593901|30593904|30593974|30593886|30593958	chr6	30593595	30593888	AluJb	+
airway_epithelial_cell	chr6	42854501	42854536	+	42854501	3	3	12	0.500442	2.91398	42854898|42854748|42855005|42854900|42854926|42854928|42854752|42854896	chr6	42854451	42854749	AluSc	+
airway_epithelial_cell	chr6	74535504	74535520	+	74535519	3	4	7	0.291924	2.52164	74535928|74535768|74535924|74535838|74535779|74536088	chr6	74535421	74535721	AluSg	+
airway_epithelial_cell	chr6	75350910	75350911	-	75350910	6	6	6	0.250221	2.58496	75350618|75350648|75350716|75350622|75350750|75350623	chr6	75350618	75350909	AluY	-
airway_epithelial_cell	chr6	7973844	7973845	-	7973844	10	11	11	0.458738	3.12193	7973488|7973491|7973484|7973496|7973517|7973710|7973561|7973643|7973660	chr6	7973538	7973845	AluSg	-
airway_epithelial_cell	chr6	92403778	92403779	-	92403778	6	6	6	0.250221	2.58496	92403514|92403606|92403605|92403655|92403654|92403485	chr6	92403481	92403779	AluY	-
airway_epithelial_cell	chr7	116147472	116147498	+	116147488	4	4	14	0.583849	3.52164	116147995|116148182|116148126|116147735|116148485|116147993|116148074|116147992|116147874|116148124|116147873|116147994	chr7	116147444	116147755	AluSc	+
airway_epithelial_cell	chr7	127789820	127789821	+	127789820	13	13	13	0.542145	3.08506	127789994|127790124|127789997|127789991|127790121|127790096|127790086|127790123|127790088	chr7	127789820	127790124	AluSz	+
airway_epithelial_cell	chr7	149366384	149366393	-	149366384	7	7	13	0.542145	2.9183	149366221|149366086|149366084|149366085|149366077|149366081|149366083|149366079|149366082	chr7	149366079	149366385	AluSz	-
airway_epithelial_cell	chr7	24814448	24814449	-	24814448	7	7	8	0.333628	2.52164	24814187|24814189|24814194|24814196|24814185|24814198	chr7	24814158	24814449	AluSg	-
airway_epithelial_cell	chr7	32375596	32375597	-	32375596	11	12	12	0.500442	2.66353	32375313|32375303|32375231|32375248|32375232|32375227|32375320	chr7	32375316	32375576	AluJr	-
airway_epithelial_cell	chr7	55770818	55770819	+	55770818	13	13	13	0.542145	2.71929	55770957|55770959|55770943|55770958|55770954|55770955|55770956	chr7	55770818	55771136	AluSz	+
airway_epithelial_cell	chr7	65516429	65516430	+	65516429	18	18	18	0.750663	2.87996	65516838|65516544|65516535|65516536|65516530|65516528|65516704|65516531|65516534|65516547	chr7	65516429	65516577	FLAM_C	+
airway_epithelial_cell	chr7	80572362	80572363	+	80572362	61	62	64	2.66902	4.36315	80572565|80572487|80572547|80572543|80572528|80572497|80572562|80572533|80572544|80572525|80572537|80572574|80572566|80572567|80572530|80572534|80572538|80572545|80572569|80572559|80572549|80572563|80572564|80572557|80572541|80572531|80572532|80572529|80572527|80572571	chr7	80572362	80572508	AluY	+
airway_epithelial_cell	chr7	98928236	98928238	-	98928237	20	24	26	1.08429	4.05351	98927880|98927926|98928104|98927906|98927928|98928051|98928105|98927949|98927930|98927944|98927925|98927941|98927946|98928138|98928102|98927950|98927938|98928061	chr7	98927928	98928237	AluSx1	-
airway_epithelial_cell	chr8	141501953	141501954	+	141501953	39	39	39	1.62644	4.38746	141502280|141502232|141502252|141502367|141502238|141502307|141502242|141502327|141502223|141502218|141502221|141502225|141502246|141502278|141502251|141502328|141502222|141502243|141502093|141502119|141502247|141502220|141502187|141502305	chr8	141501956	141502255	AluSz	+
airway_epithelial_cell	chr8	141656256	141656257	+	141656256	144	150	151	6.29723	5.37429	141656362|141656430|141656429|141656404|141656393|141656452|141656519|141656525|141656514|141656436|141656521|141656395|141656545|141656474|141656409|141656522|141656513|141656550|141656464|141656518|141656396|141656438|141656462|141656406|141656442|141656510|141656555|141656440|141656524|141656446|141656512|141656381|141656394|141656431|141656400|141656523|141656469|141656439|141656434|141656405…	chr8	141656256	141656558	AluY	+
airway_epithelial_cell	chr8	144536879	144536883	-	144536879	14	14	18	0.750663	3.14967	144536699|144536700|144536460|144536739|144536759|144536690|144536479|144536697|144536754|144536668|144536742	chr8	144536572	144536880	AluY	-
airway_epithelial_cell	chr8	17696686	17696694	-	17696686	25	25	29	1.2094	3.82486	17696387|17696398|17696393|17696375|17696512|17696418|17696395|17696523|17696391|17696383|17696425|17696514|17696390|17696394|17696386|17696397	chr8	17696393	17696687	AluSx	-
airway_epithelial_cell	chr8	22096543	22096544	-	22096543	11	11	11	0.458738	2.84535	22096288|22096275|22096274|22096345|22096340|22096282|22096272|22096277	chr8	22096244	22096542	AluSx3	-
airway_epithelial_cell	chr8	27167215	27167218	+	27167215	6	6	11	0.458738	2.64644	27167536|27167432|27167356|27167517|27167519|27167544|27167514	chr8	27167217	27167518	AluSz6	+
airway_epithelial_cell	chr8	82633754	82633761	+	82633760	16	16	38	1.58473	3.39666	82634071|82634116|82634068|82634107|82634115|82634129|82633950|82634130|82634113|82634070|82634117|82634065|82634069|82634067|82634106	chr8	82633757	82634069	AluSp	+
airway_epithelial_cell	chr8	96002256	96002257	-	96002256	11	11	11	0.458738	3.45943	96001878|96002001|96001880|96002155|96001894|96001879|96001973|96001942|96001929|96001996|96001927	chr8	96001989	96002257	AluJo	-
airway_epithelial_cell	chr9	102734000	102734038	+	102734017	3	5	12	0.500442	3.09579	102734481|102734472|102734482|102734479|102734484|102734476|102734483|102734406|102734478	chr9	102734020	102734286	AluJr	+
airway_epithelial_cell	chr9	107924662	107924663	-	107924662	17	17	17	0.708959	3.33717	107924461|107924393|107924464|107924458|107924463|107924459|107924457|107924520|107924388|107924452|107924391	chr9	107924378	107924663	AluSx	-
airway_epithelial_cell	chr9	114984264	114984331	-	114984291	5	5	18	0.750663	3.57243	114983821|114984021|114983586|114983894|114984022|114984023|114984020|114983878|114983946|114984018|114983645|114983953|114983892	chr9	114984179	114984381	FAM	-
airway_epithelial_cell	chr9	117083197	117083198	+	117083197	9	9	9	0.375331	2.9477	117083371|117083370|117083524|117083434|117083529|117083482|117083372|117083498	chr9	117083198	117083508	AluSz	+
airway_epithelial_cell	chr9	127208000	127208001	-	127208000	8	8	8	0.333628	2.75	127207695|127207699|127207692|127207705|127207702|127207703|127207697	chr9	127207705	127208001	AluSq2	-
airway_epithelial_cell	chr9	131534765	131534766	+	131534765	46	46	47	1.96006	4.23477	131534926|131535021|131534967|131535045|131535047|131535013|131534929|131534943|131535019|131535044|131535030|131535051|131534952|131535049|131534938|131535018|131534916|131535048|131535017|131535014|131535050|131535015|131535016|131535020|131534939	chr9	131534765	131535051	AluSx	+
airway_epithelial_cell	chr9	139695874	139695875	+	139695874	38	38	39	1.62644	4.2211	139696166|139696182|139696163|139696170|139696193|139696176|139696172|139696183|139696171|139696079|139696110|139696078|139696094|139696075|139696185|139696189|139696174|139696184|139696117|139696077|139696191|139696093|139696109	chr9	139695877	139696176	AluSz	+
airway_epithelial_cell	chr9	139956891	139956918	-	139956900	3	3	7	0.291924	2.52164	139956695|139956702|139956693|139956694|139956696|139956692	chr9	139956761	139956868	FLAM_C	-
airway_epithelial_cell	chr9	33076843	33076875	+	33076843	3	3	7	0.291924	2.52164	33077152|33077106|33077165|33077154|33077293|33077153	chr9	33076865	33077169	AluSp	+
airway_epithelial_cell	chr9	88130291	88130292	+	88130291	6	6	6	0.250221	2.58496	88130597|88130579|88130582|88130591|88130487|88130485	chr9	88130292	88130597	AluSx3	+
airway_epithelial_cell	chr9	95717534	95717535	+	95717534	31	31	31	1.29281	3.67115	95717776|95717783|95717785|95717718|95717781|95717774|95717769|95717780|95717777|95717707|95717738|95717775|95717784|95717787|95717788	chr9	95717534	95717725	AluSp	+
airway_epithelial_cell	chr9	99042336	99042351	-	99042336	10	10	15	0.625552	2.86625	99042050|99042055|99042010|99042007|99042018|99042012|99042024|99042059|99042009	chr9	99042058	99042350	AluY	-
airway_epithelial_cell	chrX	115412374	115412393	-	115412392	4	4	8	0.333628	2.52164	115412140|115412199|115412054|115412052|115412053|115412069	chrX	115412091	115412374	AluSg	-
airway_epithelial_cell	chrX	133751317	133751319	-	133751317	3	6	6	0.250221	2.58496	133751011|133751014|133751028|133751032|133751010|133751015	chrX	133750994	133751318	AluSz6	-
airway_epithelial_cell	chrX	23799871	23799872	+	23799871	9	9	9	0.375331	2.6416	23800080|23800076|23800081|23800088|23800083|23800075|23800084	chrX	23799871	23800030	FLAM_C	+
airway_epithelial_cell	chrX	2847553	2847554	+	2847553	9	9	10	0.417035	2.72548	2847863|2847882|2847884|2847861|2847891|2847867|2847729	chrX	2847553	2847866	AluSx	+
airway_epithelial_cell	chrX	41159709	41159710	+	41159709	24	24	24	1.00088	3.43872	41160031|41160035|41160034|41160036|41160042|41160019|41160039|41160026|41160038|41160027|41160025|41160028	chrX	41159710	41160019	AluSz	+
airway_epithelial_cell	chrX	48436150	48436341	+	48436211	8	9	89	3.71161	4.5599	48436591|48436617|48436656|48436642|48436655|48436626|48436501|48436389|48436634|48436585|48436618|48436666|48436640|48436470|48436504|48436502|48436374|48436641|48436606|48436659|48436469|48436622|48436613|48436544|48436499|48436587|48436503|48436632|48436638|48436541|48436586|48436505|48436500|48436523	chrX	48436270	48436480	AluSx	+
airway_epithelial_cell	chrX	49047264	49047265	-	49047264	10	10	10	0.417035	2.64644	49046984|49046786|49046986|49046990|49046985|49046972|49046978	chrX	49046935	49047271	AluJb	-
airway_epithelial_cell	chrX	70520491	70520493	-	70520491	4	7	7	0.291924	2.52164	70520319|70520282|70520363|70520287|70520352|70520316	chrX	70520369	70520464	AluSg7	-
airway_epithelial_cell	chrX	77083029	77083099	-	77083092	4	4	20	0.83407	3.3037	77082547|77082544|77082670|77082667|77082479|77082548|77082424|77082666|77082672|77082663|77082668|77082386	chrX	77082928	77083236	AluSg	-
body_of_pancreas_female_adult_51_years	chr10	112659317	112659374	+	112659373	15	15	32	3.06637	3.43004	112659477|112659595|112659687|112659470|112659596|112659882|112659597|112659505|112659480|112659688|112659497|112659594|112659568|112659503	chr10	112659273	112659569	AluSp	+
body_of_pancreas_female_adult_51_years	chr10	116051702	116051735	+	116051718	3	3	14	1.34154	3.03915	116052056|116051964|116052053|116052055|116051873|116051930|116052059|116052057|116051927	chr10	116051754	116052049	AluSq	+
body_of_pancreas_female_adult_51_years	chr10	118353073	118353162	+	118353126	28	36	58	5.5578	5.12474	118353441|118353444|118353472|118353627|118353776|118353278|118353683|118353269|118353473|118353272|118353642|118353336|118353475|118353218|118353538|118353404|118353445|118353391|118353397|118353480|118353483|118353266|118353500|118353549|118353482|118353270|118353528|118353393|118353322|118353477|118353394|118353529|118353474|118353476|118353504|118353277|118353395|118353891|118353268|118353437	chr10	118353185	118353496	AluSx1	+
body_of_pancreas_female_adult_51_years	chr10	118358582	118358633	+	118358582	4	4	11	1.05407	2.66353	118358802|118359027|118358870|118359316|118359038|118358864|118359393	chr10	118358484	118358812	AluSq2	+
body_of_pancreas_female_adult_51_years	chr10	118387644	118387666	+	118387646	4	6	11	1.05407	2.84535	118387958|118387868|118387897|118387866|118387904|118387867|118387902|118387903	chr10	118387604	118387914	AluJr	+
body_of_pancreas_female_adult_51_years	chr10	118388061	118388198	+	118388093	13	13	68	6.51605	4.88675	118388297|118388316|118388493|118388369|118388357|118388299|118388301|118388384|118388462|118388300|118388306|118388312|118388380|118388471|118388304|118388409|118388390|118388315|118388504|118388465|118388495|118388318|118388383|118388491|118388302|118388463|118388307|118388496|118388356|118388382|118388488|118388309|118388256|118388305|118388368|118388464|118388313	chr10	118387997	118388324	AluY	+
body_of_pancreas_female_adult_51_years	chr10	118407818	118407889	+	118407880	11	23	43	4.12044	4.00568	118408002|118408007|118408054|118408152|118408008|118408032|118408026|118408084|118408022|118408004|118408005|118408073|118408003|118408006|118408027|118408025|118408117|118408200|118408159	chr10	118407750	118408022	AluSx	+
body_of_pancreas_female_adult_51_years	chr10	13179131	13179198	+	13179131	20	21	48	4.59956	3.75391	13179298|13179319|13179291|13179289|13179299|13179311|13179295|13179296|13179310|13179306|13179309|13179293|13179294|13179283|13179305|13179301|13179297	chr10	13178997	13179298	AluSz	+
body_of_pancreas_female_adult_51_years	chr10	18466215	18466244	+	18466222	7	8	17	1.62901	3.01307	18466572|18466385|18466553|18466544|18466517|18466521|18466577|18466542|18466571	chr10	18466266	18466537	AluSx1	+
body_of_pancreas_female_adult_51_years	chr10	23412165	23412194	-	23412173	15	18	24	2.29978	3.2433	23411960|23411962|23411965|23411957|23411920|23411966|23411931|23411959|23411967|23411963|23411970	chr10	23411995	23412307	AluSg4	-
body_of_pancreas_female_adult_51_years	chr10	23437801	23437855	-	23437830	3	3	8	0.766594	3	23437603|23437496|23437605|23437498|23437495|23437554|23437617|23437492	chr10	23437509	23437810	AluSx	-
body_of_pancreas_female_adult_51_years	chr10	65129102	65129149	-	65129121	3	3	11	1.05407	3.12193	65128912|65128890|65128889|65128930|65128882|65128911|65128929|65128901|65128909	chr10	65128933	65129202	AluSz	-
body_of_pancreas_female_adult_51_years	chr10	70042929	70042990	-	70042929	2	2	8	0.766594	2.5	70042386|70042848|70042664|70042781|70042844|70042851	chr10	70042807	70042939	FLAM_C	-
body_of_pancreas_female_adult_51_years	chr10	70242627	70242644	-	70242643	6	6	11	1.05407	2.72193	70242395|70242396|70242467|70242488|70242491|70242389|70242487	chr10	70242483	70242593	FLAM_A	-
body_of_pancreas_female_adult_51_years	chr10	81936908	81936910	-	81936908	7	9	9	0.862418	2.6416	81936732|81936712|81936739|81936740|81936738|81936642|81936700	chr10	81936737	81937027	AluSx1	-
body_of_pancreas_female_adult_51_years	chr1	104119535	104119693	+	104119588	69	76	236	22.6145	5.56801	104120040|104119767|104119941|104119918|104119925|104120402|104119926|104120031|104120215|104120051|104119929|104120015|104119913|104120041|104120413|104120044|104120034|104119912|104120013|104120030|104119924|104120037|104120414|104120216|104120018|104120129|104120016|104120027|104119917|104119919|104120039|104119959|104120407|104120019|104122080|104120054|104119930|104120012|104119922|104122018…	chr1	104119575	104119848	AluJo	+
body_of_pancreas_female_adult_51_years	chr1	11088115	11088132	+	11088118	7	7	16	1.53319	2.5244	11088296|11088301|11088292|11088297|11088284|11088302|11088343	chr1	11087998	11088284	AluSq	+
body_of_pancreas_female_adult_51_years	chr11	111514595	111514602	+	111514595	4	4	7	0.670769	2.52164	111514717|111514776|111514800|111514718|111514724|111514829	chr11	111514555	111514729	AluJb	+
body_of_pancreas_female_adult_51_years	chr11	114055764	114055946	+	114055776	6	6	36	3.44967	4.47494	114056237|114056067|114056059|114056203|114056169|114056053|114056068|114056061|114056231|114056185|114056144|114056060|114056055|114056183|114056058|114056137|114056062|114056243|114056108|114056056|114056054|114056063|114056076|114056179|114056244	chr11	114055767	114055954	AluJb	+
body_of_pancreas_female_adult_51_years	chr11	117175843	117175854	-	117175843	7	7	14	1.34154	2.61058	117175601|117175591|117175606|117175418|117175479|117175599|117175604	chr11	117175677	117175849	AluSx1	-
body_of_pancreas_female_adult_51_years	chr11	13725369	13725407	+	13725406	9	9	14	1.34154	2.54952	13725734|13725482|13725658|13725603|13725792|13725673|13725779	chr11	13725308	13725611	AluSq2	+
body_of_pancreas_female_adult_51_years	chr11	27449874	27449887	-	27449886	5	8	14	1.34154	2.55666	27449417|27449612|27449571|27449632|27449416|27449637|27449609	chr11	27449683	27449985	AluSx1	-
body_of_pancreas_female_adult_51_years	chr11	27476721	27476843	-	27476842	7	7	44	4.21627	3.8227	27476590|27476589|27476591|27476659|27476665|27476588|27476585|27476592|27476582|27476593|27476664|27476581|27476598|27476584|27476600|27476586|27476594|27476587	chr11	27476590	27476773	AluJo	-
body_of_pancreas_female_adult_51_years	chr1	15492904	15492929	+	15492906	4	5	7	0.670769	2.52164	15493240|15493078|15493239|15493119|15493319|15493325	chr1	15492934	15493235	AluSx1	+
body_of_pancreas_female_adult_51_years	chr11	57533328	57533360	+	57533359	2	4	7	0.670769	2.80735	57533673|57533662|57533510|57533509|57533472|57533511|57533609	chr11	57533360	57533593	AluJb	+
body_of_pancreas_female_adult_51_years	chr11	57542604	57542692	+	57542679	19	19	65	6.22857	4.18316	57543116|57542883|57542816|57542818|57542830|57542820|57542832|57542846|57543114|57542834|57542815|57542835|57542890|57542871|57542880|57542817|57542874|57542831|57543054|57542823|57542812|57542829|57542872|57542833	chr11	57542694	57542818	FLAM_A	+
body_of_pancreas_female_adult_51_years	chr1	15765774	15765825	+	15765774	7	7	18	1.72484	3.9477	15766047|15765951|15766019|15766823|15766026|15766204|15765950|15765928|15765949|15766148|15766049|15765940|15766164|15766219|15765997|15766819	chr1	15765640	15765949	AluSq	+
body_of_pancreas_female_adult_51_years	chr1	15767482	15767495	+	15767491	6	7	18	1.72484	2.69866	15767742|15767765|15767789|15767745|15767773|15767740|15767809|15767687	chr1	15767393	15767698	AluSx1	+
body_of_pancreas_female_adult_51_years	chr1	15770544	15770564	+	15770544	23	23	30	2.87473	3.483	15771091|15770780|15770784|15770787|15770725|15771093|15770779|15770913|15770746|15770789|15770856|15770786|15770788	chr1	15770473	15770783	AluJr	+
body_of_pancreas_female_adult_51_years	chr1	15814628	15814686	+	15814628	4	4	10	0.958242	3.12193	15814859|15815028|15815278|15815031|15814871|15814858|15814932|15814856|15814969	chr1	15814599	15814890	AluJr	+
body_of_pancreas_female_adult_51_years	chr11	63338392	63338413	-	63338412	7	7	11	1.05407	2.91398	63338274|63338266|63338205|63338208|63338244|63338271|63338258|63338200	chr11	63338305	63338393	AluJr	-
body_of_pancreas_female_adult_51_years	chr1	164697289	164697342	+	164697289	2	2	8	0.766594	2.5	164697769|164697554|164697828|164697508|164697524|164697567	chr1	164697279	164697568	AluJr	+
body_of_pancreas_female_adult_51_years	chr11	65141396	65141409	-	65141396	4	4	7	0.670769	2.52164	65141170|65141146|65141180|65141175|65141168|65141169	chr11	65141063	65141358	AluJr	-
body_of_pancreas_female_adult_51_years	chr11	65206815	65206838	+	65206837	8	8	16	1.53319	2.95282	65207064|65207015|65207065|65207016|65207179|65207180|65207017|65207066|65207181	chr11	65206871	65207155	AluSz6	+
body_of_pancreas_female_adult_51_years	chr11	65208073	65208209	+	65208181	15	15	88	8.43253	4.43549	65208416|65208392|65208499|65208403|65208410|65208552|65208382|65208411|65208402|65208643|65208400|65208380|65208564|65208565|65208409|65208421|65208548|65208408|65208388|65208284|65208391|65208638|65208640|65208256|65208413|65208415|65208555|65208401|65208551|65208412|65208547|65208417	chr11	65208071	65208335	AluSx3	+
body_of_pancreas_female_adult_51_years	chr1	179844426	179844481	-	179844480	3	4	12	1.14989	3.02205	179844131|179844133|179844125|179844123|179844132|179844113|179844129|179844122|179844127	chr1	179844126	179844437	AluSx1	-
body_of_pancreas_female_adult_51_years	chr1	184761363	184761392	-	184761376	3	4	13	1.24571	2.71929	184761204|184761079|184760982|184761205|184761037|184760983|184761057	chr1	184761093	184761374	AluJo	-
body_of_pancreas_female_adult_51_years	chr1	186326344	186326403	-	186326362	5	5	16	1.53319	2.85846	186326137|186325963|186326220|186326139|186326141|186326144|186326217|186326219	chr1	186326183	186326477	AluJo	-
body_of_pancreas_female_adult_51_years	chr11	9313368	9313419	-	9313408	2	2	8	0.766594	2.5	9313196|9313197|9313195|9313251|9313248|9313145	chr11	9313251	9313552	AluSg7	-
body_of_pancreas_female_adult_51_years	chr11	96007336	96007395	-	96007394	2	2	9	0.862418	2.75	96007164|96007173|96007171|96007182|96007205|96007178|96007083	chr11	96007235	96007545	AluY	-
body_of_pancreas_female_adult_51_years	chr1	200032955	200032995	+	200032981	4	4	15	1.43736	3.50689	200033100|200033289|200033252|200033294|200033128|200033218|200033441|200033291|200033288|200033099|200033372|200033290	chr1	200033016	200033291	AluSx	+
body_of_pancreas_female_adult_51_years	chr1	200039513	200039535	+	200039515	12	17	22	2.10813	2.86974	200039872|200039876|200039882|200039695|200039884|200039880|200039663|200039677|200039827	chr1	200039536	200039822	AluJb	+
body_of_pancreas_female_adult_51_years	chr1	207942293	207942322	+	207942319	8	8	17	1.62901	2.66013	207942705|207942665|207942671|207942669|207942466|207942680|207942676	chr1	207942322	207942612	AluSg4	+
body_of_pancreas_female_adult_51_years	chr12	109684699	109684723	+	109684722	3	5	8	0.766594	2.52164	109684959|109685169|109684983|109684903|109684957|109684960	chr12	109684602	109684903	AluJr	+
body_of_pancreas_female_adult_51_years	chr12	120760688	120760710	-	120760709	2	2	6	0.574945	2.58496	120760333|120760382|120760353|120760379|120760512|120760385	chr12	120760383	120760688	AluSq2	-
body_of_pancreas_female_adult_51_years	chr12	120761269	120761302	-	120761269	3	3	8	0.766594	2.5	120761066|120761062|120761055|120761110|120761023|120761077	chr12	120761062	120761364	AluSz	-
body_of_pancreas_female_adult_51_years	chr12	125395984	125396076	-	125396063	4	5	19	1.82066	3.72548	125395822|125395823|125395750|125395847|125395828|125395813|125395824|125395820|125395834|125395723|125395836|125395733|125395821|125395962	chr12	125395818	125396023	AluSx1	-
body_of_pancreas_female_adult_51_years	chr12	21531824	21531826	+	21531825	5	8	8	0.766594	2.75	21532039|21532158|21532111|21532269|21532014|21532012|21532015	chr12	21531728	21532024	AluSg	+
body_of_pancreas_female_adult_51_years	chr1	22301625	22301629	+	22301628	7	10	14	1.34154	3.37878	22301988|22301972|22301958|22301964|22301753|22301965|22301851|22301918|22301743|22301850|22301852	chr1	22301615	22301860	AluSx	+
body_of_pancreas_female_adult_51_years	chr1	22306624	22306661	+	22306624	8	8	13	1.24571	3.2389	22306997|22307009|22307040|22307010|22307048|22306990|22306988|22306985|22307014|22306986	chr1	22306690	22306984	AluSq2	+
body_of_pancreas_female_adult_51_years	chr1	22308942	22308984	+	22308942	5	5	13	1.24571	2.87314	22309098|22309141|22310041|22309142|22309139|22309107|22309313|22309069	chr1	22308829	22309098	AluSz	+
body_of_pancreas_female_adult_51_years	chr1	22309600	22309640	+	22309621	4	6	13	1.24571	3.39275	22309932|22310048|22309740|22309928|22309942|22310046|22309931|22310058|22309937|22309771|22309933	chr1	22309560	22309866	AluSx	+
body_of_pancreas_female_adult_51_years	chr1	22309874	22309902	+	22309885	8	8	27	2.58725	3.82525	22310060|22310213|22310283|22310039|22310044|22310325|22310261|22310085|22310095|22310072|22310045|22310089|22310058|22310084|22310375|22310070	chr1	22309892	22310032	AluJo	+
body_of_pancreas_female_adult_51_years	chr1	22312694	22312728	+	22312703	7	8	17	1.62901	3.85217	22312921|22312851|22312854|22312855|22312899|22312849|22313531|22313125|22312902|22312848|22312960|22312841|22313124|22312981|22312896	chr1	22312584	22312900	AluSx1	+
body_of_pancreas_female_adult_51_years	chr1	22314779	22315030	+	22314925	21	21	128	12.2655	5.00839	22315005|22315527|22315008|22315143|22315163|22315314|22315307|22315387|22315504|22315529|22315393|22315028|22315004|22315160|22315141|22315734|22315396|22315148|22314974|22315145|22314940|22315147|22315006|22315054|22315058|22315056|22315162|22315200|22315131|22315053|22315055|22315530|22315142|22315009|22315166|22315144|22315067|22315007|22315146|22315059|22315505|22315154|22315102|22315027|223…	chr1	22314802	22315103	AluSg	+
body_of_pancreas_female_adult_51_years	chr1	22315198	22315338	+	22315198	18	18	52	4.98286	4.31074	22315394|22338484|22315444|22315569|22315396|22315528|22315445|22315570|22315476|22315395|22315504|22315571|22315530|22315541|22315574|22315573|22315505|22315566|22315527|22315296|22315622|22315567|22315572|22315357|22315525|22315526|22315446	chr1	22315103	22315396	AluY	+
body_of_pancreas_female_adult_51_years	chr1	22318301	22318388	+	22318329	12	14	51	4.88703	4.09634	22318651|22318622|22318648|22318620|22318647|22318505|22318624|22318646|22318507|22318548|22318463|22318535|22318626|22318645|22318623|22318536|22318478|22318707|22318643|22318467|22318625|22318621|22318705|22318515	chr1	22318330	22318626	AluSq2	+
body_of_pancreas_female_adult_51_years	chr1	22321202	22321221	+	22321208	4	4	10	0.958242	2.64644	22321399|22321465|22321430|22321468|22321351|22321389|22321307	chr1	22321210	22321518	AluJb	+
body_of_pancreas_female_adult_51_years	chr1	22326552	22326555	+	22326554	5	8	9	0.862418	2.5	22326749|22326891|22326843|22326679|22326672|22326889	chr1	22326541	22326786	AluSx	+
body_of_pancreas_female_adult_51_years	chr1	22331444	22331538	+	22331444	6	7	34	3.25802	4.17923	22331618|22331710|22331615|22331607|22331712|22331614|22331740|22331782|22331609|22331636|22331703|22331685|22331637|22331612|22332469|22331709|22331605|22331711|22331634|22331713	chr1	22331310	22331607	AluSq2	+
body_of_pancreas_female_adult_51_years	chr1	22332828	22332912	+	22332872	7	7	49	4.69539	4.0191	22333400|22333107|22333066|22333068|22332993|22333227|22333117|22333109|22333122|22333470|22333108|22333105|22333123|22333238|22333110|22333101|22333529|22333241|22333120|22333119|22333395|22333587	chr1	22332853	22333044	AluSx	+
body_of_pancreas_female_adult_51_years	chr1	22333100	22333136	+	22333135	5	5	11	1.05407	2.84535	22333745|22333470|22333392|22333461|22333265|22333459|22333462|22333393	chr1	22333070	22333209	AluJo	+
body_of_pancreas_female_adult_51_years	chr1	22335879	22335891	+	22335890	12	13	18	1.72484	3.2869	22336074|22336735|22336224|22336030|22336018|22336029|22335998|22336138|22336714|22336017|22336022|22336020	chr1	22335886	22336074	AluSx	+
body_of_pancreas_female_adult_51_years	chr1	236366501	236366561	-	236366541	7	7	15	1.43736	3.50689	236366380|236366338|236366322|236366118|236366287|236366119|236366320|236366194|236366355|236366379|236366346|236366366	chr1	236366367	236366676	AluY	-
body_of_pancreas_female_adult_51_years	chr1	236399439	236399447	-	236399446	11	11	18	1.72484	2.99662	236399229|236389630|236399231|236399337|236398977|236399232|236399233|236399227|236399334|236399230	chr1	236399232	236399526	AluSx1	-
body_of_pancreas_female_adult_51_years	chr1	236425786	236425865	-	236425863	8	9	27	2.58725	4.00434	236425656|236425655|236425651|236425647|236425665|236425644|236425652|236425640|236425646|236425650|236425683|236425641|236425638|236425676|236425666|236425658|236425659|236425645	chr1	236425701	236426004	AluSz	-
body_of_pancreas_female_adult_51_years	chr1	239567451	239567482	+	239567451	5	5	16	1.53319	3.05656	239567666|239567749|239567784|239567600|239567679|239567728|239567817|239567732|239567599	chr1	239567316	239567601	AluY	+
body_of_pancreas_female_adult_51_years	chr12	51325173	51325190	+	51325174	20	21	30	2.87473	3.74196	51325527|51325304|51325311|51325344|51325343|51325389|51325420|51325324|51325556|51325385|51325348|51325423|51325342|51325358|51325428|51325350	chr12	51325210	51325520	AluSq2	+
body_of_pancreas_female_adult_51_years	chr12	64267659	64267695	+	64267693	6	13	25	2.39561	4.1683	64267868|64267831|64267823|64267841|64267890|64267846|64267833|64267830|64267859|64267832|64267848|64267822|64267856|64267896|64267897|64267845|64267834|64267828|64267842	chr12	64267603	64267822	AluJb	+
body_of_pancreas_female_adult_51_years	chr13	41235733	41235754	-	41235733	12	12	14	1.34154	2.56545	41235356|41235346|41235354|41235387|41235385|41235598|41235386	chr13	41235411	41235733	AluSx1	-
body_of_pancreas_female_adult_51_years	chr13	50261107	50261156	-	50261124	5	5	12	1.14989	3.08496	50260582|50260898|50260899|50260881|50260784|50260801|50260896|50260894|50260892	chr13	50260941	50261230	AluJr	-
body_of_pancreas_female_adult_51_years	chr14	21706268	21706295	-	21706294	6	6	9	0.862418	2.9477	21705932|21706023|21706024|21705881|21706025|21705933|21705875|21705928	chr14	21705930	21706229	AluSp	-
body_of_pancreas_female_adult_51_years	chr14	21720672	21720704	-	21720703	5	5	9	0.862418	3	21720044|21720274|21720281|21720494|21720473|21720492|21720469|21720468	chr14	21720469	21720771	AluSz	-
body_of_pancreas_female_adult_51_years	chr14	31769581	31769618	-	31769617	4	5	7	0.670769	2.52164	31769409|31769360|31769412|31769437|31769411|31769433	chr14	31769483	31769601	AluSx	-
body_of_pancreas_female_adult_51_years	chr14	64063234	64063235	-	64063234	17	18	18	1.72484	3.0516	64063089|64062862|64062876|64062797|64062869|64062817|64062866|64062864|64062853|64062867	chr14	64062937	64063231	AluSq2	-
body_of_pancreas_female_adult_51_years	chr1	48662020	48662021	-	48662020	19	19	19	1.82066	2.86558	48661870|48661880|48661868|48661879|48661872|48661877|48661867|48661882|48661875	chr1	48661883	48662019	FLAM_C	-
body_of_pancreas_female_adult_51_years	chr14	89850181	89850267	-	89850211	4	4	16	1.53319	2.57782	89850095|89850014|89849995|89850035|89850024|89850037|89850038	chr14	89850122	89850300	AluSz6	-
body_of_pancreas_female_adult_51_years	chr14	92201365	92201379	-	92201365	9	9	12	1.14989	2.58496	92201047|92201050|92201078|92201041|92201051|92201049|92201046	chr14	92201075	92201365	AluSz6	-
body_of_pancreas_female_adult_51_years	chr15	23361366	23361367	-	23361366	6	6	6	0.574945	2.58496	23361029|23361025|23361026|23361023|23361027|23361028	chr15	23361009	23361317	AluSx1	-
body_of_pancreas_female_adult_51_years	chr15	60675654	60675693	-	60675682	3	3	8	0.766594	2.75	60675592|60675322|60674981|60675328|60675326|60674988|60675594	chr15	60675317	60675627	AluJb	-
body_of_pancreas_female_adult_51_years	chr15	75645125	75645164	+	75645125	5	5	10	0.958242	2.64644	75645576|75645581|75645579|75645585|75645567|75645575|75645587	chr15	75645198	75645505	AluSq2	+
body_of_pancreas_female_adult_51_years	chr15	80384501	80384530	+	80384502	6	13	17	1.62901	2.63129	80384664|80384686|80384661|80384682|80384685|80384684|80384683	chr15	80384548	80384788	AluSz6	+
body_of_pancreas_female_adult_51_years	chr15	83547667	83547686	-	83547685	11	11	23	2.20396	4.05596	83547385|83547413|83547254|83547360|83547343|83547349|83547344|83547348|83547252|83547347|83547426|83547357|83547367|83547350|83547257|83547355|83547251|83547362	chr15	83547388	83547672	AluJb	-
body_of_pancreas_female_adult_51_years	chr15	86245142	86245166	+	86245142	3	3	7	0.670769	2.80735	86245379|86245330|86245374|86245375|86245860|86245484|86245720	chr15	86245194	86245470	AluSx3	+
body_of_pancreas_female_adult_51_years	chr15	93159312	93159313	-	93159312	12	12	12	1.14989	2.9183	93158930|93158932|93159120|93159062|93159083|93158927|93159130|93159119|93159123	chr15	93159152	93159442	AluSq	-
body_of_pancreas_female_adult_51_years	chr1	61523585	61523586	-	61523585	17	17	17	1.62901	3.29277	61523243|61523349|61523298|61523439|61523345|61523312|61523448|61523292|61523297|61523342|61523463	chr1	61523296	61523586	AluSq2	-
body_of_pancreas_female_adult_51_years	chr1	61604568	61604578	+	61604577	3	5	7	0.670769	2.52164	61604867|61605109|61604874|61604717|61604873|61604716	chr1	61604579	61604868	AluSz6	+
body_of_pancreas_female_adult_51_years	chr16	20321807	20322598	-	20322242	1723	1779	6681	640.202	7.61855	20321018|20322160|20322279|20321951|20321750|20322262|20321769|20322161|20322196|20321659|20322431|20321647|20322037|20321926|20322432|20322142|20322068|20321862|20322164|20321861|20322497|20321972|20322371|20321853|20321939|20322308|20321916|20322163|20322176|20322311|20322309|20322489|20321700|20322172|20322268|20322004|20322210|20321764|20321968|20322065|20321896|20322173|20321940|20321898|203…	chr16	20322070	20322378	AluSx1	-
body_of_pancreas_female_adult_51_years	chr16	20332696	20332699	-	20332696	26	26	31	2.97055	4.25657	20332211|20332376|20332464|20332374|20332465|20332056|20332375|20332377|20332541|20332203|20332212|20332486|20332208|20332416|20332057|20332495|20332210|20332273|20332274|20332003|20332498	chr16	20332373	20332672	AluSz6	-
body_of_pancreas_female_adult_51_years	chr16	3084911	3084960	-	3084914	14	14	32	3.06637	4.05324	3084661|3084790|3084706|3084659|3084708|3084713|3084670|3084665|3084623|3084811|3084674|3084714|3084628|3084699|3084682|3084692|3084705|3084712|3084615	chr16	3084714	3085009	AluJb	-
body_of_pancreas_female_adult_51_years	chr16	4137978	4138096	-	4138050	3	3	21	2.01231	3.32734	4137915|4137839|4137860|4137855|4137910|4137857|4137861|4137849|4137826|4137906|4137850|4137917	chr16	4137927	4138076	AluJo	-
body_of_pancreas_female_adult_51_years	chr16	48387105	48387134	+	48387106	3	5	12	1.14989	2.9183	48387317|48387319|48387410|48387318|48387230|48387308|48387321|48387309|48387307	chr16	48387134	48387428	AluJb	+
body_of_pancreas_female_adult_51_years	chr16	75255742	75255963	+	75255755	16	16	132	12.6488	4.92719	75256000|75255978|75256122|75256043|75256511|75256029|75256121|75256117|75256221|75255979|75256032|75256228|75256074|75256036|75256116|75256067|75256118|75256128|75256081|75255999|75255871|75256076|75255980|75256057|75255901|75255977|75255959|75256002|75256027|75256042|75256213|75256001|75256070|75256125|75256119|75256033|75256303|75256218|75256114|75256073|75256041|75256075|75255976|75256071|752…	chr16	75255678	75255984	AluY	+
body_of_pancreas_female_adult_51_years	chr17	27729746	27729756	+	27729746	5	5	8	0.766594	2.5	27730028|27729952|27730027|27730030|27729961|27730029	chr17	27729772	27729905	AluSz	+
body_of_pancreas_female_adult_51_years	chr17	30707838	30707877	+	30707867	8	8	17	1.62901	3.0516	30707986|30707994|30707991|30708059|30708011|30707984|30708056|30708010|30707985|30707988	chr17	30707738	30708000	AluSx	+
body_of_pancreas_female_adult_51_years	chr17	30908728	30908782	-	30908728	2	2	8	0.766594	2.52164	30908577|30908593|30908557|30908572|30908477|30908478	chr17	30908597	30908759	AluJb	-
body_of_pancreas_female_adult_51_years	chr17	40555223	40555292	-	40555223	3	3	14	1.34154	3.37878	40555087|40554816|40555117|40555129|40554973|40554817|40554508|40554972|40554974|40554916|40555127	chr17	40555091	40555246	AluJr	-
body_of_pancreas_female_adult_51_years	chr17	41381658	41381687	+	41381682	3	3	7	0.670769	2.80735	41381948|41381911|41381880|41381941|41381946|41381903|41382189	chr17	41381640	41381781	AluJb	+
body_of_pancreas_female_adult_51_years	chr17	41399852	41399940	+	41399854	4	6	21	2.01231	3.23935	41400374|41400563|41400394|41400064|41400530|41400112|41400566|41399966|41400354|41400277|41400688|41400503|41400245	chr17	41399881	41400191	AluSp	+
body_of_pancreas_female_adult_51_years	chr17	48741568	48741602	+	48741568	2	2	7	0.670769	2.52164	48741749|48741754|48741742|48741743|48741753|48741747	chr17	48741556	48741729	FAM	+
body_of_pancreas_female_adult_51_years	chr17	66120011	66120027	+	66120017	5	5	10	0.958242	2.64644	66120143|66120155|66120178|66120161|66120162|66120169|66120190	chr17	66119953	66120168	AluJr4	+
body_of_pancreas_female_adult_51_years	chr1	8080670	8080769	-	8080768	8	9	34	3.25802	2.92234	8080518|8080545|8080289|8080536|8080519|8080546|8080538|8080576|8080574|8080548|8080541	chr1	8080612	8080904	AluSp	-
body_of_pancreas_female_adult_51_years	chr1	8083584	8083647	-	8083611	8	8	20	1.91648	3.58418	8083289|8083410|8083283|8083292|8083288|8083295|8083497|8083286|8083282|8083419|8083287|8083111|8083285|8083496	chr1	8083333	8083638	AluJb	-
body_of_pancreas_female_adult_51_years	chr1	8460610	8460644	-	8460643	4	5	10	0.958242	2.92193	8460284|8460302|8460304|8460295|8460309|8460282|8460279|8460281	chr1	8460333	8460611	AluJr	-
body_of_pancreas_female_adult_51_years	chr18	55738427	55738428	+	55738427	6	7	7	0.670769	2.58496	55738810|55738669|55738559|55738572|55738811|55738560	chr18	55738428	55738557	AluJo	+
body_of_pancreas_female_adult_51_years	chr19	10834497	10834535	+	10834497	5	6	16	1.53319	3.15564	10834773|10834801|10834807|10834785|10834795|10834774|10834813|10834771|10834832|10834798	chr19	10834498	10834774	AluJo	+
body_of_pancreas_female_adult_51_years	chr19	7255726	7255761	-	7255744	5	5	15	1.43736	2.75343	7255573|7255572|7255590|7255453|7255351|7255508|7255513|7255582	chr19	7255582	7255889	AluJr	-
body_of_pancreas_female_adult_51_years	chr20	17599877	17599894	-	17599877	11	11	14	1.34154	2.84237	17599649|17599652|17599646|17599736|17599591|17599629|17599716|17599651	chr20	17599606	17599863	AluJr	-
body_of_pancreas_female_adult_51_years	chr20	34314981	34314995	-	34314981	5	6	8	0.766594	2.75	34314721|34314692|34314883|34314898|34314716|34314723|34314895	chr20	34314752	34314983	AluSx	-
body_of_pancreas_female_adult_51_years	chr20	35518983	35519132	-	35519045	19	19	85	8.14506	4.32702	35518799|35518805|35518816|35518817|35518820|35518807|35518856|35518842|35518872|35518812|35518809|35518833|35518868|35518858|35518731|35518864|35518828|35518972|35518687|35518826|35518686|35518804|35518870|35518847|35518813|35518836|35518859|35518862|35518834|35518843|35518863|35518849|35518810|35518835|35518838|35518865|35518867	chr20	35518867	35519179	AluSq2	-
body_of_pancreas_female_adult_51_years	chr20	35861332	35861333	+	35861332	7	7	7	0.670769	2.52164	35861857|35861508|35861522|35861489|35861636|35861488	chr20	35861335	35861628	AluJr	+
body_of_pancreas_female_adult_51_years	chr20	43939043	43939063	+	43939043	3	3	7	0.670769	2.58496	43939370|43939345|43939366|43939320|43939331|43939258	chr20	43938964	43939256	AluSx1	+
body_of_pancreas_female_adult_51_years	chr20	43941388	43941470	+	43941426	10	10	53	5.07868	4.4121	43941540|43941589|43941691|43941543|43941694|43941573|43941688|43941909|43941539|43941541|43941814|43941537|43941590|43941957|43941571|43941531|43941693|43941880|43941868|43941583|43941692|43941708|43941574|43942007|43941509	chr20	43941351	43941664	AluJb	+
body_of_pancreas_female_adult_51_years	chr20	43943482	43943520	+	43943513	2	2	8	0.766594	2.5	43943797|43943793|43943778|43943755|43943782|43944016	chr20	43943441	43943743	AluSq2	+
body_of_pancreas_female_adult_51_years	chr20	43944194	43944238	+	43944194	23	23	56	5.36616	4.41202	43944402|43944452|43944487|43944530|43944484|43944405|43944602|43944392|43944505|43944463|43944444|43944400|43944550|43944490|43944486|43944494|43944391|43944491|43944378|43944446|43944393|43944435|43944394|43944555|43944506|43944492	chr20	43944099	43944401	AluSx3	+
body_of_pancreas_female_adult_51_years	chr2	134885632	134885675	+	134885654	9	9	32	3.06637	2.97591	134885835|134885870|134885839|134885853|134885836|134885862|134885868|134885841|134885852|134885851	chr2	134885657	134885791	FLAM_C	+
body_of_pancreas_female_adult_51_years	chr21	46189420	46189461	-	46189459	8	9	23	2.20396	3.51603	46189122|46189292|46189287|46189104|46189208|46189259|46189254|46189124|46189263|46189257|46189250|46188979|46189258	chr21	46189293	46189592	AluY	-
body_of_pancreas_female_adult_51_years	chr2	165563851	165563885	-	165563858	3	3	7	0.670769	2.80735	165563737|165563522|165563630|165563111|165563629|165563547|165563548	chr2	165563660	165563950	AluSz	-
body_of_pancreas_female_adult_51_years	chr22	26921399	26921418	-	26921399	5	5	11	1.05407	3.12193	26921192|26921303|26921235|26921010|26921208|26921190|26921229|26921185|26920973	chr22	26921190	26921479	AluSx	-
body_of_pancreas_female_adult_51_years	chr2	233638695	233638697	+	233638696	7	10	11	1.05407	2.72193	233638852|233638942|233638872|233638851|233638854|233638842|233638847	chr2	233638711	233638842	FLAM_C	+
body_of_pancreas_female_adult_51_years	chr22	42234494	42234534	+	42234502	3	3	8	0.766594	2.5	42234778|42234747|42234771|42234780|42234782|42234775	chr22	42234454	42234764	AluSx1	+
body_of_pancreas_female_adult_51_years	chr2	32541004	32541018	+	32541004	7	7	9	0.862418	2.72548	32541140|32541107|32541247|32541362|32541165|32541113|32541108	chr2	32540966	32541103	FLAM_C	+
body_of_pancreas_female_adult_51_years	chr2	37330627	37330643	-	37330639	4	7	11	1.05407	3.27761	37330465|37330350|37330463|37330349|37330464|37330455|37330197|37330460|37330503|37330458	chr2	37330333	37330638	AluSq2	-
body_of_pancreas_female_adult_51_years	chr2	45943518	45943557	+	45943518	2	2	11	1.05407	2.84535	45943735|45943795|45943737|45943798|45943727|45943712|45943705|45943872	chr2	45943373	45943687	AluSz	+
body_of_pancreas_female_adult_51_years	chr2	53098218	53098264	-	53098249	3	3	9	0.862418	2.9477	53097941|53097922|53097873|53097877|53097872|53097939|53097733|53097902	chr2	53097916	53098223	AluSg	-
body_of_pancreas_female_adult_51_years	chr2	53211938	53211989	-	53211952	1	1	7	0.670769	2.58496	53211771|53211606|53211634|53211619|53211817|53211611	chr2	53211770	53212068	AluSz6	-
body_of_pancreas_female_adult_51_years	chr2	53214386	53214427	-	53214426	7	7	20	1.91648	2.87095	53214261|53214165|53214210|53214212|53214209|53214171|53214279|53214166|53214207	chr2	53214250	53214527	AluSx	-
body_of_pancreas_female_adult_51_years	chr2	53324931	53324947	-	53324946	3	3	6	0.574945	2.58496	53324634|53324642|53324644|53324639|53324640|53324643	chr2	53324759	53325075	AluY	-
body_of_pancreas_female_adult_51_years	chr2	53337525	53337556	-	53337525	10	10	17	1.62901	3.14629	53337212|53337220|53337228|53337278|53336439|53337288|53337226|53337229|53337225|53337227	chr2	53337370	53337519	AluSx	-
body_of_pancreas_female_adult_51_years	chr2	53355443	53355459	-	53355450	4	5	12	1.14989	2.52205	53355078|53354962|53355210|53355080|53355310|53355146|53355144	chr2	53355291	53355410	AluSx	-
body_of_pancreas_female_adult_51_years	chr2	65326079	65326146	-	65326124	7	7	16	1.53319	2.86625	65326013|65325901|65325912|65325898|65325821|65325795|65325824|65325900|65325897	chr2	65325967	65326270	AluSz6	-
body_of_pancreas_female_adult_51_years	chr2	69975321	69975390	+	69975363	13	13	48	4.59956	3.49584	69975542|69975543|69975572|69975531|69975533|69975571|69975573|69975534|69975537|69975738|69975536|69975545|69975546|69975569	chr2	69975226	69975533	AluY	+
body_of_pancreas_female_adult_51_years	chr2	69978327	69978355	+	69978327	6	6	10	0.958242	2.92193	69978659|69979055|69978580|69978485|69978670|69979057|69978723|69978674	chr2	69978375	69978660	AluSx	+
body_of_pancreas_female_adult_51_years	chr2	88923634	88923674	-	88923673	6	6	11	1.05407	3.09579	88923506|88923502|88923511|88923146|88923062|88923505|88923496|88923323|88923324	chr2	88923504	88923809	AluSq	-
body_of_pancreas_female_adult_51_years	chr3	111838045	111838075	+	111838074	8	8	13	1.24571	2.87314	111838253|111838262|111838252|111838261|111838259|111838260|111838258|111838257	chr3	111837949	111838247	AluSq2	+
body_of_pancreas_female_adult_51_years	chr3	114196890	114197033	-	114196991	6	6	35	3.35385	3.64357	114196714|114196737|114196792|114196698|114196718|114196721|114196688|114196790|114196733|114196736|114196717|114196726|114196742|114196728|114196805|114196739	chr3	114196828	114197112	AluSp	-
body_of_pancreas_female_adult_51_years	chr3	124960278	124960312	-	124960290	5	5	14	1.34154	2.75343	124960093|124960100|124960162|124960090|124960099|124960148|124960094|124960092	chr3	124960161	124960274	FLAM_A	-
body_of_pancreas_female_adult_51_years	chr3	141878809	141878855	-	141878853	15	16	36	3.44967	3.46759	141878689|141878691|141878698|141878673|141774800|141878638|141878669|141878696|141878678|141878671|141878693|141878695|141878676|141878636|141878670|141878685|141878683	chr3	141878696	141878989	AluSx	-
body_of_pancreas_female_adult_51_years	chr3	148568787	148568839	+	148568824	23	43	79	7.57011	5.46993	148568980|148569136|148569182|148569013|148569209|148569043|148569039|148569148|148569401|148569188|148569211|148569106|148568984|148569359|148568971|148569055|148569059|148569152|148569056|148569101|148569134|148568981|148569356|148569525|148569057|148569285|148569243|148569139|148569207|148569048|148569185|148569181|148569058|148569403|148569104|148569165|148569284|148569173|148569175|148569172…	chr3	148568838	148569147	AluSx3	+
body_of_pancreas_female_adult_51_years	chr3	148576173	148576216	+	148576211	6	6	18	1.72484	3.46132	148576334|148576397|148576413|148576411|148576336|148576407|148576342|148576393|148576412|148576410|148576403|148576385	chr3	148576078	148576370	AluSx3	+
body_of_pancreas_female_adult_51_years	chr3	156259462	156259513	-	156259462	9	9	18	1.72484	3.14967	156259150|156259072|156259170|156259168|156259169|156259396|156259006|156259073|156259244|156259208|156259292	chr3	156259206	156259414	AluSx1	-
body_of_pancreas_female_adult_51_years	chr3	169310967	169310996	-	169310978	5	5	9	0.862418	2.5	169310785|169310789|169310572|169310272|169310576|169310790	chr3	169310862	169310977	FLAM_A	-
body_of_pancreas_female_adult_51_years	chr3	179571724	179571764	-	179571763	5	5	14	1.34154	3.23593	179571558|179571592|179571560|179571602|179571575|179571601|179571597|179571596|179571578|179571587	chr3	179571587	179571932	AluJb	-
body_of_pancreas_female_adult_51_years	chr3	183916687	183916688	+	183916687	6	6	6	0.574945	2.58496	183916779|183916827|183916851|183916938|183916936|183916945	chr3	183916689	183916984	AluJb	+
body_of_pancreas_female_adult_51_years	chr3	185106133	185106156	+	185106155	3	3	8	0.766594	2.5	185106335|185106382|185106333|185106318|185106337|185106340	chr3	185106007	185106314	AluJb	+
body_of_pancreas_female_adult_51_years	chr3	52289156	52289217	-	52289156	3	3	11	1.05407	2.64644	52289005|52288878|52288899|52288851|52288879|52288875|52289072	chr3	52288956	52289257	AluSp	-
body_of_pancreas_female_adult_51_years	chr3	9498512	9498585	+	9498525	4	4	11	1.05407	3.27761	9498672|9498789|9498677|9498684|9498713|9498676|9498664|9498787|9498786|9498693	chr3	9498376	9498679	AluSc	+
body_of_pancreas_female_adult_51_years	chr4	103731673	103731709	-	103731697	5	5	9	0.862418	2.50326	103731508|103731424|103731428|103731379|103731518|103731528	chr4	103731572	103731775	AluY	-
body_of_pancreas_female_adult_51_years	chr4	39551195	39551209	-	39551195	15	16	19	1.82066	2.58206	39550895|39550904|39551063|39551065|39550994|39551066|39551029|39551067	chr4	39550912	39551192	AluSz	-
body_of_pancreas_female_adult_51_years	chr4	72124720	72124732	+	72124720	2	2	6	0.574945	2.58496	72124870|72124925|72124888|72124919|72124910|72124922	chr4	72124703	72124864	FAM	+
body_of_pancreas_female_adult_51_years	chr4	772446	772494	-	772464	4	4	16	1.53319	3.5	772257|772302|772250|772249|772319|772258|772165|772323|772255|772325|772326|772301	chr4	772387	772484	AluSx	-
body_of_pancreas_female_adult_51_years	chr4	773019	773038	-	773021	4	5	7	0.670769	2.52164	772820|772866|772926|772865|772879|772852	chr4	772730	773030	AluSq2	-
body_of_pancreas_female_adult_51_years	chr4	774272	774339	-	774294	8	8	18	1.72484	2.7719	773831|774041|773879|774104|773874|774097|774082|773930	chr4	773975	774277	AluSp	-
body_of_pancreas_female_adult_51_years	chr4	89893612	89893627	-	89893616	4	5	8	0.766594	2.52164	89893324|89893455|89893286|89893322|89893456|89893454	chr4	89893450	89893751	AluSz	-
body_of_pancreas_female_adult_51_years	chr5	140780625	140780646	+	140780625	4	4	8	0.766594	2.5	140780906|140780961|140780804|140780911|140780918|140780967	chr5	140780628	140780917	AluSq2	+
body_of_pancreas_female_adult_51_years	chr5	140930351	140930385	-	140930351	6	6	13	1.24571	2.85539	140930186|140930172|140930140|140930142|140930185|140930265|140930178|140930180	chr5	140930178	140930342	AluSx4	-
body_of_pancreas_female_adult_51_years	chr5	154096485	154096486	+	154096485	10	10	10	0.958242	2.64644	154096638|154096647|154096648|154096637|154096646|154096645|154096649	chr5	154096337	154096648	AluJb	+
body_of_pancreas_female_adult_51_years	chr5	180258568	180258628	-	180258611	14	16	46	4.40791	3.91049	180258418|180258127|180257910|180258413|180258405|180257950|180258003|180258415|180258387|180258414|180258411|180258412|180258403|180258416|180258410|180258315|180258016|180258417|180258419|180257951	chr5	180258415	180258530	AluSq2	-
body_of_pancreas_female_adult_51_years	chr5	36228667	36228723	-	36228682	3	3	11	1.05407	2.72193	36228526|36228517|36228546|36228520|36228498|36228516|36228583	chr5	36228534	36228666	FLAM_A	-
body_of_pancreas_female_adult_51_years	chr5	40825971	40825972	-	40825971	6	6	6	0.574945	2.58496	40825815|40825799|40825725|40825620|40825760|40825654	chr5	40825815	40826110	AluSx	-
body_of_pancreas_female_adult_51_years	chr5	40827967	40828061	-	40828005	5	5	19	1.82066	3.82687	40827869|40827837|40827829|40827842|40827826|40827877|40827838|40827305|40827885|40827878|40827667|40827836|40827835|40827669|40827834	chr5	40827834	40827996	AluSx	-
body_of_pancreas_female_adult_51_years	chr5	43381761	43381797	-	43381796	9	9	17	1.62901	3.61687	43381670|43381664|43381627|43381566|43381451|43381629|43381620|43381561|43381624|43381560|43381625|43381623|43381626	chr5	43381493	43381761	AluJr	-
body_of_pancreas_female_adult_51_years	chr5	73015037	73015061	+	73015050	4	4	10	0.958242	2.64644	73015252|73015250|73015249|73015255|73015253|73015416|73015254	chr5	73015057	73015254	AluY	+
body_of_pancreas_female_adult_51_years	chr6	111022127	111022128	+	111022127	7	7	7	0.670769	2.52164	111022438|111022796|111022443|111022295|111022350|111022386	chr6	111022127	111022414	AluSg4	+
body_of_pancreas_female_adult_51_years	chr6	111420907	111420942	+	111420937	5	5	9	0.862418	2.50326	111421256|111421365|111421270|111421268|111421363|111421258	chr6	111420943	111421242	AluJb	+
body_of_pancreas_female_adult_51_years	chr6	122765238	122765381	-	122765304	12	13	50	4.79121	3.81088	122765139|122765137|122764987|122765122|122765119|122765124|122765142|122765136|122764985|122765140|122765135|122765115|122765120|122765123|122765039|122765181|122765158|122765141|122765040|122765138|122764981	chr6	122765165	122765430	AluJb	-
body_of_pancreas_female_adult_51_years	chr6	2334607	2334608	+	2334607	7	7	8	0.766594	2.52164	2334875|2334842|2334811|2334815|2334989|2334841	chr6	2334622	2334808	AluJb	+
body_of_pancreas_female_adult_51_years	chr6	30460848	30460887	+	30460884	2	2	9	0.862418	2.72548	30461144|30461097|30461145|30461013|30461147|30461008|30461141	chr6	30460788	30461101	AluSc8	+
body_of_pancreas_female_adult_51_years	chr6	35622565	35622606	-	35622576	5	7	14	1.34154	3.03915	35622341|35622340|35622296|35622275|35622342|35622277|35622338|35622272|35622339	chr6	35622392	35622579	AluSp	-
body_of_pancreas_female_adult_51_years	chr6	42856885	42856896	+	42856885	4	4	7	0.670769	2.52164	42857030|42857103|42857102|42857194|42857195|42857187	chr6	42856896	42857198	AluSp	+
body_of_pancreas_female_adult_51_years	chr7	110866311	110866389	-	110866388	3	3	19	1.82066	3.46132	110866006|110866165|110866182|110865997|110866175|110865991|110865996|110866001|110866191|110866177|110866178|110865995	chr7	110866206	110866522	AluJb	-
body_of_pancreas_female_adult_51_years	chr7	117139618	117139724	+	117139658	8	9	22	2.10813	3.4037	117139857|117139982|117139890|117139856|117139964|117139853|117139865|117139983|117140196|117140279|117139870|117140193|117140195	chr7	117139724	117139859	AluJb	+
body_of_pancreas_female_adult_51_years	chr7	117152494	117152532	+	117152495	12	16	33	3.1622	3.35091	117152892|117152775|117152771|117153343|117153342|117152854|117152770|117152781|117153377|117152612|117152758|117152774|117152777	chr7	117152401	117152708	AluSg	+
body_of_pancreas_female_adult_51_years	chr7	128299537	128299607	+	128299554	8	12	24	2.29978	3.969	128299818|128299983|128299846|128299845|128299830|128299843|128300000|128299823|128299836|128299822|128299827|128300045|128299825|128299862|128299844|128299998|128299837	chr7	128299507	128299780	AluJb	+
body_of_pancreas_female_adult_51_years	chr7	129924603	129924659	+	129924605	10	15	31	2.97055	4.63162	129925091|129924915|129925004|129924938|129924814|129925111|129924944|129924800|129924937|129925073|129924913|129924813|129924947|129925006|129924815|129924908|129925030|129924796|129924807|129925099|129924912|129924812|129924811|129924948|129924817|129925032	chr7	129924507	129924812	AluYf4	+
body_of_pancreas_female_adult_51_years	chr7	130026055	130026122	+	130026067	4	5	20	1.91648	4.02193	130026407|130026266|130026666|130026263|130026265|130026225|130026216|130026585|130026530|130026226|130026351|130026406|130026396|130026422|130026303|130026272|130026601	chr7	130026091	130026391	AluSc8	+
body_of_pancreas_female_adult_51_years	chr7	29505652	29505699	+	29505683	4	4	12	1.14989	2.66353	29505862|29505815|29505865|29505852|29505828|29505830|29505848	chr7	29505537	29505829	AluSz	+
body_of_pancreas_female_adult_51_years	chr7	35672840	35672841	-	35672840	7	7	8	0.766594	2.52164	35672511|35672571|35672517|35672434|35672639|35672716	chr7	35672678	35672978	AluSz	-
body_of_pancreas_female_adult_51_years	chr7	73154036	73154051	-	73154044	14	17	33	3.1622	4.39032	73153799|73153814|73153919|73153829|73153836|73153822|73153560|73153925|73153915|73153541|73153842|73153493|73153563|73153847|73153823|73153798|73153470|73153816|73153555|73153920|73153565|73153497|73153815	chr7	73153925	73154059	AluJr	-
body_of_pancreas_female_adult_51_years	chr7	99273432	99273471	-	99273470	8	8	16	1.53319	3.28064	99273329|99273305|99273319|99273339|99273326|99273325|99273322|99273337|99273321|99273330|99273320	chr7	99273323	99273617	AluJo	-
body_of_pancreas_female_adult_51_years	chr7	99634186	99634220	+	99634203	3	3	10	0.958242	2.52193	99634416|99634389|99634395|99634353|99634392|99634386	chr7	99634057	99634364	AluSx1	+
body_of_pancreas_female_adult_51_years	chr7	99635466	99635507	+	99635494	5	5	10	0.958242	3.32193	99635653|99635656|99635675|99635655|99635654|99635658|99635657|99635661|99635659|99635708	chr7	99635358	99635654	AluSx3	+
body_of_pancreas_female_adult_51_years	chr8	101729035	101729057	-	101729035	2	3	6	0.574945	2.58496	101728837|101728824|101728771|101728815|101728772|101728739	chr8	101728920	101729056	FAM	-
body_of_pancreas_female_adult_51_years	chr8	17411124	17411142	+	17411124	6	6	8	0.766594	2.5	17411294|17411302|17411296|17411463|17411280|17411304	chr8	17410997	17411298	AluJr	+
body_of_pancreas_female_adult_51_years	chr8	37613374	37613390	+	37613374	6	6	9	0.862418	2.72548	37613513|37613644|37613508|37613507|37613530|37613831|37613541	chr8	37613425	37613716	AluSx1	+
body_of_pancreas_female_adult_51_years	chr8	48391638	48391639	+	48391638	6	6	6	0.574945	2.58496	48391923|48391929|48391928|48391921|48391924|48391925	chr8	48391640	48391946	AluSx1	+
body_of_pancreas_female_adult_51_years	chr8	95951816	95951859	-	95951858	7	7	14	1.34154	2.75343	95951599|95951593|95951602|95951590|95951601|95951589|95951591|95951499	chr8	95951631	95951925	AluSx3	-
body_of_pancreas_female_adult_51_years	chr9	132590233	132590254	-	132590244	5	5	11	1.05407	2.72193	132590001|132589908|132590019|132590008|132589909|132589911|132590002	chr9	132590056	132590371	AluSp	-
body_of_pancreas_female_adult_51_years	chr9	135941061	135941086	+	135941085	27	29	32	3.06637	4.37355	135941456|135941465|135941521|135941662|135941330|135941531|135941326|135941327|135941433|135941328|135941434|135941324|135941445|135941325|135941529|135941412|135941527|135941453|135941519|135941391|135941533|135941468|135941500	chr9	135940951	135941256	AluSp	+
body_of_pancreas_female_adult_51_years	chr9	135947649	135947790	+	135947787	18	19	86	8.24088	3.90508	135947908|135947870|135947905|135947904|135947903|135947813|135947812|135947912|135947883|135947911|135947856|135947851|135947819|135947840|135947907|135947825|135947827|135947945|135947913|135947895|135947845|135947910|135947821|135947906|135947909	chr9	135947651	135947936	AluSz	+
body_of_pancreas_female_adult_51_years	chr9	14248571	14248616	-	14248571	2	2	8	0.766594	2.80735	14248227|14248244|14248245|14248343|14248225|14248344|14248267	chr9	14248344	14248569	AluJr	-
body_of_pancreas_female_adult_51_years	chr9	35030529	35030572	-	35030571	2	3	8	0.766594	2.75	35030340|35030346|35030336|35030352|35030339|35030351|35030337	chr9	35030374	35030568	AluJr	-
body_of_pancreas_female_adult_51_years	chr9	99131205	99131211	-	99131205	4	4	7	0.670769	2.52164	99131018|99131028|99131020|99131030|99131035|99131027	chr9	99131062	99131345	AluSz	-
body_of_pancreas_female_adult_51_years	chrX	105418756	105418783	+	105418756	3	3	9	0.862418	2.50326	105419112|105418895|105419092|105419090|105419110|105419129	chrX	105418757	105419059	AluSx	+
body_of_pancreas_female_adult_51_years	chrX	119116384	119116421	-	119116420	2	3	11	1.05407	3.32193	119116280|119116264|119116260|119116271|119116318|119116227|119116244|119116322|119116231|119116266	chrX	119116364	119116425	AluSz6	-
body_of_pancreas_female_adult_51_years	chrX	153276663	153276708	-	153276699	9	9	16	1.53319	3.625	153276449|153276362|153276533|153276452|153276453|153276201|153276500|153276206|153276553|153276527|153276202|153276543|153276534	chrX	153276542	153276840	AluJb	-
body_of_pancreas_female_adult_51_years	chrX	2824394	2824397	-	2824394	10	10	13	1.24571	3.02699	2824210|2824211|2824119|2824206|2824214|2824272|2824207|2824208|2824216	chrX	2824177	2824481	AluJb	-
body_of_pancreas_female_adult_51_years	chrX	48436321	48436394	+	48436321	13	14	39	3.73714	2.6663	48436642|48436502|48436653|48436473|48436641|48436505|48436503|48436631|48436644|48436501	chrX	48436270	48436480	AluSx	+
body_of_pancreas_female_adult_51_years	chrX	54589022	54589120	+	54589051	25	31	79	7.57011	4.10659	54589299|54589247|54589253|54589278|54589242|54589264|54589240|54589275|54589238|54589236|54589241|54589234|54589244|54589245|54589265|54589246|54589248|54589239|54589235|54589250|54589249|54589251|54589276	chrX	54589076	54589242	AluSx	+
body_of_pancreas_female_adult_51_years	chrX	77083260	77083261	-	77083260	9	9	9	0.862418	2.9477	77082946|77083060|77083062|77083138|77083061|77082947|77083131|77083063	chrX	77082928	77083236	AluSg	-
body_of_pancreas_female_adult_51_years	chrX	77083756	77083786	-	77083756	4	4	13	1.24571	2.85539	77083343|77083192|77083572|77083571|77083379|77083325|77083531|77083600	chrX	77083485	77083738	AluSz6	-
body_of_pancreas_female_adult_53_years	chr10	112639208	112639370	+	112639253	10	10	62	4.76004	3.64781	112639812|112639815|112639707|112639474|112639479|112639529|112639810|112639473|112639811|112639703|112639717|112639706|112639533|112639532|112639477|112639475|112639638|112639476|112639704	chr10	112639142	112639428	AluY	+
body_of_pancreas_female_adult_53_years	chr10	112648839	112648899	+	112648856	4	4	19	1.45872	3.12799	112649288|112649290|112649285|112649293|112649292|112649124|112649307|112649545|112649231|112649289	chr10	112648732	112649003	AluSx4	+
body_of_pancreas_female_adult_53_years	chr10	112659323	112659374	+	112659339	7	11	44	3.37809	3.81996	112659630|112659597|112659478|112659600|112659636|112659689|112659599|112659595|112659688|112659598|112659686|112659596|112659634|112659508|112659605|112659687|112659628	chr10	112659273	112659569	AluSp	+
body_of_pancreas_female_adult_53_years	chr10	112666961	112667001	+	112667000	3	3	7	0.537424	2.52164	112667283|112667088|112667381|112667298|112667307|112667308	chr10	112666990	112667298	AluJb	+
body_of_pancreas_female_adult_53_years	chr10	118387644	118387652	+	118387646	12	16	18	1.38195	3.0805	118387896|118387998|118387924|118387897|118387895|118387949|118387944|118387951|118387920|118387932	chr10	118387604	118387914	AluJr	+
body_of_pancreas_female_adult_53_years	chr10	118388130	118388193	+	118388131	7	8	24	1.8426	3.80351	118388381|118388498|118388502|118388462|118388367|118388500|118388467|118388493|118388389|118388463|118388504|118388465|118388409|118388455|118388410|118388346	chr10	118387997	118388324	AluY	+
body_of_pancreas_female_adult_53_years	chr10	118391215	118391217	+	118391215	5	7	8	0.614199	2.52164	118391681|118391607|118391853|118391852|118391396|118391854	chr10	118391084	118391362	AluSz	+
body_of_pancreas_female_adult_53_years	chr10	13179131	13179176	+	13179131	16	17	33	2.53357	3.37581	13179298|13179289|13179293|13179295|13179296|13179290|13179291|13179301|13179310|13179303|13179282|13179302|13179292|13179297|13179294	chr10	13178997	13179298	AluSz	+
body_of_pancreas_female_adult_53_years	chr10	38411016	38411017	+	38411016	8	8	8	0.614199	2.5	38411164|38411651|38411196|38411282|38411145|38411333	chr10	38410883	38411186	AluJb	+
body_of_pancreas_female_adult_53_years	chr10	60519533	60519572	+	60519533	3	3	8	0.614199	2.5	60519772|60519751|60519743|60519742|60519755|60519757	chr10	60519437	60519747	AluY	+
body_of_pancreas_female_adult_53_years	chr1	104260193	104260255	+	104260193	4	4	18	1.38195	3.33717	104260427|104260541|104260537|104260545|104260530|104260533|104260542|104261074|104260903|104260440|104260538	chr1	104260077	104260350	AluJr	+
body_of_pancreas_female_adult_53_years	chr11	27476721	27476804	-	27476747	5	6	17	1.30517	2.72722	27476586|27476283|27476588|27476364|27476589|27476592|27476597|27476581	chr11	27476590	27476773	AluJo	-
body_of_pancreas_female_adult_53_years	chr1	15761346	15761357	-	15761356	7	7	9	0.690974	2.50326	15761064|15761006|15761000|15761048|15761004|15761001	chr1	15761048	15761357	AluSx1	-
body_of_pancreas_female_adult_53_years	chr1	160259512	160259601	-	160259536	5	5	23	1.76582	3.4101	160259466|160259327|160259203|160259142|160259147|160259149|160259146|160259324|160259078|160259150|160259331|160259374	chr1	160259378	160259680	AluSz6	-
body_of_pancreas_female_adult_53_years	chr11	65141405	65141409	-	65141408	6	6	9	0.690974	2.5	65141318|65141175|65141189|65141179|65141177|65141150	chr11	65141063	65141358	AluJr	-
body_of_pancreas_female_adult_53_years	chr11	65206816	65206840	+	65206831	7	7	19	1.45872	3.83659	65207180|65207069|65206935|65207016|65206937|65207396|65207111|65207169|65207227|65207280|65207532|65207177|65207066|65207117|65207122	chr11	65206871	65207155	AluSz6	+
body_of_pancreas_female_adult_53_years	chr11	65207485	65207532	+	65207485	2	2	9	0.690974	2.50326	65207978|65207807|65207753|65208069|65208074|65207799	chr11	65207449	65207569	AluJr	+
body_of_pancreas_female_adult_53_years	chr1	184761391	184761431	-	184761392	8	11	25	1.91937	2.9847	184761245|184761058|184761211|184760936|184761052|184761079|184761054|184761080|184761055|184761038	chr1	184761093	184761374	AluJo	-
body_of_pancreas_female_adult_53_years	chr12	125396056	125396107	-	125396063	7	7	26	1.99615	3.83327	125395843|125395712|125395897|125395823|125395844|125395736|125395817|125395847|125395845|125395822|125395735|125395604|125395821|125395824|125395751|125395815	chr12	125395818	125396023	AluSx1	-
body_of_pancreas_female_adult_53_years	chr1	21545243	21545244	-	21545243	6	6	7	0.537424	2.58496	21544913|21544961|21545085|21544983|21544920|21544985	chr1	21545078	21545383	AluSx1	-
body_of_pancreas_female_adult_53_years	chr1	22309869	22309897	+	22309896	3	3	8	0.614199	3	22333637|22310060|22310084|22310278|22310281|22310056|22310280|22310042	chr1	22309892	22310032	AluJo	+
body_of_pancreas_female_adult_53_years	chr1	22315185	22315249	+	22315198	7	8	21	1.61227	3.26805	22315526|22315388|22315737|22315394|22315527|22315574|22315506|22315531|22315523|22315572|22315505|22315528	chr1	22315103	22315396	AluY	+
body_of_pancreas_female_adult_53_years	chr1	22322518	22322569	+	22322522	8	8	18	1.38195	3.72548	22322897|22322909|22322900|22322838|22322907|22323515|22322905|22322830|22322761|22322911|22322906|22322903|22322833|22323517	chr1	22322425	22322689	AluSz6	+
body_of_pancreas_female_adult_53_years	chr1	22332726	22332912	+	22332872	11	11	60	4.60649	4.46307	22333113|22332913|22333116|22332943|22333099|22333119|22333120|22333125|22333108|22333106|22333107|22333111|22332944|22333590|22333103|22333369|22333066|22333101|22333117|22333118|22333471|22333110|22333109|22333112|22333067|22333399|22333122|22333105	chr1	22332853	22333044	AluSx	+
body_of_pancreas_female_adult_53_years	chr1	22332973	22333026	+	22332973	11	12	18	1.38195	3.61437	22333374|22333125|22333178|22333269|22333397|22333108|22333303|22333468|22333233|22333558|22333589|22333098|22333224	chr1	22333070	22333209	AluJo	+
body_of_pancreas_female_adult_53_years	chr1	22335709	22335710	+	22335709	7	7	8	0.614199	2.52164	22335929|22335882|22335970|22335939|22336026|22335892	chr1	22335576	22335886	AluY	+
body_of_pancreas_female_adult_53_years	chr1	22335879	22335901	+	22335890	4	5	9	0.690974	3	22336018|22336712|22336031|22338990|22336097|22336669|22336823|22336705	chr1	22335886	22336074	AluSx	+
body_of_pancreas_female_adult_53_years	chr1	245007705	245007757	+	245007741	5	5	13	0.998073	3.18083	245008231|245008230|245007981|245007957|245008110|245008001|245008177|245007952|245007951|245008183	chr1	245007778	245008081	AluSx	+
body_of_pancreas_female_adult_53_years	chr14	51101159	51101242	-	51101220	5	5	23	1.76582	3.36031	51101002|51100999|51101005|51101003|51100997|51101013|51101000|51101001|51100783|51101004|51100697|51100998	chr14	51101056	51101367	AluJb	-
body_of_pancreas_female_adult_53_years	chr14	64063234	64063235	-	64063234	9	9	9	0.690974	2.72548	64062933|64062838|64062855|64062866|64062938|64062864|64062762	chr14	64062937	64063231	AluSq2	-
body_of_pancreas_female_adult_53_years	chr14	65400919	65400924	+	65400919	7	7	9	0.690974	2.75	65401178|65401185|65401187|65401143|65401179|65401184|65401140	chr14	65400779	65401095	AluSx	+
body_of_pancreas_female_adult_53_years	chr1	48662020	48662021	-	48662020	41	41	41	3.14777	3.46707	48661876|48661873|48661882|48661880|48661878|48661875|48661871|48661869|48661874|48661864|48661870|48661879|48661872|48661881	chr1	48661883	48662019	FLAM_C	-
body_of_pancreas_female_adult_53_years	chr15	65869551	65869586	+	65869571	2	3	7	0.537424	2.80735	65869802|65869909|65869797|65869821|65869773|65870345|65869800	chr15	65869491	65869764	AluJr	+
body_of_pancreas_female_adult_53_years	chr15	89744103	89744176	+	89744165	5	6	22	1.68905	3.55034	89744341|89744339|89744315|89744347|89744342|89744340|89744353|89744343|89744362|89744601|89744556|89744319|89744367	chr15	89744031	89744326	AluSq	+
body_of_pancreas_female_adult_53_years	chr1	61523585	61523586	-	61523585	47	48	48	3.68519	4.28279	61523349|61523450|61523292|61523417|61523392|61523298|61523421|61523296|61523324|61523248|61523340|61523243|61523343|61523249|61523378|61523281|61523330|61523346|61523316|61523247|61523394|61523291|61523297|61523418	chr1	61523296	61523586	AluSq2	-
body_of_pancreas_female_adult_53_years	chr16	15505177	15505194	+	15505179	2	3	8	0.614199	2.52164	15505424|15505425|15505357|15505400|15505485|15505454	chr16	15505220	15505432	AluJo	+
body_of_pancreas_female_adult_53_years	chr16	20332671	20332713	-	20332696	30	32	43	3.30132	4.09131	20316862|20332057|20332211|20332464|20332360|20332361|20332204|20332212|20332209|20332009|20332351|20332031|20332213|20332069|20332502|20332215|20332355|20332273|20332060|20332206|20332210	chr16	20332373	20332672	AluSz6	-
body_of_pancreas_female_adult_53_years	chr16	20341123	20341135	-	20341132	9	9	20	1.5355	3.18137	20340835|20340776|20340840|20340966|20340780|20340789|20340800|20340772|20340777|20340802	chr16	20340851	20341142	AluJr	-
body_of_pancreas_female_adult_53_years	chr16	29708987	29709035	+	29709024	3	3	13	0.998073	2.9183	29709324|29709314|29709323|29709320|29709319|29709308|29709330|29709315	chr16	29709025	29709334	AluSz	+
body_of_pancreas_female_adult_53_years	chr16	3084914	3084946	-	3084914	5	5	11	0.844524	2.72193	3084686|3084836|3084662|3084691|3084659|3084669|3084624	chr16	3084714	3085009	AluJb	-
body_of_pancreas_female_adult_53_years	chr16	75255990	75256003	+	75256002	15	17	21	1.61227	3.00531	75256367|75256225|75256534|75256166|75256370|75256365|75256172|75256222|75256369	chr16	75255984	75256077	AluJb	+
body_of_pancreas_female_adult_53_years	chr17	1368378	1368425	-	1368405	11	11	18	1.38195	3.24837	1368109|1368114|1367971|1367954|1368061|1368194|1368058|1368272|1368059|1367867|1368002	chr17	1368106	1368405	AluSx	-
body_of_pancreas_female_adult_53_years	chr17	29805309	29805310	-	29805309	22	22	22	1.68905	3.51603	29804917|29804934|29804922|29804924|29805158|29804921|29804925|29804931|29804928|29804923|29804837|29804933|29804902	chr17	29805014	29805310	AluSx1	-
body_of_pancreas_female_adult_53_years	chr1	8083524	8083547	-	8083539	4	6	11	0.844524	2.72193	8083290|8083103|8083288|8083285|8083287|8083281|8083286	chr1	8083333	8083638	AluJb	-
body_of_pancreas_female_adult_53_years	chr18	12153443	12153492	+	12153443	4	4	10	0.767749	2.92193	12153917|12153768|12153733|12153734|12153693|12153767|12153750|12153751	chr18	12153307	12153620	AluSz	+
body_of_pancreas_female_adult_53_years	chr18	55315418	55315438	-	55315437	4	5	8	0.614199	2.5	55315312|55315123|55314901|55314792|55315118|55314741	chr18	55315228	55315517	AluSx1	-
body_of_pancreas_female_adult_53_years	chr19	16212979	16213012	+	16213011	3	5	11	0.844524	3.02717	16213648|16213133|16213640|16213484|16213649|16213205|16213810|16213647|16213557	chr19	16212878	16213167	AluSz	+
body_of_pancreas_female_adult_53_years	chr19	50640583	50640584	-	50640583	13	13	14	1.07485	3.02699	50640430|50640401|50640367|50640358|50640364|50640363|50640370|50640368|50640361	chr19	50640452	50640584	AluYa5	-
body_of_pancreas_female_adult_53_years	chr20	32293895	32293896	-	32293895	11	11	12	0.921299	2.55034	32293727|32293545|32293708|32293690|32293723|32293721|32293679	chr20	32293719	32294031	AluSx	-
body_of_pancreas_female_adult_53_years	chr20	35518959	35519130	-	35519045	15	17	84	6.44909	4.66916	35518865|35518799|35518800|35518824|35518882|35518857|35518826|35518855|35518876|35518815|35518866|35518670|35518863|35518861|35518811|35518803|35518842|35518832|35518862|35518802|35518860|35518964|35518814|35518868|35518812|35518867|35518823|35518662|35518807|35518834|35518810|35518836|35518849|35518833|35518871|35518858|35518825	chr20	35518867	35519179	AluSq2	-
body_of_pancreas_female_adult_53_years	chr20	43941500	43941556	+	43941500	16	17	34	2.61035	4.02895	43942767|43941852|43941694|43942068|43941696|43941898|43941952|43942085|43941697|43945464|43941954|43941963|43942761|43941692|43941928|43941687|43941896|43941966|43941873|43941910	chr20	43941351	43941664	AluJb	+
body_of_pancreas_female_adult_53_years	chr20	43944058	43944097	+	43944093	8	8	15	1.15162	2.98523	43944394|43944407|43944551|43944447|43944393|43944438|43944468|43944436|43944545	chr20	43944099	43944401	AluSx3	+
body_of_pancreas_female_adult_53_years	chr21	46189433	46189460	-	46189459	7	7	16	1.2284	2.82258	46189266|46189268|46189274|46189296|46189206|46189221|46189265|46189245	chr21	46189293	46189592	AluY	-
body_of_pancreas_female_adult_53_years	chr21	46190506	46190536	-	46190534	8	9	13	0.998073	3.08496	46190330|46190302|46190324|46190241|46190243|46190240|46190250|46190244|46190234	chr21	46190334	46190631	AluSc8	-
body_of_pancreas_female_adult_53_years	chr22	24968544	24968545	+	24968544	7	7	8	0.614199	2.52164	24968740|24968745|24968744|24968739|24968858|24968861	chr22	24968448	24968740	AluSx4	+
body_of_pancreas_female_adult_53_years	chr22	26919786	26919787	-	26919786	6	6	7	0.537424	2.58496	26919518|26919363|26919651|26919675|26918726|26919362	chr22	26919535	26919848	AluSx	-
body_of_pancreas_female_adult_53_years	chr22	26921511	26921530	-	26921523	5	5	14	1.07485	3.54659	26921201|26921334|26921104|26921192|26921229|26920938|26920929|26920976|26920975|26921341|26921069|26921066	chr22	26921190	26921479	AluSx	-
body_of_pancreas_female_adult_53_years	chr22	29197530	29197538	-	29197531	12	14	18	1.38195	3.57243	29197189|29197200|29197264|29197193|29197367|29197202|29197376|29197201|29197192|29197260|29197380|29197198|29197368	chr22	29197373	29197680	AluSc8	-
body_of_pancreas_female_adult_53_years	chr22	42997234	42997235	+	42997234	7	7	7	0.537424	2.52164	42997397|42997389|42997395|42997403|42997398|42997404	chr22	42997234	42997370	FLAM_C	+
body_of_pancreas_female_adult_53_years	chr22	46633351	46633391	+	46633351	4	4	11	0.844524	3.02717	46633657|46633567|46633721|46633565|46633717|46633777|46633718|46633626|46633761	chr22	46633212	46633523	AluJr	+
body_of_pancreas_female_adult_53_years	chr2	27185027	27185028	+	27185027	6	6	6	0.460649	2.58496	27185338|27185201|27185339|27185311|27185346|27185204	chr2	27185028	27185339	AluY	+
body_of_pancreas_female_adult_53_years	chr3	111838073	111838075	+	111838074	8	9	10	0.767749	2.72548	111838260|111838255|111838257|111838258|111838253|111838262|111838256	chr3	111837949	111838247	AluSq2	+
body_of_pancreas_female_adult_53_years	chr3	141878853	141878854	-	141878853	9	9	9	0.690974	2.50326	141878696|141878670|141878683|141878695|141878705|141878694	chr3	141878696	141878989	AluSx	-
body_of_pancreas_female_adult_53_years	chr3	148568812	148568827	+	148568824	2	3	9	0.690974	2.9477	148569128|148569208|148569169|148568971|148569102|148569130|148569165|148569095	chr3	148568838	148569147	AluSx3	+
body_of_pancreas_female_adult_53_years	chr3	167176202	167176253	-	167176202	7	7	18	1.38195	3.57243	167175721|167175941|167175973|167175719|167175982|167175974|167175951|167175952|167176081|167175954|167175949|167175946|167175960	chr3	167176026	167176348	AluY	-
body_of_pancreas_female_adult_53_years	chr4	72124662	72124712	+	72124688	3	3	11	0.844524	2.73216	72124920|72125249|72124861|72124883|72124911|72125208|72124922	chr4	72124703	72124864	FAM	+
body_of_pancreas_female_adult_53_years	chr4	772594	772651	-	772631	3	4	9	0.690974	2.75	772255|772107|772303|772249|772426|772253|772257	chr4	772486	772730	AluSg	-
body_of_pancreas_female_adult_53_years	chr5	10279776	10279817	-	10279815	4	7	12	0.921299	2.9183	10279573|10279548|10279547|10279472|10279576|10279544|10279468|10279586	chr5	10279656	10279951	AluSz	-
body_of_pancreas_female_adult_53_years	chr5	143539589	143539617	-	143539616	3	3	8	0.614199	2.75	143539389|143539394|143539385|143539431|143539011|143539383|143539271	chr5	143539270	143539571	AluY	-
body_of_pancreas_female_adult_53_years	chr5	150561112	150561180	-	150561112	5	6	17	1.30517	3.61687	150560693|150560622|150560627|150560660|150560623|150560658|150560624|150560778|150560757|150560782|150560777|150560625|150560736	chr5	150560771	150561076	AluY	-
body_of_pancreas_female_adult_53_years	chr5	180258564	180258634	-	180258615	13	22	69	5.29747	4.9054	180257952|180257908|180258117|180258413|180257953|180257951|180257948|180258412|180257958|180257693|180257690|180257661|180257950|180257954|180258494|180257660|180258103|180258218|180258415|180258209|180257977|180257694|180258101|180257591|180258145|180258143|180258242|180258401|180257859|180257909|180257800|180258012|180257955|180257957|180258447|180257910|180258102	chr5	180258415	180258530	AluSq2	-
body_of_pancreas_female_adult_53_years	chr5	95130624	95130669	+	95130658	10	10	13	0.998073	2.62352	95130959|95130960|95130957|95131091|95130962|95131096|95131093	chr5	95130524	95130822	AluSz	+
body_of_pancreas_female_adult_53_years	chr6	107217193	107217242	-	107217241	5	5	14	1.07485	2.69951	107216930|107216946|107216951|107216945|107217004|107217007|107217005	chr6	107217067	107217377	AluJb	-
body_of_pancreas_female_adult_53_years	chr6	111022127	111022128	+	111022127	8	8	8	0.614199	2.5	111022460|111022448|111022388|111022387|111022466|111022350	chr6	111022127	111022414	AluSg4	+
body_of_pancreas_female_adult_53_years	chr6	122765255	122765365	-	122765351	5	6	27	2.07292	3.76718	122765042|122765137|122765135|122765120|122765121|122765122|122764753|122765134|122765138|122765139|122765118|122765124|122765123|122765117|122765229|122765136	chr6	122765165	122765430	AluJb	-
body_of_pancreas_female_adult_53_years	chr6	126300713	126300716	+	126300713	5	6	8	0.614199	2.52164	126301038|126301070|126300911|126300919|126301062|126300916	chr6	126300617	126300912	AluSg	+
body_of_pancreas_female_adult_53_years	chr6	25769654	25769683	+	25769654	7	7	13	0.998073	2.81507	25769808|25769886|25770097|25770096|25770106|25769799|25770127|25770104	chr6	25769561	25769803	AluSx1	+
body_of_pancreas_female_adult_53_years	chr6	30460848	30460885	+	30460865	3	3	9	0.690974	2.75	30461185|30461251|30461141|30461101|30461187|30461100|30461190	chr6	30460788	30461101	AluSc8	+
body_of_pancreas_female_adult_53_years	chr6	30593565	30593582	+	30593565	7	7	15	1.15162	3.12809	30593850|30594029|30593889|30593897|30593901|30594033|30593888|30593927|30593804|30593892	chr6	30593595	30593888	AluJb	+
body_of_pancreas_female_adult_53_years	chr7	117139668	117139683	+	117139682	2	3	9	0.690974	2.75	117139890|117139972|117139891|117139949|117139997|117140277|117140198	chr7	117139724	117139859	AluJb	+
body_of_pancreas_female_adult_53_years	chr7	129924603	129924606	+	129924605	6	11	11	0.844524	2.91398	129924941|129924931|129924860|129924933|129925013|129924919|129924908|129924923	chr7	129924507	129924812	AluYf4	+
body_of_pancreas_female_adult_53_years	chr7	130025973	130026372	+	130026168	15	16	193	14.8176	6.00377	130026424|130026404|130026602|130026407|130026649|130026274|130026636|130026685|130026531|130026578|130026408|130026318|130026267|130026396|130026577|130026425|130026601|130026264|130026566|130026533|130026596|130026452|130026666|130026564|130026599|130026590|130026657|130026579|130026402|130026528|130026492|130026770|130026651|130026403|130026523|130026355|130026521|130026537|130026401|130026354…	chr7	130026091	130026391	AluSc8	+
body_of_pancreas_female_adult_53_years	chr7	99173012	99173017	+	99173012	7	8	9	0.690974	2.75	99173198|99173202|99173188|99173648|99173199|99173204|99173506	chr7	99172879	99173189	AluSg	+
body_of_pancreas_female_adult_53_years	chr7	99634140	99634204	+	99634193	10	10	23	1.76582	3.34446	99634386|99634351|99634385|99634396|99634352|99634392|99634356|99634389|99634391|99634594|99634415|99634393	chr7	99634057	99634364	AluSx1	+
body_of_pancreas_female_adult_53_years	chr7	99635435	99635457	+	99635454	12	14	21	1.61227	3.59447	99635660|99635707|99635655|99635680|99635653|99635661|99635734|99635654|99635659|99635657|99635710|99635708|99635800	chr7	99635358	99635654	AluSx3	+
body_of_pancreas_female_adult_53_years	chr8	29289431	29289434	+	29289431	7	7	9	0.690974	2.72548	29289616|29289710|29289656|29289670|29289704|29289745|29289682	chr8	29289327	29289536	AluJb	+
body_of_pancreas_female_adult_53_years	chr8	37613351	37613390	+	37613362	2	2	7	0.537424	2.52164	37613505|37613512|37614050|37613522|37613513|37614052	chr8	37613425	37613716	AluSx1	+
body_of_pancreas_female_adult_53_years	chr9	111781329	111781359	-	111781349	5	8	15	1.15162	2.95021	111781026|111781139|111781013|111781017|111781014|111780854|111781023|111781025|111781022	chr9	111781019	111781329	AluJb	-
body_of_pancreas_female_adult_53_years	chr9	114984408	114984449	-	114984422	2	3	8	0.614199	2.75	114983889|114984097|114984021|114983887|114984142|114984018|114984138	chr9	114984179	114984381	FAM	-
body_of_pancreas_female_adult_53_years	chr9	135941061	135941106	+	135941085	13	17	24	1.8426	4.25163	135941472|135941466|135941508|135941607|135941469|135941481|135941773|135941327|135941505|135941654|135941746|135941389|135941653|135941463|135941453|135941497|135941462|135941326|135941663|135941443	chr9	135940951	135941256	AluSp	+
body_of_pancreas_female_adult_53_years	chr9	135941226	135941273	+	135941257	5	5	13	0.998073	3.02699	135941496|135941530|135941477|135941483|135941630|135941463|135941554|135941649|135941390	chr9	135941256	135941414	AluJb	+
body_of_pancreas_female_adult_53_years	chr9	135947671	135947750	+	135947671	7	7	32	2.4568	3.47116	135947866|135947814|135947826|135947905|135947896|135947909|135947952|135947911|135947857|135947907|135947904|135947910|135947898|135947897	chr9	135947651	135947936	AluSz	+
body_of_pancreas_female_adult_53_years	chr9	557848	557868	+	557857	2	2	6	0.460649	2.58496	558131|558152|558127|558052|558134|558050	chr9	557747	558020	AluJb	+
body_of_pancreas_female_adult_53_years	chrX	153276658	153276708	-	153276699	19	21	33	2.53357	4.01409	153276445|153276363|153276221|153276199|153276542|153276200|153276195|153276452|153276204|153276455|153276494|153276446|153276457|153276203|153276202|153276443|153276453|153276211|153276197	chrX	153276542	153276840	AluJb	-
body_of_pancreas_female_adult_53_years	chrX	2824394	2824397	-	2824394	18	19	21	1.61227	2.70161	2824210|2824032|2824155|2823995|2824212|2823625|2824292|2824211|2824122	chrX	2824177	2824481	AluJb	-
body_of_pancreas_female_adult_53_years	chrX	3526062	3526087	-	3526086	11	12	15	1.15162	3.52164	3525710|3525750|3525877|3525813|3525745|3525554|3525816|3525747|3525809|3525748|3525697|3525749	chrX	3525916	3526221	AluJb	-
body_of_pancreas_female_adult_53_years	chrX	48436253	48436370	+	48436284	23	23	76	5.83489	3.71916	48436481|48436493|48436619|48436503|48436497|48436521|48436484|48436501|48439022|48436489|48436475|48436490|48436496|48436472|48436502|48436473|48436630|48436642|48436474|48436504|48436505|48436531|48436500	chrX	48436270	48436480	AluSx	+
breast_epithelium_female_adult_51_years	chr10	112648784	112648813	+	112648791	3	3	6	0.399652	2.58496	112649308|112649295|112649286|112649285|112649293|112649287	chr10	112648732	112649003	AluSx4	+
breast_epithelium_female_adult_51_years	chr10	13179130	13179198	+	13179131	45	48	120	7.99305	4.1856	13179298|13179320|13179304|13179295|13179309|13179313|13179293|13179495|13179316|13179303|13179493|13179299|13179311|13179288|13179281|13179289|13179292|13179306|13179296|13179300|13179290|13179287|13179567|13179315|13179283|13179301|13179435|13179307|13179297|13179294	chr10	13178997	13179298	AluSz	+
breast_epithelium_female_adult_51_years	chr10	20124968	20125000	+	20124968	3	3	10	0.666087	2.9477	20125165|20125153|20125093|20125183|20125141|20125150|20125128|20125129	chr10	20124820	20125123	AluJo	+
breast_epithelium_female_adult_51_years	chr10	28852989	28853018	+	28853000	2	3	7	0.466261	2.52164	28853339|28853244|28853446|28853228|28853341|28853224	chr10	28852923	28853208	AluJb	+
breast_epithelium_female_adult_51_years	chr10	29942053	29942094	-	29942058	3	5	15	0.999131	3.03915	29941917|29941903|29941925|29941924|29941902|29941929|29941918|29941923|29941931	chr10	29941929	29942058	FLAM_C	-
breast_epithelium_female_adult_51_years	chr10	70242616	70242644	-	70242640	2	2	7	0.466261	2.52164	70242388|70242492|70242487|70242488|70242391|70242495	chr10	70242483	70242593	FLAM_A	-
breast_epithelium_female_adult_51_years	chr11	114055764	114055810	+	114055809	3	3	11	0.732696	3.09579	114056166|114056142|114056061|114056141|114056055|114056058|114056419|114056062|114056057	chr11	114055767	114055954	AluJb	+
breast_epithelium_female_adult_51_years	chr11	47235985	47236023	+	47236000	4	6	17	1.13235	3.875	47236755|47254385|47238539|47237378|47236349|47236714|47236338|47238499|47236337|47236741|47236582|47236182|47236713|47236757|47236342	chr11	47236061	47236338	AluJo	+
breast_epithelium_female_adult_51_years	chr1	160259544	160259545	-	160259544	6	6	7	0.466261	2.58496	160259386|160259142|160259010|160259009|160259144|160259380	chr1	160259378	160259680	AluSz6	-
breast_epithelium_female_adult_51_years	chr11	65206816	65206876	+	65206831	2	2	6	0.399652	2.58496	65207012|65207018|65207113|65207079|65207068|65207144	chr11	65206871	65207155	AluSz6	+
breast_epithelium_female_adult_51_years	chr11	65207729	65207753	+	65207752	5	9	11	0.732696	3.27761	65208050|65208041|65208039|65208071|65207944|65208048|65208164|65207939|65207943|65207946	chr11	65207794	65207955	AluJr	+
breast_epithelium_female_adult_51_years	chr11	65208141	65208182	+	65208157	5	5	17	1.13235	3.29277	65208380|65208551|65208431|65208406|65208408|65208413|65208390|65208637|65208409|65208393|65208562	chr11	65208071	65208335	AluSx3	+
breast_epithelium_female_adult_51_years	chr11	68361675	68361693	+	68361683	6	6	11	0.732696	2.52193	68361800|68361794|68361804|68361801|68361795|68361797|68361845	chr11	68361684	68361728	FAM	+
breast_epithelium_female_adult_51_years	chr11	70097639	70097670	-	70097649	2	2	9	0.599478	2.75	70097492|70097082|70096999|70097014|70096750|70097073|70097387	chr11	70097559	70097723	AluSx1	-
breast_epithelium_female_adult_51_years	chr12	102009826	102009924	-	102009852	20	20	49	3.26383	4.02255	102009639|102009665|102009663|102009653|102009655|102009648|102009645|102009521|102009647|102009642|102009680|102009649|102009640|102009650|102009542|102009644|102009651|102009643|102009641|102009675|102009646	chr12	102009667	102009781	AluJo	-
breast_epithelium_female_adult_51_years	chr12	125396056	125396079	-	125396056	3	3	9	0.599478	2.75	125395820|125395822|125395747|125395821|125395825|125395824|125395682	chr12	125395818	125396023	AluSx1	-
breast_epithelium_female_adult_51_years	chr1	228291125	228291190	+	228291142	5	5	15	0.999131	3.32323	228291939|228291934|228291793|228291794|228291394|228291699|228291713|228291664|228291798|228291666|228291515	chr1	228291219	228291508	AluSz	+
breast_epithelium_female_adult_51_years	chr12	56496448	56496460	+	56496459	6	6	8	0.53287	3	56496763|56497172|56497205|56496764|56497012|56496934|56496767|56496744	chr12	56496471	56496704	AluJr	+
breast_epithelium_female_adult_51_years	chr12	7247910	7247946	-	7247912	6	8	13	0.865913	2.62352	7247732|7247735|7247734|7247733|7247675|7247698|7247700	chr12	7247714	7248009	AluSc	-
breast_epithelium_female_adult_51_years	chr13	111050883	111050913	+	111050892	3	3	7	0.466261	2.52164	111051043|111051059|111051062|111051067|111051061|111051057	chr13	111050724	111051069	AluSz	+
breast_epithelium_female_adult_51_years	chr1	37999921	37999924	-	37999923	17	18	19	1.26557	3.35021	37999751|37999752|37999688|37999579|37999753|37999426|37999744|37999748|37999745|37999746|37999826	chr1	37999761	37999893	FLAM_A	-
breast_epithelium_female_adult_51_years	chr14	51101220	51101286	-	51101269	2	2	11	0.732696	3.12193	51100790|51100681|51101004|51100996|51100999|51100998|51100997|51101000|51101051	chr14	51101056	51101367	AluJb	-
breast_epithelium_female_adult_51_years	chr14	64063234	64063235	-	64063234	8	8	8	0.53287	2.75	64062854|64062532|64062835|64062757|64062806|64062865|64062867	chr14	64062937	64063231	AluSq2	-
breast_epithelium_female_adult_51_years	chr14	68144542	68144606	-	68144591	2	2	11	0.732696	3.02717	68143791|68144299|68144302|68144310|68144291|68144296|68144307|68144298|68144290	chr14	68144496	68144578	AluSq10	-
breast_epithelium_female_adult_51_years	chr1	48662020	48662021	-	48662020	13	13	13	0.865913	3.2389	48661881|48661871|48661875|48661874|48661879|48661870|48661872|48661876|48661880|48661878	chr1	48661883	48662019	FLAM_C	-
breast_epithelium_female_adult_51_years	chr15	52935153	52935186	-	52935153	2	2	7	0.466261	2.52164	52934877|52935011|52934863|52934628|52934858|52934783	chr15	52935009	52935163	AluJr	-
breast_epithelium_female_adult_51_years	chr15	63361178	63361205	+	63361204	3	3	8	0.53287	2.52164	63361489|63361445|63361488|63361487|63361482|63361484	chr15	63361065	63361365	AluY	+
breast_epithelium_female_adult_51_years	chr17	1368266	1368287	-	1368270	5	5	9	0.599478	2.72548	1368060|1368141|1367977|1367863|1368056|1368151|1367725	chr17	1368106	1368405	AluSx	-
breast_epithelium_female_adult_51_years	chr17	30707854	30707877	+	30707869	7	7	16	1.06574	3.32782	30708067|30707991|30707992|30708087|30707990|30707994|30708279|30708245|30708010|30708084|30707999	chr17	30707738	30708000	AluSx	+
breast_epithelium_female_adult_51_years	chr17	37367653	37367705	-	37367692	2	2	14	0.932522	3.6645	37367503|37367515|37367419|37367523|37367518|37367445|37367459|37367527|37367513|37367370|37367424|37367514|37367542	chr17	37367525	37367838	AluSx1	-
breast_epithelium_female_adult_51_years	chr17	38635700	38635701	-	38635700	22	22	22	1.46539	3.87966	38635418|38635371|38635407|38635220|38635106|38635415|38635084|38635414|38635104|38635373|38635400|38635113|38635231|38635410|38635218|38635523	chr17	38635413	38635698	AluSx	-
breast_epithelium_female_adult_51_years	chr17	40555223	40555250	-	40555249	3	3	17	1.13235	3.69012	40554817|40554816|40555129|40554812|40555064|40555117|40555003|40554972|40555051|40555066|40554867|40555065|40555005|40555054	chr17	40555091	40555246	AluJr	-
breast_epithelium_female_adult_51_years	chr17	6678212	6678226	+	6678212	4	5	8	0.53287	2.52164	6678378|6678727|6678596|6678440|6678377|6678579	chr17	6678077	6678378	AluSx1	+
breast_epithelium_female_adult_51_years	chr17	7485022	7485066	+	7485022	3	3	8	0.53287	2.5	7485327|7485273|7485276|7485278|7485279|7485326	chr17	7484958	7485270	AluSz	+
breast_epithelium_female_adult_51_years	chr1	8080837	8080907	-	8080874	3	3	14	0.932522	3.32486	8080771|8080517|8080520|8080442|8080519|8080537|8080549|8080528|8080516|8080518|8080533	chr1	8080612	8080904	AluSp	-
breast_epithelium_female_adult_51_years	chr1	8083646	8083705	-	8083646	6	6	18	1.19896	3.83659	8083290|8083286|8083285|8083038|8083498|8083291|8083289|8083283|8083397|8083086|8082972|8083287|8083547|8082862|8083114	chr1	8083333	8083638	AluJb	-
breast_epithelium_female_adult_51_years	chr18	46943776	46943842	-	46943819	4	4	11	0.732696	2.66353	46943632|46943526|46943530|46943463|46943416|46943459|46943527	chr18	46943532	46943818	AluJo	-
breast_epithelium_female_adult_51_years	chr19	16212961	16213010	+	16213009	6	7	14	0.932522	3.23593	16213485|16213674|16213643|16213642|16213648|16213486|16213637|16213220|16213641|16213639	chr19	16212878	16213167	AluSz	+
breast_epithelium_female_adult_51_years	chr19	19648496	19648497	+	19648496	8	8	8	0.53287	3	19648700|19648771|19648767|19648685|19648691|19648774|19649025|19648671	chr19	19648545	19648673	AluJr4	+
breast_epithelium_female_adult_51_years	chr19	23542164	23542189	-	23542188	4	4	10	0.666087	2.72548	23542029|23542056|23541845|23541885|23541882|23541847|23541995	chr19	23542023	23542308	AluY	-
breast_epithelium_female_adult_51_years	chr19	45596086	45596091	-	45596086	4	4	7	0.466261	2.58496	45595377|45595472|45595473|45595433|45595698|45595813	chr19	45595752	45596044	AluJr	-
breast_epithelium_female_adult_51_years	chr20	35518981	35519136	-	35519045	32	32	154	10.2577	4.72258	35518809|35518799|35518853|35518718|35518804|35518837|35518821|35518881|35518863|35518871|35518867|35518838|35518830|35518839|35518856|35518859|35518826|35518818|35518869|35518847|35518807|35518834|35518855|35518822|35518886|35518801|35518851|35518858|35518849|35518704|35518800|35518805|35518808|35518864|35518828|35518684|35518845|35518850|35518802|35518861|35518811|35518803|35518842|35518816|355…	chr20	35518867	35519179	AluSq2	-
breast_epithelium_female_adult_51_years	chr20	54942547	54942561	+	54942547	3	4	7	0.466261	2.80735	54942759|54942952|54942705|54942700|54942704|54942951|54942888	chr20	54942412	54942704	AluSz	+
breast_epithelium_female_adult_51_years	chr2	131186073	131186126	-	131186096	10	10	23	1.532	4.05596	131185303|131185642|131185680|131185798|131185312|131185935|131185677|131185878|131185742|131185759|131185718|131185335|131185589|131185682|131185626|131185637|131183568|131185741	chr2	131185946	131186078	AluY	-
breast_epithelium_female_adult_51_years	chr2	134885627	134885671	+	134885654	4	4	15	0.999131	2.60624	134885854|134885795|134885797|134885855|134885861|134885834|134885859	chr2	134885657	134885791	FLAM_C	+
breast_epithelium_female_adult_51_years	chr21	46189456	46189471	-	46189459	3	4	8	0.53287	2.80735	46188964|46188965|46189255|46189256|46189258|46189267|46189257	chr21	46189293	46189592	AluY	-
breast_epithelium_female_adult_51_years	chr2	213339601	213339674	-	213339629	4	4	30	1.99826	3.483	213339381|213339378|213339369|213339375|213339377|213339374|213339365|213339136|213339379|213338834|213339257|213339382|213339376	chr2	213339532	213339669	AluJr	-
breast_epithelium_female_adult_51_years	chr2	213339747	213339776	-	213339757	2	2	7	0.466261	2.52164	213339371|213339383|213339379|213339375|213339382|213339377	chr2	213339669	213339760	AluJr	-
breast_epithelium_female_adult_51_years	chr2	9664212	9664223	-	9664217	7	7	14	0.932522	2.61058	9664011|9663932|9663930|9663933|9664010|9663929|9663935	chr2	9664002	9664168	AluJr	-
breast_epithelium_female_adult_51_years	chr3	112936215	112936264	+	112936236	5	5	19	1.26557	3.2391	112936448|112936407|112936384|112936471|112936382|112936426|112936421|112936464|112936383|112936472|112936385	chr3	112936222	112936389	AluJb	+
breast_epithelium_female_adult_51_years	chr3	141878809	141878854	-	141878853	8	8	22	1.46539	3.44286	141878615|141878696|141878670|141878672|141878695|141878668|141878694|141878697|141878698|141878674|141878691|141878690|141878671	chr3	141878696	141878989	AluSx	-
breast_epithelium_female_adult_51_years	chr3	158448360	158448387	-	158448385	5	6	13	0.865913	2.56545	158448180|158448212|158448175|158448176|158448223|158448195|158448173	chr3	158448213	158448536	AluJb	-
breast_epithelium_female_adult_51_years	chr3	172223852	172223988	-	172223860	6	6	37	2.46452	4.61486	172223693|172223616|172223734|172223631|172223630|172223641|172223383|172223388|172223554|172223803|172223397|172223386|172223728|172223550|172223633|172223615|172223638|172223385|172223389|172223614|172223710|172223642|172223764|172223613|172223736|172223610|172223612	chr3	172223515	172223813	AluSc	-
breast_epithelium_female_adult_51_years	chr3	186715397	186715427	+	186715397	3	3	7	0.466261	2.52164	186715571|186715577|186715554|186715553|186715601|186715590	chr3	186715267	186715561	AluJb	+
breast_epithelium_female_adult_51_years	chr3	9498525	9498554	+	9498525	3	3	10	0.666087	2.9477	9498679|9498705|9498693|9498683|9498680|9498703|9498666|9498786	chr3	9498376	9498679	AluSc	+
breast_epithelium_female_adult_51_years	chr5	148877519	148877561	-	148877560	9	9	16	1.06574	3.37356	148877363|148877359|148877325|148877078|148876971|148877358|148877241|148877356|148877255|148876972|148877355|148877286	chr5	148877385	148877693	AluSg4	-
breast_epithelium_female_adult_51_years	chr5	180258568	180258639	-	180258611	26	29	138	9.192	5.6189	180258416|180258091|180257950|180257913|180258397|180258141|180258225|180258207|180257860|180258405|180258317|180257954|180258032|180258208|180258192|180258218|180258197|180258149|180258143|180258242|180258489|180258144|180258115|180257909|180257952|180258220|180258205|180258424|180258412|180258142|180257910|180258011|180258458|180258139|180258415|180258117|180258413|180257953|180257951|180257784…	chr5	180258415	180258530	AluSq2	-
breast_epithelium_female_adult_51_years	chr5	40825970	40825972	-	40825971	5	7	8	0.53287	2.80735	40825661|40825751|40825768|40825736|40825753|40825800|40825738	chr5	40825815	40826110	AluSx	-
breast_epithelium_female_adult_51_years	chr6	122765332	122765809	-	122765609	18	18	223	14.8537	5.69194	122765645|122765137|122765541|122765120|122765431|122765498|122765125|122765142|122765303|122765301|122765126|122765140|122765124|122765037|122765662|122765136|122765350|122765478|122765306|122765543|122765149|122765646|122765118|122765153|122765454|122765141|122765264|122765465|122765429|122765473|122765268|122765100|122765145|122765119|122764979|122764580|122765476|122765135|122765187|122765103…	chr6	122765165	122765430	AluJb	-
breast_epithelium_female_adult_51_years	chr6	129265651	129265671	+	129265651	2	2	7	0.466261	2.52164	129265956|129265795|129265941|129265799|129265913|129265951	chr6	129265657	129265788	AluSx3	+
breast_epithelium_female_adult_51_years	chr6	129762976	129763047	+	129762976	5	5	15	0.999131	3.24022	129763183|129763248|129763135|129763331|129763137|129763466|129763468|129763136|129763246|129763247	chr6	129762841	129763139	AluJo	+
breast_epithelium_female_adult_51_years	chr6	149912221	149912258	+	149912222	3	5	11	0.732696	2.73216	149912486|149912454|149912481|149912551|149912457|149912557|149912550	chr6	149912148	149912439	AluSc	+
breast_epithelium_female_adult_51_years	chr6	160100987	160101012	-	160100987	2	2	7	0.466261	2.58496	160100857|160100505|160100660|160100281|160100325|160100489	chr6	160100827	160100958	AluSz	-
breast_epithelium_female_adult_51_years	chr6	25297315	25297331	-	25297327	7	8	11	0.732696	3.12193	25297074|25297213|25297064|25297140|25296793|25297096|25297066|25297233|25297151	chr6	25297198	25297319	FLAM_A	-
breast_epithelium_female_adult_51_years	chr6	28953435	28953471	+	28953460	2	2	6	0.399652	2.58496	28954113|28953641|28954107|28954179|28954105|28953648	chr6	28953490	28953573	AluJr	+
breast_epithelium_female_adult_51_years	chr6	30460832	30460887	+	30460886	2	3	14	0.932522	3.6645	30461150|30461592|30461095|30461098|30461187|30461140|30461679|30461188|30461233|30461210|30461099|30461146|30461143	chr6	30460788	30461101	AluSc8	+
breast_epithelium_female_adult_51_years	chr6	31802168	31802173	-	31802172	16	16	18	1.19896	3.35021	31801995|31802073|31801934|31802072|31801976|31801987|31802074|31801994|31802071|31802000|31802011|31801993	chr6	31802039	31802177	AluJb	-
breast_epithelium_female_adult_51_years	chr7	64170318	64170338	+	64170318	3	3	6	0.399652	2.58496	64170740|64170742|64170747|64170743|64170746|64170562	chr7	64170221	64170525	AluSq	+
breast_epithelium_female_adult_51_years	chr7	73154026	73154045	-	73154044	4	5	9	0.599478	2.75	73153211|73153906|73153816|73153814|73152394|73153604|73153919	chr7	73153925	73154059	AluJr	-
breast_epithelium_female_adult_51_years	chr7	95220445	95220481	-	95220445	3	3	6	0.399652	2.58496	95219983|95220205|95219879|95220104|95219952|95220179	chr7	95220244	95220546	AluJo	-
breast_epithelium_female_adult_51_years	chr8	124514729	124514777	-	124514757	2	3	8	0.53287	2.80735	124514068|124514587|124514252|124514478|124514220|124514675|124514538	chr8	124514705	124514776	FRAM	-
breast_epithelium_female_adult_51_years	chr8	75664253	75664266	+	75664253	6	6	13	0.865913	3.25163	75664686|75664745|75664632|75664675|75664672|75671106|75664633|75664682|75664685|75664668	chr8	75664251	75664537	AluJb	+
breast_epithelium_female_adult_51_years	chr8	99057872	99057900	+	99057887	3	3	10	0.666087	3.16993	99058272|99058664|99058333|99058270|99058554|99058669|99058378|99058106|99058643	chr8	99057920	99058242	AluJb	+
breast_epithelium_female_adult_51_years	chr9	114984417	114984467	-	114984439	2	2	8	0.53287	2.75	114984020|114984099|114983946|114983888|114983981|114984139|114984141	chr9	114984179	114984381	FAM	-
breast_epithelium_female_adult_51_years	chr9	132590220	132590273	-	132590244	4	5	12	0.799305	3.08496	132590002|132590045|132589909|132589840|132589912|132589914|132589910|132590057|132590020	chr9	132590056	132590371	AluSp	-
breast_epithelium_female_adult_51_years	chrX	153276699	153276700	-	153276699	7	7	8	0.53287	2.52164	153276524|153276196|153276198|153276200|153276239|153276203	chrX	153276542	153276840	AluJb	-
breast_epithelium_female_adult_51_years	chrX	16779638	16779690	+	16779675	3	3	15	0.999131	3.64022	16779876|16779878|16779840|16779875|16780220|16779830|16779842|16779974|16779873|16779874|16779877|16779816|16779975	chrX	16779689	16779800	AluSx	+
breast_epithelium_female_adult_51_years	chrX	3526050	3526087	-	3526086	2	2	6	0.399652	2.58496	3525752|3525686|3525750|3525808|3525807|3525794	chrX	3525916	3526221	AluJb	-
breast_epithelium_female_adult_51_years	chrX	48436262	48436332	+	48436284	12	12	32	2.13148	2.6621	48436504|48436502|48436475|48436505|48436503|48436501|48436622|48436499|48436587|48436542	chrX	48436270	48436480	AluSx	+
breast_epithelium_female_adult_53_years	chr10	104588648	104588649	+	104588648	11	11	11	1.34272	2.91398	104588953|104588951|104588955|104588960|104588952|104588958|104588949|104588950	chr10	104588655	104588921	AluSx	+
breast_epithelium_female_adult_53_years	chr10	114835593	114835629	+	114835625	2	2	8	0.976522	3	114835780|114836222|114835792|114835878|114835880|114835867|114835869|114835865	chr10	114835632	114835916	AluSx	+
breast_epithelium_female_adult_53_years	chr10	116244295	116244315	-	116244305	3	4	9	1.09859	2.9477	116244153|116244146|116244052|116244138|116244133|116244090|116244089|116244094	chr10	116244140	116244441	AluSx1	-
breast_epithelium_female_adult_53_years	chr10	116446686	116446695	-	116446690	5	5	11	1.34272	2.91398	116446551|116446373|116446358|116446368|116446382|116446374|116446371|116446396	chr10	116446376	116446685	AluJo	-
breast_epithelium_female_adult_53_years	chr10	120812187	120812231	-	120812187	21	21	31	3.78402	4.32485	120811899|120811891|120811933|120811900|120810714|120812011|120811892|120811886|120812018|120812001|120811997|120812010|120811889|120811796|120811887|120811884|120812006|120811894|120811994|120811908|120811888|120811885	chr10	120811911	120812187	AluJb	-
breast_epithelium_female_adult_53_years	chr10	13179007	13179198	+	13179131	46	56	190	23.1924	4.4624	13179300|13179290|13179309|13179295|13179282|13179303|13179285|13179302|13179304|13179317|13179284|13179506|13179283|13179315|13179301|13179298|13179289|13179291|13179299|13179311|13179568|13179286|13179305|13179296|13179307|13179310|13179306|13179320|13179570|13179293|13179294|13179355|13179292|13179297	chr10	13178997	13179298	AluSz	+
breast_epithelium_female_adult_53_years	chr10	28624198	28624225	-	28624224	2	2	8	0.976522	2.80735	28623964|28623961|28623967|28623877|28623942|28623935|28623893	chr10	28624166	28624259	AluYc	-
breast_epithelium_female_adult_53_years	chr10	28812632	28812676	-	28812675	9	9	17	2.07511	2.53661	28812484|28812330|28812475|28812509|28812331|28812474|28812481	chr10	28812502	28812687	AluSc	-
breast_epithelium_female_adult_53_years	chr10	28852970	28853001	+	28852989	5	5	10	1.22065	2.9477	28853226|28853207|28853219|28853214|28853215|28853225|28853111|28853188	chr10	28852923	28853208	AluJb	+
breast_epithelium_female_adult_53_years	chr10	34868813	34868834	-	34868813	6	6	10	1.22065	2.72193	34868487|34868485|34868504|34868482|34868510|34868506|34868508	chr10	34868523	34868823	AluSz	-
breast_epithelium_female_adult_53_years	chr10	37460869	37461007	+	37460988	16	17	109	13.3051	5.06957	37461208|37461206|37461198|37461513|37461216|37461219|37473014|37461213|37473313|37461516|37461225|37461215|37461122|37461068|37473027|37461135|37461080|37473016|37461227|37466666|37461086|37461160|37461518|37461209|37461232|37461056|37461199|37461203|37461211|37461193|37461226|37461221|37461218|37461207|37461557|37461224|37461223|37461138|37461228|37461205|37461222|37461204|37461060|37461214|374…	chr10	37460991	37461154	AluSc8	+
breast_epithelium_female_adult_53_years	chr10	37472823	37472893	+	37472865	3	3	10	1.22065	3.12193	37473025|37473194|37473319|37473037|37473153|37473303|37473038|37473047|37473088	chr10	37472794	37472948	AluSc8	+
breast_epithelium_female_adult_53_years	chr10	37672653	37672706	+	37672679	5	5	12	1.46478	3.08496	37672955|37673341|37672795|37673231|37673319|37673232|37673233|37673150|37673311	chr10	37672745	37673053	AluY	+
breast_epithelium_female_adult_53_years	chr10	37704148	37704171	+	37704170	3	3	8	0.976522	3	37704504|37704453|37704462|37704495|37704503|37704301|37704467|37704451	chr10	37704160	37704453	AluJr	+
breast_epithelium_female_adult_53_years	chr10	37717124	37717147	+	37717131	4	4	14	1.70891	2.84237	37717372|37717464|37717355|37717319|37717422|37717330|37717393|37717314	chr10	37717133	37717267	AluJb	+
breast_epithelium_female_adult_53_years	chr10	65232837	65232848	-	65232837	4	4	9	1.09859	2.72548	65232662|65232672|65232651|65232635|65232652|65232642|65232674	chr10	65232539	65232842	AluSc	-
breast_epithelium_female_adult_53_years	chr10	65252022	65252042	-	65252022	6	6	10	1.22065	2.72548	65251813|65251828|65251718|65251822|65251876|65251826|65251827	chr10	65251794	65252010	AluJb	-
breast_epithelium_female_adult_53_years	chr10	70849517	70849544	+	70849531	6	6	11	1.34272	2.84535	70849649|70849680|70849673|70849661|70849675|70849663|70849667|70849694	chr10	70849369	70849709	AluSx3	+
breast_epithelium_female_adult_53_years	chr10	70894553	70894575	+	70894553	12	12	15	1.83098	2.92323	70894698|70894742|70894756|70894699|70894759|70894700|70894717|70894738|70894719	chr10	70894566	70894699	FLAM_C	+
breast_epithelium_female_adult_53_years	chr10	76938816	76938858	+	76938816	5	5	12	1.46478	2.79248	76938998|76938954|76939890|76939248|76939216|76938957|76938958|76939033	chr10	76938821	76939100	AluJb	+
breast_epithelium_female_adult_53_years	chr10	76940173	76940207	+	76940173	5	5	11	1.34272	2.73216	76940356|76940265|76940414|76940379|76940393|76940353|76940385|76940416	chr10	76940058	76940348	AluSx4	+
breast_epithelium_female_adult_53_years	chr10	81500214	81500229	-	81500214	5	5	9	1.09859	2.5	81499929|81499935|81500114|81499932|81499934|81499928	chr10	81500004	81500214	AluJb	-
breast_epithelium_female_adult_53_years	chr10	89707462	89707465	+	89707464	7	9	9	1.09859	2.72548	89707686|89707689|89707660|89707685|89707691|89707570|89707661	chr10	89707366	89707676	AluSc8	+
breast_epithelium_female_adult_53_years	chr10	95239058	95239079	-	95239058	9	9	11	1.34272	2.73216	95238898|95238899|95238890|95238904|95238902|95238903|95238905	chr10	95238895	95239042	AluSx3	-
breast_epithelium_female_adult_53_years	chr1	10067707	10067780	+	10067742	7	10	43	5.24881	4.21073	10068270|10068281|10068267|10075946|10075976|10068291|10068295|10068283|10068292|10068293|10068286|10068271|10068268|10068311|10068272|10075932|10068287|10068290|10068294|10068288|10075942|10068296	chr1	10067823	10068125	AluSx1	+
breast_epithelium_female_adult_53_years	chr1	10170890	10170908	+	10170890	5	5	15	1.83098	3.23593	10171131|10171133|10171111|10171122|10171127|10171105|10171124|10171113|10171120|10171126	chr1	10170908	10171053	FRAM	+
breast_epithelium_female_adult_53_years	chr11	113949665	113949726	+	113949703	8	8	27	3.29576	3.70347	113949828|113949832|113950069|113949834|113949837|113949848|113949843|113949840|113949835|113949833|113949842|113949831|113949766|113949853	chr11	113949704	113949850	AluSx	+
breast_epithelium_female_adult_53_years	chr11	114060157	114060205	+	114060169	5	5	14	1.70891	2.95021	114060397|114060422|114060388|114060341|114060400|114060556|114060330|114060392|114060342	chr11	114060250	114060502	AluSc5	+
breast_epithelium_female_adult_53_years	chr11	114183862	114183948	+	114183916	6	6	29	3.53989	3.89246	114184107|114184092|114184105|114184063|114184104|114184109|114184026|114184097|114184114|114184056|114184094|114184108|114184098|114184128|114184095|114184116|114184080	chr11	114183918	114184218	AluSz	+
breast_epithelium_female_adult_53_years	chr11	121601810	121601827	-	121601810	6	6	14	1.70891	3.80735	121601596|121601529|121601534|121601540|121601543|121601538|121601536|121601537|121601535|121601547|121601545|121601531|121601533|121601544	chr11	121601568	121601810	AluSx3	-
breast_epithelium_female_adult_53_years	chr11	122943134	122943177	-	122943134	4	4	11	1.34272	3.32193	122942948|122943015|122943026|122943028|122943038|122943018|122942838|122942525|122943027|122942845	chr11	122943019	122943114	AluSx	-
breast_epithelium_female_adult_53_years	chr1	115248354	115248405	-	115248404	6	6	12	1.46478	3.02205	115248089|115248092|115247858|115248226|115248087|115248091|115248230|115248030|115248084	chr1	115248250	115248409	AluSx3	-
breast_epithelium_female_adult_53_years	chr11	17109919	17109971	-	17109959	3	3	10	1.22065	2.64644	17109768|17109816|17109817|17109596|17109537|17109651|17109804	chr11	17109795	17110088	AluSq2	-
breast_epithelium_female_adult_53_years	chr1	145660561	145660571	+	145660561	4	5	9	1.09859	2.5	145660773|145660774|145660772|145660770|145660769|145660771	chr1	145660424	145660735	AluSz	+
breast_epithelium_female_adult_53_years	chr11	46029012	46029030	-	46029029	9	9	16	1.95304	3	46028865|46028867|46028870|46028872|46028676|46028864|46028871|46028666|46028782	chr11	46028855	46029165	AluSq2	-
breast_epithelium_female_adult_53_years	chr1	14625714	14625715	+	14625714	9	9	9	1.09859	2.6416	14625845|14625851|14626038|14626008|14625968|14625898|14625887	chr1	14625715	14625987	AluSx	+
breast_epithelium_female_adult_53_years	chr11	46556525	46556526	-	46556525	10	10	11	1.34272	2.52193	46556256|46556274|46556266|46556250|46556227|46556240	chr11	46556231	46556523	AluJb	-
breast_epithelium_female_adult_53_years	chr1	155885075	155885085	-	155885075	10	12	17	2.07511	2.70282	155884862|155884919|155884852|155884857|155884850|155884849|155884853	chr1	155884902	155885211	AluSx	-
breast_epithelium_female_adult_53_years	chr1	161400466	161400507	+	161400466	2	2	7	0.854457	2.52164	161400659|161400667|161400666|161400658|161400670|161400728	chr1	161400329	161400609	AluSx	+
breast_epithelium_female_adult_53_years	chr11	63338387	63338503	-	63338412	29	31	63	7.69011	4.90149	63338274|63338248|63338260|63338272|63338282|63338252|63338271|63338262|63338266|63338268|63338250|63338289|63338269|63338279|63338196|63338245|63338242|63338155|63338291|63338247|63338246|63338267|63338251|63338273|63338253|63338270|63338275|63338277|63338243|63338285|63338249|63338255|63338281|63338204|63338290	chr11	63338305	63338393	AluJr	-
breast_epithelium_female_adult_53_years	chr11	63340612	63340622	-	63340612	2	2	7	0.854457	2.52164	63340403|63340484|63340468|63340472|63340474|63340466	chr11	63340504	63340621	AluJo	-
breast_epithelium_female_adult_53_years	chr11	65206816	65206849	+	65206831	15	15	34	4.15022	3.91469	65207076|65207180|65207075|65207016|65207069|65207170|65207011|65207118|65207066|65207020|65207059|65207168|65207021|65207534|65207013|65207085|65207175|65207179|65207117	chr11	65206871	65207155	AluSz6	+
breast_epithelium_female_adult_53_years	chr11	65207395	65207450	+	65207446	8	8	23	2.8075	3.45852	65207545|65207747|65207568|65207531|65207753|65207744|65207720|65207596|65207713|65207602|65207524|65207598|65207746	chr11	65207449	65207569	AluJr	+
breast_epithelium_female_adult_53_years	chr11	65210034	65210080	+	65210055	9	9	25	3.05163	4.4183	65210219|65210272|65210235|65210262|65210270|65210174|65210273|65210255|65210271|65210175|65210258|65210252|65210620|65210621|65210240|65210261|65210268|65210282|65210218|65210209|65210204|65210173	chr11	65210074	65210365	AluSx4	+
breast_epithelium_female_adult_53_years	chr11	65215552	65215556	-	65215555	11	11	13	1.58685	2.87314	65215345|65215266|65215392|65215368|65215394|65215367|65215397|65215369	chr11	65215264	65215566	AluSc	-
breast_epithelium_female_adult_53_years	chr1	179326727	179326760	+	179326727	5	5	14	1.70891	3.02699	179326942|179326939|179326941|179327119|179327038|179327046|179326959|179326932|179327102	chr1	179326747	179326983	AluJo	+
breast_epithelium_female_adult_53_years	chr11	85703052	85703081	-	85703062	3	3	7	0.854457	2.58496	85702894|85702885|85702891|85702753|85702897|85702892	chr11	85702896	85703178	AluJr	-
breast_epithelium_female_adult_53_years	chr1	203457500	203457512	+	203457501	9	11	19	2.31924	3.07085	203458409|203457755|203457706|203457622|203457668|203457808|203457679|203457680|203457677|203457684	chr1	203457361	203457666	AluSx	+
breast_epithelium_female_adult_53_years	chr1	204521108	204521111	+	204521109	4	7	8	0.976522	2.52164	204521256|204521258|204521261|204521257|204521249|204521254	chr1	204521132	204521433	AluSp	+
breast_epithelium_female_adult_53_years	chr12	101997399	101997441	+	101997399	4	4	7	0.854457	2.52164	101997939|101997575|101997741|101997868|101997938|101997607	chr12	101997440	101997712	AluJb	+
breast_epithelium_female_adult_53_years	chr12	125395925	125396026	-	125395999	8	8	29	3.53989	3.97489	125395686|125395840|125395715|125395685|125395852|125395822|125395823|125395845|125395821|125395285|125395824|125395851|125395892|125395748|125395735|125395812|125395731|125395846	chr12	125395818	125396023	AluSx1	-
breast_epithelium_female_adult_53_years	chr1	214529429	214529466	-	214529447	5	5	13	1.58685	2.68872	214529304|214529320|214529270|214529116|214529306|214529183|214529220	chr1	214529294	214529600	AluJb	-
breast_epithelium_female_adult_53_years	chr12	19640512	19640515	+	19640514	6	8	8	0.976522	2.75	19640678|19640680|19640669|19640672|19640683|19640670|19640681	chr12	19640369	19640682	AluSz	+
breast_epithelium_female_adult_53_years	chr1	224372524	224372552	+	224372524	6	6	10	1.22065	2.64644	224372693|224372698|224372689|224372691|224372726|224372685|224372687	chr1	224372554	224372672	AluJo	+
breast_epithelium_female_adult_53_years	chr1	236160341	236160348	-	236160346	7	8	12	1.46478	2.66353	236160135|236160141|236160140|236160144|236160139|236160142|236160069	chr1	236160141	236160433	AluSq	-
breast_epithelium_female_adult_53_years	chr1	243323309	243323333	-	243323323	4	4	11	1.34272	3.02717	243323065|243323089|243323076|243323068|243323074|243323094|243323087|243323078|243323085	chr1	243323104	243323390	AluSx1	-
breast_epithelium_female_adult_53_years	chr1	245014420	245014433	-	245014432	10	10	12	1.46478	2.85539	245014273|245014283|245014280|245014264|245014282|245014278|245014281|245014279	chr1	245014280	245014410	FLAM_C	-
breast_epithelium_female_adult_53_years	chr12	51325174	51325221	+	51325189	18	22	37	4.51641	4.03081	51325326|51325390|51325344|51325343|51325354|51325349|51325307|51325278|51325424|51325427|51325439|51325347|51325385|51325508|51325388|51325387|51325342|51325346|51325428|51325350	chr12	51325210	51325520	AluSq2	+
breast_epithelium_female_adult_53_years	chr1	25151201	25151221	+	25151201	5	5	8	0.976522	3	25151519|25151513|25151517|25151525|25151523|25151521|25151561|25151511	chr1	25151207	25151487	AluJb	+
breast_epithelium_female_adult_53_years	chr12	64267694	64267695	+	64267694	12	12	13	1.58685	2.62581	64267829|64267817|64267869|64267868|64267821|64267860|64267849	chr12	64267603	64267822	AluJb	+
breast_epithelium_female_adult_53_years	chr12	7247796	7247876	-	7247875	11	13	39	4.76054	4.58002	7247751|7247676|7247639|7247691|7247715|7247690|7247696|7247665|7247652|7247644|7247640|7247565|7247654|7247508|7247650|7247617|7247731|7247657|7247712|7247564|7247694|7247641|7247733|7247736|7247647|7247651	chr12	7247714	7248009	AluSc	-
breast_epithelium_female_adult_53_years	chr12	7264042	7264075	+	7264042	2	2	7	0.854457	2.80735	7264157|7267803|7264201|7264174|7264170|7264202|7264607	chr12	7264005	7264152	AluJb	+
breast_epithelium_female_adult_53_years	chr12	8087713	8087714	-	8087713	8	8	8	0.976522	2.75	8087547|8087514|8087511|8087512|8087457|8087524|8087586	chr12	8087586	8087724	FLAM_C	-
breast_epithelium_female_adult_53_years	chr13	111050855	111050873	+	111050855	39	40	47	5.73707	3.28465	111051060|111051049|111051062|111051057|111051058|111051063|111051059|111051068|111051069|111051077|111051075|111051061|111051065	chr13	111050724	111051069	AluSz	+
breast_epithelium_female_adult_53_years	chr13	33099203	33099299	-	33099282	4	4	15	1.83098	3.37356	33099029|33098994|33099028|33098894|33099153|33099099|33099155|33099022|33099030|33099150|33099156	chr13	33098894	33099198	AluJb	-
breast_epithelium_female_adult_53_years	chr13	41520154	41520157	-	41520154	4	4	8	0.976522	2.75	41519815|41520077|41519971|41519824|41519854|41520021|41519994	chr13	41519984	41520274	AluSx	-
breast_epithelium_female_adult_53_years	chr13	45927645	45927646	+	45927645	9	9	10	1.22065	2.50326	45927996|45927790|45927878|45927788|45927785|45927853	chr13	45927641	45927948	AluJb	+
breast_epithelium_female_adult_53_years	chr14	23313051	23313077	+	23313070	9	9	13	1.58685	3.4183	23313874|23313935|23314032|23314496|23313877|23313682|23314930|23313883|23313752|23313923|23313686	chr14	23313122	23313417	AluSx1	+
breast_epithelium_female_adult_53_years	chr14	50280610	50280647	-	50280610	2	2	10	1.22065	2.9477	50280396|50280398|50280397|50280187|50280413|50280411|50280399|50280259	chr14	50280420	50280621	AluJr	-
breast_epithelium_female_adult_53_years	chr1	46075551	46075585	+	46075584	10	10	17	2.07511	3.625	46075673|46075758|46075769|46075763|46075795|46075759|46075760|46075923|46075762|46075726|46075764|46075761|46075791	chr1	46075590	46075887	AluSx4	+
breast_epithelium_female_adult_53_years	chr14	65400858	65400924	+	65400919	4	4	14	1.70891	3.03915	65401186|65401179|65401184|65401143|65401180|65401141|65401188|65401078|65401178	chr14	65400779	65401095	AluSx	+
breast_epithelium_female_adult_53_years	chr14	68144523	68144573	-	68144572	3	3	9	1.09859	2.72548	68144167|68144290|68144117|68144333|68144306|68144291|68144309	chr14	68144496	68144578	AluSq10	-
breast_epithelium_female_adult_53_years	chr14	75496531	75496549	-	75496537	11	12	20	2.4413	3.22193	75496233|75496238|75496218|75496220|75496400|75496211|75496209|75496213|75496231|75496236|75496201	chr14	75496233	75496537	AluSp	-
breast_epithelium_female_adult_53_years	chr1	48662020	48662021	-	48662020	127	127	127	15.5023	3.88152	48661892|48661863|48661878|48661869|48661872|48661877|48661870|48661876|48661879|48661871|48661881|48661880|48661868|48661873|48661867|48661866|48661882|48661874|48661875	chr1	48661883	48662019	FLAM_C	-
breast_epithelium_female_adult_53_years	chr15	41571072	41571085	+	41571084	4	4	7	0.854457	2.58496	41572480|41571665|41571663|41571659|41571707|41571875	chr15	41571128	41571424	AluSg	+
breast_epithelium_female_adult_53_years	chr15	45005011	45005029	+	45005011	20	20	30	3.66196	3.4314	45005256|45005209|45005220|45005210|45005609|45005246|45005218|45005236|45005207|45005172|45005211|45005212|45005221|45005241	chr15	45004914	45005216	AluJr	+
breast_epithelium_female_adult_53_years	chr15	57459516	57459562	+	57459561	4	4	10	1.22065	2.72193	57459773|57459928|57459808|57459791|57459801|57459929|57459806	chr15	57459476	57459775	AluJo	+
breast_epithelium_female_adult_53_years	chr15	64434254	64434260	+	64434259	4	4	9	1.09859	2.75	64434535|64434396|64434540|64434572|64434743|64434536|64434615	chr15	64434255	64434536	AluJo	+
breast_epithelium_female_adult_53_years	chr15	64461585	64461596	-	64461585	4	4	6	0.732391	2.58496	64461433|64461434|64461432|64461424|64461435|64461429	chr15	64461432	64461731	AluSz	-
breast_epithelium_female_adult_53_years	chr15	68044728	68044746	+	68044745	9	9	12	1.46478	3.09579	68045067|68045028|68045073|68045021|68045030|68045026|68045018|68044874|68045048	chr15	68044735	68045045	AluSg4	+
breast_epithelium_female_adult_53_years	chr1	57040222	57040223	-	57040222	30	31	32	3.90609	3.44774	57040084|57040086|57040099|57040094|57040091|57040083|57040072|57040089|57040090|57040033|57040092|57040087|57040088|57040093	chr1	57039962	57040223	AluJo	-
breast_epithelium_female_adult_53_years	chr15	86281804	86281809	+	86281808	6	8	10	1.22065	2.92193	86282003|86281974|86281981|86281920|86281992|86281989|86281921|86282050	chr15	86281815	86282099	AluYb8	+
breast_epithelium_female_adult_53_years	chr16	4773577	4773612	-	4773593	4	4	11	1.34272	2.66353	4773393|4773386|4773432|4773389|4773427|4773388|4773434	chr16	4773422	4773587	AluJo	-
breast_epithelium_female_adult_53_years	chr16	48386245	48386266	+	48386245	11	11	15	1.83098	3.10689	48386402|48386362|48386561|48386552|48386553|48386401|48386359|48386557|48386560	chr16	48386274	48386553	AluSz6	+
breast_epithelium_female_adult_53_years	chr1	65512528	65512530	-	65512528	7	8	9	1.09859	2.5	65512346|65512345|65512383|65512388|65512358|65512373	chr1	65512399	65512524	AluSz	-
breast_epithelium_female_adult_53_years	chr16	78748872	78748896	+	78748895	3	3	8	0.976522	2.52164	78749024|78749046|78749057|78749047|78749016|78748993	chr16	78748900	78749029	FLAM_C	+
breast_epithelium_female_adult_53_years	chr16	84897418	84897451	+	84897436	9	9	24	2.92957	2.56926	84897597|84897591|84897635|84897601|84897636|84897632|84897631	chr16	84897293	84897589	AluSp	+
breast_epithelium_female_adult_53_years	chr16	84920121	84920153	+	84920121	4	4	16	1.95304	3.32323	84920328|84920411|84920322|84920316|84920327|84920338|84920270|84920325|84920326|84920332|84920309	chr16	84920154	84920432	AluJb	+
breast_epithelium_female_adult_53_years	chr16	84934344	84934363	+	84934350	9	9	12	1.46478	2.91398	84934635|84934646|84934629|84934642|84934644|84934631|84934639|84934637	chr16	84934378	84934619	AluJb	+
breast_epithelium_female_adult_53_years	chr17	1368338	1368423	-	1368405	8	8	27	3.29576	3.45417	1368189|1368055|1367988|1368195|1368196|1368193|1368054|1368192|1368110|1367855|1368111|1368194|1368109	chr17	1368106	1368405	AluSx	-
breast_epithelium_female_adult_53_years	chr17	25639855	25640015	+	25639932	15	15	82	10.0094	3.65975	25640579|25640125|25640113|25640120|25640117|25639959|25640157|25640244|25640245|25640122|25640272|25640251|25640160|25640161|25640115|25640238|25640116|25640247|25640143	chr17	25639823	25640081	AluSx	+
breast_epithelium_female_adult_53_years	chr17	28450982	28451010	+	28450982	2	2	8	0.976522	2.75	28451171|28451187|28451167|28451169|28451143|28451174|28451183	chr17	28451009	28451297	AluJr	+
breast_epithelium_female_adult_53_years	chr17	29905922	29905947	+	29905922	6	6	12	1.46478	2.85539	29906235|29906245|29906248|29906252|29906256|29906231|29906250|29906227	chr17	29905936	29906246	AluJb	+
breast_epithelium_female_adult_53_years	chr17	30707864	30707870	+	30707864	7	7	13	1.58685	2.77736	30707986|30708008|30707992|30707996|30708010|30707999|30708004|30708012	chr17	30707738	30708000	AluSx	+
breast_epithelium_female_adult_53_years	chr17	34941091	34941097	+	34941093	4	5	7	0.854457	2.80735	34941244|34941358|34941361|34941360|34941368|34941275|34941362	chr17	34941100	34941404	AluJr	+
breast_epithelium_female_adult_53_years	chr17	36883871	36883901	+	36883871	4	4	15	1.83098	2.55666	36884111|36884130|36884068|36884107|36883968|36884120|36884102	chr17	36883773	36884068	AluSz	+
breast_epithelium_female_adult_53_years	chr17	40470444	40470465	-	40470448	9	9	26	3.1737	2.97541	40470094|40470261|40470085|40470145|40470265|40470237|40470134|40470267|40470121|40470064	chr17	40470136	40470443	AluSx1	-
breast_epithelium_female_adult_53_years	chr17	40473108	40473114	-	40473108	4	4	10	1.22065	3.12193	40472969|40472973|40472992|40472978|40472998|40472970|40472971|40473004|40472960	chr17	40472990	40473102	FLAM_C	-
breast_epithelium_female_adult_53_years	chr17	40473979	40474005	-	40474004	3	3	7	0.854457	2.52164	40473842|40473627|40473844|40473794|40473848|40473801	chr17	40473843	40474057	AluJb	-
breast_epithelium_female_adult_53_years	chr17	40555223	40555371	-	40555249	7	7	53	6.46946	4.9866	40555114|40555002|40555090|40555117|40555129|40554818|40555087|40554866|40555053|40555131|40555128|40554814|40554789|40555001|40555213|40555127|40554940|40555116|40555055|40554869|40554867|40555120|40555123|40555024|40554937|40555064|40555062|40554815|40554813|40555126|40554816|40555124|40554972|40555007|40554858|40555025	chr17	40555091	40555246	AluJr	-
breast_epithelium_female_adult_53_years	chr17	40555931	40555989	-	40555976	7	7	24	2.92957	3.969	40555452|40555655|40555647|40555596|40555847|40555498|40555535|40555722|40555534|40555769|40555639|40555648|40555646|40555555|40555649|40555846|40555645	chr17	40555639	40555958	AluSx	-
breast_epithelium_female_adult_53_years	chr17	44119437	44119489	-	44119453	7	7	19	2.31924	3.36609	44119263|44119276|44119265|44119267|44119266|44119245|44119244|44119271|44119281|44119264|44119283|44119280	chr17	44119280	44119570	AluYf4	-
breast_epithelium_female_adult_53_years	chr17	47017114	47017122	-	47017121	3	3	7	0.854457	2.52164	47016845|47016847|47016841|47016879|47016865|47016866	chr17	47016816	47017117	AluSc8	-
breast_epithelium_female_adult_53_years	chr1	76649935	76649940	+	76649939	4	5	9	1.09859	2.72548	76650232|76650235|76650237|76650224|76650226|76650233|76650230	chr1	76649941	76650202	AluSz	+
breast_epithelium_female_adult_53_years	chr17	73384337	73384345	-	73384337	5	6	7	0.854457	2.52164	73384177|73384183|73384179|73384174|73384172|73384178	chr17	73384175	73384483	AluSz	-
breast_epithelium_female_adult_53_years	chr17	73941098	73941128	-	73941127	5	5	8	0.976522	2.75	73940986|73940947|73940991|73940997|73940978|73940988|73940985	chr17	73940828	73941126	AluSx	-
breast_epithelium_female_adult_53_years	chr17	7484918	7484955	+	7484954	4	4	16	1.95304	3.32323	7485335|7485287|7485326|7485337|7485328|7485327|7485282|7485093|7485276|7485281|7485272	chr17	7484958	7485270	AluSz	+
breast_epithelium_female_adult_53_years	chr17	78750821	78750825	+	78750824	12	13	14	1.70891	3.03915	78751019|78751020|78751046|78751082|78750932|78751069|78751045|78751070|78751064	chr17	78750756	78751059	AluSp	+
breast_epithelium_female_adult_53_years	chr1	8080803	8080838	-	8080817	3	3	8	0.976522	2.52164	8080520|8079950|8079951|8080519|8080701|8080286	chr1	8080612	8080904	AluSp	-
breast_epithelium_female_adult_53_years	chr1	8083584	8083693	-	8083611	5	5	29	3.53989	3.75416	8083289|8083293|8083283|8083226|8082858|8083288|8083492|8083493|8083334|8083286|8083332|8083284|8083287|8083239|8083285	chr1	8083333	8083638	AluJb	-
breast_epithelium_female_adult_53_years	chr1	8463725	8463731	-	8463727	7	13	15	1.83098	3.03915	8463522|8463514|8463501|8463550|8463421|8463422|8463504|8463502|8463503	chr1	8463509	8463725	AluSx1	-
breast_epithelium_female_adult_53_years	chr19	16212728	16212866	+	16212763	22	28	74	9.03283	5.17785	16213374|16212957|16213315|16212949|16213646|16213010|16213648|16213079|16213201|16213650|16212953|16213312|16213086|16213214|16213070|16213535|16213076|16212958|16213672|16212971|16212952|16213686|16213649|16213484|16212960|16213206|16212964|16213223|16212950|16213645|16212940|16213638|16212955|16212961|16213077|16213203|16213263|16213011|16212936|16213021|16213639|16213644|16213485	chr19	16212878	16213167	AluSz	+
breast_epithelium_female_adult_53_years	chr19	17002386	17002532	+	17002408	27	30	111	13.5492	4.73135	17002619|17002596|17002590|17002583|17002637|17002575|17002580|17002646|17002603|17002588|17002647|17002605|17002622|17002576|17002623|17002685|17002579|17002621|17003150|17002645|17002573|17002617|17002614|17002586|17002620|17002507|17002650|17002636|17002615|17002627|17002643|17002577|17002628|17002582|17002638|17002574|17002640|17002618|17002587|17002598	chr19	17002277	17002582	AluSx1	+
breast_epithelium_female_adult_53_years	chr1	9328153	9328187	+	9328171	3	3	18	2.19717	3.29277	9328337|9328503|9328270|9328309|9328330|9328312|9328502|9328362|9328336|9328367|9328368	chr1	9328030	9328325	AluJr	+
breast_epithelium_female_adult_53_years	chr19	49848772	49848784	-	49848783	8	8	12	1.46478	2.9183	49848579|49848576|49848564|49848583|49848582|49848580|49848538|49848589	chr19	49848597	49848910	AluJb	-
breast_epithelium_female_adult_53_years	chr1	97266048	97266071	+	97266070	6	6	11	1.34272	2.66353	97266297|97266293|97266591|97266204|97266296|97266294|97266298	chr1	97266005	97266298	AluJr	+
breast_epithelium_female_adult_53_years	chr19	8430552	8430595	+	8430573	5	5	16	1.95304	3.07782	8430761|8430747|8430767|8430751|8431237|8430738|8430744|8431234|8430884|8430737	chr19	8430554	8430722	AluJo	+
breast_epithelium_female_adult_53_years	chr20	34635122	34635181	-	34635180	3	3	10	1.22065	2.92193	34634857|34634934|34634910|34634817|34634933|34634809|34634628|34634860	chr20	34634932	34635221	AluSc	-
breast_epithelium_female_adult_53_years	chr20	35519168	35519258	-	35519195	15	15	32	3.90609	3.77621	35518869|35518799|35519045|35519128|35518666|35518860|35518864|35518982|35518848|35518863|35518867|35518854|35518876|35518862|35518801|35518865|35519020	chr20	35518867	35519179	AluSq2	-
breast_epithelium_female_adult_53_years	chr20	35520307	35520340	-	35520329	20	21	27	3.29576	3.71785	35520134|35519939|35520179|35520082|35520088|35520194|35519631|35520193|35520056|35520195|35520200|35520059|35520198|35520097|35520182	chr20	35520097	35520262	AluSx3	-
breast_epithelium_female_adult_53_years	chr20	35523434	35523441	-	35523440	6	6	9	1.09859	2.5	35523219|35523277|35523280|35523274|35523286|35523278	chr20	35523274	35523439	AluJr	-
breast_epithelium_female_adult_53_years	chr20	35542354	35542408	-	35542355	3	5	11	1.34272	2.91398	35542280|35542169|35542190|35542170|35542281|35542187|35542160|35542159	chr20	35542159	35542456	AluSz6	-
breast_epithelium_female_adult_53_years	chr20	35543057	35543121	-	35543068	13	13	32	3.90609	3.73624	35542746|35542947|35542960|35542836|35542766|35542760|35542749|35542757|35542763|35542742|35542761|35542743|35542744|35542788|35542765|35542782	chr20	35542748	35543062	AluSx1	-
breast_epithelium_female_adult_53_years	chr20	35562190	35562202	-	35562190	5	5	7	0.854457	2.52164	35562004|35562015|35562021|35562024|35562023|35562049	chr20	35561894	35562167	AluSz	-
breast_epithelium_female_adult_53_years	chr20	35563293	35563299	-	35563293	9	9	11	1.34272	2.64644	35563103|35563163|35563108|35563063|35563056|35563064|35563095	chr20	35563047	35563360	AluSq	-
breast_epithelium_female_adult_53_years	chr20	35565240	35565285	-	35565284	3	3	8	0.976522	3	35565086|35565088|35565002|35565082|35565084|35565085|35565195|35565090	chr20	35565079	35565260	AluSc	-
breast_epithelium_female_adult_53_years	chr20	45736245	45736264	+	45736259	3	3	8	0.976522	2.75	45736472|45736441|45736390|45736401|45736409|45736439|45736466	chr20	45736197	45736326	FLAM_C	+
breast_epithelium_female_adult_53_years	chr20	54942538	54942587	+	54942547	7	7	12	1.46478	2.85539	54942704|54942707|54942730|54942953|54942947|54942703|54942702|54942753	chr20	54942412	54942704	AluSz	+
breast_epithelium_female_adult_53_years	chr2	102793496	102793542	+	102793541	3	3	12	1.46478	3.4183	102793635|102793647|102793952|102793859|102793661|102793730|102794016|102793649|102794015|102793777|102793728	chr2	102793443	102793731	AluSx	+
breast_epithelium_female_adult_53_years	chr21	36226330	36226366	-	36226330	3	3	10	1.22065	2.72193	36226113|36226115|36226116|36226102|36226114|36226094|36226112	chr21	36226112	36226410	AluSz	-
breast_epithelium_female_adult_53_years	chr21	46190534	46190583	-	46190534	8	8	12	1.46478	2.62581	46190111|46190243|46190330|46190244|46189918|46190429|46190240	chr21	46190334	46190631	AluSc8	-
breast_epithelium_female_adult_53_years	chr2	159499937	159499938	+	159499937	9	9	9	1.09859	2.9477	159500250|159500248|159500251|159500246|159500239|159500142|159500249|159500240	chr2	159499940	159499999	AluJo	+
breast_epithelium_female_adult_53_years	chr2	172177921	172177946	-	172177925	5	5	9	1.09859	2.6416	172177728|172177620|172177632|172177597|172177729|172177722|172177655	chr2	172177802	172177979	AluJb	-
breast_epithelium_female_adult_53_years	chr2	202031946	202031974	+	202031970	3	3	9	1.09859	2.9477	202032251|202032088|202032209|202032338|202032140|202032416|202032083|202032255	chr2	202031954	202032249	AluJo	+
breast_epithelium_female_adult_53_years	chr2	204323726	204323757	-	204323756	3	3	10	1.22065	2.72548	204323494|204323487|204323485|204323493|204323474|204323489|204323488	chr2	204323476	204323755	AluY	-
breast_epithelium_female_adult_53_years	chr22	24968428	24968466	+	24968465	5	5	8	0.976522	2.5	24968740|24968746|24968619|24968748|24968840|24968739	chr22	24968448	24968740	AluSx4	+
breast_epithelium_female_adult_53_years	chr22	26121720	26121728	+	26121720	8	8	10	1.22065	2.52193	26121927|26121926|26121924|26121921|26121925|27100073|26121920	chr22	26121631	26121926	AluY	+
breast_epithelium_female_adult_53_years	chr2	228551293	228551436	-	228551334	16	16	44	5.37087	4.25217	228551199|228550955|228551160|228550958|228551146|228550959|228551157|228551035|228551154|228550999|228550963|228551161|228551162|228551151|228551155|228551075|228550961|228551007|228551159|228551009|228551158|228550956	chr2	228551057	228551334	AluJr	-
breast_epithelium_female_adult_53_years	chr22	28864017	28864061	-	28864030	4	4	10	1.22065	2.92193	28863914|28863918|28863808|28863911|28863916|28863876|28863145|28863915	chr22	28863754	28864060	AluJo	-
breast_epithelium_female_adult_53_years	chr22	28980124	28980136	-	28980124	5	9	11	1.34272	2.84535	28979996|28979972|28979994|28979989|28979973|28979988|28979974|28979975	chr22	28980020	28980114	AluJo	-
breast_epithelium_female_adult_53_years	chr2	229957972	229958004	-	229958003	5	5	19	2.31924	3.11583	229957845|229957826|229957830|229957799|229957848|229957650|229957844|229957800|229957824|229957754	chr2	229957838	229958139	AluSz	-
breast_epithelium_female_adult_53_years	chr2	230698166	230698168	-	230698167	4	7	7	0.854457	2.80735	230698036|230697957|230697997|230697994|230697996|230697959|230698034	chr2	230698000	230698294	AluJb	-
breast_epithelium_female_adult_53_years	chr2	238673679	238673721	+	238673701	7	7	15	1.83098	3.03915	238673914|238673912|238673913|238674005|238673920|238673996|238673919|238673871|238673950	chr2	238673622	238673922	AluSq2	+
breast_epithelium_female_adult_53_years	chr22	46111824	46111868	+	46111867	5	6	13	1.58685	3.08496	46112159|46112043|46112168|46112032|46112163|46112165|46112125|46112162|46112073	chr22	46111858	46112161	AluJr	+
breast_epithelium_female_adult_53_years	chr2	24970678	24970681	+	24970679	3	7	8	0.976522	2.52164	24970887|24971003|24970994|24971000|24970880|24970999	chr2	24970694	24971000	AluSp	+
breast_epithelium_female_adult_53_years	chr22	51147404	51147501	+	51147409	4	4	21	2.56337	2.71797	51147654|51147585|51147659|51147570|51147658|51147653|51147652|51147655	chr22	51147269	51147572	AluJb	+
breast_epithelium_female_adult_53_years	chr2	28633870	28633892	+	28633877	6	6	14	1.70891	2.62352	28634108|28634036|28634030|28634040|28634028|28634029|28634038	chr2	28633733	28634038	AluSx1	+
breast_epithelium_female_adult_53_years	chr2	44582023	44582024	-	44582023	14	14	14	1.70891	3.03915	44581719|44581715|44581722|44581721|44581716|44581718|44581714|44581717|44581720	chr2	44581717	44582015	AluSx	-
breast_epithelium_female_adult_53_years	chr2	61587208	61587209	-	61587208	22	22	23	2.8075	3.84535	61587076|61586998|61587012|61587018|61587009|61587013|61587032|61586999|61587016|61587014|61586994|61587031|61587024|61587008|61587010|61587007	chr2	61586914	61587190	AluSx1	-
breast_epithelium_female_adult_53_years	chr2	61736440	61736467	-	61736440	10	12	20	2.4413	3.24644	61736232|61736304|61736303|61736217|61736073|61736300|61736229|61736230|61736072|61736240|61736261	chr2	61736150	61736439	AluSq2	-
breast_epithelium_female_adult_53_years	chr2	9629510	9629572	-	9629547	7	8	26	3.1737	3.45949	9629119|9629268|9629322|9629321|9629262|9629298|9629261|9629263|9629259|9629258|9629296|9629257|9629260	chr2	9629388	9629510	AluSz6	-
breast_epithelium_female_adult_53_years	chr2	9664142	9664236	-	9664217	17	17	40	4.88261	3.54394	9664004|9664002|9663930|9664067|9663929|9664000|9663999|9663933|9664012|9664013|9664007|9663936|9663928|9664008|9664011	chr2	9664002	9664168	AluJr	-
breast_epithelium_female_adult_53_years	chr3	105557055	105557056	-	105557055	11	11	11	1.34272	3.27761	105556923|105556921|105556922|105556910|105556932|105556843|105556920|105556766|105556931|105556929	chr3	105556914	105557152	AluJr	-
breast_epithelium_female_adult_53_years	chr3	112936226	112936237	+	112936226	10	10	14	1.70891	3.09307	112936410|112936384|112936382|112936407|112936383|112936563|112936454|112936391|112936380	chr3	112936222	112936389	AluJb	+
breast_epithelium_female_adult_53_years	chr3	141878818	141878891	-	141878853	17	17	40	4.88261	3.58483	141878695|141878692|141878696|141878691|141878686|141878682|141878675|141878671|141878680|141878693|141878694|141878676|141878670|141878674|141878697	chr3	141878696	141878989	AluSx	-
breast_epithelium_female_adult_53_years	chr3	158419977	158419991	-	158419990	8	8	10	1.22065	2.50326	158419805|158419806|158419809|158419808|158419812|158419823	chr3	158419808	158420126	AluSc8	-
breast_epithelium_female_adult_53_years	chr3	16269821	16269848	+	16269847	4	5	14	1.70891	2.66123	16270177|16270209|16269937|16270248|16270204|16270424|16270263	chr3	16269866	16270170	AluSx	+
breast_epithelium_female_adult_53_years	chr3	172223849	172224003	-	172223860	5	5	35	4.27228	3.90845	172223711|172223631|172223614|172223641|172223592|172223610|172223642|172223612|172223613|172223611|172223687|172223639|172223635|172223682|172223384|172223615|172223637|172223710	chr3	172223515	172223813	AluSc	-
breast_epithelium_female_adult_53_years	chr3	187967031	187967040	+	187967031	4	4	7	0.854457	2.80735	187967324|187967621|187967221|187967197|187967220|187967192|187967212	chr3	187966921	187967148	AluJr	+
breast_epithelium_female_adult_53_years	chr3	188001866	188001889	+	188001866	6	6	12	1.46478	2.66353	188002087|188002081|188002168|188002080|188002078|188002069|188002094	chr3	188001897	188001941	AluYc	+
breast_epithelium_female_adult_53_years	chr3	25663154	25663171	-	25663154	4	4	9	1.09859	2.75	25662778|25662822|25662826|25662857|25662855|25662844|25662848	chr3	25662855	25663149	AluJb	-
breast_epithelium_female_adult_53_years	chr3	27405815	27405876	-	27405835	3	4	11	1.34272	2.64644	27405594|27405531|27405571|27405619|27405622|27405708|27405621	chr3	27405664	27405839	AluSx	-
breast_epithelium_female_adult_53_years	chr3	37355778	37355860	+	37355857	9	9	26	3.1737	4.20987	37356132|37356152|37356149|37356153|37356058|37356145|37356190|37356157|37356158|37356159|37356156|37356147|37356148|37356160|37356155|37356154|37356150|37356139|37356048|37356136	chr3	37355849	37356133	AluSx	+
breast_epithelium_female_adult_53_years	chr3	41247019	41247024	+	41247019	5	5	8	0.976522	2.52164	41247236|41247360|41247238|41247176|41247235|41247234	chr3	41246912	41247177	AluSx1	+
breast_epithelium_female_adult_53_years	chr3	48116312	48116322	-	48116312	4	4	8	0.976522	2.80735	48116192|48116194|48116179|48116181|48116191|48116196|48116198	chr3	48116216	48116310	AluJb	-
breast_epithelium_female_adult_53_years	chr3	49461430	49461446	-	49461433	7	8	11	1.34272	2.59491	49461279|49461276|49461256|49461277|49461280|49461274|49461263	chr3	49461276	49461583	AluSp	-
breast_epithelium_female_adult_53_years	chr3	52289096	52289159	-	52289122	8	10	27	3.29576	3.13361	52288898|52288882|52288880|52288876|52288790|52288875|52288890|52288893|52288878|52288889	chr3	52288956	52289257	AluSp	-
breast_epithelium_female_adult_53_years	chr3	5237857	5237873	+	5237857	8	8	11	1.34272	2.64644	5238182|5238034|5238155|5238157|5238039|5238145|5238041	chr3	5237859	5238141	AluSx1	+
breast_epithelium_female_adult_53_years	chr3	63909179	63909200	+	63909179	5	5	10	1.22065	2.50326	63909453|63909450|63909458|63909487|63909539|63909509	chr3	63909200	63909490	AluJb	+
breast_epithelium_female_adult_53_years	chr3	64643149	64643179	-	64643178	3	3	9	1.09859	2.9477	64643008|64643024|64643039|64642822|64643041|64642871|64643007|64643009	chr3	64643013	64643313	AluJr	-
breast_epithelium_female_adult_53_years	chr3	65970531	65970561	-	65970547	4	4	9	1.09859	2.9477	65970276|65970195|65970212|65970208|65970203|65970191|65970201|65970193	chr3	65970225	65970522	AluJb	-
breast_epithelium_female_adult_53_years	chr3	71134602	71134627	-	71134602	11	11	14	1.70891	3.23593	71134406|71134336|71134417|71134389|71134502|71134425|71134427|71134376|71134415|71134387	chr3	71134293	71134601	AluJr	-
breast_epithelium_female_adult_53_years	chr3	71347102	71347108	-	71347102	4	4	7	0.854457	2.52164	71346767|71346548|71346763|71346762|71346549|71346769	chr3	71346767	71347057	AluSx1	-
breast_epithelium_female_adult_53_years	chr3	9498512	9498552	+	9498512	2	4	11	1.34272	2.92193	9498789|9498788|9498675|9498684|9498676|9498682|9498672|9498683	chr3	9498376	9498679	AluSc	+
breast_epithelium_female_adult_53_years	chr4	109544126	109544178	+	109544177	4	4	15	1.83098	2.73957	109544499|109544498|109544513|109544497|109544501|109544344|109544500	chr4	109544206	109544513	AluSp	+
breast_epithelium_female_adult_53_years	chr4	39909344	39909361	-	39909360	5	5	9	1.09859	2.6416	39909205|39261955|39909149|39909216|39909117|39909116|39909217	chr4	39909195	39909504	AluY	-
breast_epithelium_female_adult_53_years	chr4	57326821	57326840	+	57326825	3	5	11	1.34272	2.73216	57326984|57327388|57327202|57327030|57327031|57327234|57327287	chr4	57326855	57327154	AluSx1	+
breast_epithelium_female_adult_53_years	chr4	57903741	57903765	-	57903741	11	11	15	1.83098	2.54926	57903511|57903520|57903516|57903496|57903494|57903491|57903502	chr4	57903540	57903702	AluJr	-
breast_epithelium_female_adult_53_years	chr4	773821	773898	-	773858	5	5	11	1.34272	3.09579	773697|773664|773687|773273|773758|773713|773747|773689|773699	chr4	773713	773825	FRAM	-
breast_epithelium_female_adult_53_years	chr5	148877543	148877596	-	148877560	6	6	17	2.07511	3.29277	148877080|148877354|148877386|148877074|148877282|148877357|148877081|148877342|148877344|148877395|148877256	chr5	148877385	148877693	AluSg4	-
breast_epithelium_female_adult_53_years	chr5	150560868	150560932	-	150560928	7	7	39	4.76054	3.84308	150560754|150560699|150560756|150560649|150560634|150560751|150560742|150560757|150560656|150560755|150560758|150560693|150560696|150560627|150560753|150560774|150560683|150560623	chr5	150560771	150561076	AluY	-
breast_epithelium_female_adult_53_years	chr5	171811014	171811015	-	171811014	8	8	9	1.09859	2.75	171810848|171810791|171810860|171810857|171810836|171810858|171810859	chr5	171810839	171811147	AluSc	-
breast_epithelium_female_adult_53_years	chr5	171818043	171818044	-	171818043	31	31	31	3.78402	4.04243	171817832|171817839|171817827|171817834|171817842|171817823|171817829|171817821|171817835|171817831|171817840|171817837|171817822|171817824|171817836|171817841|171817830|171817838|171817828	chr5	171817865	171818143	AluSp	-
breast_epithelium_female_adult_53_years	chr5	171835400	171835448	-	171835447	2	2	6	0.732391	2.58496	171835184|171835190|171835188|171835193|171835175|171835271	chr5	171835256	171835486	AluJb	-
breast_epithelium_female_adult_53_years	chr5	180676541	180676556	+	180676552	3	3	8	0.976522	2.75	180676714|180676702|180676693|180676710|180676696|180676713|180676723	chr5	180676412	180676693	AluJo	+
breast_epithelium_female_adult_53_years	chr5	34117003	34117010	-	34117009	6	6	8	0.976522	2.75	34116814|34116678|34116503|34116676|34116679|34116824|34116673	chr5	34116700	34116999	AluSx1	-
breast_epithelium_female_adult_53_years	chr5	34768757	34768806	+	34768790	4	4	9	1.09859	2.72548	34769109|34769104|34768987|34769110|34769105|34768947|34769106	chr5	34768813	34769106	AluSz	+
breast_epithelium_female_adult_53_years	chr5	39407481	39407486	-	39407485	7	7	10	1.22065	2.9477	39407301|39407256|39407261|39407328|39407318|39407255|39407317|39407319	chr5	39407316	39407602	AluSg4	-
breast_epithelium_female_adult_53_years	chr5	40828023	40828061	-	40828060	5	5	14	1.70891	2.55666	40826746|40822334|40827848|40827836|40827835|40827875|40827834	chr5	40827834	40827996	AluSx	-
breast_epithelium_female_adult_53_years	chr5	42993325	42993363	-	42993346	2	2	9	1.09859	2.50326	42993023|42993029|42993186|42993035|42993003|42993271	chr5	42993009	42993319	AluSx4	-
breast_epithelium_female_adult_53_years	chr5	53275843	53275878	-	53275861	4	5	13	1.58685	2.62581	53275693|53275695|53275705|53275664|53275692|53275698|53275700	chr5	53275715	53275834	AluSz	-
breast_epithelium_female_adult_53_years	chr5	54769640	54769678	-	54769677	12	12	21	2.56337	3.52193	54769498|54769432|54769496|54769443|54769495|54769497|54769494|54769491|54769500|54769439|54769493|54769492|54769502	chr5	54769500	54769792	AluJo	-
breast_epithelium_female_adult_53_years	chr5	54800933	54800963	-	54800962	8	8	14	1.70891	3.37878	54800813|54800643|54800765|54800641|54800644|54800613|54800624|54800638|54800847|54800634|54800642	chr5	54800637	54800928	AluJb	-
breast_epithelium_female_adult_53_years	chr5	82804699	82804700	+	82804699	14	14	14	1.70891	3.52164	82804902|82804887|82804894|82804892|82804891|82804939|82804945|82804906|82804897|82804904|82804896|82804893	chr5	82804661	82804880	AluJb	+
breast_epithelium_female_adult_53_years	chr5	98197471	98197511	-	98197491	3	3	10	1.22065	2.9477	98197285|98196724|98197096|98197317|98197212|98196885|98197301|98197058	chr5	98197280	98197505	AluSc8	-
breast_epithelium_female_adult_53_years	chr6	107752777	107752799	-	107752777	6	6	9	1.09859	2.72548	107752462|107752710|107752459|107752623|107752619|107752460|107752453	chr6	107752453	107752752	AluJb	-
breast_epithelium_female_adult_53_years	chr6	111022127	111022128	+	111022127	6	6	6	0.732391	2.58496	111022341|111022391|111022388|111022299|111022441|111022454	chr6	111022127	111022414	AluSg4	+
breast_epithelium_female_adult_53_years	chr6	122765237	122765670	-	122765609	21	21	209	25.5116	5.11199	122765430|122765403|122765115|122765125|122765182|122765142|122765271|122765439|122765301|122765136|122765263|122764859|122765105|122765118|122764986|122765218|122765468|122764815|122765484|122765268|122764980|122765262|122765119|122764984|122765302|122765405|122765139|122764982|122765144|122765121|122765141|122765255|122765124|122765138|122765253|122765486|122764981|122765146|122765126|122765117…	chr6	122765165	122765430	AluJb	-
breast_epithelium_female_adult_53_years	chr6	129265640	129265671	+	129265670	14	14	27	3.29576	4.06026	129265938|129265797|129265794|129265940|129266439|129265796|129265943|129265788|129265793|129265789|129265853|129265956|129265835|129265914|129265800|129265944|129265780|129265795	chr6	129265657	129265788	AluSx3	+
breast_epithelium_female_adult_53_years	chr6	129559012	129559032	+	129559020	11	12	17	2.07511	3.85217	129559230|129559301|129559329|129559194|129559323|129559198|129559239|129559203|129559330|129559162|129559166|129559159|129559161|129559204|129559186	chr6	129559021	129559330	AluSx	+
breast_epithelium_female_adult_53_years	chr6	129660985	129661027	+	129660985	3	3	10	1.22065	2.50326	129661186|129661178|129661158|129661155|129661171|129661170	chr6	129660867	129661172	AluSc	+
breast_epithelium_female_adult_53_years	chr6	129717917	129718022	+	129718000	7	7	41	5.00468	3.76491	129718213|129718226|129718231|129718227|129718255|129718245|129718218|129718223|129718242|129718224|129718216|129718246|129718214|129718239|129718240|129718233|129718215|129718229	chr6	129717919	129718164	AluJo	+
breast_epithelium_female_adult_53_years	chr6	149912201	149912241	+	149912222	6	6	14	1.70891	2.98523	149912486|149912902|149912540|149912438|149912554|149912505|149912460|149912439|149912508	chr6	149912148	149912439	AluSc	+
breast_epithelium_female_adult_53_years	chr6	157308100	157308117	+	157308100	4	5	8	0.976522	2.5	157308293|157308292|157308287|157308296|157308289|157308298	chr6	157308030	157308293	AluJb	+
breast_epithelium_female_adult_53_years	chr6	160067870	160067906	-	160067898	11	11	17	2.07511	2.58689	160067646|160067724|160067725|160067634|160067723|160067644|160067721|160067726	chr6	160067581	160067897	AluJo	-
breast_epithelium_female_adult_53_years	chr6	30460832	30460887	+	30460865	5	5	17	2.07511	3.96982	30461089|30461307|30460963|30461552|30461135|30461185|30461090|30460966|30460964|30461144|30461145|30461140|30460965|30461187|30461263|30461131	chr6	30460788	30461101	AluSc8	+
breast_epithelium_female_adult_53_years	chr6	31502002	31502014	-	31502009	4	4	10	1.22065	2.72548	31501136|31501871|31501872|31501135|31501868|31501874|31501581	chr6	31501782	31502074	AluJb	-
breast_epithelium_female_adult_53_years	chr6	34251182	34251202	-	34251182	4	5	8	0.976522	2.52164	34250782|34250945|34250789|34250778|34250795|34250784	chr6	34250974	34251279	AluSg	-
breast_epithelium_female_adult_53_years	chr6	35043889	35043913	+	35043901	3	3	6	0.732391	2.58496	35044055|35044380|35044204|35044203|35044102|35044052	chr6	35043920	35044201	AluY	+
breast_epithelium_female_adult_53_years	chr6	35618546	35618575	-	35618556	9	10	16	1.95304	2.78064	35618418|35618413|35618414|35618415|35618416|35618417|35618372|35618375	chr6	35618241	35618551	AluSz	-
breast_epithelium_female_adult_53_years	chr6	35622448	35622505	-	35622486	4	4	14	1.70891	3.18201	35622337|35622350|35622340|35622328|35622330|35622274|35622338|35622273|35622348|35622339	chr6	35622392	35622579	AluSp	-
breast_epithelium_female_adult_53_years	chr6	35651053	35651162	-	35651112	5	6	31	3.78402	4.19582	35650910|35650860|35650792|35650918|35650933|35650916|35650929|35650941|35650945|35650951|35650926|35650861|35650931|35650922|35650914|35650859|35650942|35650937|35650864|35650920|35650924	chr6	35650955	35651234	AluJo	-
breast_epithelium_female_adult_53_years	chr6	35652243	35652303	-	35652256	2	2	10	1.22065	3.12193	35651989|35586949|35652117|35652055|35652082|35652091|35652058|35652076|35651918	chr6	35651958	35652254	AluJb	-
breast_epithelium_female_adult_53_years	chr6	42854413	42854414	+	42854413	11	11	11	1.34272	2.73216	42854748|42854745|42854750|42854777|42854747|42854749|42854650	chr6	42854451	42854749	AluSc	+
breast_epithelium_female_adult_53_years	chr7	100734704	100734736	+	100734713	5	5	17	2.07511	3.69012	100734830|100734911|100734900|100734899|100734910|100735040|100734892|100734908|100734895|100734902|100735015|100734866|100734863|100734906	chr7	100734726	100735037	AluSq2	+
breast_epithelium_female_adult_53_years	chr7	107582334	107582359	-	107582340	6	11	19	2.31924	2.51579	107582216|107582101|107582100|107582166|107582191|107582215|107582184	chr7	107582100	107582410	AluSp	-
breast_epithelium_female_adult_53_years	chr7	121714986	121715110	-	121715036	4	4	28	3.41783	3.82486	121714797|121714865|121714901|121714916|121714867|121714490|121714892|121714893|121714864|121714849|121714871|121714799|121714866|121714800|121714868|121714806	chr7	121714903	121715076	AluJb	-
breast_epithelium_female_adult_53_years	chr7	121715178	121715233	-	121715216	5	5	14	1.70891	3.52164	121714797|121714932|121714870|121714927|121715076|121715078|121714864|121715011|121714796|121714934|121714996|121714931	chr7	121715114	121715227	AluJb	-
breast_epithelium_female_adult_53_years	chr7	140258759	140258782	-	140258759	10	10	17	2.07511	3.02864	140258591|140258601|140258606|140258596|140258614|140258587|140258589|140258615|140258607	chr7	140258599	140258722	AluSx	-
breast_epithelium_female_adult_53_years	chr7	40068979	40069023	+	40069020	28	30	45	5.49294	3.32731	40069214|40069225|40069223|40069208|40069222|40069209|40069229|40069224|40069270|40069227|40069210|40069211	chr7	40069040	40069219	AluSc	+
breast_epithelium_female_adult_53_years	chr7	5366267	5366274	-	5366267	5	5	8	0.976522	2.52164	5366076|5366062|5366085|5366057|5366065|5366061	chr7	5366063	5366243	AluJb	-
breast_epithelium_female_adult_53_years	chr7	65422247	65422321	+	65422320	12	13	34	4.15022	3.47655	65422463|65422576|65422509|65422638|65422460|65422553|65422639|65422454|65422736|65422500|65422462|65422455|65422461|65422480	chr7	65422185	65422481	AluSx	+
breast_epithelium_female_adult_53_years	chr7	76778948	76778949	+	76778948	7	7	8	0.976522	2.52164	76779094|76779099|76779103|76779101|76779098|76779100	chr7	76778800	76779101	AluSx1	+
breast_epithelium_female_adult_53_years	chr7	80285083	80285131	+	80285083	9	9	33	4.02815	3.29153	80285581|80285266|80285268|80285271|80285302|80285261|80285263|80285259|80285270|80285260|80285247|80285262	chr7	80284985	80285266	AluJb	+
breast_epithelium_female_adult_53_years	chr7	80308012	80308062	+	80308020	8	8	15	1.83098	3.00624	80308301|80308445|80308170|80308133|80308309|80308132|80308202|80308308|80308305	chr7	80307894	80308170	AluSc	+
breast_epithelium_female_adult_53_years	chr7	95219406	95219459	-	95219434	4	4	12	1.46478	2.58496	95219171|95219208|95219163|95219164|95219203|95219132|95219165	chr7	95219254	95219375	AluJr	-
breast_epithelium_female_adult_53_years	chr7	99635435	99635455	+	99635435	3	4	9	1.09859	2.9477	99635653|99635657|99635652|99635578|99635661|99635558|99635654|99635655	chr7	99635358	99635654	AluSx3	+
breast_epithelium_female_adult_53_years	chr7	99636480	99636497	+	99636480	6	6	8	0.976522	2.80735	99636637|99636958|99636629|99636631|99636634|99636949|99636635	chr7	99636336	99636631	AluSc8	+
breast_epithelium_female_adult_53_years	chr7	99636750	99636759	+	99636758	3	3	7	0.854457	2.52164	99636953|99636958|99636950|99636988|99636949|99637144	chr7	99636652	99636958	AluSx1	+
breast_epithelium_female_adult_53_years	chr8	100301120	100301142	+	100301141	4	4	9	1.09859	2.75	100301336|100301300|100301285|100301297|100301301|100301304|100301289	chr8	100301143	100301261	AluJo	+
breast_epithelium_female_adult_53_years	chr8	121060000	121060013	+	121060000	4	4	7	0.854457	2.52164	121060283|121060287|121060284|121060281|121060282|121060280	chr8	121060002	121060285	AluSx	+
breast_epithelium_female_adult_53_years	chr8	131152485	131152506	-	131152485	5	5	8	0.976522	2.5	131152278|131152281|131152284|131152277|131152283|131152279	chr8	131152266	131152573	AluJo	-
breast_epithelium_female_adult_53_years	chr8	13126686	13126687	-	13126686	8	8	8	0.976522	2.5	13126382|13126383|13126368|13126492|13126499|13126381	chr8	13126381	13126681	AluY	-
breast_epithelium_female_adult_53_years	chr8	17426227	17426249	+	17426248	2	2	7	0.854457	2.80735	17426548|17426549|17426328|17426571|17426333|17426741|17426362	chr8	17426186	17426495	AluJo	+
breast_epithelium_female_adult_53_years	chr8	37613387	37613395	+	37613387	3	3	7	0.854457	2.52164	37613530|37613509|37613515|37614049|37613510|37613505	chr8	37613425	37613716	AluSx1	+
breast_epithelium_female_adult_53_years	chr8	38589462	38589524	+	38589473	5	5	20	2.4413	3.88418	38589703|38589641|38589672|38589656|38589694|38589674|38589678|38589682|38589657|38589713|38589673|38589669|38589677|38589687|38589645|38589676	chr8	38589347	38589659	AluSx1	+
breast_epithelium_female_adult_53_years	chr8	75759511	75759574	+	75759526	3	3	10	1.22065	2.84644	75759768|75759740|75759746|75759720|75759744|75759695|75759693|75759697	chr8	75759398	75759695	AluSp	+
breast_epithelium_female_adult_53_years	chr8	93054347	93054377	-	93054347	25	25	33	4.02815	3.6245	93054048|93054084|93054087|93054079|93054046|93054045|93054050|93054085|93054047|93054092|93054202|93054044|93054208|93054097|93054090|93054049	chr8	93054047	93054347	AluSx1	-
breast_epithelium_female_adult_53_years	chr9	132590194	132590260	-	132590233	6	6	20	2.4413	2.77095	132589910|132590001|132589908|132590019|132589909|132589913|132590020|132589838	chr9	132590056	132590371	AluSp	-
breast_epithelium_female_adult_53_years	chr9	134299782	134299792	+	134299782	18	18	20	2.4413	2.76596	134299962|134300098|134300086|134300078|134300097|134300096|134300094|134300079|134300093	chr9	134299791	134300096	AluSz	+
breast_epithelium_female_adult_53_years	chr9	19111258	19111293	-	19111266	5	8	16	1.95304	2.65564	19110989|19111029|19111028|19111151|19110936|19111047|19111010	chr9	19111059	19111343	AluSz	-
breast_epithelium_female_adult_53_years	chr9	19117815	19117818	-	19117817	16	18	19	2.31924	3.2391	19117621|19117612|19117615|19117610|19117549|19117616|19117620|19117614|19117709|19117596|19117501	chr9	19117614	19117914	AluSc8	-
breast_epithelium_female_adult_53_years	chr9	19120331	19120385	-	19120352	7	7	32	3.90609	4.1313	19120181|19120064|19120182|19120168|19120089|19120167|19119986|19120180|19120052|19120187|19120185|19119977|19120065|19120049|19120178|19119892|19120183|19120192|19119894|19120216|19120177	chr9	19120062	19120331	AluJb	-
breast_epithelium_female_adult_53_years	chr9	19125608	19125631	-	19125608	3	3	8	0.976522	2.52164	19125382|19125083|19125517|19125385|19125516|19125387	chr9	19125498	19125579	AluJr	-
breast_epithelium_female_adult_53_years	chr9	34681623	34681624	+	34681623	7	7	8	0.976522	2.52164	34681824|34681813|34681828|34681818|34682272|34681840	chr9	34681525	34681832	AluSx	+
breast_epithelium_female_adult_53_years	chr9	6934197	6934198	+	6934197	11	11	12	1.46478	2.84535	6934372|6934400|6934376|6934385|6934392|6934373|6934383|6934401	chr9	6934199	6934491	AluY	+
breast_epithelium_female_adult_53_years	chrX	123044417	123044436	+	123044417	9	9	16	1.95304	2.6494	123044621|123044629|123044622|123044736|123044847|123044745|123044644|123044795	chrX	123044437	123044745	AluY	+
breast_epithelium_female_adult_53_years	chrX	123176579	123176580	+	123176579	10	10	10	1.22065	2.84644	123176791|123176789|123176788|123176786|123176758|123176759|123176908|123176757	chrX	123176580	123176883	AluSx	+
breast_epithelium_female_adult_53_years	chrX	153276699	153276765	-	153276699	4	4	21	2.56337	3.74899	153276523|153276085|153276323|153276452|153276438|153276539|153276460|153276201|153276629|153276202|153276646|153276543|153276628|153276436|153276437	chrX	153276542	153276840	AluJb	-
breast_epithelium_female_adult_53_years	chrX	16779650	16779683	+	16779658	3	3	9	1.09859	2.9477	16779842|16779834|16780223|16779830|16779879|16779825|16779824|16780147	chrX	16779689	16779800	AluSx	+
breast_epithelium_female_adult_53_years	chrX	2406361	2406380	-	2406379	5	5	7	0.854457	2.52164	2406089|2406218|2406076|2406075|2406220|2406026	chrX	2406226	2406515	AluSq2	-
breast_epithelium_female_adult_53_years	chrX	24210703	24210718	+	24210703	5	5	7	0.854457	2.52164	24210980|24210821|24211025|24211027|24211033|24211026	chrX	24210742	24211027	AluJb	+
breast_epithelium_female_adult_53_years	chrX	40451615	40451635	+	40451615	5	6	9	1.09859	2.5	40451759|40451770|40451781|40451761|40451754|40451774	chrX	40451624	40451760	FLAM_C	+
breast_epithelium_female_adult_53_years	chrX	48436184	48436376	+	48436284	52	52	128	15.6244	3.61577	48436547|48436503|48436623|48436472|48436469|48436612|48436664|48436504|48436498|48436476|48436542|48436621|48436643|48436526|48436474|48436473|48436389|48436470|48436502|48436499|48436551|48436501|48436543|48436505|48436487|48436500|48436475|48436544|48436480	chrX	48436270	48436480	AluSx	+
breast_epithelium_female_adult_53_years	chrX	54589024	54589065	+	54589051	27	27	42	5.12674	3.26043	54589240|54589246|54589245|54589248|54589243|54589253|54589239|54589249|54589280|54589252|54589241|54589242|54589244|54589250	chrX	54589076	54589242	AluSx	+
breast_epithelium_female_adult_53_years	chrX	73067358	73067468	-	73067370	7	7	50	6.10326	3.60689	73066982|73067232|73066979|73067228|73067219|73066980|73067229|73067272|73066974|73066975|73066977|73066680|73067115|73067193|73066976|73067226|73066978	chrX	73067239	73067354	FLAM_C	-
breast_epithelium_female_adult_53_years	chrX	73496488	73496492	-	73496491	14	14	16	1.95304	3.45282	73496193|73496280|73496323|73496264|73496326|73496295|73496196|73496296|73496269|73496172|73496200|73496300	chrX	73496209	73496486	AluSg	-
bronchus_fibroblast_of_lung	chr10	6199487	6199491	-	6199487	5	5	7	0.454661	2.52164	6199316|6199315|6199101|6199312|6199170|6199108	chr10	6199191	6199488	AluY	-
bronchus_fibroblast_of_lung	chr10	69524852	69524853	+	69524852	7	7	7	0.454661	2.52164	69525001|69525060|69525198|69525027|69525025|69525014	chr10	69524852	69525156	AluY	+
bronchus_fibroblast_of_lung	chr10	75726393	75726401	+	75726400	6	6	13	0.844371	2.56545	75726554|75726711|75726538|75726555|75726677|75726682|75726683	chr10	75726400	75726683	AluSx	+
bronchus_fibroblast_of_lung	chr10	75789169	75789170	-	75789169	8	8	8	0.519613	3	75788905|75788958|75788975|75789037|75788863|75789002|75788998|75788987	chr10	75788875	75789170	AluY	-
bronchus_fibroblast_of_lung	chr1	115248276	115248338	-	115248337	13	14	26	1.68874	3.26927	115248089|115247501|115248086|115248100|115247249|115247245|115248102|115247394|115247743|115247746|115248090	chr1	115248250	115248409	AluSx3	-
bronchus_fibroblast_of_lung	chr1	145398713	145398720	+	145398719	44	45	51	3.31253	2.96553	145399086|145399078|145399079|145399076|145399088|145399074|145399094|145399077|145399098|145399080|145399075|145399095	chr1	145398719	145399016	AluSq	+
bronchus_fibroblast_of_lung	chr11	47236000	47236036	+	47236035	3	3	15	0.974274	2.98523	47236700|47236704|47236710|47236699|47236695|47236713|47236711|47237179|47236720	chr11	47236061	47236338	AluJo	+
bronchus_fibroblast_of_lung	chr11	47448534	47448535	+	47448534	7	7	7	0.454661	2.80735	47448790|47448732|47448727|47448696|47448786|47448789|47448788	chr11	47448535	47448822	AluY	+
bronchus_fibroblast_of_lung	chr11	47953626	47953627	+	47953626	63	63	64	4.1569	4.29187	47953925|47953958|47953905|47953800|47953799|47953797|47953929|47953794|47953957|47953917|47953804|47953789|47953918|47953916|47953801|47953947|47953956|47953926|47953904|47953796|47953927|47953922|47953798	chr11	47953627	47953937	AluSg	+
bronchus_fibroblast_of_lung	chr1	155278157	155278158	-	155278157	21	21	21	1.36398	3.63041	155277826|155277983|155277809|155277801|155277979|155277968|155277804|155277779|155277973|155277802|155277770|155277768|155277761|155277766	chr1	155277846	155278157	AluSx3	-
bronchus_fibroblast_of_lung	chr1	161085152	161085153	-	161085152	14	14	14	0.909322	2.89629	161084951|161084985|161084949|161084860|161084982|161084984|161084977|161084966	chr1	161084850	161085153	AluSx1	-
bronchus_fibroblast_of_lung	chr11	61567738	61567790	-	61567748	5	8	21	1.36398	2.94639	61567560|61567188|61567141|61567518|61567189|61567562|61567140|61567158|61567353	chr11	61567659	61567831	AluJb	-
bronchus_fibroblast_of_lung	chr11	86227731	86227733	-	86227731	13	19	21	1.36398	3.18137	86227423|86227412|86227418|86227427|86227422|86227406|86227421|86227429|86227408|86227424	chr11	86227447	86227732	AluSx3	-
bronchus_fibroblast_of_lung	chr12	120379018	120379019	+	120379018	40	40	40	2.59806	3.01306	120379316|120379333|120379339|120379328|120379348|120379360|120379338|120379346|120379344|120379347	chr12	120379020	120379316	AluSq	+
bronchus_fibroblast_of_lung	chr12	123868158	123868159	-	123868158	14	14	14	0.909322	2.6645	123867899|123867900|123867897|123867894|123867903|123867711|123867907	chr12	123867846	123868159	AluSp	-
bronchus_fibroblast_of_lung	chr1	246932881	246932882	+	246932881	15	15	15	0.974274	3.24022	246933055|246933059|246933213|246933214|246933209|246933179|246933207|246933057|246933176|246933178|246933054	chr1	246932882	246933190	AluSx1	+
bronchus_fibroblast_of_lung	chr12	53781029	53781034	-	53781033	4	4	8	0.519613	2.5	53780750|53780724|53780725|53780870|53780762|53780743	chr12	53780724	53781034	AluSx3	-
bronchus_fibroblast_of_lung	chr13	76291217	76291218	+	76291217	10	10	10	0.649516	2.92193	76291389|76291547|76291542|76291546|76291513|76291545|76291548|76291351	chr13	76291217	76291517	AluY	+
bronchus_fibroblast_of_lung	chr13	95736078	95736079	-	95736078	22	22	23	1.49389	3.04491	95735704|95735706|95735705|95735708|95735711|95735707|95735738|95735712|95735709|95735885	chr13	95735768	95736076	AluSz	-
bronchus_fibroblast_of_lung	chr14	23399941	23399946	+	23399941	74	75	80	5.19613	3.78844	23400212|23400227|23400223|23400208|23400215|23400277|23400224|23400334|23400214|23400217|23400105|23400195|23400213|23400211|23400216|23400225|23400220|23400218|23400210|23400194|23400219	chr14	23399941	23400208	AluSq	+
bronchus_fibroblast_of_lung	chr1	45095225	45095226	+	45095225	12	12	12	0.779419	3.08496	45095392|45095388|45095447|45095451|45095446|45095402|45095390|45095399|45095426	chr1	45095227	45095359	AluSz6	+
bronchus_fibroblast_of_lung	chr14	68144521	68144601	-	68144572	8	8	33	2.1434	3.34779	68144119|68144028|68144156|68144289|68144121|68144303|68144160|68143792|68144158|68143794|68144301|68144309|68143791	chr14	68144496	68144578	AluSq10	-
bronchus_fibroblast_of_lung	chr1	48662020	48662021	-	48662020	293	294	294	19.0958	3.95208	48661863|48661878|48661869|48661872|48661877|48661870|48661876|48661879|48661871|48661881|48661880|48661868|48661873|48661867|48661866|48661882|48661874|48661875	chr1	48661883	48662019	FLAM_C	-
bronchus_fibroblast_of_lung	chr15	32993582	32993585	-	32993582	16	16	21	1.36398	3.49923	32993243|32993406|32993385|32993207|32993290|32993208|32993319|32993205|32993220|32993391|32993242|32993408|32993212	chr15	32993284	32993582	AluY	-
bronchus_fibroblast_of_lung	chr15	75867612	75867613	-	75867612	9	9	9	0.584564	2.6416	75867418|75867425|75867387|75867385|75867384|75867429|75867421	chr15	75867323	75867613	AluY	-
bronchus_fibroblast_of_lung	chr15	80303582	80303585	+	80303584	10	12	12	0.779419	2.68872	80303891|80303893|80303970|80303886|80303793|80304100|80303888	chr15	80303584	80303888	AluSq2	+
bronchus_fibroblast_of_lung	chr16	84915383	84915384	-	84915383	15	15	15	0.974274	3.1899	84915215|84915000|84915223|84914976|84914975|84915221|84915217|84915219|84915218|84915222	chr16	84915246	84915381	AluJo	-
bronchus_fibroblast_of_lung	chr17	15193340	15193341	+	15193340	9	9	9	0.584564	2.72548	15193472|15193604|15193592|15193599|15193593|15193594|15193703	chr17	15193340	15193632	AluSc8	+
bronchus_fibroblast_of_lung	chr17	30424486	30424487	-	30424486	8	8	8	0.519613	2.5	30424233|30424228|30424219|30424229|30424352|30424230	chr17	30424175	30424487	AluY	-
bronchus_fibroblast_of_lung	chr17	40555837	40555892	-	40555838	2	3	7	0.454661	2.52164	40555385|40555722|40555129|40555532|40555646|40555513	chr17	40555639	40555958	AluSx	-
bronchus_fibroblast_of_lung	chr18	64289290	64289291	+	64289290	747	747	748	48.5838	2.64844	64289478|64289456|64289462|64289471|64289457|64289468|64289469|64385603|64289474|64289477|64289446|64623117|64385593|64289458|64289470|64289476|64289473|64289467|64289475|64289448|64289454|64289464|64289459|64289481|64289465|64289472|64289466|64623118|64289463	chr18	64289291	64289427	FLAM_C	+
bronchus_fibroblast_of_lung	chr19	50640583	50640588	-	50640583	31	31	37	2.40321	3.57886	50640369|50640361|50640400|50640370|50640364|50640362|50640368|50640359|50640431|50640398|50640365|50640363|50640360|50640366	chr19	50640452	50640584	AluYa5	-
bronchus_fibroblast_of_lung	chr1	9819638	9819639	-	9819638	27	27	27	1.75369	2.89419	9819364|9819370|9819369|9819363|9819366|9819367|9819497|9819365	chr1	9819328	9819639	AluY	-
bronchus_fibroblast_of_lung	chr2	11478067	11478068	-	11478067	8	8	8	0.519613	2.5	11477762|11477767|11477764|11477768|11477765|11477759	chr2	11477758	11478068	AluSz	-
bronchus_fibroblast_of_lung	chr2	170676764	170676765	-	170676764	59	59	59	3.83214	3.40027	170676451|170676560|170676456|170676455|170676460|170676461|170676409|170676579|170676570|170676457|170676572|170676563|170676458|170676454|170676459	chr2	170676480	170676765	AluSp	-
bronchus_fibroblast_of_lung	chr2	236236632	236236637	+	236236632	5	5	7	0.454661	2.52164	236236935|236236938|236236827|236236940|236236823|236236941	chr2	236236632	236236918	AluSc	+
bronchus_fibroblast_of_lung	chr2	25198587	25198588	+	25198587	12	12	12	0.779419	2.62581	25198776|25198892|25198760|25198888|25198894|25198772|25198893	chr2	25198588	25198895	AluSc8	+
bronchus_fibroblast_of_lung	chr2	45186094	45186095	-	45186094	7	7	7	0.454661	2.52164	45185734|45185732|45185783|45185733|45185731|45185782	chr2	45185761	45186095	AluSz	-
bronchus_fibroblast_of_lung	chr2	86731777	86731807	-	86731795	2	2	9	0.584564	2.6416	86731068|86731480|86731064|86731483|86731463|86731069|86731067	chr2	86731634	86731769	FLAM_C	-
bronchus_fibroblast_of_lung	chr3	128399477	128399482	-	128399481	67	67	90	5.84564	4.26809	128399136|128399290|128399138|128399266|128399213|128399291|128399148|128399212|128399016|128399141|128399214|128399145|128399144|128398878|128399142|128399323|128399176|128399140|128399135|128399154|128399149|128399211|128399014|128399139|128399268|128399283	chr3	128399192	128399478	AluSg	-
bronchus_fibroblast_of_lung	chr3	190142437	190142439	+	190142438	80	90	94	6.10545	4.44231	190142603|190142777|190142587|190142573|190142765|190142581|190142769|190142746|190142600|190142589|190142773|190142745|190142767|190142718|190142770|190142583|190142588|190142768|190142766|190142599|190142584|190142764|190142582|190142772|190142586|190142774|190142591|190142749|190142720|190142771|190142585|190142569	chr3	190142438	190142703	AluSx1	+
bronchus_fibroblast_of_lung	chr3	23989326	23989327	+	23989326	82	82	82	5.32603	4.19569	23989574|23989570|23989582|23989583|23989588|23989568|23989565|23989579|23989581|23989571|23989573|23989585|23989576|23989509|23989503|23989577|23989505|23989569|23989578|23989432|23989592|23989584|23989575|23989572|23989567	chr3	23989326	23989623	AluSq2	+
bronchus_fibroblast_of_lung	chr4	174365423	174365424	-	174365423	44	44	44	2.85787	4.63523	174364990|174365115|174365117|174365102|174365104|174365105|174365101|174365123|174365114|174365121|174365134|174365119|174365124|174364831|174365122|174365129|174364970|174365113|174365137|174365110|174365108|174365112|174365041|174365127|174365109|174365088|174365107|174365111	chr4	174365139	174365424	AluSq2	-
bronchus_fibroblast_of_lung	chr5	180258568	180258639	-	180258611	76	84	222	14.4193	5.05772	180257953|180257955|180257911|180257907|180257691|180257948|180258415|180257702|180258412|180257697|180257983|180257439|180257971|180257999|180258103|180257951|180258143|180257908|180257982|180258118|180257957|180258140|180258102|180258406|180257766|180258100|180257696|180257656|180257440|180258380|180258142|180257597|180257699|180257956|180257950|180257693|180258411|180258099|180258226|180258485…	chr5	180258415	180258530	AluSq2	-
bronchus_fibroblast_of_lung	chr5	42993340	42993347	-	42993340	7	9	12	0.779419	2.66353	42992175|42992916|42993035|42974647|42992915|42992920|42992914	chr5	42993009	42993319	AluSx4	-
bronchus_fibroblast_of_lung	chr5	76035084	76035089	+	76035084	23	23	26	1.68874	4.08505	76035339|76035341|76035373|76035344|76035381|76035355|76035621|76035346|76035331|76035290|76035309|76035340|76035248|76035372|76035220|76035407|76035338|76035384	chr5	76035084	76035385	AluSq2	+
bronchus_fibroblast_of_lung	chr5	79922875	79922957	-	79922918	9	9	58	3.76719	3.36434	79922641|79922637|79922631|79922643|79922639|79922632|79922644|79922356|79922673|79922676|79922642|79922638|79922674|79922517	chr5	79922755	79922876	FLAM_A	-
bronchus_fibroblast_of_lung	chr6	111022127	111022128	+	111022127	45	45	45	2.92282	4.3201	111022615|111022487|111022298|111022491|111022297|111022389|111022557|111022786|111022605|111022458|111022351|111022565|111614297|111022260|111022387|111022380|111022566|111022567|111022792|111022438|111022653|111022483|111022620|111022464|111022344|111022568|111022461	chr6	111022127	111022414	AluSg4	+
bronchus_fibroblast_of_lung	chr6	122765249	122765333	-	122765330	3	3	16	1.03923	3.5	122764582|122764862|122765119|122765124|122765148|122765140|122765136|122764723|122764581|122765123|122765134|122765138	chr6	122765165	122765430	AluJb	-
bronchus_fibroblast_of_lung	chr6	155424575	155424576	+	155424575	25	25	25	1.62379	4.13366	155424798|155424796|155424794|155424777|155424786|155424708|155424784|155424781|155424770|155424768|155424800|155424771|155424775|155424676|155424772|155424778|155424811|155424779|155424769	chr6	155424575	155424879	AluSx	+
bronchus_fibroblast_of_lung	chr6	21163899	21163904	+	21163899	28	28	33	2.1434	3.11564	21164162|21164145|21164154|21164151|21164147|21164001|21164144|21164143|21164152|21164146|21164149	chr6	21163899	21164210	AluSq2	+
bronchus_fibroblast_of_lung	chr6	26273743	26273744	+	26273743	25	25	26	1.68874	2.86268	26274006|26274030|26274032|26274033|26273891|26273883|26274031|26274011|26273919	chr6	26273743	26274032	AluSq2	+
bronchus_fibroblast_of_lung	chr6	27859007	27859008	-	27859007	15	15	16	1.03923	2.87291	27858717|27858721|27858723|27858684|27858690|27858722|27858724|27858753	chr6	27858720	27859021	AluSz	-
bronchus_fibroblast_of_lung	chr6	2903050	2903051	-	2903050	31	31	32	2.07845	2.6541	2902744|2902645|2902745|2902752|2902742|2902739|2902746|2902753|2902741|2902743|2902915	chr6	2902742	2903051	AluSz	-
bronchus_fibroblast_of_lung	chr6	30593544	30593566	+	30593561	6	6	19	1.23408	2.75506	30593886|30593887|30593895|30593888|30593975|30593897|30593985|30593907	chr6	30593595	30593888	AluJb	+
bronchus_fibroblast_of_lung	chr6	41321536	41321537	+	41321536	6	6	6	0.38971	2.58496	41321836|41321834|41321827|41321833|41321842|41321832	chr6	41321539	41321836	AluSg	+
bronchus_fibroblast_of_lung	chr7	1238778	1238779	-	1238778	21	21	21	1.36398	3.39139	1238422|1238428|1238440|1238419|1238436|1238431|1238425|1238429|1238437|1238433|1238444|1238416	chr7	1238493	1238779	AluSx	-
bronchus_fibroblast_of_lung	chr7	28846783	28846784	+	28846783	71	71	72	4.67651	3.14048	28847122|28847120|28847124|28847117|28847123|28847126|28847044|28847127|28847125|28847119|28847121|28847118	chr7	28846783	28847080	AluSg4	+
bronchus_fibroblast_of_lung	chr7	73512894	73512908	+	73512894	15	15	17	1.10418	3.13072	73513067|73513099|73513040|73513132|73513128|73513129|73513109|73513126|73513130|73513110	chr7	73512894	73513141	AluSx	+
bronchus_fibroblast_of_lung	chr7	99756492	99756496	+	99756495	5	5	8	0.519613	2.5	99756794|99756792|99756804|99756791|99756797|99756793	chr7	99756495	99756797	AluJr	+
bronchus_fibroblast_of_lung	chr8	125233136	125233137	+	125233136	12	12	12	0.779419	2.9183	125233319|125233273|125233321|125233314|125233315|125233318|125233323|125233313|125233325	chr8	125233138	125233444	AluSz	+
bronchus_fibroblast_of_lung	chr8	141656256	141656257	+	141656256	165	166	170	11.0418	3.40011	141656475|141656432|141656435|141656447|141656437|141656430|141656434|141656442|141656462|141656433|141656524|141656446|141656440|141656455|141656439|141656444|141656429|141656360|141656436|141656431|141656465|141656443	chr8	141656256	141656558	AluY	+
bronchus_fibroblast_of_lung	chr8	144536879	144536880	-	144536879	24	24	25	1.62379	4.13684	144536737|144536617|144536758|144536742|144536532|144536457|144536479|144536731|144536480|144536680|144536456|144536377|144536519|144536669|144536692|144536757|144536675|144536654|144536706	chr8	144536572	144536880	AluY	-
bronchus_fibroblast_of_lung	chr9	102733995	102734018	+	102733995	6	6	8	0.519613	2.75	102734477|102734481|102734480|102734283|102734483|102734482|102734478	chr9	102734020	102734286	AluJr	+
bronchus_fibroblast_of_lung	chr9	110396490	110396491	+	110396490	86	86	86	5.58584	3.40099	110396778|110396780|110396689|110396761|110396767|110396781|110396776|110396777|110396774|110396779|110396782|110396766|110396834|110396768|110396775|110396770|110396773|110396769	chr9	110396490	110396769	AluSx4	+
bronchus_fibroblast_of_lung	chr9	116247663	116247669	-	116247668	13	13	15	0.974274	3.1899	116247494|116247505|116247493|116247473|116247491|116247497|116247492|116247477|116247324|116247531	chr9	116247374	116247668	AluY	-
bronchus_fibroblast_of_lung	chr9	117083197	117083198	+	117083197	12	12	12	0.779419	2.85539	117083496|117083527|117083373|117083371|117083374|117083491|117083532|117083372	chr9	117083198	117083508	AluSz	+
bronchus_fibroblast_of_lung	chrX	41159709	41159710	+	41159709	33	33	33	2.1434	3.67214	41160041|41160029|41160036|41160026|41160025|41160019|41160040|41160031|41160021|41160035|41159846|41160024|41160023|41160030|41160042	chrX	41159710	41160019	AluSz	+
bronchus_fibroblast_of_lung	chrX	48436272	48436302	+	48436273	2	3	12	0.779419	2.75163	48436505|48436502|48436474|48436500|48436493|48436503|48436662|48436501	chrX	48436270	48436480	AluSx	+
bronchus_fibroblast_of_lung	chrX	9879962	9879979	+	9879962	6	6	12	0.779419	3.25163	9880268|9880243|9880186|9880266|9880182|9880179|9880181|9880270|9880264|9880188	chrX	9879984	9880147	AluJo	+
camera_type_eye_female_fetal_24_weeks	chr10	13179054	13179108	+	13179063	2	2	10	1.1933	2.64644	13179315|13179550|13179296|13179294|13179562|13179297|13179307	chr10	13178997	13179298	AluSz	+
camera_type_eye_female_fetal_24_weeks	chr10	17655309	17655324	-	17655323	6	6	9	1.07397	2.50326	17655109|17655107|17655111|17655125|17655105|17655123	chr10	17655146	17655267	FLAM_A	-
camera_type_eye_female_fetal_24_weeks	chr10	29942047	29942060	-	29942059	5	5	10	1.1933	2.64644	29941916|29941931|29941924|29941937|29941921|29941923|29941930	chr10	29941929	29942058	FLAM_C	-
camera_type_eye_female_fetal_24_weeks	chr10	95239058	95239089	-	95239058	13	13	15	1.78995	3.24022	95238883|95238885|95238880|95238879|95238896|95238903|95238822|95238902|95238898|95238897	chr10	95238895	95239042	AluSx3	-
camera_type_eye_female_fetal_24_weeks	chr1	103372294	103372317	-	103372294	8	9	10	1.1933	2.72548	103371953|103372085|103372187|103372086|103372213|103372186|103371965	chr1	103371968	103372255	AluJb	-
camera_type_eye_female_fetal_24_weeks	chr1	103487540	103487562	-	103487561	10	10	25	2.98325	3.4906	103487446|103481296|103487305|103487400|103487304|103487379|103487395|103487396|103487320|103487399|103487300|103487318|103487295	chr1	103487391	103487711	AluY	-
camera_type_eye_female_fetal_24_weeks	chr11	122093982	122094045	-	122094007	3	4	14	1.67062	3.18201	122093799|122093813|122093807|122093792|122093804|122093820|122093818|122093810|122093787|122093811	chr11	122093814	122094121	AluSz	-
camera_type_eye_female_fetal_24_weeks	chr11	27476761	27476818	-	27476793	4	5	15	1.78995	2.97356	27476585|27476586|27476588|27476591|27476589|27476576|27476581|27476587	chr11	27476590	27476773	AluJo	-
camera_type_eye_female_fetal_24_weeks	chr11	57542679	57542744	+	57542679	9	9	26	3.10258	2.62451	57542828|57542825|57542833|57542832|57542818|57542838|57542836|57542881	chr11	57542694	57542818	FLAM_A	+
camera_type_eye_female_fetal_24_weeks	chr1	164685803	164685850	+	164685803	3	3	9	1.07397	3.16993	164685951|164685950|164685949|164685959|164685961|164685955|164685954|164685952|164685957	chr1	164685809	164685922	FLAM_C	+
camera_type_eye_female_fetal_24_weeks	chr11	65207803	65207927	+	65207829	4	5	28	3.34124	3.66899	65208044|65207990|65208074|65207961|65208055|65208047|65208067|65207981|65208049|65208068|65208040|65208048|65208051|65208076|65208052	chr11	65207794	65207955	AluJr	+
camera_type_eye_female_fetal_24_weeks	chr1	16662977	16663007	-	16663003	6	6	15	1.78995	2.92323	16662845|16662850|16662844|16662853|16662831|16662767|16662829|16662752|16662843	chr1	16662844	16663150	AluSz	-
camera_type_eye_female_fetal_24_weeks	chr1	205432200	205432239	-	205432214	8	9	19	2.26727	3.0761	205431800|205431684|205432066|205431686|205431698|205431696|205431702|205431688|205432070	chr1	205432110	205432291	AluSp	-
camera_type_eye_female_fetal_24_weeks	chr12	1334318	1334349	+	1334318	3	3	10	1.1933	2.9477	1334628|1334631|1334616|1334619|1334653|1334635|1334659|1334633	chr12	1334344	1334613	AluJr	+
camera_type_eye_female_fetal_24_weeks	chr13	101110417	101110467	+	101110446	9	9	14	1.67062	3.52164	101110706|101110569|101110712|101110640|101110691|101110697|101110719|101110615|101110638|101110714|101110716|101110645	chr13	101110446	101110549	AluJo	+
[truncated: 43,893 more rows]

## Sheet: RAMPAGE_Alu (hg38)
Sample	Peak Chrom	Peak Start	Peak End	Peak Strand	Peak Site	Height	Peak Reads	Total Reads	RPM	Entropy	Positions of R2	Alu Chrom	Alu Start	Alu End	Alu Name	Alu Strand
[truncated: 44,254 more rows]
