# Supplementary material for: Genome-wide analysis of polymerase III–transcribed Alu elements suggests cell-type–specific enhancer function
Source: HighWire-hosted journal article supplement (doi:10.1101/gr.249789.119), 2019-08-14
Supplement: Supplemental_Table_S3.xlsx [file Supplemental_Table_S3.xlsx]

## Sheet: Table Legend
Supplemental Table S3. Anatomy classification of tissues for RAMPAGE data.

## Sheet: Anatomy Classification
Sample	UBERON ID	Organ
omental fat pad female adult (51 years)	UBERON:0010414	adipose tissue
omental fat pad female adult (53 years)	UBERON:0010414	adipose tissue
omental fat pad male adult (37 years)	UBERON:0010414	adipose tissue
omental fat pad male adult (54 years)	UBERON:0010414	adipose tissue
subcutaneous adipose tissue female adult (51 years)	UBERON:0002190	adipose tissue
subcutaneous adipose tissue female adult (53 years)	UBERON:0002190	adipose tissue
subcutaneous adipose tissue male adult (37 years)	UBERON:0002190	adipose tissue
adrenal gland female adult (51 years)	UBERON:0002369	adrenal gland
adrenal gland female adult (53 years)	UBERON:0002369	adrenal gland
adrenal gland male adult (37 years)	UBERON:0002369	adrenal gland
adrenal gland male adult (54 years)	UBERON:0002369	adrenal gland
thoracic aorta male adult (37 years)	UBERON:0001515	blood vessel
cerebellum female fetal (19 weeks) and female fetal (37 weeks)	UBERON:0002037	brain
diencephalon female fetal (20 weeks) and male fetal (22 weeks)	UBERON:0001894	brain
frontal cortex female fetal (20 weeks) and male fetal (22 weeks)	UBERON:0001870	brain
occipital lobe female fetal (20 weeks) and male fetal (22 weeks)	UBERON:0002021	brain
parietal lobe female fetal (24 weeks) and male fetal (22 weeks)	UBERON:0001872	brain
temporal lobe female fetal (20 weeks) and female fetal (24 weeks)	UBERON:0001871	brain
breast epithelium female adult (51 years)	UBERON:0008367	breast
breast epithelium female adult (53 years)	UBERON:0008367	breast
esophagus muscularis mucosa female adult (51 years)	UBERON:0004648	esophagus
esophagus muscularis mucosa female adult (53 years)	UBERON:0004648	esophagus
esophagus muscularis mucosa male adult (37 years)	UBERON:0004648	esophagus
esophagus muscularis mucosa male adult (54 years)	UBERON:0004648	esophagus
esophagus squamous epithelium female adult (51 years)	UBERON:0006920	esophagus
esophagus squamous epithelium female adult (53 years)	UBERON:0006920	esophagus
esophagus squamous epithelium male adult (37 years)	UBERON:0006920	esophagus
esophagus squamous epithelium male adult (54 years)	UBERON:0006920	esophagus
umbilical cord male fetal (20 weeks) and male fetal (31 week)	UBERON:0002331	extrafetalnic component
camera-type eye female fetal (24 weeks)	UBERON:0000019	eye
ovary female adult (51 years)	UBERON:0000992	gonad
ovary female adult (53 years)	UBERON:0000992	gonad
testis male adult (37 years)	UBERON:0000473	gonad
testis male adult (54 years)	UBERON:0000473	gonad
heart female fetal (19 weeks) and female fetal (28 weeks)	UBERON:0000948	heart
heart left ventricle female adult (51 years)	UBERON:0002084	heart
heart left ventricle female adult (53 years)	UBERON:0002084	heart
heart male adult (34 years)	UBERON:0000948	heart
right atrium auricular region female adult (51 years)	UBERON:0006631	heart
right atrium auricular region female adult (53 years)	UBERON:0006631	heart
Peyer's patch female adult (51 years)	UBERON:0001211	intestine
Peyer's patch female adult (53 years)	UBERON:0001211	intestine
Peyer's patch male adult (37 years)	UBERON:0001211	intestine
Peyer's patch male adult (54 years)	UBERON:0001211	intestine
sigmoid colon female adult (51 years)	UBERON:0001159	intestine
sigmoid colon female adult (53 years)	UBERON:0001159	intestine
sigmoid colon male adult (37 years)	UBERON:0001159	intestine
sigmoid colon male adult (54 years)	UBERON:0001159	intestine
transverse colon female adult (51 years)	UBERON:0001157	intestine
transverse colon female adult (53 years)	UBERON:0001157	intestine
transverse colon male adult (37 years)	UBERON:0001157	intestine
transverse colon male adult (54 years)	UBERON:0001157	intestine
metanephros female fetal (20 weeks) and female fetal (24 weeks)	UBERON:0000081	kidney
gastrocnemius medialis female adult (51 years)	UBERON:0011907	limb
gastrocnemius medialis female adult (53 years)	UBERON:0011907	limb
gastrocnemius medialis male adult (37 years)	UBERON:0011907	limb
liver female fetal (20 weeks) and male fetal (22 weeks)	UBERON:0002107	liver
liver male adult (32 years)	UBERON:0002107	liver
right lobe of liver female adult (53 years) (1)	UBERON:0001114	liver
right lobe of liver female adult (53 years) (2)	UBERON:0001114	liver
lung female fetal (20 weeks) and female fetal (24 weeks)	UBERON:0002048	lung
upper lobe of left lung female adult (51 years)	UBERON:0008952	lung
upper lobe of left lung female adult (53 years)	UBERON:0008952	lung
upper lobe of left lung male adult (37 years)	UBERON:0008952	lung
upper lobe of left lung male adult (54 years)	UBERON:0008952	lung
skeletal muscle tissue female fetal (19 weeks) and male fetal (22 weeks)	UBERON:0001134	musculature of body
tibial nerve female adult (51 years)	UBERON:0001323	nerve
tibial nerve female adult (53 years)	UBERON:0001323	nerve
tibial nerve male adult (37 years)	UBERON:0001323	nerve
body of pancreas female adult (51 years)	UBERON:0001150	pancreas
body of pancreas female adult (53 years)	UBERON:0001150	pancreas
prostate gland male adult (37 years)	UBERON:0002367	prostate gland
prostate gland male adult (54 years)	UBERON:0002367	prostate gland
lower leg skin female adult (51 years)	UBERON:0004264	skin of body
lower leg skin female adult (53 years)	UBERON:0004264	skin of body
skin of body female fetal (24 weeks) and male fetal (22 weeks)	UBERON:0002097	skin of body
suprapubic skin female adult (51 years)	UBERON:0036149	skin of body
suprapubic skin female adult (53 years)	UBERON:0036149	skin of body
suprapubic skin male adult (37 years)	UBERON:0036149	skin of body
suprapubic skin male adult (54 years)	UBERON:0036149	skin of body
spinal cord female fetal (24 weeks) and male fetal (22 weeks)	UBERON:0002240	spinal cord
spleen female adult (51 years)	UBERON:0002106	spleen
spleen female adult (53 years)	UBERON:0002106	spleen
spleen male adult (37 years)	UBERON:0002106	spleen
spleen male adult (54 years)	UBERON:0002106	spleen
gastroesophageal sphincter female adult (51 years)	UBERON:0004550	stomach
gastroesophageal sphincter female adult (53 years)	UBERON:0004550	stomach
gastroesophageal sphincter male adult (37 years)	UBERON:0004550	stomach
gastroesophageal sphincter male adult (54 years)	UBERON:0004550	stomach
stomach female adult (51 years)	UBERON:0000945	stomach
stomach female adult (53 years)	UBERON:0000945	stomach
stomach female fetal (40 weeks) and male fetal (36 weeks)	UBERON:0000945	stomach
stomach male adult (37 years)	UBERON:0000945	stomach
stomach male adult (54 years)	UBERON:0000945	stomach
thyroid gland female adult (51 years)	UBERON:0002046	thyroid gland
thyroid gland female adult (53 years)	UBERON:0002046	thyroid gland
thyroid gland female fetal (37 weeks) and female fetal (40 weeks)	UBERON:0002046	thyroid gland
thyroid gland male adult (37 years)	UBERON:0002046	thyroid gland
thyroid gland male adult (54 years)	UBERON:0002046	thyroid gland
tongue female fetal (20 weeks) and female fetal (24 weeks)	UBERON:0001723	tongue
urinary bladder female fetal (20 weeks) and female fetal (24 weeks)	UBERON:0001255	urinary bladder
uterus female adult (53 years)	UBERON:0000995	uterus
uterus female fetal (24 weeks) and female fetal (28 weeks)	UBERON:0000995	uterus
vagina female adult (53 years)	UBERON:0000996	vagina
