# Supplementary material for: Genome-wide analysis of polymerase III–transcribed Alu elements suggests cell-type–specific enhancer function
Source: HighWire-hosted journal article supplement (doi:10.1101/gr.249789.119), 2019-08-14
Supplement: Supplemental_Table_S4.xlsx [file Supplemental_Table_S4.xlsx]

## Sheet: Table Legend
Supplemental Table S4. Evolutionary classification of expressed Alu elements.

## Sheet: Alu Branch
Chrom	Start	End	Strand	Name	Primate Genomes	Branch
chr10	100023477	100023787	-	AluSg7	hg19|panTro5|gorGor3|ponAbe2|rheMac8	B0
chr10	101152466	101152751	+	AluSz	hg19|panTro5|gorGor3|ponAbe2|rheMac8	B0
chr10	101424726	101425037	+	AluJb	hg19|panTro5|gorGor3|ponAbe2|rheMac8	B0
chr10	101505333	101505627	+	AluSc5	hg19|panTro5|gorGor3|ponAbe2|rheMac8	B0
chr10	101555174	101555454	+	AluSq2	hg19|panTro5|gorGor3|ponAbe2|rheMac8	B0
chr10	101556288	101556471	+	AluSx	hg19|panTro5|gorGor3|ponAbe2|rheMac8	B0
chr10	101663680	101663817	-	AluJb	hg19|panTro5|gorGor3|ponAbe2|rheMac8	B0
chr10	101700648	101700940	-	AluSx1	hg19|panTro5|gorGor3|ponAbe2|rheMac8	B0
chr10	101701227	101701524	-	AluSp	hg19|panTro5|gorGor3|ponAbe2|rheMac8	B0
chr10	102285001	102285315	-	AluSz	hg19|panTro5|gorGor3|ponAbe2|rheMac8	B0
chr10	102699152	102699450	+	AluSz	hg19|panTro5|gorGor3|ponAbe2|rheMac8	B0
chr10	102764082	102764375	+	AluSz	hg19|panTro5|gorGor3|ponAbe2|rheMac8	B0
chr10	102865841	102866127	+	AluSq	hg19|panTro5|gorGor3|ponAbe2|rheMac8	B0
chr10	103063836	103063993	-	AluJb	hg19|panTro5|gorGor3|ponAbe2|rheMac8	B0
chr10	103215616	103215740	+	AluSx	hg19|panTro5|gorGor3|ponAbe2|rheMac8	B0
chr10	103269642	103269919	+	AluSg	hg19|panTro5|gorGor3|ponAbe2|rheMac8	B0
chr10	103279471	103279774	+	AluSp	hg19|panTro5|gorGor3|ponAbe2|rheMac8	B0
chr10	103287227	103287506	+	AluJb	hg19|panTro5|gorGor3|ponAbe2|rheMac8	B0
chr10	103349662	103349841	+	AluJb	hg19|panTro5|gorGor3|ponAbe2|rheMac8	B0
chr10	103381002	103381299	+	AluJo	hg19|panTro5|gorGor3|ponAbe2|rheMac8	B0
chr10	103413597	103413896	+	AluSc	hg19|panTro5|gorGor3|ponAbe2|rheMac8	B0
chr10	103438175	103438483	-	AluY	hg19|panTro5|gorGor3|ponAbe2|rheMac8	B0
chr10	103551430	103551747	-	AluJb	hg19|panTro5|gorGor3|ponAbe2|rheMac8	B0
chr10	103556320	103556643	-	AluSz	hg19|panTro5|gorGor3|ponAbe2|rheMac8	B0
chr10	103559636	103559927	-	AluSx	hg19|panTro5|gorGor3|ponAbe2|rheMac8	B0
chr10	103612637	103612947	-	AluSq2	hg19|panTro5|gorGor3|ponAbe2|rheMac8	B0
chr10	103684121	103684411	-	AluY	hg19|panTro5|gorGor3|ponAbe2|rheMac8	B0
chr10	103824594	103824718	-	AluJr	hg19|panTro5|gorGor3|ponAbe2|rheMac8	B0
chr10	103903075	103903376	+	AluSg4	hg19|panTro5|gorGor3|ponAbe2|rheMac8	B0
chr10	103905340	103905650	+	AluY	hg19|panTro5|gorGor3|ponAbe2|rheMac8	B0
chr10	103929452	103929749	+	AluY	hg19|panTro5|gorGor3|ponAbe2|rheMac8	B0
chr10	104039603	104039887	+	AluJo	hg19|panTro5|gorGor3|ponAbe2|rheMac8	B0
chr10	104193028	104193268	-	AluJb	hg19|panTro5|gorGor3|ponAbe2|rheMac8	B0
chr10	104213187	104213467	+	AluJb	hg19|panTro5|gorGor3|ponAbe2|rheMac8	B0
chr10	104237809	104238120	+	AluSx1	hg19|panTro5|gorGor3|ponAbe2|rheMac8	B0
chr10	104496629	104496945	+	AluSp	hg19|panTro5|gorGor3|ponAbe2|rheMac8	B0
chr10	104522679	104522987	+	AluJb	hg19|panTro5|gorGor3|ponAbe2|rheMac8	B0
chr10	104547062	104547361	+	AluJb	hg19|panTro5|gorGor3|ponAbe2|rheMac8	B0
chr10	104586682	104586849	-	AluJb	hg19|panTro5|gorGor3|ponAbe2|rheMac8	B0
chr10	104587147	104587284	-	AluJb	hg19|panTro5|gorGor3|ponAbe2|rheMac8	B0
chr10	104588655	104588921	+	AluSx	hg19|panTro5|gorGor3|ponAbe2|rheMac8	B0
chr10	104661796	104661975	+	AluJo	hg19|panTro5|gorGor3|ponAbe2|rheMac8	B0
chr10	104661977	104662269	+	AluSz	hg19|panTro5|gorGor3|ponAbe2|rheMac8	B0
chr10	104848146	104848443	-	AluSp	hg19|panTro5|gorGor3|ponAbe2|rheMac8	B0
chr10	104868602	104868905	-	AluSx1	hg19|panTro5|gorGor3|ponAbe2|rheMac8	B0
chr10	104921779	104922066	-	AluSc	hg19|panTro5|gorGor3|ponAbe2|rheMac8	B0
chr10	104926399	104926709	-	AluJr4	hg19|panTro5|gorGor3|ponAbe2|rheMac8	B0
chr10	104926771	104927074	-	AluSx1	hg19|panTro5|gorGor3|ponAbe2|rheMac8	B0
chr10	104930283	104930583	-	AluJb	hg19|panTro5|gorGor3|ponAbe2|rheMac8	B0
chr10	104937291	104937499	-	AluJr4	hg19|panTro5|gorGor3|ponAbe2|rheMac8	B0
chr10	10516123	10516248	+	AluJo	hg19|panTro5|gorGor3|ponAbe2|rheMac8	B0
chr10	105207891	105208201	-	AluSx1	hg19|panTro5|gorGor3|ponAbe2|rheMac8	B0
chr10	105348421	105348718	+	AluSc5	hg19|panTro5|gorGor3|ponAbe2|rheMac8	B0
chr10	105368419	105368523	-	AluJo	hg19|panTro5|gorGor3|ponAbe2|rheMac8	B0
chr10	10538871	10539185	+	AluSz6	hg19|panTro5|gorGor3|ponAbe2|rheMac8	B0
chr10	10541560	10541834	+	AluSg	hg19|panTro5|gorGor3|ponAbe2|rheMac8	B0
chr10	10571367	10571674	+	AluSg	hg19|panTro5|gorGor3|ponAbe2|rheMac8	B0
chr10	10588788	10589076	+	AluSx	hg19|panTro5|gorGor3|ponAbe2|rheMac8	B0
chr10	106041895	106042011	+	AluSz6	hg19|panTro5|gorGor3|ponAbe2|rheMac8	B0
chr10	106080293	106080575	-	AluSz	hg19|panTro5|gorGor3|ponAbe2|rheMac8	B0
chr10	106096367	106096463	-	AluJr	hg19|panTro5|gorGor3|ponAbe2|rheMac8	B0
chr10	10623710	10623998	+	AluSg	hg19|panTro5|gorGor3|ponAbe2|rheMac8	B0
chr10	10726424	10726724	+	AluJb	hg19|panTro5|gorGor3|ponAbe2|rheMac8	B0
chr10	108825270	108825407	-	AluJb	hg19|panTro5|gorGor3|ponAbe2|rheMac8	B0
chr10	108829121	108829433	-	AluSq	hg19|panTro5|gorGor3|ponAbe2|rheMac8	B0
chr10	1091412	1091700	-	AluSx	hg19|panTro5|gorGor3|ponAbe2|rheMac8	B0
chr10	109555045	109555280	-	AluJo	hg19|panTro5|gorGor3|ponAbe2|rheMac8	B0
chr10	109614371	109614671	-	AluSx1	hg19|panTro5|gorGor3|ponAbe2|rheMac8	B0
chr10	109668941	109669246	-	AluSx	hg19|panTro5|gorGor3|ponAbe2|rheMac8	B0
chr10	1097822	1098110	-	AluSg	hg19|panTro5|gorGor3|ponAbe2|rheMac8	B0
chr10	1099672	1099852	-	AluJo	hg19|panTro5|gorGor3|ponAbe2|rheMac8	B0
chr10	111764231	111764366	-	AluSc	hg19|panTro5|gorGor3|ponAbe2|rheMac8	B0
chr10	11178283	11178610	+	AluSx	hg19|panTro5|gorGor3|ponAbe2|rheMac8	B0
chr10	111874865	111875161	+	AluSp	hg19|panTro5|gorGor3|ponAbe2|rheMac8	B0
chr10	112068284	112068609	-	AluSx1	hg19|panTro5|gorGor3|ponAbe2|rheMac8	B0
chr10	112172036	112172324	+	AluSx	hg19|panTro5|gorGor3|ponAbe2|rheMac8	B0
chr10	112265905	112266209	+	AluJr	hg19|panTro5|gorGor3|ponAbe2|rheMac8	B0
chr10	1122701	1122956	+	AluSc8	hg19|panTro5|gorGor3|ponAbe2|rheMac8	B0
chr10	112293454	112293761	+	AluSx	hg19|panTro5|gorGor3|ponAbe2|rheMac8	B0
chr10	112356765	112356916	+	AluJb	hg19|panTro5|gorGor3|ponAbe2|rheMac8	B0
chr10	11238342	11238635	+	AluJr	hg19|panTro5|gorGor3|ponAbe2|rheMac8	B0
chr10	11238640	11238928	+	AluSg	hg19|panTro5|gorGor3|ponAbe2|rheMac8	B0
chr10	112424644	112424932	-	AluJr	hg19|panTro5|gorGor3|ponAbe2|rheMac8	B0
chr10	112425595	112425743	+	AluJb	hg19|panTro5|gorGor3|ponAbe2|rheMac8	B0
chr10	112449881	112450185	+	AluJr4	hg19|panTro5|gorGor3|ponAbe2|rheMac8	B0
chr10	112474725	112475032	+	AluSx1	hg19|panTro5|gorGor3|ponAbe2|rheMac8	B0
chr10	112545178	112545333	+	AluSx3	hg19|panTro5|gorGor3|ponAbe2|rheMac8	B0
chr10	112549174	112549419	-	AluJb	hg19|panTro5|gorGor3|ponAbe2|rheMac8	B0
chr10	112648732	112649003	+	AluSx4	hg19|panTro5|gorGor3|ponAbe2|rheMac8	B0
chr10	112650903	112651184	+	AluSz6	hg19|panTro5|gorGor3|ponAbe2|rheMac8	B0
chr10	112666990	112667298	+	AluJb	hg19|panTro5|gorGor3|ponAbe2|rheMac8	B0
chr10	112732352	112732604	+	AluJb	hg19|panTro5|gorGor3|ponAbe2|rheMac8	B0
chr10	11281744	11282022	+	AluSq2	hg19|panTro5|gorGor3|ponAbe2|rheMac8	B0
chr10	11339651	11339968	+	AluSx	hg19|panTro5|gorGor3|ponAbe2|rheMac8	B0
chr10	11354621	11354925	+	AluSc	hg19|panTro5|gorGor3|ponAbe2|rheMac8	B0
chr10	11363482	11363675	+	AluJb	hg19|panTro5|gorGor3|ponAbe2|rheMac8	B0
chr10	113902724	113903021	-	AluSz	hg19|panTro5|gorGor3|ponAbe2|rheMac8	B0
chr10	114141444	114141650	+	AluSx4	hg19|panTro5|gorGor3|ponAbe2|rheMac8	B0
chr10	114160814	114160994	+	AluSx	hg19|panTro5|gorGor3|ponAbe2|rheMac8	B0
chr10	114412198	114412498	+	AluJb	hg19|panTro5|gorGor3|ponAbe2|rheMac8	B0
chr10	114459310	114459597	+	AluSg	hg19|panTro5|gorGor3|ponAbe2|rheMac8	B0
chr10	114739233	114739541	+	AluSz	hg19|panTro5|gorGor3|ponAbe2|rheMac8	B0
chr10	114751006	114751295	+	AluY	hg19|panTro5|gorGor3|ponAbe2|rheMac8	B0
chr10	114770490	114770787	+	AluJb	hg19|panTro5|gorGor3|ponAbe2|rheMac8	B0
chr10	114844368	114844688	+	AluSz6	hg19|panTro5|gorGor3|ponAbe2|rheMac8	B0
chr10	115537602	115537764	+	AluJr4	hg19|panTro5|gorGor3|ponAbe2|rheMac8	B0
chr10	115615225	115615393	-	AluSx	hg19|panTro5|gorGor3|ponAbe2|rheMac8	B0
chr10	115881560	115881870	-	AluJb	hg19|panTro5|gorGor3|ponAbe2|rheMac8	B0
chr10	115883609	115883909	-	AluJr	hg19|panTro5|gorGor3|ponAbe2|rheMac8	B0
chr10	116051754	116052049	+	AluSq	hg19|panTro5|gorGor3|ponAbe2|rheMac8	B0
chr10	116197066	116197373	-	AluSx1	hg19|panTro5|gorGor3|ponAbe2|rheMac8	B0
chr10	116198007	116198319	-	AluJb	hg19|panTro5|gorGor3|ponAbe2|rheMac8	B0
chr10	116200209	116200375	-	AluJb	hg19|panTro5|gorGor3|ponAbe2|rheMac8	B0
chr10	116205525	116205830	-	AluJb	hg19|panTro5|gorGor3|ponAbe2|rheMac8	B0
chr10	116210182	116210500	-	AluSz	hg19|panTro5|gorGor3|ponAbe2|rheMac8	B0
chr10	116217021	116217329	-	AluSz	hg19|panTro5|gorGor3|ponAbe2|rheMac8	B0
chr10	116230600	116230952	-	AluJb	hg19|panTro5|gorGor3|ponAbe2|rheMac8	B0
chr10	116234143	116234438	-	AluY	hg19|panTro5|gorGor3|ponAbe2|rheMac8	B0
chr10	116237494	116237780	-	AluSx4	hg19|panTro5|gorGor3|ponAbe2|rheMac8	B0
chr10	11623975	11624264	-	AluSq2	hg19|panTro5|gorGor3|ponAbe2|rheMac8	B0
chr10	116243031	116243335	-	AluJb	hg19|panTro5|gorGor3|ponAbe2|rheMac8	B0
chr10	116244140	116244441	-	AluSx1	hg19|panTro5|gorGor3|ponAbe2|rheMac8	B0
chr10	116271133	116271423	-	AluSz	hg19|panTro5|gorGor3|ponAbe2|rheMac8	B0
chr10	116409612	116409913	-	AluSg	hg19|panTro5|gorGor3|ponAbe2|rheMac8	B0
chr10	116446376	116446685	-	AluJo	hg19|panTro5|gorGor3|ponAbe2|rheMac8	B0
chr10	116485532	116485806	-	AluJb	hg19|panTro5|gorGor3|ponAbe2|rheMac8	B0
chr10	116508406	116508730	-	AluJr	hg19|panTro5|gorGor3|ponAbe2|rheMac8	B0
chr10	116634258	116634562	-	AluSq	hg19|panTro5|gorGor3|ponAbe2|rheMac8	B0
chr10	116787642	116787937	-	AluSx	hg19|panTro5|gorGor3|ponAbe2|rheMac8	B0
chr10	117992556	117992853	+	AluSz	hg19|panTro5|gorGor3|ponAbe2|rheMac8	B0
chr10	118353185	118353496	+	AluSx1	hg19|panTro5|gorGor3|ponAbe2|rheMac8	B0
chr10	118358484	118358812	+	AluSq2	hg19|panTro5|gorGor3|ponAbe2|rheMac8	B0
chr10	118387604	118387914	+	AluJr	hg19|panTro5|gorGor3|ponAbe2|rheMac8	B0
chr10	118387997	118388324	+	AluY	hg19|panTro5|gorGor3|ponAbe2|rheMac8	B0
chr10	118391084	118391362	+	AluSz	hg19|panTro5|gorGor3|ponAbe2|rheMac8	B0
chr10	118407750	118408022	+	AluSx	hg19|panTro5|gorGor3|ponAbe2|rheMac8	B0
chr10	11862677	11862958	-	AluSx	hg19|panTro5|gorGor3|ponAbe2|rheMac8	B0
chr10	11906580	11906886	-	AluSz	hg19|panTro5|gorGor3|ponAbe2|rheMac8	B0
chr10	119187846	119188156	-	AluY	hg19|panTro5|gorGor3|ponAbe2|rheMac8	B0
chr10	119246740	119247040	-	AluSx	hg19|panTro5|gorGor3|ponAbe2|rheMac8	B0
chr10	119248008	119248306	-	AluSx	hg19|panTro5|gorGor3|ponAbe2|rheMac8	B0
chr10	12009545	12009853	-	AluSq2	hg19|panTro5|gorGor3|ponAbe2|rheMac8	B0
chr10	12013249	12013550	-	AluSp	hg19|panTro5|gorGor3|ponAbe2|rheMac8	B0
chr10	12040391	12040534	-	AluJb	hg19|panTro5|gorGor3|ponAbe2|rheMac8	B0
chr10	120824216	120824517	-	AluSx	hg19|panTro5|gorGor3|ponAbe2|rheMac8	B0
chr10	120831940	120832266	-	AluSz	hg19|panTro5|gorGor3|ponAbe2|rheMac8	B0
chr10	120950178	120950485	+	AluSz	hg19|panTro5|gorGor3|ponAbe2|rheMac8	B0
chr10	120980383	120980681	+	AluSz6	hg19|panTro5|gorGor3|ponAbe2|rheMac8	B0
chr10	120986796	120987094	+	AluSz6	hg19|panTro5|gorGor3|ponAbe2|rheMac8	B0
chr10	120987642	120987881	+	AluJb	hg19|panTro5|gorGor3|ponAbe2|rheMac8	B0
chr10	120987917	120988153	+	AluJr	hg19|panTro5|gorGor3|ponAbe2|rheMac8	B0
chr10	120989715	120989826	+	AluJb	hg19|panTro5|gorGor3|ponAbe2|rheMac8	B0
chr10	120990174	120990365	+	AluJb	hg19|panTro5|gorGor3|ponAbe2|rheMac8	B0
chr10	121014284	121014579	+	AluSx1	hg19|panTro5|gorGor3|ponAbe2|rheMac8	B0
chr10	121071016	121071313	+	AluSz	hg19|panTro5|gorGor3|ponAbe2|rheMac8	B0
chr10	121331695	121331988	-	AluSx1	hg19|panTro5|gorGor3|ponAbe2|rheMac8	B0
chr10	121526333	121526645	+	AluSx1	hg19|panTro5|gorGor3|ponAbe2|rheMac8	B0
chr10	121588120	121588363	+	AluJb	hg19|panTro5|gorGor3|ponAbe2|rheMac8	B0
chr10	12162936	12163237	+	AluSx1	hg19|panTro5|gorGor3|ponAbe2|rheMac8	B0
chr10	12236878	12237173	+	AluSx	hg19|panTro5|gorGor3|ponAbe2|rheMac8	B0
chr10	122639891	122640179	+	AluSz	hg19|panTro5|gorGor3|ponAbe2|rheMac8	B0
chr10	122706935	122707076	-	AluSx	hg19|panTro5|gorGor3|ponAbe2|rheMac8	B0
chr10	123245962	123246257	-	AluSc5	hg19|panTro5|gorGor3|ponAbe2|rheMac8	B0
chr10	123268996	123269296	-	AluSq	hg19|panTro5|gorGor3|ponAbe2|rheMac8	B0
chr10	123272381	123272687	-	AluSq2	hg19|panTro5|gorGor3|ponAbe2|rheMac8	B0
chr10	123288622	123288923	-	AluSz	hg19|panTro5|gorGor3|ponAbe2|rheMac8	B0
chr10	123341433	123341743	-	AluSx1	hg19|panTro5|gorGor3|ponAbe2|rheMac8	B0
chr10	123848355	123848644	+	AluJb	hg19|panTro5|gorGor3|ponAbe2|rheMac8	B0
chr10	123849779	123850090	+	AluY	hg19|panTro5|gorGor3|ponAbe2|rheMac8	B0
chr10	123856559	123856880	+	AluJo	hg19|panTro5|gorGor3|ponAbe2|rheMac8	B0
chr10	123879146	123879463	+	AluSx	hg19|panTro5|gorGor3|ponAbe2|rheMac8	B0
chr10	123891254	123891562	+	AluSx1	hg19|panTro5|gorGor3|ponAbe2|rheMac8	B0
chr10	123897742	123898047	+	AluSq2	hg19|panTro5|gorGor3|ponAbe2|rheMac8	B0
chr10	123916356	123916634	+	AluJb	hg19|panTro5|gorGor3|ponAbe2|rheMac8	B0
chr10	123938116	123938403	+	AluJb	hg19|panTro5|gorGor3|ponAbe2|rheMac8	B0
chr10	123942450	123942748	+	AluSz6	hg19|panTro5|gorGor3|ponAbe2|rheMac8	B0
chr10	123978246	123978555	+	AluSx3	hg19|panTro5|gorGor3|ponAbe2|rheMac8	B0
chr10	123979270	123979580	+	AluSx1	hg19|panTro5|gorGor3|ponAbe2|rheMac8	B0
chr10	123991209	123991374	+	AluJr	hg19|panTro5|gorGor3|ponAbe2|rheMac8	B0
chr10	12400076	12400249	+	AluJb	hg19|panTro5|gorGor3|ponAbe2|rheMac8	B0
chr10	12400263	12400553	+	AluSx	hg19|panTro5|gorGor3|ponAbe2|rheMac8	B0
chr10	12407770	12408061	+	AluSz	hg19|panTro5|gorGor3|ponAbe2|rheMac8	B0
chr10	124137969	124138284	+	AluJb	hg19|panTro5|gorGor3|ponAbe2|rheMac8	B0
chr10	124150011	124150239	+	AluJr	hg19|panTro5|gorGor3|ponAbe2|rheMac8	B0
chr10	12417880	12418189	+	AluSz6	hg19|panTro5|gorGor3|ponAbe2|rheMac8	B0
chr10	12428156	12428483	+	AluJo	hg19|panTro5|gorGor3|ponAbe2|rheMac8	B0
chr10	12441223	12441517	+	AluSx1	hg19|panTro5|gorGor3|ponAbe2|rheMac8	B0
chr10	12465230	12465532	+	AluJr	hg19|panTro5|gorGor3|ponAbe2|rheMac8	B0
chr10	124760517	124760821	-	AluY	hg19|panTro5|gorGor3|ponAbe2|rheMac8	B0
chr10	125460564	125460869	-	AluSp	hg19|panTro5|gorGor3|ponAbe2|rheMac8	B0
chr10	125554301	125554585	-	AluSx1	hg19|panTro5|gorGor3|ponAbe2|rheMac8	B0
chr10	12602271	12602580	+	AluSq	hg19|panTro5|gorGor3|ponAbe2|rheMac8	B0
chr10	12612395	12612699	+	AluSq2	hg19|panTro5|gorGor3|ponAbe2|rheMac8	B0
chr10	12628322	12628473	+	AluSx	hg19|panTro5|gorGor3|ponAbe2|rheMac8	B0
chr10	12635893	12636145	+	AluSz	hg19|panTro5|gorGor3|ponAbe2|rheMac8	B0
chr10	12644923	12645199	-	AluSx	hg19|panTro5|gorGor3|ponAbe2|rheMac8	B0
chr10	126464488	126464749	-	AluY	hg19|panTro5|gorGor3|ponAbe2|rheMac8	B0
chr10	12649679	12649986	+	AluJb	hg19|panTro5|gorGor3|ponAbe2|rheMac8	B0
chr10	126611881	126612136	+	AluSx3	hg19|panTro5|gorGor3|ponAbe2|rheMac8	B0
chr10	126664288	126664566	+	AluSz6	hg19|panTro5|gorGor3|ponAbe2|rheMac8	B0
chr10	126780742	126781049	-	AluSz	hg19|panTro5|gorGor3|ponAbe2|rheMac8	B0
chr10	126793564	126793676	-	AluJb	hg19|panTro5|gorGor3|ponAbe2|rheMac8	B0
chr10	127516273	127516561	+	AluJr4	hg19|panTro5|gorGor3|ponAbe2|rheMac8	B0
chr10	127568216	127568509	-	AluJb	hg19|panTro5|gorGor3|ponAbe2|rheMac8	B0
chr10	128600715	128601011	+	AluSq2	hg19|panTro5|gorGor3|ponAbe2|rheMac8	B0
chr10	128610498	128610808	+	AluJb	hg19|panTro5|gorGor3|ponAbe2|rheMac8	B0
chr10	12871451	12871748	+	AluSc8	hg19|panTro5|gorGor3|ponAbe2|rheMac8	B0
chr10	128784891	128785182	+	AluSx1	hg19|panTro5|gorGor3|ponAbe2|rheMac8	B0
chr10	128983510	128983762	+	AluSc5	hg19|panTro5|gorGor3|ponAbe2|rheMac8	B0
chr10	129000305	129000603	+	AluSz	hg19|panTro5|gorGor3|ponAbe2|rheMac8	B0
chr10	129101853	129102131	+	AluJb	hg19|panTro5|gorGor3|ponAbe2|rheMac8	B0
chr10	129677373	129677656	-	AluJb	hg19|panTro5|gorGor3|ponAbe2|rheMac8	B0
chr10	129683828	129684025	-	AluJb	hg19|panTro5|gorGor3|ponAbe2|rheMac8	B0
chr10	129687391	129687602	+	AluJb	hg19|panTro5|gorGor3|ponAbe2|rheMac8	B0
chr10	13030353	13030639	-	AluSz	hg19|panTro5|gorGor3|ponAbe2|rheMac8	B0
chr10	13178997	13179298	+	AluSz	hg19|panTro5|gorGor3|ponAbe2|rheMac8	B0
chr10	133780070	133780348	-	AluJo	hg19|panTro5|gorGor3|ponAbe2|rheMac8	B0
chr10	135108108	135108335	-	AluJr	hg19|panTro5|gorGor3|ponAbe2|rheMac8	B0
chr10	135109982	135110279	-	AluJb	hg19|panTro5|gorGor3|ponAbe2|rheMac8	B0
chr10	135208617	135208911	+	AluSc8	hg19|panTro5|gorGor3|ponAbe2|rheMac8	B0
chr10	135299962	135300275	-	AluSx3	hg19|panTro5|gorGor3|ponAbe2|rheMac8	B0
chr10	135348558	135348847	+	AluSx3	hg19|panTro5|gorGor3|ponAbe2|rheMac8	B0
chr10	13678139	13678423	+	AluJb	hg19|panTro5|gorGor3|ponAbe2|rheMac8	B0
chr10	13734865	13735173	-	AluJr	hg19|panTro5|gorGor3|ponAbe2|rheMac8	B0
chr10	13891482	13891778	-	AluSp	hg19|panTro5|gorGor3|ponAbe2|rheMac8	B0
chr10	13905988	13906295	-	AluSx1	hg19|panTro5|gorGor3|ponAbe2|rheMac8	B0
chr10	13963264	13963558	-	AluJb	hg19|panTro5|gorGor3|ponAbe2|rheMac8	B0
chr10	14085830	14086127	-	AluJr4	hg19|panTro5|gorGor3|ponAbe2|rheMac8	B0
chr10	14086919	14087188	-	AluJr	hg19|panTro5|gorGor3|ponAbe2|rheMac8	B0
chr10	14170103	14170401	-	AluJb	hg19|panTro5|gorGor3|ponAbe2|rheMac8	B0
chr10	14185627	14185907	-	AluSx1	hg19|panTro5|gorGor3|ponAbe2|rheMac8	B0
chr10	14269239	14269550	-	AluSz	hg19|panTro5|gorGor3|ponAbe2|rheMac8	B0
chr10	14519152	14519398	+	AluJr	hg19|panTro5|gorGor3|ponAbe2|rheMac8	B0
chr10	14566033	14566340	-	AluSq2	hg19|panTro5|gorGor3|ponAbe2|rheMac8	B0
chr10	14948874	14949148	-	AluJo	hg19|panTro5|gorGor3|ponAbe2|rheMac8	B0
chr10	14985552	14985844	-	AluSx	hg19|panTro5|gorGor3|ponAbe2|rheMac8	B0
chr10	15150183	15150483	-	AluSc	hg19|panTro5|gorGor3|ponAbe2|rheMac8	B0
chr10	15556386	15556699	-	AluSx1	hg19|panTro5|gorGor3|ponAbe2|rheMac8	B0
chr10	15575912	15576208	-	AluSz	hg19|panTro5|gorGor3|ponAbe2|rheMac8	B0
chr10	15590097	15590359	-	AluSz6	hg19|panTro5|gorGor3|ponAbe2|rheMac8	B0
chr10	15594132	15594432	-	AluY	hg19|panTro5|gorGor3|ponAbe2|rheMac8	B0
chr10	15598017	15598326	-	AluSx1	hg19|panTro5|gorGor3|ponAbe2|rheMac8	B0
chr10	15616393	15616685	-	AluSc	hg19|panTro5|gorGor3|ponAbe2|rheMac8	B0
chr10	15628925	15629219	-	AluSc	hg19|panTro5|gorGor3|ponAbe2|rheMac8	B0
chr10	15631763	15632061	-	AluSz	hg19|panTro5|gorGor3|ponAbe2|rheMac8	B0
chr10	15634623	15634890	-	AluJb	hg19|panTro5|gorGor3|ponAbe2|rheMac8	B0
chr10	15675426	15675718	-	AluSx	hg19|panTro5|gorGor3|ponAbe2|rheMac8	B0
chr10	15676994	15677303	-	AluSc	hg19|panTro5|gorGor3|ponAbe2|rheMac8	B0
chr10	15679503	15679787	-	AluJb	hg19|panTro5|gorGor3|ponAbe2|rheMac8	B0
chr10	15683062	15683217	-	AluSc8	hg19|panTro5|gorGor3|ponAbe2|rheMac8	B0
chr10	15695823	15696134	-	AluSx1	hg19|panTro5|gorGor3|ponAbe2|rheMac8	B0
chr10	15704325	15704637	-	AluJo	hg19|panTro5|gorGor3|ponAbe2|rheMac8	B0
chr10	15705574	15705870	-	AluJb	hg19|panTro5|gorGor3|ponAbe2|rheMac8	B0
chr10	15715094	15715381	-	AluSx3	hg19|panTro5|gorGor3|ponAbe2|rheMac8	B0
chr10	15748471	15748738	-	AluJr	hg19|panTro5|gorGor3|ponAbe2|rheMac8	B0
chr10	16484487	16484603	+	AluJo	hg19|panTro5|gorGor3|ponAbe2|rheMac8	B0
chr10	16487264	16487431	+	AluSx	hg19|panTro5|gorGor3|ponAbe2|rheMac8	B0
chr10	16866041	16866350	-	AluJo	hg19|panTro5|gorGor3|ponAbe2|rheMac8	B0
chr10	16866514	16866820	-	AluSx1	hg19|panTro5|gorGor3|ponAbe2|rheMac8	B0
chr10	17079941	17080101	-	AluSx	hg19|panTro5|gorGor3|ponAbe2|rheMac8	B0
chr10	17156960	17157263	+	AluSz6	hg19|panTro5|gorGor3|ponAbe2|rheMac8	B0
chr10	1759761	1760069	-	AluSz	hg19|panTro5|gorGor3|ponAbe2|rheMac8	B0
chr10	17650017	17650326	-	AluJo	hg19|panTro5|gorGor3|ponAbe2|rheMac8	B0
chr10	17729191	17729518	+	AluSz	hg19|panTro5|gorGor3|ponAbe2|rheMac8	B0
chr10	17805206	17805446	+	AluJr	hg19|panTro5|gorGor3|ponAbe2|rheMac8	B0
chr10	18466266	18466537	+	AluSx1	hg19|panTro5|gorGor3|ponAbe2|rheMac8	B0
chr10	18497279	18497563	+	AluJo	hg19|panTro5|gorGor3|ponAbe2|rheMac8	B0
chr10	18565809	18566058	+	AluJb	hg19|panTro5|gorGor3|ponAbe2|rheMac8	B0
chr10	18631274	18631397	+	AluJr	hg19|panTro5|gorGor3|ponAbe2|rheMac8	B0
chr10	18687311	18687593	+	AluJo	hg19|panTro5|gorGor3|ponAbe2|rheMac8	B0
chr10	18704111	18704426	+	AluJo	hg19|panTro5|gorGor3|ponAbe2|rheMac8	B0
chr10	18734680	18734973	+	AluSq2	hg19|panTro5|gorGor3|ponAbe2|rheMac8	B0
chr10	18830976	18831133	+	AluJb	hg19|panTro5|gorGor3|ponAbe2|rheMac8	B0
chr10	19405739	19406050	+	AluSx1	hg19|panTro5|gorGor3|ponAbe2|rheMac8	B0
chr10	19696116	19696439	+	AluJr	hg19|panTro5|gorGor3|ponAbe2|rheMac8	B0
chr10	19728178	19728475	+	AluJo	hg19|panTro5|gorGor3|ponAbe2|rheMac8	B0
chr10	19913512	19913828	+	AluSz	hg19|panTro5|gorGor3|ponAbe2|rheMac8	B0
chr10	20087094	20087389	+	AluJb	hg19|panTro5|gorGor3|ponAbe2|rheMac8	B0
chr10	20112784	20112957	+	AluJb	hg19|panTro5|gorGor3|ponAbe2|rheMac8	B0
chr10	20118440	20118679	+	AluSx3	hg19|panTro5|gorGor3|ponAbe2|rheMac8	B0
chr10	20124820	20125123	+	AluJo	hg19|panTro5|gorGor3|ponAbe2|rheMac8	B0
chr10	20127832	20128134	+	AluSq2	hg19|panTro5|gorGor3|ponAbe2|rheMac8	B0
chr10	201306	201430	+	AluJr	hg19|panTro5|gorGor3|ponAbe2|rheMac8	B0
chr10	20130922	20131110	+	AluJr	hg19|panTro5|gorGor3|ponAbe2|rheMac8	B0
chr10	20144732	20145053	+	AluSc8	hg19|panTro5|gorGor3|ponAbe2|rheMac8	B0
chr10	20158049	20158382	+	AluJb	hg19|panTro5|gorGor3|ponAbe2|rheMac8	B0
chr10	20199657	20199967	+	AluSx3	hg19|panTro5|gorGor3|ponAbe2|rheMac8	B0
chr10	20218021	20218148	+	AluSx	hg19|panTro5|gorGor3|ponAbe2|rheMac8	B0
chr10	20294836	20295128	+	AluSx1	hg19|panTro5|gorGor3|ponAbe2|rheMac8	B0
chr10	20367102	20367329	+	AluJo	hg19|panTro5|gorGor3|ponAbe2|rheMac8	B0
chr10	20517207	20517510	+	AluJb	hg19|panTro5|gorGor3|ponAbe2|rheMac8	B0
chr10	20530434	20530732	+	AluJo	hg19|panTro5|gorGor3|ponAbe2|rheMac8	B0
chr10	20558664	20558985	+	AluSz	hg19|panTro5|gorGor3|ponAbe2|rheMac8	B0
chr10	20573371	20573534	+	AluJo	hg19|panTro5|gorGor3|ponAbe2|rheMac8	B0
chr10	2057487	2057814	-	AluSx1	hg19|panTro5|gorGor3|ponAbe2|rheMac8	B0
chr10	21090131	21090425	-	AluSz6	hg19|panTro5|gorGor3|ponAbe2|rheMac8	B0
chr10	21143490	21143793	-	AluJr	hg19|panTro5|gorGor3|ponAbe2|rheMac8	B0
chr10	21201810	21201859	-	AluSz6	hg19|panTro5|gorGor3|ponAbe2|rheMac8	B0
chr10	21263172	21263477	-	AluJb	hg19|panTro5|gorGor3|ponAbe2|rheMac8	B0
chr10	21437445	21437754	-	AluSc	hg19|panTro5|gorGor3|ponAbe2|rheMac8	B0
chr10	21438218	21438519	-	AluSx1	hg19|panTro5|gorGor3|ponAbe2|rheMac8	B0
chr10	21828717	21828894	+	AluSx	hg19|panTro5|gorGor3|ponAbe2|rheMac8	B0
chr10	21893255	21893523	+	AluSq2	hg19|panTro5|gorGor3|ponAbe2|rheMac8	B0
chr10	21907155	21907449	+	AluSx1	hg19|panTro5|gorGor3|ponAbe2|rheMac8	B0
chr10	21960713	21960909	+	AluJb	hg19|panTro5|gorGor3|ponAbe2|rheMac8	B0
chr10	21980811	21981120	+	AluSz	hg19|panTro5|gorGor3|ponAbe2|rheMac8	B0
chr10	22005339	22005640	+	AluSx	hg19|panTro5|gorGor3|ponAbe2|rheMac8	B0
chr10	22026009	22026102	+	AluJr	hg19|panTro5|gorGor3|ponAbe2|rheMac8	B0
chr10	22251388	22251639	-	AluJb	hg19|panTro5|gorGor3|ponAbe2|rheMac8	B0
chr10	22274177	22274477	-	AluSz	hg19|panTro5|gorGor3|ponAbe2|rheMac8	B0
chr10	22535232	22535527	-	AluSq2	hg19|panTro5|gorGor3|ponAbe2|rheMac8	B0
chr10	22997736	22998013	-	AluJr	hg19|panTro5|gorGor3|ponAbe2|rheMac8	B0
chr10	23293863	23294162	+	AluY	hg19|panTro5|gorGor3|ponAbe2|rheMac8	B0
chr10	23411995	23412307	-	AluSg4	hg19|panTro5|gorGor3|ponAbe2|rheMac8	B0
chr10	23437509	23437810	-	AluSx	hg19|panTro5|gorGor3|ponAbe2|rheMac8	B0
chr10	23648078	23648260	+	AluSx	hg19|panTro5|gorGor3|ponAbe2|rheMac8	B0
chr10	24386198	24386483	+	AluJo	hg19|panTro5|gorGor3|ponAbe2|rheMac8	B0
chr10	24435416	24435638	+	AluJb	hg19|panTro5|gorGor3|ponAbe2|rheMac8	B0
chr10	24541229	24541517	+	AluJo	hg19|panTro5|gorGor3|ponAbe2|rheMac8	B0
chr10	24546960	24547109	+	AluJb	hg19|panTro5|gorGor3|ponAbe2|rheMac8	B0
chr10	24560402	24560693	+	AluJb	hg19|panTro5|gorGor3|ponAbe2|rheMac8	B0
chr10	24562498	24562796	+	AluSx	hg19|panTro5|gorGor3|ponAbe2|rheMac8	B0
chr10	24606955	24607070	+	AluJr	hg19|panTro5|gorGor3|ponAbe2|rheMac8	B0
chr10	24763865	24764165	+	AluSq10	hg19|panTro5|gorGor3|ponAbe2|rheMac8	B0
chr10	24791639	24791931	+	AluSx3	hg19|panTro5|gorGor3|ponAbe2|rheMac8	B0
chr10	24804718	24805026	+	AluJo	hg19|panTro5|gorGor3|ponAbe2|rheMac8	B0
chr10	24811936	24812266	+	AluJr	hg19|panTro5|gorGor3|ponAbe2|rheMac8	B0
chr10	24827324	24827431	+	AluJr	hg19|panTro5|gorGor3|ponAbe2|rheMac8	B0
chr10	24881085	24881179	-	AluJb	hg19|panTro5|gorGor3|ponAbe2|rheMac8	B0
chr10	24936767	24937067	-	AluSx	hg19|panTro5|gorGor3|ponAbe2|rheMac8	B0
chr10	26799379	26799663	+	AluJr	hg19|panTro5|gorGor3|ponAbe2|rheMac8	B0
chr10	26842299	26842586	+	AluJr	hg19|panTro5|gorGor3|ponAbe2|rheMac8	B0
chr10	27049862	27050166	-	AluJo	hg19|panTro5|gorGor3|ponAbe2|rheMac8	B0
chr10	27062141	27062428	-	AluSz	hg19|panTro5|gorGor3|ponAbe2|rheMac8	B0
chr10	27105949	27106222	-	AluSx1	hg19|panTro5|gorGor3|ponAbe2|rheMac8	B0
chr10	27399805	27399967	-	AluSx	hg19|panTro5|gorGor3|ponAbe2|rheMac8	B0
chr10	27399967	27400285	-	AluSx1	hg19|panTro5|gorGor3|ponAbe2|rheMac8	B0
chr10	27400285	27400417	-	AluSx	hg19|panTro5|gorGor3|ponAbe2|rheMac8	B0
chr10	27401646	27401845	-	AluJb	hg19|panTro5|gorGor3|ponAbe2|rheMac8	B0
chr10	27428138	27428396	-	AluJr4	hg19|panTro5|gorGor3|ponAbe2|rheMac8	B0
chr10	27557260	27557447	-	AluSc8	hg19|panTro5|gorGor3|ponAbe2|rheMac8	B0
chr10	27806009	27806308	+	AluSx	hg19|panTro5|gorGor3|ponAbe2|rheMac8	B0
chr10	27859626	27859923	+	AluJb	hg19|panTro5|gorGor3|ponAbe2|rheMac8	B0
chr10	28336715	28336943	-	AluJb	hg19|panTro5|gorGor3|ponAbe2|rheMac8	B0
chr10	28345118	28345387	-	AluJb	hg19|panTro5|gorGor3|ponAbe2|rheMac8	B0
chr10	28394450	28394742	-	AluSx	hg19|panTro5|gorGor3|ponAbe2|rheMac8	B0
chr10	28432832	28433087	-	AluSx1	hg19|panTro5|gorGor3|ponAbe2|rheMac8	B0
chr10	28486110	28486411	-	AluSz	hg19|panTro5|gorGor3|ponAbe2|rheMac8	B0
chr10	28528061	28528375	-	AluSx1	hg19|panTro5|gorGor3|ponAbe2|rheMac8	B0
chr10	28544075	28544338	-	AluSx1	hg19|panTro5|gorGor3|ponAbe2|rheMac8	B0
chr10	28554899	28555188	-	AluSx1	hg19|panTro5|gorGor3|ponAbe2|rheMac8	B0
chr10	28561834	28562146	-	AluSz	hg19|panTro5|gorGor3|ponAbe2|rheMac8	B0
chr10	28572448	28572743	-	AluSx1	hg19|panTro5|gorGor3|ponAbe2|rheMac8	B0
chr10	28574118	28574413	-	AluSp	hg19|panTro5|gorGor3|ponAbe2|rheMac8	B0
chr10	28624166	28624259	-	AluYc	hg19|panTro5|gorGor3|ponAbe2|rheMac8	B0
chr10	28811914	28812209	-	AluSp	hg19|panTro5|gorGor3|ponAbe2|rheMac8	B0
chr10	28812502	28812687	-	AluSc	hg19|panTro5|gorGor3|ponAbe2|rheMac8	B0
chr10	28814453	28814712	-	AluSx1	hg19|panTro5|gorGor3|ponAbe2|rheMac8	B0
chr10	28824889	28825189	+	AluSx1	hg19|panTro5|gorGor3|ponAbe2|rheMac8	B0
chr10	28827230	28827533	+	AluSx1	hg19|panTro5|gorGor3|ponAbe2|rheMac8	B0
chr10	28833710	28833989	+	AluSx	hg19|panTro5|gorGor3|ponAbe2|rheMac8	B0
chr10	28834138	28834426	+	AluSp	hg19|panTro5|gorGor3|ponAbe2|rheMac8	B0
chr10	28846721	28847018	+	AluSc8	hg19|panTro5|gorGor3|ponAbe2|rheMac8	B0
chr10	28848988	28849287	+	AluJb	hg19|panTro5|gorGor3|ponAbe2|rheMac8	B0
chr10	28852923	28853208	+	AluJb	hg19|panTro5|gorGor3|ponAbe2|rheMac8	B0
chr10	28860987	28861283	+	AluSg4	hg19|panTro5|gorGor3|ponAbe2|rheMac8	B0
chr10	28873738	28874010	+	AluSg4	hg19|panTro5|gorGor3|ponAbe2|rheMac8	B0
chr10	28875326	28875648	+	AluJr	hg19|panTro5|gorGor3|ponAbe2|rheMac8	B0
chr10	28881270	28881570	+	AluSc	hg19|panTro5|gorGor3|ponAbe2|rheMac8	B0
chr10	28893378	28893659	+	AluSz6	hg19|panTro5|gorGor3|ponAbe2|rheMac8	B0
chr10	28902302	28902446	+	AluJr4	hg19|panTro5|gorGor3|ponAbe2|rheMac8	B0
chr10	29728382	29728507	+	AluJo	hg19|panTro5|gorGor3|ponAbe2|rheMac8	B0
chr10	29744554	29744858	-	AluSz6	hg19|panTro5|gorGor3|ponAbe2|rheMac8	B0
chr10	29748737	29749031	+	AluJo	hg19|panTro5|gorGor3|ponAbe2|rheMac8	B0
chr10	29846033	29846326	-	AluJb	hg19|panTro5|gorGor3|ponAbe2|rheMac8	B0
chr10	29865506	29865773	-	AluJr4	hg19|panTro5|gorGor3|ponAbe2|rheMac8	B0
chr10	29883479	29883785	-	AluJb	hg19|panTro5|gorGor3|ponAbe2|rheMac8	B0
chr10	29888352	29888645	-	AluSz6	hg19|panTro5|gorGor3|ponAbe2|rheMac8	B0
chr10	29888963	29889132	-	AluJr	hg19|panTro5|gorGor3|ponAbe2|rheMac8	B0
chr10	29893513	29893797	-	AluJr	hg19|panTro5|gorGor3|ponAbe2|rheMac8	B0
chr10	29895682	29895983	-	AluSx	hg19|panTro5|gorGor3|ponAbe2|rheMac8	B0
chr10	29925718	29926037	-	AluJb	hg19|panTro5|gorGor3|ponAbe2|rheMac8	B0
chr10	29928094	29928397	-	AluSc	hg19|panTro5|gorGor3|ponAbe2|rheMac8	B0
chr10	29928398	29928694	-	AluSq2	hg19|panTro5|gorGor3|ponAbe2|rheMac8	B0
chr10	29931621	29931914	-	AluSz	hg19|panTro5|gorGor3|ponAbe2|rheMac8	B0
chr10	29944803	29945097	-	AluSc5	hg19|panTro5|gorGor3|ponAbe2|rheMac8	B0
chr10	29966359	29966648	-	AluJo	hg19|panTro5|gorGor3|ponAbe2|rheMac8	B0
chr10	29993365	29993460	-	AluJr	hg19|panTro5|gorGor3|ponAbe2|rheMac8	B0
chr10	30022252	30022533	-	AluJr	hg19|panTro5|gorGor3|ponAbe2|rheMac8	B0
chr10	30530969	30531264	+	AluSx1	hg19|panTro5|gorGor3|ponAbe2|rheMac8	B0
chr10	30600603	30600756	-	AluSc8	hg19|panTro5|gorGor3|ponAbe2|rheMac8	B0
chr10	30732837	30733132	+	AluJb	hg19|panTro5|gorGor3|ponAbe2|rheMac8	B0
chr10	309750	310059	-	AluSx	hg19|panTro5|gorGor3|ponAbe2|rheMac8	B0
chr10	31208538	31208740	-	AluSx	hg19|panTro5|gorGor3|ponAbe2|rheMac8	B0
chr10	32305446	32305763	-	AluSx1	hg19|panTro5|gorGor3|ponAbe2|rheMac8	B0
chr10	32330570	32330857	-	AluJo	hg19|panTro5|gorGor3|ponAbe2|rheMac8	B0
chr10	32418869	32419123	+	AluSx	hg19|panTro5|gorGor3|ponAbe2|rheMac8	B0
chr10	32578554	32578851	-	AluY	hg19|panTro5|gorGor3|ponAbe2|rheMac8	B0
chr10	33235778	33236070	-	AluSz	hg19|panTro5|gorGor3|ponAbe2|rheMac8	B0
chr10	33472939	33473242	-	AluSz	hg19|panTro5|gorGor3|ponAbe2|rheMac8	B0
chr10	33580821	33581123	-	AluJb	hg19|panTro5|gorGor3|ponAbe2|rheMac8	B0
chr10	34032813	34033116	-	AluJb	hg19|panTro5|gorGor3|ponAbe2|rheMac8	B0
chr10	34538132	34538239	-	AluJr	hg19|panTro5|gorGor3|ponAbe2|rheMac8	B0
chr10	34633198	34633508	-	AluSx	hg19|panTro5|gorGor3|ponAbe2|rheMac8	B0
chr10	34653362	34653660	-	AluJo	hg19|panTro5|gorGor3|ponAbe2|rheMac8	B0
chr10	34654512	34654810	-	AluSx	hg19|panTro5|gorGor3|ponAbe2|rheMac8	B0
chr10	34683971	34684262	-	AluSx1	hg19|panTro5|gorGor3|ponAbe2|rheMac8	B0
chr10	34714344	34714605	-	AluJo	hg19|panTro5|gorGor3|ponAbe2|rheMac8	B0
chr10	34728380	34728660	-	AluSz	hg19|panTro5|gorGor3|ponAbe2|rheMac8	B0
chr10	34769167	34769466	-	AluJr	hg19|panTro5|gorGor3|ponAbe2|rheMac8	B0
chr10	34771259	34771398	-	AluJb	hg19|panTro5|gorGor3|ponAbe2|rheMac8	B0
chr10	34800657	34800847	-	AluJb	hg19|panTro5|gorGor3|ponAbe2|rheMac8	B0
chr10	34804911	34805192	-	AluSx1	hg19|panTro5|gorGor3|ponAbe2|rheMac8	B0
chr10	34839157	34839440	-	AluJr	hg19|panTro5|gorGor3|ponAbe2|rheMac8	B0
chr10	34851687	34851998	-	AluJr	hg19|panTro5|gorGor3|ponAbe2|rheMac8	B0
chr10	34852460	34852751	-	AluSc	hg19|panTro5|gorGor3|ponAbe2|rheMac8	B0
chr10	34863938	34864071	-	AluJo	hg19|panTro5|gorGor3|ponAbe2|rheMac8	B0
chr10	34866778	34867083	-	AluJr	hg19|panTro5|gorGor3|ponAbe2|rheMac8	B0
chr10	34868523	34868823	-	AluSz	hg19|panTro5|gorGor3|ponAbe2|rheMac8	B0
chr10	34868852	34869142	-	AluSx	hg19|panTro5|gorGor3|ponAbe2|rheMac8	B0
chr10	34886368	34886524	-	AluJr	hg19|panTro5|gorGor3|ponAbe2|rheMac8	B0
chr10	34889709	34890038	-	AluJb	hg19|panTro5|gorGor3|ponAbe2|rheMac8	B0
chr10	34897462	34897761	-	AluSx1	hg19|panTro5|gorGor3|ponAbe2|rheMac8	B0
chr10	34898474	34898735	-	AluJr	hg19|panTro5|gorGor3|ponAbe2|rheMac8	B0
chr10	34910194	34910423	-	AluSz6	hg19|panTro5|gorGor3|ponAbe2|rheMac8	B0
chr10	34915950	34916254	-	AluJo	hg19|panTro5|gorGor3|ponAbe2|rheMac8	B0
chr10	34920562	34920824	-	AluJb	hg19|panTro5|gorGor3|ponAbe2|rheMac8	B0
chr10	34933781	34934080	-	AluJr	hg19|panTro5|gorGor3|ponAbe2|rheMac8	B0
chr10	34934151	34934433	-	AluSz	hg19|panTro5|gorGor3|ponAbe2|rheMac8	B0
chr10	34946456	34946766	-	AluSx	hg19|panTro5|gorGor3|ponAbe2|rheMac8	B0
chr10	34953131	34953428	-	AluSg	hg19|panTro5|gorGor3|ponAbe2|rheMac8	B0
chr10	34963406	34963714	-	AluSx1	hg19|panTro5|gorGor3|ponAbe2|rheMac8	B0
chr10	34974524	34974821	-	AluSz	hg19|panTro5|gorGor3|ponAbe2|rheMac8	B0
chr10	34978862	34979169	-	AluSz	hg19|panTro5|gorGor3|ponAbe2|rheMac8	B0
chr10	35004004	35004283	-	AluJo	hg19|panTro5|gorGor3|ponAbe2|rheMac8	B0
chr10	35014102	35014382	-	AluSx1	hg19|panTro5|gorGor3|ponAbe2|rheMac8	B0
chr10	35027272	35027407	-	AluJr	hg19|panTro5|gorGor3|ponAbe2|rheMac8	B0
chr10	35095416	35095558	-	AluJb	hg19|panTro5|gorGor3|ponAbe2|rheMac8	B0
chr10	35292369	35292635	-	AluSz	hg19|panTro5|gorGor3|ponAbe2|rheMac8	B0
chr10	35619679	35619985	-	AluSx	hg19|panTro5|gorGor3|ponAbe2|rheMac8	B0
chr10	35726333	35726607	+	AluJb	hg19|panTro5|gorGor3|ponAbe2|rheMac8	B0
chr10	35733168	35733474	-	AluSz	hg19|panTro5|gorGor3|ponAbe2|rheMac8	B0
chr10	364844	365151	-	AluSz	hg19|panTro5|gorGor3|ponAbe2|rheMac8	B0
chr10	37704160	37704453	+	AluJr	hg19|panTro5|gorGor3|ponAbe2|rheMac8	B0
chr10	37717133	37717267	+	AluJb	hg19|panTro5|gorGor3|ponAbe2|rheMac8	B0
chr10	38133932	38134245	-	AluJb	hg19|panTro5|gorGor3|ponAbe2|rheMac8	B0
chr10	38347412	38347704	+	AluSx3	hg19|panTro5|gorGor3|ponAbe2|rheMac8	B0
chr10	38405755	38406041	+	AluSz6	hg19|panTro5|gorGor3|ponAbe2|rheMac8	B0
chr10	38410883	38411186	+	AluJb	hg19|panTro5|gorGor3|ponAbe2|rheMac8	B0
chr10	38719084	38719247	+	AluJb	hg19|panTro5|gorGor3|ponAbe2|rheMac8	B0
chr10	3963924	3964240	+	AluSq2	hg19|panTro5|gorGor3|ponAbe2|rheMac8	B0
chr10	43085843	43086015	-	AluSc8	hg19|panTro5|gorGor3|ponAbe2|rheMac8	B0
chr10	43173779	43174059	-	AluJb	hg19|panTro5|gorGor3|ponAbe2|rheMac8	B0
chr10	43666800	43667098	-	AluSx	hg19|panTro5|gorGor3|ponAbe2|rheMac8	B0
chr10	43898541	43898758	-	AluSz	hg19|panTro5|gorGor3|ponAbe2|rheMac8	B0
chr10	43973117	43973423	+	AluSq2	hg19|panTro5|gorGor3|ponAbe2|rheMac8	B0
chr10	44846866	44847180	-	AluSx	hg19|panTro5|gorGor3|ponAbe2|rheMac8	B0
chr10	45927608	45927836	+	AluJr	hg19|panTro5|gorGor3|ponAbe2|rheMac8	B0
chr10	45987733	45988044	-	AluY	hg19|panTro5|gorGor3|ponAbe2|rheMac8	B0
chr10	49891904	49891987	-	AluSq	hg19|panTro5|gorGor3|ponAbe2|rheMac8	B0
chr10	50008794	50009077	-	AluSx	hg19|panTro5|gorGor3|ponAbe2|rheMac8	B0
chr10	50223164	50223461	-	AluY	hg19|panTro5|gorGor3|ponAbe2|rheMac8	B0
chr10	5060841	5061100	-	AluJo	hg19|panTro5|gorGor3|ponAbe2|rheMac8	B0
chr10	50758384	50758684	-	AluSz6	hg19|panTro5|gorGor3|ponAbe2|rheMac8	B0
chr10	5148660	5148956	+	AluSx	hg19|panTro5|gorGor3|ponAbe2|rheMac8	B0
chr10	51591662	51591957	-	AluSx	hg19|panTro5|gorGor3|ponAbe2|rheMac8	B0
chr10	51724158	51724194	+	AluSz6	hg19|panTro5|gorGor3|ponAbe2|rheMac8	B0
chr10	51724271	51724308	+	AluYc	hg19|panTro5|gorGor3|ponAbe2|rheMac8	B0
chr10	51828905	51829189	+	AluSx3	hg19|panTro5|gorGor3|ponAbe2|rheMac8	B0
chr10	52144314	52144509	-	AluJr	hg19|panTro5|gorGor3|ponAbe2|rheMac8	B0
chr10	52624376	52624677	-	AluSp	hg19|panTro5|gorGor3|ponAbe2|rheMac8	B0
chr10	52763941	52764251	+	AluSp	hg19|panTro5|gorGor3|ponAbe2|rheMac8	B0
chr10	52938116	52938408	+	AluJb	hg19|panTro5|gorGor3|ponAbe2|rheMac8	B0
chr10	52960938	52961230	+	AluSq10	hg19|panTro5|gorGor3|ponAbe2|rheMac8	B0
chr10	52979187	52979501	+	AluSx3	hg19|panTro5|gorGor3|ponAbe2|rheMac8	B0
chr10	52985682	52985989	+	AluSx1	hg19|panTro5|gorGor3|ponAbe2|rheMac8	B0
chr10	52989406	52989714	+	AluJb	hg19|panTro5|gorGor3|ponAbe2|rheMac8	B0
chr10	52998369	52998536	+	AluSx	hg19|panTro5|gorGor3|ponAbe2|rheMac8	B0
chr10	53032988	53033308	+	AluJb	hg19|panTro5|gorGor3|ponAbe2|rheMac8	B0
chr10	53049888	53050019	+	AluJr	hg19|panTro5|gorGor3|ponAbe2|rheMac8	B0
chr10	53050149	53050181	+	AluJo	hg19|panTro5|gorGor3|ponAbe2|rheMac8	B0
chr10	53084225	53084509	+	AluY	hg19|panTro5|gorGor3|ponAbe2|rheMac8	B0
chr10	53086892	53087192	+	AluSz	hg19|panTro5|gorGor3|ponAbe2|rheMac8	B0
chr10	53140277	53140362	+	AluSx	hg19|panTro5|gorGor3|ponAbe2|rheMac8	B0
chr10	53259418	53259739	+	AluJr	hg19|panTro5|gorGor3|ponAbe2|rheMac8	B0
chr10	53280770	53281063	+	AluSx	hg19|panTro5|gorGor3|ponAbe2|rheMac8	B0
chr10	53297210	53297508	+	AluSg	hg19|panTro5|gorGor3|ponAbe2|rheMac8	B0
chr10	53320724	53321118	+	AluJb	hg19|panTro5|gorGor3|ponAbe2|rheMac8	B0
chr10	53354825	53355101	+	AluJr	hg19|panTro5|gorGor3|ponAbe2|rheMac8	B0
chr10	53384955	53385263	+	AluSx1	hg19|panTro5|gorGor3|ponAbe2|rheMac8	B0
chr10	53408681	53408780	+	AluYc	hg19|panTro5|gorGor3|ponAbe2|rheMac8	B0
chr10	53423182	53423484	+	AluJr	hg19|panTro5|gorGor3|ponAbe2|rheMac8	B0
chr10	53442964	53443110	+	AluSz6	hg19|panTro5|gorGor3|ponAbe2|rheMac8	B0
chr10	53477309	53477611	+	AluY	hg19|panTro5|gorGor3|ponAbe2|rheMac8	B0
chr10	53836034	53836314	+	AluSz	hg19|panTro5|gorGor3|ponAbe2|rheMac8	B0
chr10	53904288	53904603	+	AluSz	hg19|panTro5|gorGor3|ponAbe2|rheMac8	B0
chr10	53990875	53991180	+	AluJb	hg19|panTro5|gorGor3|ponAbe2|rheMac8	B0
chr10	54717947	54718232	-	AluSc8	hg19|panTro5|gorGor3|ponAbe2|rheMac8	B0
chr10	5730687	5730965	+	AluJr	hg19|panTro5|gorGor3|ponAbe2|rheMac8	B0
chr10	5748683	5748978	+	AluSx1	hg19|panTro5|gorGor3|ponAbe2|rheMac8	B0
chr10	57879579	57879884	-	AluSx1	hg19|panTro5|gorGor3|ponAbe2|rheMac8	B0
chr10	5915863	5916149	-	AluSc	hg19|panTro5|gorGor3|ponAbe2|rheMac8	B0
chr10	59233353	59233651	+	AluSx	hg19|panTro5|gorGor3|ponAbe2|rheMac8	B0
chr10	5942778	5943087	+	AluSz6	hg19|panTro5|gorGor3|ponAbe2|rheMac8	B0
chr10	59981497	59981809	-	AluSx1	hg19|panTro5|gorGor3|ponAbe2|rheMac8	B0
chr10	60038016	60038328	+	AluJb	hg19|panTro5|gorGor3|ponAbe2|rheMac8	B0
chr10	61724710	61725019	-	AluSz	hg19|panTro5|gorGor3|ponAbe2|rheMac8	B0
chr10	61888125	61888436	-	AluSz	hg19|panTro5|gorGor3|ponAbe2|rheMac8	B0
chr10	62049173	62049447	-	AluJb	hg19|panTro5|gorGor3|ponAbe2|rheMac8	B0
chr10	62067089	62067397	-	AluJo	hg19|panTro5|gorGor3|ponAbe2|rheMac8	B0
chr10	62163329	62163458	-	AluYc	hg19|panTro5|gorGor3|ponAbe2|rheMac8	B0
chr10	62170429	62170731	-	AluJr	hg19|panTro5|gorGor3|ponAbe2|rheMac8	B0
chr10	6219483	6219785	-	AluSq2	hg19|panTro5|gorGor3|ponAbe2|rheMac8	B0
chr10	62201854	62202147	-	AluSx	hg19|panTro5|gorGor3|ponAbe2|rheMac8	B0
chr10	62222656	62222961	-	AluJb	hg19|panTro5|gorGor3|ponAbe2|rheMac8	B0
chr10	62258145	62258424	-	AluJb	hg19|panTro5|gorGor3|ponAbe2|rheMac8	B0
chr10	62322189	62322375	-	AluSx3	hg19|panTro5|gorGor3|ponAbe2|rheMac8	B0
chr10	62372246	62372503	-	AluSc8	hg19|panTro5|gorGor3|ponAbe2|rheMac8	B0
chr10	62429584	62429881	-	AluJo	hg19|panTro5|gorGor3|ponAbe2|rheMac8	B0
chr10	62489907	62490212	-	AluJo	hg19|panTro5|gorGor3|ponAbe2|rheMac8	B0
chr10	6268766	6269067	+	AluSx1	hg19|panTro5|gorGor3|ponAbe2|rheMac8	B0
chr10	63709113	63709394	+	AluSq2	hg19|panTro5|gorGor3|ponAbe2|rheMac8	B0
chr10	64010383	64010689	-	AluJb	hg19|panTro5|gorGor3|ponAbe2|rheMac8	B0
chr10	64503444	64503742	+	AluSz6	hg19|panTro5|gorGor3|ponAbe2|rheMac8	B0
chr10	64755824	64756136	+	AluJb	hg19|panTro5|gorGor3|ponAbe2|rheMac8	B0
chr10	64947200	64947500	-	AluJo	hg19|panTro5|gorGor3|ponAbe2|rheMac8	B0
chr10	64965584	64965748	-	AluJb	hg19|panTro5|gorGor3|ponAbe2|rheMac8	B0
chr10	65014619	65014901	-	AluJb	hg19|panTro5|gorGor3|ponAbe2|rheMac8	B0
chr10	65054041	65054339	-	AluSc	hg19|panTro5|gorGor3|ponAbe2|rheMac8	B0
chr10	65054854	65055158	-	AluJr	hg19|panTro5|gorGor3|ponAbe2|rheMac8	B0
chr10	65065305	65065385	-	AluJb	hg19|panTro5|gorGor3|ponAbe2|rheMac8	B0
chr10	65123009	65123317	-	AluSx	hg19|panTro5|gorGor3|ponAbe2|rheMac8	B0
chr10	65128933	65129202	-	AluSz	hg19|panTro5|gorGor3|ponAbe2|rheMac8	B0
chr10	65134943	65135097	-	AluJr	hg19|panTro5|gorGor3|ponAbe2|rheMac8	B0
chr10	65135323	65135591	-	AluJr	hg19|panTro5|gorGor3|ponAbe2|rheMac8	B0
chr10	65188760	65189038	-	AluSp	hg19|panTro5|gorGor3|ponAbe2|rheMac8	B0
chr10	65232539	65232842	-	AluSc	hg19|panTro5|gorGor3|ponAbe2|rheMac8	B0
chr10	65251794	65252010	-	AluJb	hg19|panTro5|gorGor3|ponAbe2|rheMac8	B0
chr10	67384264	67384572	+	AluJr	hg19|panTro5|gorGor3|ponAbe2|rheMac8	B0
chr10	68722157	68722468	-	AluSc5	hg19|panTro5|gorGor3|ponAbe2|rheMac8	B0
chr10	68777536	68777829	-	AluSz	hg19|panTro5|gorGor3|ponAbe2|rheMac8	B0
chr10	68926582	68926884	+	AluSz	hg19|panTro5|gorGor3|ponAbe2|rheMac8	B0
chr10	69615150	69615452	-	AluSp	hg19|panTro5|gorGor3|ponAbe2|rheMac8	B0
chr10	69683322	69683515	-	AluJb	hg19|panTro5|gorGor3|ponAbe2|rheMac8	B0
chr10	69724520	69724828	-	AluSx3	hg19|panTro5|gorGor3|ponAbe2|rheMac8	B0
chr10	69759782	69759909	-	AluJr	hg19|panTro5|gorGor3|ponAbe2|rheMac8	B0
chr10	69801775	69802063	-	AluSg7	hg19|panTro5|gorGor3|ponAbe2|rheMac8	B0
chr10	70043522	70043803	-	AluSx	hg19|panTro5|gorGor3|ponAbe2|rheMac8	B0
chr10	70054481	70054684	-	AluSx1	hg19|panTro5|gorGor3|ponAbe2|rheMac8	B0
chr10	70116986	70117288	-	AluSx1	hg19|panTro5|gorGor3|ponAbe2|rheMac8	B0
chr10	70164789	70165098	+	AluSc	hg19|panTro5|gorGor3|ponAbe2|rheMac8	B0
chr10	70343794	70344098	-	AluSx	hg19|panTro5|gorGor3|ponAbe2|rheMac8	B0
chr10	70364948	70365176	+	AluSp	hg19|panTro5|gorGor3|ponAbe2|rheMac8	B0
chr10	70518164	70518260	+	AluJo	hg19|panTro5|gorGor3|ponAbe2|rheMac8	B0
chr10	70534112	70534401	+	AluSx	hg19|panTro5|gorGor3|ponAbe2|rheMac8	B0
chr10	70551545	70551848	+	AluSq2	hg19|panTro5|gorGor3|ponAbe2|rheMac8	B0
chr10	70663917	70664077	+	AluJb	hg19|panTro5|gorGor3|ponAbe2|rheMac8	B0
chr10	70735829	70735992	+	AluJb	hg19|panTro5|gorGor3|ponAbe2|rheMac8	B0
chr10	70849369	70849709	+	AluSx3	hg19|panTro5|gorGor3|ponAbe2|rheMac8	B0
chr10	70852267	70852568	+	AluSz	hg19|panTro5|gorGor3|ponAbe2|rheMac8	B0
chr10	70954367	70954525	+	AluJb	hg19|panTro5|gorGor3|ponAbe2|rheMac8	B0
chr10	70988339	70988648	+	AluSz	hg19|panTro5|gorGor3|ponAbe2|rheMac8	B0
chr10	71074413	71074721	-	AluSg	hg19|panTro5|gorGor3|ponAbe2|rheMac8	B0
chr10	71139964	71140084	+	AluJr4	hg19|panTro5|gorGor3|ponAbe2|rheMac8	B0
chr10	71140776	71141062	+	AluJo	hg19|panTro5|gorGor3|ponAbe2|rheMac8	B0
chr10	71141863	71142151	+	AluJb	hg19|panTro5|gorGor3|ponAbe2|rheMac8	B0
chr10	71146257	71146575	+	AluSx	hg19|panTro5|gorGor3|ponAbe2|rheMac8	B0
chr10	71151116	71151419	+	AluJb	hg19|panTro5|gorGor3|ponAbe2|rheMac8	B0
chr10	71158985	71159285	+	AluJb	hg19|panTro5|gorGor3|ponAbe2|rheMac8	B0
chr10	71242751	71243043	-	AluY	hg19|panTro5|gorGor3|ponAbe2|rheMac8	B0
chr10	71852042	71852208	+	AluJo	hg19|panTro5|gorGor3|ponAbe2|rheMac8	B0
chr10	71901025	71901179	-	AluJr	hg19|panTro5|gorGor3|ponAbe2|rheMac8	B0
chr10	71928592	71928715	-	AluJb	hg19|panTro5|gorGor3|ponAbe2|rheMac8	B0
chr10	71989674	71989964	-	AluJb	hg19|panTro5|gorGor3|ponAbe2|rheMac8	B0
chr10	72050238	72050484	-	AluSz	hg19|panTro5|gorGor3|ponAbe2|rheMac8	B0
chr10	7210912	7211227	-	AluSx1	hg19|panTro5|gorGor3|ponAbe2|rheMac8	B0
chr10	72249675	72249978	-	AluSx1	hg19|panTro5|gorGor3|ponAbe2|rheMac8	B0
chr10	73509058	73509227	-	AluJr	hg19|panTro5|gorGor3|ponAbe2|rheMac8	B0
chr10	73527944	73528227	-	AluSx1	hg19|panTro5|gorGor3|ponAbe2|rheMac8	B0
chr10	73598996	73599294	-	AluSg	hg19|panTro5|gorGor3|ponAbe2|rheMac8	B0
chr10	73748638	73748948	+	AluSz	hg19|panTro5|gorGor3|ponAbe2|rheMac8	B0
chr10	73772124	73772233	+	AluJo	hg19|panTro5|gorGor3|ponAbe2|rheMac8	B0
chr10	7405316	7405607	-	AluSg	hg19|panTro5|gorGor3|ponAbe2|rheMac8	B0
chr10	74080048	74080208	+	AluJr	hg19|panTro5|gorGor3|ponAbe2|rheMac8	B0
chr10	74287109	74287406	-	AluJo	hg19|panTro5|gorGor3|ponAbe2|rheMac8	B0
chr10	74463380	74463648	+	AluSx	hg19|panTro5|gorGor3|ponAbe2|rheMac8	B0
chr10	74463677	74463694	+	AluSx	hg19|panTro5|gorGor3|ponAbe2|rheMac8	B0
chr10	74476359	74476643	+	AluJr	hg19|panTro5|gorGor3|ponAbe2|rheMac8	B0
chr10	74507307	74507596	+	AluJr	hg19|panTro5|gorGor3|ponAbe2|rheMac8	B0
chr10	74508747	74509056	+	AluJb	hg19|panTro5|gorGor3|ponAbe2|rheMac8	B0
chr10	74513350	74513659	+	AluJb	hg19|panTro5|gorGor3|ponAbe2|rheMac8	B0
chr10	74796163	74796455	-	AluJb	hg19|panTro5|gorGor3|ponAbe2|rheMac8	B0
chr10	74835542	74835628	-	AluSx	hg19|panTro5|gorGor3|ponAbe2|rheMac8	B0
chr10	74916806	74917107	-	AluSx1	hg19|panTro5|gorGor3|ponAbe2|rheMac8	B0
chr10	74948279	74948502	+	AluSg7	hg19|panTro5|gorGor3|ponAbe2|rheMac8	B0
chr10	75008708	75008970	-	AluJr	hg19|panTro5|gorGor3|ponAbe2|rheMac8	B0
chr10	75115965	75116253	-	AluJb	hg19|panTro5|gorGor3|ponAbe2|rheMac8	B0
chr10	75162583	75162879	-	AluSg4	hg19|panTro5|gorGor3|ponAbe2|rheMac8	B0
chr10	75191792	75192094	-	AluSg	hg19|panTro5|gorGor3|ponAbe2|rheMac8	B0
chr10	75254033	75254352	-	AluSz6	hg19|panTro5|gorGor3|ponAbe2|rheMac8	B0
chr10	75275536	75275839	-	AluSc8	hg19|panTro5|gorGor3|ponAbe2|rheMac8	B0
chr10	75293957	75294282	-	AluY	hg19|panTro5|gorGor3|ponAbe2|rheMac8	B0
chr10	75301868	75302157	-	AluSz6	hg19|panTro5|gorGor3|ponAbe2|rheMac8	B0
chr10	75317633	75317933	-	AluSc	hg19|panTro5|gorGor3|ponAbe2|rheMac8	B0
chr10	75322714	75323011	-	AluJr	hg19|panTro5|gorGor3|ponAbe2|rheMac8	B0
chr10	75323776	75324047	-	AluJo	hg19|panTro5|gorGor3|ponAbe2|rheMac8	B0
chr10	75386540	75386837	+	AluSc5	hg19|panTro5|gorGor3|ponAbe2|rheMac8	B0
chr10	75433006	75433178	-	AluY	hg19|panTro5|gorGor3|ponAbe2|rheMac8	B0
chr10	75527859	75528148	+	AluSx1	hg19|panTro5|gorGor3|ponAbe2|rheMac8	B0
chr10	75539039	75539337	+	AluSp	hg19|panTro5|gorGor3|ponAbe2|rheMac8	B0
chr10	75582617	75582919	-	AluSz	hg19|panTro5|gorGor3|ponAbe2|rheMac8	B0
chr10	75595055	75595348	-	AluJo	hg19|panTro5|gorGor3|ponAbe2|rheMac8	B0
chr10	75726400	75726683	+	AluSx	hg19|panTro5|gorGor3|ponAbe2|rheMac8	B0
chr10	75788875	75789170	-	AluY	hg19|panTro5|gorGor3|ponAbe2|rheMac8	B0
chr10	75804654	75804958	+	AluJb	hg19|panTro5|gorGor3|ponAbe2|rheMac8	B0
chr10	75806908	75807051	+	AluJb	hg19|panTro5|gorGor3|ponAbe2|rheMac8	B0
chr10	75818846	75819142	+	AluSx	hg19|panTro5|gorGor3|ponAbe2|rheMac8	B0
chr10	7601805	7602111	-	AluSc5	hg19|panTro5|gorGor3|ponAbe2|rheMac8	B0
chr10	76172534	76172828	+	AluSq2	hg19|panTro5|gorGor3|ponAbe2|rheMac8	B0
chr10	76235186	76235485	+	AluJb	hg19|panTro5|gorGor3|ponAbe2|rheMac8	B0
chr10	76301356	76301544	+	AluJo	hg19|panTro5|gorGor3|ponAbe2|rheMac8	B0
chr10	76449970	76450260	+	AluJb	hg19|panTro5|gorGor3|ponAbe2|rheMac8	B0
chr10	7659932	7660230	-	AluJo	hg19|panTro5|gorGor3|ponAbe2|rheMac8	B0
chr10	76616376	76616682	+	AluJb	hg19|panTro5|gorGor3|ponAbe2|rheMac8	B0
chr10	76629755	76630063	+	AluJb	hg19|panTro5|gorGor3|ponAbe2|rheMac8	B0
chr10	76647483	76647758	+	AluJo	hg19|panTro5|gorGor3|ponAbe2|rheMac8	B0
chr10	76777108	76777398	+	AluSx1	hg19|panTro5|gorGor3|ponAbe2|rheMac8	B0
chr10	76938504	76938814	+	AluSz	hg19|panTro5|gorGor3|ponAbe2|rheMac8	B0
chr10	76938821	76939100	+	AluJb	hg19|panTro5|gorGor3|ponAbe2|rheMac8	B0
chr10	76940058	76940348	+	AluSx4	hg19|panTro5|gorGor3|ponAbe2|rheMac8	B0
chr10	77200511	77200823	+	AluSq	hg19|panTro5|gorGor3|ponAbe2|rheMac8	B0
chr10	77270818	77271109	+	AluJb	hg19|panTro5|gorGor3|ponAbe2|rheMac8	B0
chr10	77450433	77450737	+	AluJr	hg19|panTro5|gorGor3|ponAbe2|rheMac8	B0
chr10	77561794	77562075	+	AluJb	hg19|panTro5|gorGor3|ponAbe2|rheMac8	B0
chr10	77569119	77569420	+	AluSx	hg19|panTro5|gorGor3|ponAbe2|rheMac8	B0
chr10	77863526	77863820	+	AluSg7	hg19|panTro5|gorGor3|ponAbe2|rheMac8	B0
chr10	78120736	78121039	+	AluSz	hg19|panTro5|gorGor3|ponAbe2|rheMac8	B0
chr10	78910974	78911284	-	AluSc	hg19|panTro5|gorGor3|ponAbe2|rheMac8	B0
chr10	79030284	79030548	-	AluSx3	hg19|panTro5|gorGor3|ponAbe2|rheMac8	B0
chr10	79125914	79126226	-	AluSq2	hg19|panTro5|gorGor3|ponAbe2|rheMac8	B0
chr10	79147394	79147675	-	AluSx1	hg19|panTro5|gorGor3|ponAbe2|rheMac8	B0
chr10	79268898	79269175	-	AluSx	hg19|panTro5|gorGor3|ponAbe2|rheMac8	B0
chr10	79317403	79317667	-	AluSq2	hg19|panTro5|gorGor3|ponAbe2|rheMac8	B0
chr10	79357717	79358028	-	AluSz	hg19|panTro5|gorGor3|ponAbe2|rheMac8	B0
chr10	79367935	79368231	-	AluJb	hg19|panTro5|gorGor3|ponAbe2|rheMac8	B0
chr10	79780735	79781024	-	AluJb	hg19|panTro5|gorGor3|ponAbe2|rheMac8	B0
chr10	80854429	80854740	+	AluJb	hg19|panTro5|gorGor3|ponAbe2|rheMac8	B0
chr10	80855985	80856296	+	AluY	hg19|panTro5|gorGor3|ponAbe2|rheMac8	B0
chr10	80957734	80958033	+	AluY	hg19|panTro5|gorGor3|ponAbe2|rheMac8	B0
chr10	81062940	81063235	+	AluJb	hg19|panTro5|gorGor3|ponAbe2|rheMac8	B0
chr10	8109499	8109810	+	AluY	hg19|panTro5|gorGor3|ponAbe2|rheMac8	B0
chr10	8110440	8110734	+	AluSx1	hg19|panTro5|gorGor3|ponAbe2|rheMac8	B0
chr10	81913691	81913859	-	AluJb	hg19|panTro5|gorGor3|ponAbe2|rheMac8	B0
chr10	81913859	81914157	-	AluSx	hg19|panTro5|gorGor3|ponAbe2|rheMac8	B0
chr10	81914157	81914285	-	AluJb	hg19|panTro5|gorGor3|ponAbe2|rheMac8	B0
chr10	81928273	81928592	-	AluJb	hg19|panTro5|gorGor3|ponAbe2|rheMac8	B0
chr10	81936737	81937027	-	AluSx1	hg19|panTro5|gorGor3|ponAbe2|rheMac8	B0
chr10	82192114	82192412	+	AluSx1	hg19|panTro5|gorGor3|ponAbe2|rheMac8	B0
chr10	82193605	82193900	+	AluSq	hg19|panTro5|gorGor3|ponAbe2|rheMac8	B0
chr10	82281478	82281686	+	AluY	hg19|panTro5|gorGor3|ponAbe2|rheMac8	B0
chr10	82281984	82282285	+	AluSz	hg19|panTro5|gorGor3|ponAbe2|rheMac8	B0
chr10	83653814	83654111	+	AluSz	hg19|panTro5|gorGor3|ponAbe2|rheMac8	B0
chr10	83760976	83761282	+	AluSx1	hg19|panTro5|gorGor3|ponAbe2|rheMac8	B0
chr10	83763627	83763709	+	AluJr	hg19|panTro5|gorGor3|ponAbe2|rheMac8	B0
chr10	83855950	83856251	+	AluSc	hg19|panTro5|gorGor3|ponAbe2|rheMac8	B0
chr10	84167544	84167802	+	AluSg	hg19|panTro5|gorGor3|ponAbe2|rheMac8	B0
chr10	8494624	8494880	-	AluJo	hg19|panTro5|gorGor3|ponAbe2|rheMac8	B0
chr10	85898199	85898506	-	AluSz	hg19|panTro5|gorGor3|ponAbe2|rheMac8	B0
chr10	85959646	85959943	+	AluSq2	hg19|panTro5|gorGor3|ponAbe2|rheMac8	B0
chr10	86208848	86209140	+	AluSx	hg19|panTro5|gorGor3|ponAbe2|rheMac8	B0
chr10	88224935	88225262	-	AluSx1	hg19|panTro5|gorGor3|ponAbe2|rheMac8	B0
chr10	88446290	88446593	+	AluJr	hg19|panTro5|gorGor3|ponAbe2|rheMac8	B0
chr10	88495254	88495558	+	AluSq2	hg19|panTro5|gorGor3|ponAbe2|rheMac8	B0
chr10	88669067	88669371	+	AluSz6	hg19|panTro5|gorGor3|ponAbe2|rheMac8	B0
chr10	88685996	88686305	+	AluSq4	hg19|panTro5|gorGor3|ponAbe2|rheMac8	B0
chr10	88788317	88788619	+	AluSx1	hg19|panTro5|gorGor3|ponAbe2|rheMac8	B0
chr10	888139	888435	-	AluSc5	hg19|panTro5|gorGor3|ponAbe2|rheMac8	B0
chr10	88836786	88837066	-	AluJb	hg19|panTro5|gorGor3|ponAbe2|rheMac8	B0
chr10	88857045	88857359	+	AluSx1	hg19|panTro5|gorGor3|ponAbe2|rheMac8	B0
chr10	89451557	89451714	+	AluJr	hg19|panTro5|gorGor3|ponAbe2|rheMac8	B0
chr10	89461189	89461481	-	AluJr	hg19|panTro5|gorGor3|ponAbe2|rheMac8	B0
chr10	89485906	89486208	+	AluSc	hg19|panTro5|gorGor3|ponAbe2|rheMac8	B0
chr10	89632751	89633050	+	AluJo	hg19|panTro5|gorGor3|ponAbe2|rheMac8	B0
chr10	89694416	89694714	+	AluSc	hg19|panTro5|gorGor3|ponAbe2|rheMac8	B0
chr10	89699918	89700180	+	AluJb	hg19|panTro5|gorGor3|ponAbe2|rheMac8	B0
chr10	89705945	89706062	+	AluSx	hg19|panTro5|gorGor3|ponAbe2|rheMac8	B0
chr10	89706091	89706228	+	AluSx	hg19|panTro5|gorGor3|ponAbe2|rheMac8	B0
chr10	89707366	89707676	+	AluSc8	hg19|panTro5|gorGor3|ponAbe2|rheMac8	B0
chr10	89718587	89718891	+	AluSq2	hg19|panTro5|gorGor3|ponAbe2|rheMac8	B0
chr10	89724018	89724292	+	AluJb	hg19|panTro5|gorGor3|ponAbe2|rheMac8	B0
chr10	90705853	90706152	-	AluJr	hg19|panTro5|gorGor3|ponAbe2|rheMac8	B0
chr10	90706156	90706447	-	AluJo	hg19|panTro5|gorGor3|ponAbe2|rheMac8	B0
chr10	909166	909468	-	AluY	hg19|panTro5|gorGor3|ponAbe2|rheMac8	B0
chr10	91190760	91191053	-	AluSc8	hg19|panTro5|gorGor3|ponAbe2|rheMac8	B0
chr10	92636792	92637074	+	AluSx1	hg19|panTro5|gorGor3|ponAbe2|rheMac8	B0
chr10	92681594	92681720	+	AluJo	hg19|panTro5|gorGor3|ponAbe2|rheMac8	B0
chr10	92928403	92928714	+	AluSx3	hg19|panTro5|gorGor3|ponAbe2|rheMac8	B0
chr10	92931899	92932189	+	AluSz	hg19|panTro5|gorGor3|ponAbe2|rheMac8	B0
chr10	92995698	92995865	+	AluJb	hg19|panTro5|gorGor3|ponAbe2|rheMac8	B0
chr10	93041959	93042249	+	AluSz	hg19|panTro5|gorGor3|ponAbe2|rheMac8	B0
chr10	93599815	93600121	+	AluSz	hg19|panTro5|gorGor3|ponAbe2|rheMac8	B0
chr10	93602248	93602546	+	AluJb	hg19|panTro5|gorGor3|ponAbe2|rheMac8	B0
chr10	93702804	93703088	+	AluSx1	hg19|panTro5|gorGor3|ponAbe2|rheMac8	B0
chr10	93991468	93991776	-	AluSx1	hg19|panTro5|gorGor3|ponAbe2|rheMac8	B0
chr10	94210186	94210493	-	AluSx1	hg19|panTro5|gorGor3|ponAbe2|rheMac8	B0
chr10	94231470	94231660	-	AluSz6	hg19|panTro5|gorGor3|ponAbe2|rheMac8	B0
chr10	94247863	94248152	-	AluSx4	hg19|panTro5|gorGor3|ponAbe2|rheMac8	B0
chr10	94413659	94413950	+	AluSz6	hg19|panTro5|gorGor3|ponAbe2|rheMac8	B0
chr10	95223030	95223151	+	AluJb	hg19|panTro5|gorGor3|ponAbe2|rheMac8	B0
chr10	95238895	95239042	-	AluSx3	hg19|panTro5|gorGor3|ponAbe2|rheMac8	B0
chr10	95829074	95829406	+	AluSz	hg19|panTro5|gorGor3|ponAbe2|rheMac8	B0
chr10	95883880	95884163	+	AluJr	hg19|panTro5|gorGor3|ponAbe2|rheMac8	B0
chr10	95906896	95907200	+	AluSx1	hg19|panTro5|gorGor3|ponAbe2|rheMac8	B0
chr10	95964143	95964439	+	AluSg7	hg19|panTro5|gorGor3|ponAbe2|rheMac8	B0
chr10	96157142	96157440	-	AluSc	hg19|panTro5|gorGor3|ponAbe2|rheMac8	B0
chr10	96182710	96182886	+	AluJo	hg19|panTro5|gorGor3|ponAbe2|rheMac8	B0
chr10	96252732	96252850	+	AluJo	hg19|panTro5|gorGor3|ponAbe2|rheMac8	B0
chr10	96280823	96280994	+	AluJb	hg19|panTro5|gorGor3|ponAbe2|rheMac8	B0
chr10	96338171	96338451	+	AluSz	hg19|panTro5|gorGor3|ponAbe2|rheMac8	B0
chr10	96354704	96354995	+	AluSg4	hg19|panTro5|gorGor3|ponAbe2|rheMac8	B0
chr10	96372400	96372686	+	AluSz	hg19|panTro5|gorGor3|ponAbe2|rheMac8	B0
chr10	96732165	96732476	+	AluSz6	hg19|panTro5|gorGor3|ponAbe2|rheMac8	B0
chr10	97008005	97008304	-	AluJr4	hg19|panTro5|gorGor3|ponAbe2|rheMac8	B0
chr10	97080137	97080434	-	AluSc	hg19|panTro5|gorGor3|ponAbe2|rheMac8	B0
chr10	97085311	97085611	-	AluSz	hg19|panTro5|gorGor3|ponAbe2|rheMac8	B0
chr10	97089001	97089263	-	AluJb	hg19|panTro5|gorGor3|ponAbe2|rheMac8	B0
chr10	97098470	97098764	-	AluSx1	hg19|panTro5|gorGor3|ponAbe2|rheMac8	B0
chr10	97100608	97100897	-	AluSx1	hg19|panTro5|gorGor3|ponAbe2|rheMac8	B0
chr10	97102197	97102492	-	AluJb	hg19|panTro5|gorGor3|ponAbe2|rheMac8	B0
chr10	97102640	97102930	-	AluSx3	hg19|panTro5|gorGor3|ponAbe2|rheMac8	B0
chr10	97104168	97104461	-	AluSz	hg19|panTro5|gorGor3|ponAbe2|rheMac8	B0
chr10	97107194	97107491	-	AluSz	hg19|panTro5|gorGor3|ponAbe2|rheMac8	B0
chr10	97107498	97107787	-	AluJb	hg19|panTro5|gorGor3|ponAbe2|rheMac8	B0
chr10	97109237	97109528	-	AluJr	hg19|panTro5|gorGor3|ponAbe2|rheMac8	B0
chr10	97109585	97109899	-	AluJo	hg19|panTro5|gorGor3|ponAbe2|rheMac8	B0
chr10	97113262	97113562	-	AluSx1	hg19|panTro5|gorGor3|ponAbe2|rheMac8	B0
chr10	97119167	97119292	-	AluJr	hg19|panTro5|gorGor3|ponAbe2|rheMac8	B0
chr10	97124213	97124508	-	AluSz6	hg19|panTro5|gorGor3|ponAbe2|rheMac8	B0
chr10	97126443	97126724	-	AluSx	hg19|panTro5|gorGor3|ponAbe2|rheMac8	B0
chr10	97147733	97148034	-	AluSx1	hg19|panTro5|gorGor3|ponAbe2|rheMac8	B0
chr10	97149162	97149312	-	AluJo	hg19|panTro5|gorGor3|ponAbe2|rheMac8	B0
chr10	97150387	97150703	-	AluSx1	hg19|panTro5|gorGor3|ponAbe2|rheMac8	B0
chr10	97156260	97156556	-	AluSp	hg19|panTro5|gorGor3|ponAbe2|rheMac8	B0
chr10	97162196	97162522	-	AluJb	hg19|panTro5|gorGor3|ponAbe2|rheMac8	B0
chr10	97177048	97177358	-	AluSc8	hg19|panTro5|gorGor3|ponAbe2|rheMac8	B0
chr10	97177379	97177658	-	AluSx3	hg19|panTro5|gorGor3|ponAbe2|rheMac8	B0
chr10	97177822	97178134	-	AluSz	hg19|panTro5|gorGor3|ponAbe2|rheMac8	B0
chr10	97178136	97178450	-	AluSq2	hg19|panTro5|gorGor3|ponAbe2|rheMac8	B0
chr10	97188920	97189216	-	AluSz	hg19|panTro5|gorGor3|ponAbe2|rheMac8	B0
chr10	97213087	97213394	-	AluSx	hg19|panTro5|gorGor3|ponAbe2|rheMac8	B0
chr10	97243274	97243582	-	AluSq2	hg19|panTro5|gorGor3|ponAbe2|rheMac8	B0
chr10	97267739	97267994	-	AluJo	hg19|panTro5|gorGor3|ponAbe2|rheMac8	B0
chr10	97270086	97270310	-	AluSx1	hg19|panTro5|gorGor3|ponAbe2|rheMac8	B0
chr10	97270959	97271271	-	AluJr	hg19|panTro5|gorGor3|ponAbe2|rheMac8	B0
chr10	97281185	97281339	-	AluSx	hg19|panTro5|gorGor3|ponAbe2|rheMac8	B0
chr10	97281414	97281713	-	AluJb	hg19|panTro5|gorGor3|ponAbe2|rheMac8	B0
chr10	97293852	97294158	-	AluSx1	hg19|panTro5|gorGor3|ponAbe2|rheMac8	B0
chr10	97306491	97306792	-	AluSx	hg19|panTro5|gorGor3|ponAbe2|rheMac8	B0
chr10	97308197	97308513	-	AluJb	hg19|panTro5|gorGor3|ponAbe2|rheMac8	B0
chr10	97314629	97314931	-	AluSq2	hg19|panTro5|gorGor3|ponAbe2|rheMac8	B0
chr10	97316125	97316294	-	AluSg7	hg19|panTro5|gorGor3|ponAbe2|rheMac8	B0
chr10	97389886	97390033	-	AluJb	hg19|panTro5|gorGor3|ponAbe2|rheMac8	B0
chr10	974541	974813	-	AluJb	hg19|panTro5|gorGor3|ponAbe2|rheMac8	B0
chr10	97738126	97738428	-	AluJo	hg19|panTro5|gorGor3|ponAbe2|rheMac8	B0
chr10	97900405	97900709	+	AluJb	hg19|panTro5|gorGor3|ponAbe2|rheMac8	B0
chr10	97911786	97912075	+	AluJb	hg19|panTro5|gorGor3|ponAbe2|rheMac8	B0
chr10	98001476	98001773	-	AluJb	hg19|panTro5|gorGor3|ponAbe2|rheMac8	B0
chr10	98296528	98296718	-	AluJb	hg19|panTro5|gorGor3|ponAbe2|rheMac8	B0
chr10	98454288	98454564	-	AluJo	hg19|panTro5|gorGor3|ponAbe2|rheMac8	B0
chr10	98606730	98607017	+	AluJb	hg19|panTro5|gorGor3|ponAbe2|rheMac8	B0
chr10	99220056	99220358	+	AluJb	hg19|panTro5|gorGor3|ponAbe2|rheMac8	B0
chr10	99255534	99255833	-	AluSz	hg19|panTro5|gorGor3|ponAbe2|rheMac8	B0
chr10	99423603	99423733	-	AluJr	hg19|panTro5|gorGor3|ponAbe2|rheMac8	B0
chr10	99426975	99427266	-	AluSz6	hg19|panTro5|gorGor3|ponAbe2|rheMac8	B0
chr10	99442910	99443215	-	AluSq	hg19|panTro5|gorGor3|ponAbe2|rheMac8	B0
chr10	99444245	99444556	-	AluSx1	hg19|panTro5|gorGor3|ponAbe2|rheMac8	B0
chr1	10001247	10001552	-	AluSx1	hg19|panTro5|gorGor3|ponAbe2|rheMac8	B0
chr1	100117877	100118157	+	AluSz	hg19|panTro5|gorGor3|ponAbe2|rheMac8	B0
chr1	100148292	100148561	+	AluSz	hg19|panTro5|gorGor3|ponAbe2|rheMac8	B0
chr1	10015179	10015488	+	AluSq2	hg19|panTro5|gorGor3|ponAbe2|rheMac8	B0
chr1	100197383	100197521	-	AluJo	hg19|panTro5|gorGor3|ponAbe2|rheMac8	B0
chr1	100475970	100476254	+	AluJb	hg19|panTro5|gorGor3|ponAbe2|rheMac8	B0
chr1	100489282	100489583	+	AluSc	hg19|panTro5|gorGor3|ponAbe2|rheMac8	B0
chr1	100489828	100490124	+	AluSg	hg19|panTro5|gorGor3|ponAbe2|rheMac8	B0
chr1	100599319	100599641	+	AluSz	hg19|panTro5|gorGor3|ponAbe2|rheMac8	B0
chr1	100745051	100745343	+	AluJr	hg19|panTro5|gorGor3|ponAbe2|rheMac8	B0
chr1	100756044	100756348	+	AluJb	hg19|panTro5|gorGor3|ponAbe2|rheMac8	B0
chr1	10098872	10099138	+	AluSg	hg19|panTro5|gorGor3|ponAbe2|rheMac8	B0
chr1	10191772	10192030	+	AluSq4	hg19|panTro5|gorGor3|ponAbe2|rheMac8	B0
chr1	10202448	10202736	+	AluSx	hg19|panTro5|gorGor3|ponAbe2|rheMac8	B0
chr1	10204511	10204819	+	AluSx3	hg19|panTro5|gorGor3|ponAbe2|rheMac8	B0
chr1	10215798	10216109	+	AluSx1	hg19|panTro5|gorGor3|ponAbe2|rheMac8	B0
chr1	10285261	10285541	+	AluJb	hg19|panTro5|gorGor3|ponAbe2|rheMac8	B0
chr1	10320646	10320943	+	AluSq2	hg19|panTro5|gorGor3|ponAbe2|rheMac8	B0
chr1	103371968	103372255	-	AluJb	hg19|panTro5|gorGor3|ponAbe2|rheMac8	B0
chr1	103487391	103487711	-	AluY	hg19|panTro5|gorGor3|ponAbe2|rheMac8	B0
chr1	104096697	104096975	+	AluJb	hg19|panTro5|gorGor3|ponAbe2|rheMac8	B0
chr1	10437714	10438008	+	AluSg	hg19|panTro5|gorGor3|ponAbe2|rheMac8	B0
chr1	10440483	10440777	+	AluSx	hg19|panTro5|gorGor3|ponAbe2|rheMac8	B0
chr1	10461055	10461276	+	AluSx	hg19|panTro5|gorGor3|ponAbe2|rheMac8	B0
chr1	10517204	10517422	-	AluJr4	hg19|panTro5|gorGor3|ponAbe2|rheMac8	B0
chr1	10518591	10518893	-	AluSx1	hg19|panTro5|gorGor3|ponAbe2|rheMac8	B0
chr1	10520964	10521264	-	AluY	hg19|panTro5|gorGor3|ponAbe2|rheMac8	B0
chr1	10605818	10606110	+	AluJr4	hg19|panTro5|gorGor3|ponAbe2|rheMac8	B0
chr1	1066807	1067095	-	AluY	hg19|panTro5|gorGor3|ponAbe2|rheMac8	B0
chr1	10778915	10779274	-	AluSz	hg19|panTro5|gorGor3|ponAbe2|rheMac8	B0
chr1	10809310	10809603	-	AluSc8	hg19|panTro5|gorGor3|ponAbe2|rheMac8	B0
chr1	10810319	10810624	-	AluJr	hg19|panTro5|gorGor3|ponAbe2|rheMac8	B0
chr1	108121227	108121369	-	AluYc	hg19|panTro5|gorGor3|ponAbe2|rheMac8	B0
chr1	108130236	108130514	-	AluSz	hg19|panTro5|gorGor3|ponAbe2|rheMac8	B0
chr1	108146430	108146574	-	AluSz6	hg19|panTro5|gorGor3|ponAbe2|rheMac8	B0
chr1	108149580	108149872	-	AluSx3	hg19|panTro5|gorGor3|ponAbe2|rheMac8	B0
chr1	10830129	10830441	-	AluJb	hg19|panTro5|gorGor3|ponAbe2|rheMac8	B0
chr1	109135497	109135797	+	AluSz	hg19|panTro5|gorGor3|ponAbe2|rheMac8	B0
chr1	109164498	109164806	+	AluSq2	hg19|panTro5|gorGor3|ponAbe2|rheMac8	B0
chr1	109422934	109423215	+	AluSx1	hg19|panTro5|gorGor3|ponAbe2|rheMac8	B0
chr1	109473097	109473229	+	AluJb	hg19|panTro5|gorGor3|ponAbe2|rheMac8	B0
chr1	109478106	109478397	+	AluJr	hg19|panTro5|gorGor3|ponAbe2|rheMac8	B0
chr1	109868673	109868973	-	AluJb	hg19|panTro5|gorGor3|ponAbe2|rheMac8	B0
chr1	109891110	109891413	-	AluJr	hg19|panTro5|gorGor3|ponAbe2|rheMac8	B0
chr1	109930860	109931162	-	AluJr	hg19|panTro5|gorGor3|ponAbe2|rheMac8	B0
chr1	109945315	109945626	-	AluSp	hg19|panTro5|gorGor3|ponAbe2|rheMac8	B0
chr1	109949620	109949908	-	AluY	hg19|panTro5|gorGor3|ponAbe2|rheMac8	B0
chr1	109951301	109951602	-	AluSx1	hg19|panTro5|gorGor3|ponAbe2|rheMac8	B0
chr1	109951777	109952078	-	AluSz6	hg19|panTro5|gorGor3|ponAbe2|rheMac8	B0
chr11	10047141	10047447	-	AluSx1	hg19|panTro5|gorGor3|ponAbe2|rheMac8	B0
chr11	10049501	10049760	-	AluJo	hg19|panTro5|gorGor3|ponAbe2|rheMac8	B0
chr11	100649895	100650199	+	AluSp	hg19|panTro5|gorGor3|ponAbe2|rheMac8	B0
chr11	100806587	100806864	+	AluJb	hg19|panTro5|gorGor3|ponAbe2|rheMac8	B0
chr11	101821952	101822271	+	AluJr4	hg19|panTro5|gorGor3|ponAbe2|rheMac8	B0
chr11	101871131	101871439	+	AluSz6	hg19|panTro5|gorGor3|ponAbe2|rheMac8	B0
chr11	101991886	101992197	+	AluJo	hg19|panTro5|gorGor3|ponAbe2|rheMac8	B0
chr11	101992868	101993180	+	AluSz	hg19|panTro5|gorGor3|ponAbe2|rheMac8	B0
chr11	102035807	102036107	+	AluJb	hg19|panTro5|gorGor3|ponAbe2|rheMac8	B0
chr11	102038486	102038783	+	AluJr	hg19|panTro5|gorGor3|ponAbe2|rheMac8	B0
chr11	102041417	102041722	+	AluSx1	hg19|panTro5|gorGor3|ponAbe2|rheMac8	B0
chr11	102042638	102042944	+	AluSq2	hg19|panTro5|gorGor3|ponAbe2|rheMac8	B0
chr11	102084526	102084819	+	AluSx	hg19|panTro5|gorGor3|ponAbe2|rheMac8	B0
chr11	102090817	102090933	+	AluJo	hg19|panTro5|gorGor3|ponAbe2|rheMac8	B0
chr11	102099083	102099395	+	AluSx	hg19|panTro5|gorGor3|ponAbe2|rheMac8	B0
chr11	102308779	102309080	-	AluSz	hg19|panTro5|gorGor3|ponAbe2|rheMac8	B0
chr1	110277797	110278096	-	AluJr	hg19|panTro5|gorGor3|ponAbe2|rheMac8	B0
chr1	110278255	110278562	-	AluSc	hg19|panTro5|gorGor3|ponAbe2|rheMac8	B0
chr1	110298854	110299152	-	AluSq	hg19|panTro5|gorGor3|ponAbe2|rheMac8	B0
chr11	103969229	103969509	-	AluJb	hg19|panTro5|gorGor3|ponAbe2|rheMac8	B0
chr11	103977474	103977772	-	AluSz	hg19|panTro5|gorGor3|ponAbe2|rheMac8	B0
chr11	104816569	104816867	-	AluSz6	hg19|panTro5|gorGor3|ponAbe2|rheMac8	B0
chr11	10535224	10535521	-	AluSx1	hg19|panTro5|gorGor3|ponAbe2|rheMac8	B0
chr11	105504793	105505109	+	AluSg	hg19|panTro5|gorGor3|ponAbe2|rheMac8	B0
chr11	105817032	105817329	+	AluJb	hg19|panTro5|gorGor3|ponAbe2|rheMac8	B0
chr11	10616477	10616771	-	AluSz6	hg19|panTro5|gorGor3|ponAbe2|rheMac8	B0
chr11	10618877	10619202	-	AluJr	hg19|panTro5|gorGor3|ponAbe2|rheMac8	B0
chr11	10629655	10629976	-	AluJr	hg19|panTro5|gorGor3|ponAbe2|rheMac8	B0
chr11	10651914	10652041	-	AluSx	hg19|panTro5|gorGor3|ponAbe2|rheMac8	B0
chr11	107189392	107189683	-	AluSc	hg19|panTro5|gorGor3|ponAbe2|rheMac8	B0
chr11	107491311	107491618	+	AluSc5	hg19|panTro5|gorGor3|ponAbe2|rheMac8	B0
chr11	107536406	107536743	+	AluSc	hg19|panTro5|gorGor3|ponAbe2|rheMac8	B0
chr11	107837508	107837812	+	AluY	hg19|panTro5|gorGor3|ponAbe2|rheMac8	B0
chr11	107936785	107937080	+	AluY	hg19|panTro5|gorGor3|ponAbe2|rheMac8	B0
chr11	107966540	107966837	+	AluSx1	hg19|panTro5|gorGor3|ponAbe2|rheMac8	B0
chr11	107987069	107987290	-	AluJr4	hg19|panTro5|gorGor3|ponAbe2|rheMac8	B0
chr11	108236458	108236781	+	AluSq2	hg19|panTro5|gorGor3|ponAbe2|rheMac8	B0
chr11	108343777	108344083	-	AluSz	hg19|panTro5|gorGor3|ponAbe2|rheMac8	B0
chr11	108403936	108404229	-	AluSg	hg19|panTro5|gorGor3|ponAbe2|rheMac8	B0
chr11	108411634	108411928	-	AluJb	hg19|panTro5|gorGor3|ponAbe2|rheMac8	B0
chr11	108427914	108427925	-	AluSz6	hg19|panTro5|gorGor3|ponAbe2|rheMac8	B0
chr11	10843600	10843874	-	AluSx1	hg19|panTro5|gorGor3|ponAbe2|rheMac8	B0
chr1	110865564	110865865	-	AluSz	hg19|panTro5|gorGor3|ponAbe2|rheMac8	B0
chr11	108758359	108758670	+	AluSx1	hg19|panTro5|gorGor3|ponAbe2|rheMac8	B0
chr1	11087998	11088284	+	AluSq	hg19|panTro5|gorGor3|ponAbe2|rheMac8	B0
chr11	110219384	110219513	+	AluJo	hg19|panTro5|gorGor3|ponAbe2|rheMac8	B0
chr11	111526624	111526920	+	AluJb	hg19|panTro5|gorGor3|ponAbe2|rheMac8	B0
chr11	111550566	111550856	+	AluSg	hg19|panTro5|gorGor3|ponAbe2|rheMac8	B0
chr11	111610950	111611186	-	AluSz	hg19|panTro5|gorGor3|ponAbe2|rheMac8	B0
chr11	111639404	111639552	-	AluJb	hg19|panTro5|gorGor3|ponAbe2|rheMac8	B0
chr11	111639595	111639625	-	AluJb	hg19|panTro5|gorGor3|ponAbe2|rheMac8	B0
chr11	111724818	111724986	-	AluSx3	hg19|panTro5|gorGor3|ponAbe2|rheMac8	B0
chr11	111892416	111892721	+	AluJr	hg19|panTro5|gorGor3|ponAbe2|rheMac8	B0
chr11	112013989	112014303	-	AluSp	hg19|panTro5|gorGor3|ponAbe2|rheMac8	B0
chr11	112014953	112015269	-	AluJr	hg19|panTro5|gorGor3|ponAbe2|rheMac8	B0
chr11	112024686	112024881	-	AluJo	hg19|panTro5|gorGor3|ponAbe2|rheMac8	B0
chr11	112116375	112116512	+	AluJr	hg19|panTro5|gorGor3|ponAbe2|rheMac8	B0
chr11	112896361	112896455	+	AluSx	hg19|panTro5|gorGor3|ponAbe2|rheMac8	B0
chr11	113949532	113949695	+	AluSx1	hg19|panTro5|gorGor3|ponAbe2|rheMac8	B0
chr11	113949704	113949850	+	AluSx	hg19|panTro5|gorGor3|ponAbe2|rheMac8	B0
chr11	113952721	113953001	+	AluJr	hg19|panTro5|gorGor3|ponAbe2|rheMac8	B0
chr11	113961821	113962093	+	AluJb	hg19|panTro5|gorGor3|ponAbe2|rheMac8	B0
chr11	113964755	113965067	+	AluY	hg19|panTro5|gorGor3|ponAbe2|rheMac8	B0
chr11	113989704	113990014	+	AluSx1	hg19|panTro5|gorGor3|ponAbe2|rheMac8	B0
chr11	114009398	114009712	-	AluSz	hg19|panTro5|gorGor3|ponAbe2|rheMac8	B0
chr11	114055611	114055731	+	AluJb	hg19|panTro5|gorGor3|ponAbe2|rheMac8	B0
chr11	114055767	114055954	+	AluJb	hg19|panTro5|gorGor3|ponAbe2|rheMac8	B0
chr11	114060250	114060502	+	AluSc5	hg19|panTro5|gorGor3|ponAbe2|rheMac8	B0
chr11	114068434	114068499	-	AluSz6	hg19|panTro5|gorGor3|ponAbe2|rheMac8	B0
chr11	114070568	114070879	+	AluY	hg19|panTro5|gorGor3|ponAbe2|rheMac8	B0
chr11	114137705	114138013	+	AluSx	hg19|panTro5|gorGor3|ponAbe2|rheMac8	B0
chr11	114147664	114147973	+	AluSx	hg19|panTro5|gorGor3|ponAbe2|rheMac8	B0
chr11	114152750	114152963	+	AluJr	hg19|panTro5|gorGor3|ponAbe2|rheMac8	B0
chr11	114181776	114182074	+	AluJr	hg19|panTro5|gorGor3|ponAbe2|rheMac8	B0
chr11	114183918	114184218	+	AluSz	hg19|panTro5|gorGor3|ponAbe2|rheMac8	B0
chr11	114189385	114189688	+	AluSz	hg19|panTro5|gorGor3|ponAbe2|rheMac8	B0
chr1	11143053	11143304	-	AluJb	hg19|panTro5|gorGor3|ponAbe2|rheMac8	B0
chr1	111432906	111433210	+	AluSx	hg19|panTro5|gorGor3|ponAbe2|rheMac8	B0
chr11	114410776	114410977	-	AluSx1	hg19|panTro5|gorGor3|ponAbe2|rheMac8	B0
chr11	114416413	114416709	-	AluSc	hg19|panTro5|gorGor3|ponAbe2|rheMac8	B0
chr11	114427618	114427915	-	AluSz	hg19|panTro5|gorGor3|ponAbe2|rheMac8	B0
chr11	114518417	114518721	-	AluSg4	hg19|panTro5|gorGor3|ponAbe2|rheMac8	B0
chr11	115190793	115191071	-	AluJr	hg19|panTro5|gorGor3|ponAbe2|rheMac8	B0
chr11	115226540	115226848	-	AluSg	hg19|panTro5|gorGor3|ponAbe2|rheMac8	B0
chr11	115232639	115232759	-	AluJb	hg19|panTro5|gorGor3|ponAbe2|rheMac8	B0
chr11	115302678	115302963	-	AluSc	hg19|panTro5|gorGor3|ponAbe2|rheMac8	B0
chr11	116648095	116648398	+	AluSx	hg19|panTro5|gorGor3|ponAbe2|rheMac8	B0
chr11	116749097	116749395	-	AluSz	hg19|panTro5|gorGor3|ponAbe2|rheMac8	B0
chr1	111675800	111676099	-	AluSx1	hg19|panTro5|gorGor3|ponAbe2|rheMac8	B0
chr11	116803853	116804154	-	AluSg	hg19|panTro5|gorGor3|ponAbe2|rheMac8	B0
chr11	116870316	116870440	-	AluSz	hg19|panTro5|gorGor3|ponAbe2|rheMac8	B0
chr11	116890334	116890533	-	AluSc8	hg19|panTro5|gorGor3|ponAbe2|rheMac8	B0
chr11	116903200	116903436	-	AluJo	hg19|panTro5|gorGor3|ponAbe2|rheMac8	B0
chr11	116934298	116934581	-	AluSx1	hg19|panTro5|gorGor3|ponAbe2|rheMac8	B0
chr11	116936773	116937083	-	AluSz	hg19|panTro5|gorGor3|ponAbe2|rheMac8	B0
chr11	116941462	116941744	-	AluSq2	hg19|panTro5|gorGor3|ponAbe2|rheMac8	B0
chr11	116949130	116949418	-	AluSx	hg19|panTro5|gorGor3|ponAbe2|rheMac8	B0
chr11	116954968	116955281	-	AluSx	hg19|panTro5|gorGor3|ponAbe2|rheMac8	B0
chr11	116955819	116956142	-	AluJr4	hg19|panTro5|gorGor3|ponAbe2|rheMac8	B0
chr11	116959386	116959697	-	AluJr	hg19|panTro5|gorGor3|ponAbe2|rheMac8	B0
chr1	111705969	111706243	+	AluJb	hg19|panTro5|gorGor3|ponAbe2|rheMac8	B0
chr11	117064760	117065033	+	AluJr	hg19|panTro5|gorGor3|ponAbe2|rheMac8	B0
chr11	117081471	117081662	+	AluJr	hg19|panTro5|gorGor3|ponAbe2|rheMac8	B0
chr11	117098165	117098454	-	AluSx4	hg19|panTro5|gorGor3|ponAbe2|rheMac8	B0
chr11	117175677	117175849	-	AluSx1	hg19|panTro5|gorGor3|ponAbe2|rheMac8	B0
chr1	111723503	111723799	+	AluSz	hg19|panTro5|gorGor3|ponAbe2|rheMac8	B0
chr11	117706961	117707238	-	AluJb	hg19|panTro5|gorGor3|ponAbe2|rheMac8	B0
chr11	117791078	117791220	-	AluSx3	hg19|panTro5|gorGor3|ponAbe2|rheMac8	B0
chr11	117878115	117878408	-	AluSc	hg19|panTro5|gorGor3|ponAbe2|rheMac8	B0
chr11	117967216	117967491	+	AluJb	hg19|panTro5|gorGor3|ponAbe2|rheMac8	B0
chr11	117986252	117986557	+	AluSz	hg19|panTro5|gorGor3|ponAbe2|rheMac8	B0
chr11	118357306	118357636	+	AluJr	hg19|panTro5|gorGor3|ponAbe2|rheMac8	B0
chr11	118631016	118631176	-	AluJo	hg19|panTro5|gorGor3|ponAbe2|rheMac8	B0
chr11	118637307	118637586	-	AluSz	hg19|panTro5|gorGor3|ponAbe2|rheMac8	B0
chr11	118637608	118637895	-	AluSx	hg19|panTro5|gorGor3|ponAbe2|rheMac8	B0
chr11	118808989	118809257	-	AluSz	hg19|panTro5|gorGor3|ponAbe2|rheMac8	B0
chr11	11881368	11881656	+	AluSz	hg19|panTro5|gorGor3|ponAbe2|rheMac8	B0
chr11	118890187	118890450	-	AluSx	hg19|panTro5|gorGor3|ponAbe2|rheMac8	B0
chr11	119179679	119179980	-	AluY	hg19|panTro5|gorGor3|ponAbe2|rheMac8	B0
chr11	119184874	119185165	-	AluJr	hg19|panTro5|gorGor3|ponAbe2|rheMac8	B0
chr11	11938414	11938704	+	AluJo	hg19|panTro5|gorGor3|ponAbe2|rheMac8	B0
chr11	11967201	11967517	+	AluJo	hg19|panTro5|gorGor3|ponAbe2|rheMac8	B0
chr11	12000088	12000223	-	AluJr	hg19|panTro5|gorGor3|ponAbe2|rheMac8	B0
chr1	112004239	112004540	+	AluSx1	hg19|panTro5|gorGor3|ponAbe2|rheMac8	B0
chr11	120092984	120093286	+	AluSx	hg19|panTro5|gorGor3|ponAbe2|rheMac8	B0
chr11	120131500	120131788	+	AluJb	hg19|panTro5|gorGor3|ponAbe2|rheMac8	B0
chr11	120134798	120134896	+	AluJb	hg19|panTro5|gorGor3|ponAbe2|rheMac8	B0
chr11	120171190	120171485	+	AluSz6	hg19|panTro5|gorGor3|ponAbe2|rheMac8	B0
chr11	120174760	120175068	+	AluJb	hg19|panTro5|gorGor3|ponAbe2|rheMac8	B0
chr11	120253567	120253863	+	AluY	hg19|panTro5|gorGor3|ponAbe2|rheMac8	B0
chr11	120318245	120318531	+	AluSz6	hg19|panTro5|gorGor3|ponAbe2|rheMac8	B0
chr11	120348291	120348600	+	AluSq2	hg19|panTro5|gorGor3|ponAbe2|rheMac8	B0
chr11	121183383	121183462	+	AluJo	hg19|panTro5|gorGor3|ponAbe2|rheMac8	B0
chr11	121345683	121345996	+	AluJb	hg19|panTro5|gorGor3|ponAbe2|rheMac8	B0
chr1	112136897	112137093	+	AluJb	hg19|panTro5|gorGor3|ponAbe2|rheMac8	B0
chr11	121455913	121456202	+	AluJo	hg19|panTro5|gorGor3|ponAbe2|rheMac8	B0
chr11	121482567	121482878	+	AluSx	hg19|panTro5|gorGor3|ponAbe2|rheMac8	B0
chr11	121601568	121601810	-	AluSx3	hg19|panTro5|gorGor3|ponAbe2|rheMac8	B0
chr11	12171883	12172000	+	AluJb	hg19|panTro5|gorGor3|ponAbe2|rheMac8	B0
chr1	112175252	112175566	+	AluSp	hg19|panTro5|gorGor3|ponAbe2|rheMac8	B0
chr11	12189566	12189695	+	AluJr	hg19|panTro5|gorGor3|ponAbe2|rheMac8	B0
chr11	12190363	12190523	+	AluJr	hg19|panTro5|gorGor3|ponAbe2|rheMac8	B0
chr11	12196386	12196680	+	AluJb	hg19|panTro5|gorGor3|ponAbe2|rheMac8	B0
chr11	121988893	121989206	-	AluSq	hg19|panTro5|gorGor3|ponAbe2|rheMac8	B0
chr11	121996449	121996744	-	AluJo	hg19|panTro5|gorGor3|ponAbe2|rheMac8	B0
chr11	122017968	122018214	-	AluSg	hg19|panTro5|gorGor3|ponAbe2|rheMac8	B0
chr11	122093814	122094121	-	AluSz	hg19|panTro5|gorGor3|ponAbe2|rheMac8	B0
chr11	12216526	12216830	+	AluJr	hg19|panTro5|gorGor3|ponAbe2|rheMac8	B0
chr11	12249601	12249891	+	AluSq2	hg19|panTro5|gorGor3|ponAbe2|rheMac8	B0
chr11	12253989	12254292	+	AluSz6	hg19|panTro5|gorGor3|ponAbe2|rheMac8	B0
chr11	122943019	122943114	-	AluSx	hg19|panTro5|gorGor3|ponAbe2|rheMac8	B0
chr11	122953021	122953307	-	AluSx3	hg19|panTro5|gorGor3|ponAbe2|rheMac8	B0
chr11	122961803	122962108	-	AluSz	hg19|panTro5|gorGor3|ponAbe2|rheMac8	B0
chr11	122992562	122992745	-	AluJo	hg19|panTro5|gorGor3|ponAbe2|rheMac8	B0
chr11	123049669	123049794	-	AluJr	hg19|panTro5|gorGor3|ponAbe2|rheMac8	B0
chr11	123053933	123054238	-	AluSx1	hg19|panTro5|gorGor3|ponAbe2|rheMac8	B0
chr1	112316031	112316342	-	AluSx1	hg19|panTro5|gorGor3|ponAbe2|rheMac8	B0
chr11	123231544	123231822	-	AluSq4	hg19|panTro5|gorGor3|ponAbe2|rheMac8	B0
chr11	123360602	123360729	+	AluJb	hg19|panTro5|gorGor3|ponAbe2|rheMac8	B0
chr11	123510079	123510385	-	AluSq	hg19|panTro5|gorGor3|ponAbe2|rheMac8	B0
chr11	123604276	123604446	-	AluJr	hg19|panTro5|gorGor3|ponAbe2|rheMac8	B0
chr11	124503959	124504247	+	AluSc8	hg19|panTro5|gorGor3|ponAbe2|rheMac8	B0
chr11	12503891	12504191	+	AluSx1	hg19|panTro5|gorGor3|ponAbe2|rheMac8	B0
chr11	12511788	12512091	+	AluSx	hg19|panTro5|gorGor3|ponAbe2|rheMac8	B0
chr1	112512626	112512900	-	AluSq2	hg19|panTro5|gorGor3|ponAbe2|rheMac8	B0
chr11	125451811	125452105	+	AluSx	hg19|panTro5|gorGor3|ponAbe2|rheMac8	B0
chr11	12555433	12555741	+	AluSc8	hg19|panTro5|gorGor3|ponAbe2|rheMac8	B0
chr11	126144261	126144556	+	AluSx	hg19|panTro5|gorGor3|ponAbe2|rheMac8	B0
chr11	126264319	126264619	-	AluJb	hg19|panTro5|gorGor3|ponAbe2|rheMac8	B0
chr11	12730602	12730905	+	AluSz	hg19|panTro5|gorGor3|ponAbe2|rheMac8	B0
chr11	128570496	128570780	+	AluJb	hg19|panTro5|gorGor3|ponAbe2|rheMac8	B0
chr11	128572474	128572786	+	AluSx4	hg19|panTro5|gorGor3|ponAbe2|rheMac8	B0
chr11	128658082	128658385	+	AluSx	hg19|panTro5|gorGor3|ponAbe2|rheMac8	B0
chr11	128805403	128805498	-	AluSx	hg19|panTro5|gorGor3|ponAbe2|rheMac8	B0
chr11	129064854	129065174	-	AluSz	hg19|panTro5|gorGor3|ponAbe2|rheMac8	B0
chr11	129109935	129110057	-	AluSx	hg19|panTro5|gorGor3|ponAbe2|rheMac8	B0
chr11	129262883	129263149	+	AluJo	hg19|panTro5|gorGor3|ponAbe2|rheMac8	B0
chr1	11296566	11296867	-	AluSx1	hg19|panTro5|gorGor3|ponAbe2|rheMac8	B0
chr11	129689926	129690235	+	AluSq	hg19|panTro5|gorGor3|ponAbe2|rheMac8	B0
chr11	129697416	129697712	+	AluSp	hg19|panTro5|gorGor3|ponAbe2|rheMac8	B0
chr11	129704044	129704341	+	AluSz	hg19|panTro5|gorGor3|ponAbe2|rheMac8	B0
chr11	129729452	129729721	+	AluY	hg19|panTro5|gorGor3|ponAbe2|rheMac8	B0
chr1	112974480	112974575	+	AluJr	hg19|panTro5|gorGor3|ponAbe2|rheMac8	B0
chr11	129975026	129975319	+	AluJb	hg19|panTro5|gorGor3|ponAbe2|rheMac8	B0
chr1	113001311	113001442	+	AluJr	hg19|panTro5|gorGor3|ponAbe2|rheMac8	B0
chr1	113004684	113004977	+	AluY	hg19|panTro5|gorGor3|ponAbe2|rheMac8	B0
chr1	113005943	113006239	+	AluSz	hg19|panTro5|gorGor3|ponAbe2|rheMac8	B0
chr11	130074424	130074721	+	AluSx	hg19|panTro5|gorGor3|ponAbe2|rheMac8	B0
chr11	130334580	130334891	+	AluJb	hg19|panTro5|gorGor3|ponAbe2|rheMac8	B0
chr1	113035963	113036264	+	AluJr	hg19|panTro5|gorGor3|ponAbe2|rheMac8	B0
chr11	130743914	130744216	-	AluJo	hg19|panTro5|gorGor3|ponAbe2|rheMac8	B0
chr11	131610780	131611055	+	AluSx1	hg19|panTro5|gorGor3|ponAbe2|rheMac8	B0
chr1	113166948	113167253	+	AluSx	hg19|panTro5|gorGor3|ponAbe2|rheMac8	B0
chr1	113188437	113188599	+	AluJr	hg19|panTro5|gorGor3|ponAbe2|rheMac8	B0
chr1	113194455	113194740	+	AluSx	hg19|panTro5|gorGor3|ponAbe2|rheMac8	B0
chr1	113194821	113195118	+	AluSp	hg19|panTro5|gorGor3|ponAbe2|rheMac8	B0
chr1	113207275	113207565	+	AluSq2	hg19|panTro5|gorGor3|ponAbe2|rheMac8	B0
chr11	133061432	133061688	-	AluSq2	hg19|panTro5|gorGor3|ponAbe2|rheMac8	B0
chr11	134103335	134103636	+	AluSc8	hg19|panTro5|gorGor3|ponAbe2|rheMac8	B0
chr11	13436654	13436793	-	AluJb	hg19|panTro5|gorGor3|ponAbe2|rheMac8	B0
chr11	13468730	13468812	-	AluJr	hg19|panTro5|gorGor3|ponAbe2|rheMac8	B0
chr11	13468813	13468948	-	AluJr	hg19|panTro5|gorGor3|ponAbe2|rheMac8	B0
chr11	13718724	13719026	+	AluSz	hg19|panTro5|gorGor3|ponAbe2|rheMac8	B0
chr11	13723007	13723080	+	AluJr	hg19|panTro5|gorGor3|ponAbe2|rheMac8	B0
chr11	13725308	13725611	+	AluSq2	hg19|panTro5|gorGor3|ponAbe2|rheMac8	B0
chr11	13729670	13729929	+	AluSx3	hg19|panTro5|gorGor3|ponAbe2|rheMac8	B0
chr1	113948778	113949096	+	AluJo	hg19|panTro5|gorGor3|ponAbe2|rheMac8	B0
chr1	113973741	113973924	+	AluJr4	hg19|panTro5|gorGor3|ponAbe2|rheMac8	B0
chr1	113976909	113977025	+	AluJo	hg19|panTro5|gorGor3|ponAbe2|rheMac8	B0
chr1	113987942	113988233	+	AluJr	hg19|panTro5|gorGor3|ponAbe2|rheMac8	B0
chr1	114229158	114229461	+	AluSx1	hg19|panTro5|gorGor3|ponAbe2|rheMac8	B0
chr1	114392535	114392819	+	AluSx	hg19|panTro5|gorGor3|ponAbe2|rheMac8	B0
chr1	114421465	114421770	-	AluSq2	hg19|panTro5|gorGor3|ponAbe2|rheMac8	B0
chr11	14484854	14485165	-	AluSx	hg19|panTro5|gorGor3|ponAbe2|rheMac8	B0
chr11	14490535	14490836	-	AluJr	hg19|panTro5|gorGor3|ponAbe2|rheMac8	B0
chr11	146387	146550	-	AluJb	hg19|panTro5|gorGor3|ponAbe2|rheMac8	B0
chr11	14675262	14675551	+	AluJb	hg19|panTro5|gorGor3|ponAbe2|rheMac8	B0
chr1	115126882	115127196	-	AluSx1	hg19|panTro5|gorGor3|ponAbe2|rheMac8	B0
chr1	115127402	115127522	-	AluJr	hg19|panTro5|gorGor3|ponAbe2|rheMac8	B0
chr1	115131395	115131514	-	AluJo	hg19|panTro5|gorGor3|ponAbe2|rheMac8	B0
chr1	115171902	115172199	-	AluSq2	hg19|panTro5|gorGor3|ponAbe2|rheMac8	B0
chr1	115209086	115209373	-	AluSc5	hg19|panTro5|gorGor3|ponAbe2|rheMac8	B0
chr1	115248250	115248409	-	AluSx3	hg19|panTro5|gorGor3|ponAbe2|rheMac8	B0
chr1	115255794	115256084	-	AluJo	hg19|panTro5|gorGor3|ponAbe2|rheMac8	B0
chr1	115396779	115397054	-	AluJo	hg19|panTro5|gorGor3|ponAbe2|rheMac8	B0
chr1	11607431	11607589	+	AluJo	hg19|panTro5|gorGor3|ponAbe2|rheMac8	B0
chr11	16185528	16185814	-	AluJr	hg19|panTro5|gorGor3|ponAbe2|rheMac8	B0
chr11	16218367	16218675	-	AluSx1	hg19|panTro5|gorGor3|ponAbe2|rheMac8	B0
chr11	16336478	16336764	-	AluSc8	hg19|panTro5|gorGor3|ponAbe2|rheMac8	B0
chr11	16616225	16616538	-	AluY	hg19|panTro5|gorGor3|ponAbe2|rheMac8	B0
chr11	16840338	16840649	-	AluSc8	hg19|panTro5|gorGor3|ponAbe2|rheMac8	B0
chr11	16851521	16851830	-	AluJr	hg19|panTro5|gorGor3|ponAbe2|rheMac8	B0
chr11	1689857	1690185	+	AluSx	hg19|panTro5|gorGor3|ponAbe2|rheMac8	B0
chr11	16900157	16900314	-	AluSx	hg19|panTro5|gorGor3|ponAbe2|rheMac8	B0
chr1	116913906	116914216	-	AluSc5	hg19|panTro5|gorGor3|ponAbe2|rheMac8	B0
chr1	116924516	116924808	+	AluSg7	hg19|panTro5|gorGor3|ponAbe2|rheMac8	B0
chr11	1699576	1699877	-	AluSx3	hg19|panTro5|gorGor3|ponAbe2|rheMac8	B0
chr11	17009984	17010292	-	AluSq2	hg19|panTro5|gorGor3|ponAbe2|rheMac8	B0
chr11	17018201	17018495	+	AluY	hg19|panTro5|gorGor3|ponAbe2|rheMac8	B0
chr11	17037090	17037378	+	AluSx1	hg19|panTro5|gorGor3|ponAbe2|rheMac8	B0
chr1	117058736	117058814	-	AluJr	hg19|panTro5|gorGor3|ponAbe2|rheMac8	B0
chr11	17067062	17067342	+	AluSx3	hg19|panTro5|gorGor3|ponAbe2|rheMac8	B0
chr11	17097946	17098118	+	AluSq2	hg19|panTro5|gorGor3|ponAbe2|rheMac8	B0
chr11	17109795	17110088	-	AluSq2	hg19|panTro5|gorGor3|ponAbe2|rheMac8	B0
chr11	17144795	17145106	-	AluJb	hg19|panTro5|gorGor3|ponAbe2|rheMac8	B0
chr11	17145605	17145678	-	AluJo	hg19|panTro5|gorGor3|ponAbe2|rheMac8	B0
chr11	17149851	17150085	-	AluSz	hg19|panTro5|gorGor3|ponAbe2|rheMac8	B0
chr11	17162813	17162995	-	AluSx	hg19|panTro5|gorGor3|ponAbe2|rheMac8	B0
chr11	17561367	17561677	-	AluJo	hg19|panTro5|gorGor3|ponAbe2|rheMac8	B0
chr1	11781896	11782185	+	AluSx1	hg19|panTro5|gorGor3|ponAbe2|rheMac8	B0
chr1	11785176	11785400	+	AluJr	hg19|panTro5|gorGor3|ponAbe2|rheMac8	B0
chr1	118006706	118006992	+	AluSz	hg19|panTro5|gorGor3|ponAbe2|rheMac8	B0
chr11	18268074	18268366	-	AluSx1	hg19|panTro5|gorGor3|ponAbe2|rheMac8	B0
chr11	18300628	18300881	-	AluJr	hg19|panTro5|gorGor3|ponAbe2|rheMac8	B0
chr11	18370947	18371250	+	AluSz	hg19|panTro5|gorGor3|ponAbe2|rheMac8	B0
chr1	118427471	118427778	-	AluJb	hg19|panTro5|gorGor3|ponAbe2|rheMac8	B0
chr1	11846483	11846800	-	AluJo	hg19|panTro5|gorGor3|ponAbe2|rheMac8	B0
chr11	18538597	18538817	-	AluJr	hg19|panTro5|gorGor3|ponAbe2|rheMac8	B0
chr11	18552097	18552269	-	AluJo	hg19|panTro5|gorGor3|ponAbe2|rheMac8	B0
chr11	18552273	18552571	-	AluY	hg19|panTro5|gorGor3|ponAbe2|rheMac8	B0
chr1	11858337	11858452	-	AluJo	hg19|panTro5|gorGor3|ponAbe2|rheMac8	B0
chr11	18607173	18607481	-	AluSx1	hg19|panTro5|gorGor3|ponAbe2|rheMac8	B0
chr11	18628412	18628709	-	AluSz	hg19|panTro5|gorGor3|ponAbe2|rheMac8	B0
chr11	18690409	18690722	+	AluSq2	hg19|panTro5|gorGor3|ponAbe2|rheMac8	B0
chr1	11905147	11905441	-	AluJb	hg19|panTro5|gorGor3|ponAbe2|rheMac8	B0
chr1	11919931	11920186	+	AluYc	hg19|panTro5|gorGor3|ponAbe2|rheMac8	B0
chr11	19550196	19550496	+	AluSc	hg19|panTro5|gorGor3|ponAbe2|rheMac8	B0
chr1	119701154	119701447	+	AluSg	hg19|panTro5|gorGor3|ponAbe2|rheMac8	B0
chr11	19753551	19753820	+	AluSx	hg19|panTro5|gorGor3|ponAbe2|rheMac8	B0
chr11	19760527	19760742	+	AluJb	hg19|panTro5|gorGor3|ponAbe2|rheMac8	B0
chr11	19783506	19783809	+	AluSx	hg19|panTro5|gorGor3|ponAbe2|rheMac8	B0
chr11	19950518	19950817	+	AluSz	hg19|panTro5|gorGor3|ponAbe2|rheMac8	B0
chr11	19964250	19964540	+	AluJr	hg19|panTro5|gorGor3|ponAbe2|rheMac8	B0
chr11	19976670	19976947	+	AluJb	hg19|panTro5|gorGor3|ponAbe2|rheMac8	B0
chr11	19996051	19996317	+	AluJr	hg19|panTro5|gorGor3|ponAbe2|rheMac8	B0
chr11	1999701	2000000	+	AluSp	hg19|panTro5|gorGor3|ponAbe2|rheMac8	B0
chr11	20007885	20008189	+	AluSx	hg19|panTro5|gorGor3|ponAbe2|rheMac8	B0
chr11	20029630	20029911	+	AluSx	hg19|panTro5|gorGor3|ponAbe2|rheMac8	B0
chr11	20038259	20038581	+	AluSz6	hg19|panTro5|gorGor3|ponAbe2|rheMac8	B0
chr11	20067600	20067900	+	AluSx3	hg19|panTro5|gorGor3|ponAbe2|rheMac8	B0
chr1	1201031	1201310	-	AluSc	hg19|panTro5|gorGor3|ponAbe2|rheMac8	B0
chr11	20106453	20106756	+	AluJr	hg19|panTro5|gorGor3|ponAbe2|rheMac8	B0
chr11	20144193	20144502	+	AluSz6	hg19|panTro5|gorGor3|ponAbe2|rheMac8	B0
chr1	120147082	120147386	-	AluJb	hg19|panTro5|gorGor3|ponAbe2|rheMac8	B0
chr1	120293977	120294329	-	AluSz	hg19|panTro5|gorGor3|ponAbe2|rheMac8	B0
chr1	120296500	120296681	-	AluJb	hg19|panTro5|gorGor3|ponAbe2|rheMac8	B0
chr1	120296681	120296972	-	AluSz6	hg19|panTro5|gorGor3|ponAbe2|rheMac8	B0
chr1	120297631	120297930	-	AluJo	hg19|panTro5|gorGor3|ponAbe2|rheMac8	B0
chr1	120348591	120348863	-	AluJb	hg19|panTro5|gorGor3|ponAbe2|rheMac8	B0
chr1	120485496	120485719	-	AluSx1	hg19|panTro5|gorGor3|ponAbe2|rheMac8	B0
chr1	121132619	121132931	+	AluSx1	hg19|panTro5|gorGor3|ponAbe2|rheMac8	B0
chr1	12267684	12267981	+	AluSx1	hg19|panTro5|gorGor3|ponAbe2|rheMac8	B0
chr1	12369538	12369848	+	AluSg	hg19|panTro5|gorGor3|ponAbe2|rheMac8	B0
chr1	12372532	12372799	+	AluJr	hg19|panTro5|gorGor3|ponAbe2|rheMac8	B0
chr1	12471405	12471527	+	AluJo	hg19|panTro5|gorGor3|ponAbe2|rheMac8	B0
chr1	12492168	12492470	+	AluSp	hg19|panTro5|gorGor3|ponAbe2|rheMac8	B0
chr1	12634192	12634499	-	AluJb	hg19|panTro5|gorGor3|ponAbe2|rheMac8	B0
chr1	12649389	12649603	-	AluSx	hg19|panTro5|gorGor3|ponAbe2|rheMac8	B0
chr1	12667901	12668181	-	AluSz	hg19|panTro5|gorGor3|ponAbe2|rheMac8	B0
chr11	268491	268802	-	AluSx1	hg19|panTro5|gorGor3|ponAbe2|rheMac8	B0
chr11	27180304	27180437	-	AluY	hg19|panTro5|gorGor3|ponAbe2|rheMac8	B0
chr11	27328637	27328929	-	AluJb	hg19|panTro5|gorGor3|ponAbe2|rheMac8	B0
chr11	27393399	27393711	-	AluJr	hg19|panTro5|gorGor3|ponAbe2|rheMac8	B0
chr11	27394415	27394708	-	AluJr	hg19|panTro5|gorGor3|ponAbe2|rheMac8	B0
chr11	27420442	27420763	-	AluSq2	hg19|panTro5|gorGor3|ponAbe2|rheMac8	B0
chr11	27446873	27447159	-	AluJr	hg19|panTro5|gorGor3|ponAbe2|rheMac8	B0
chr11	27449683	27449985	-	AluSx1	hg19|panTro5|gorGor3|ponAbe2|rheMac8	B0
chr11	27476590	27476773	-	AluJo	hg19|panTro5|gorGor3|ponAbe2|rheMac8	B0
chr11	27481024	27481320	-	AluSg4	hg19|panTro5|gorGor3|ponAbe2|rheMac8	B0
chr11	27636504	27636812	-	AluSz6	hg19|panTro5|gorGor3|ponAbe2|rheMac8	B0
chr11	27649088	27649400	-	AluJo	hg19|panTro5|gorGor3|ponAbe2|rheMac8	B0
chr11	28237310	28237553	+	AluJo	hg19|panTro5|gorGor3|ponAbe2|rheMac8	B0
chr11	28262798	28263107	+	AluY	hg19|panTro5|gorGor3|ponAbe2|rheMac8	B0
chr11	28354218	28354513	+	AluSz6	hg19|panTro5|gorGor3|ponAbe2|rheMac8	B0
chr11	2995010	2995296	-	AluJb	hg19|panTro5|gorGor3|ponAbe2|rheMac8	B0
chr11	3007856	3008154	-	AluSq	hg19|panTro5|gorGor3|ponAbe2|rheMac8	B0
chr11	31231977	31232287	+	AluSg	hg19|panTro5|gorGor3|ponAbe2|rheMac8	B0
chr11	316554	316634	+	AluSz6	hg19|panTro5|gorGor3|ponAbe2|rheMac8	B0
chr11	31731890	31732187	+	AluSz	hg19|panTro5|gorGor3|ponAbe2|rheMac8	B0
chr11	32350581	32350860	+	AluSq2	hg19|panTro5|gorGor3|ponAbe2|rheMac8	B0
chr11	32875115	32875403	+	AluSg	hg19|panTro5|gorGor3|ponAbe2|rheMac8	B0
chr11	32875819	32876124	+	AluSx1	hg19|panTro5|gorGor3|ponAbe2|rheMac8	B0
chr11	32919744	32920028	+	AluJb	hg19|panTro5|gorGor3|ponAbe2|rheMac8	B0
chr11	32929361	32929672	+	AluJo	hg19|panTro5|gorGor3|ponAbe2|rheMac8	B0
chr11	32934172	32934464	+	AluJr	hg19|panTro5|gorGor3|ponAbe2|rheMac8	B0
chr11	32945827	32946125	+	AluJb	hg19|panTro5|gorGor3|ponAbe2|rheMac8	B0
chr11	33287978	33288285	+	AluJb	hg19|panTro5|gorGor3|ponAbe2|rheMac8	B0
chr11	33303647	33303942	+	AluJr	hg19|panTro5|gorGor3|ponAbe2|rheMac8	B0
chr11	33310710	33311001	+	AluJr4	hg19|panTro5|gorGor3|ponAbe2|rheMac8	B0
chr11	33315430	33315718	+	AluSx1	hg19|panTro5|gorGor3|ponAbe2|rheMac8	B0
chr11	33321289	33321597	+	AluJb	hg19|panTro5|gorGor3|ponAbe2|rheMac8	B0
chr11	33333271	33333384	+	AluJo	hg19|panTro5|gorGor3|ponAbe2|rheMac8	B0
chr11	33338086	33338384	+	AluJr	hg19|panTro5|gorGor3|ponAbe2|rheMac8	B0
chr11	33363363	33363673	+	AluSx3	hg19|panTro5|gorGor3|ponAbe2|rheMac8	B0
chr11	33371935	33372219	+	AluJr	hg19|panTro5|gorGor3|ponAbe2|rheMac8	B0
chr11	33718646	33718800	-	AluJr	hg19|panTro5|gorGor3|ponAbe2|rheMac8	B0
chr11	33736482	33736623	-	AluSx4	hg19|panTro5|gorGor3|ponAbe2|rheMac8	B0
chr11	34081460	34081765	+	AluSx	hg19|panTro5|gorGor3|ponAbe2|rheMac8	B0
chr1	1343097	1343333	-	AluSx3	hg19|panTro5|gorGor3|ponAbe2|rheMac8	B0
chr11	35220243	35220531	+	AluY	hg19|panTro5|gorGor3|ponAbe2|rheMac8	B0
chr11	35247081	35247400	+	AluSx1	hg19|panTro5|gorGor3|ponAbe2|rheMac8	B0
chr11	354215	354527	+	AluY	hg19|panTro5|gorGor3|ponAbe2|rheMac8	B0
chr11	3592465	3592683	-	AluSg	hg19|panTro5|gorGor3|ponAbe2|rheMac8	B0
chr11	36392149	36392454	+	AluSx3	hg19|panTro5|gorGor3|ponAbe2|rheMac8	B0
chr11	36407563	36407852	+	AluJr	hg19|panTro5|gorGor3|ponAbe2|rheMac8	B0
chr11	36537857	36538171	-	AluY	hg19|panTro5|gorGor3|ponAbe2|rheMac8	B0
chr11	3757170	3757306	-	AluJb	hg19|panTro5|gorGor3|ponAbe2|rheMac8	B0
chr11	3907951	3908249	+	AluSc8	hg19|panTro5|gorGor3|ponAbe2|rheMac8	B0
chr1	14097944	14098243	+	AluY	hg19|panTro5|gorGor3|ponAbe2|rheMac8	B0
chr1	143135357	143135666	-	AluSp	hg19|panTro5|gorGor3|ponAbe2|rheMac8	B0
chr11	43346020	43346145	+	AluJr	hg19|panTro5|gorGor3|ponAbe2|rheMac8	B0
chr11	43412666	43412965	+	AluJr	hg19|panTro5|gorGor3|ponAbe2|rheMac8	B0
chr11	43420933	43421240	+	AluJr	hg19|panTro5|gorGor3|ponAbe2|rheMac8	B0
chr11	43423246	43423581	+	AluJb	hg19|panTro5|gorGor3|ponAbe2|rheMac8	B0
chr11	43474204	43474487	+	AluJr	hg19|panTro5|gorGor3|ponAbe2|rheMac8	B0
chr11	43733697	43733999	+	AluSc5	hg19|panTro5|gorGor3|ponAbe2|rheMac8	B0
chr1	14374083	14374414	+	AluSz	hg19|panTro5|gorGor3|ponAbe2|rheMac8	B0
chr11	43878974	43879285	+	AluSg	hg19|panTro5|gorGor3|ponAbe2|rheMac8	B0
chr1	143923901	143924210	+	AluSx1	hg19|panTro5|gorGor3|ponAbe2|rheMac8	B0
chr1	143951142	143951424	+	AluJo	hg19|panTro5|gorGor3|ponAbe2|rheMac8	B0
chr11	44109609	44109915	+	AluSx1	hg19|panTro5|gorGor3|ponAbe2|rheMac8	B0
chr1	144898258	144898360	-	AluSq2	hg19|panTro5|gorGor3|ponAbe2|rheMac8	B0
chr1	144939595	144939898	-	AluSg	hg19|panTro5|gorGor3|ponAbe2|rheMac8	B0
chr1	145072207	145072517	-	AluSz	hg19|panTro5|gorGor3|ponAbe2|rheMac8	B0
chr1	145091996	145092297	-	AluSx1	hg19|panTro5|gorGor3|ponAbe2|rheMac8	B0
chr1	145230048	145230360	+	AluJo	hg19|panTro5|gorGor3|ponAbe2|rheMac8	B0
chr1	145249151	145249458	+	AluSg	hg19|panTro5|gorGor3|ponAbe2|rheMac8	B0
chr1	145289362	145289667	+	AluJr	hg19|panTro5|gorGor3|ponAbe2|rheMac8	B0
chr1	145294127	145294423	+	AluSg	hg19|panTro5|gorGor3|ponAbe2|rheMac8	B0
chr1	145398719	145399016	+	AluSq	hg19|panTro5|gorGor3|ponAbe2|rheMac8	B0
chr1	145511863	145512171	+	AluY	hg19|panTro5|gorGor3|ponAbe2|rheMac8	B0
chr1	145530441	145530690	+	AluJr	hg19|panTro5|gorGor3|ponAbe2|rheMac8	B0
chr1	145602072	145602370	-	AluSx1	hg19|panTro5|gorGor3|ponAbe2|rheMac8	B0
chr1	145652874	145653184	+	AluSq	hg19|panTro5|gorGor3|ponAbe2|rheMac8	B0
chr1	145659386	145659678	+	AluJr	hg19|panTro5|gorGor3|ponAbe2|rheMac8	B0
chr1	145660424	145660735	+	AluSz	hg19|panTro5|gorGor3|ponAbe2|rheMac8	B0
chr1	145759029	145759324	-	AluSz	hg19|panTro5|gorGor3|ponAbe2|rheMac8	B0
chr1	14581335	14581644	+	AluSg	hg19|panTro5|gorGor3|ponAbe2|rheMac8	B0
chr11	45880842	45881128	+	AluJo	hg19|panTro5|gorGor3|ponAbe2|rheMac8	B0
chr11	45964672	45965031	-	AluJb	hg19|panTro5|gorGor3|ponAbe2|rheMac8	B0
chr11	45966317	45966613	-	AluSx	hg19|panTro5|gorGor3|ponAbe2|rheMac8	B0
chr11	46028855	46029165	-	AluSq2	hg19|panTro5|gorGor3|ponAbe2|rheMac8	B0
chr11	46059663	46059978	-	AluSz	hg19|panTro5|gorGor3|ponAbe2|rheMac8	B0
chr1	14625715	14625987	+	AluSx	hg19|panTro5|gorGor3|ponAbe2|rheMac8	B0
chr11	46308067	46308365	+	AluSx1	hg19|panTro5|gorGor3|ponAbe2|rheMac8	B0
chr11	46309246	46309538	+	AluSg	hg19|panTro5|gorGor3|ponAbe2|rheMac8	B0
chr11	46310646	46310948	+	AluSz	hg19|panTro5|gorGor3|ponAbe2|rheMac8	B0
chr11	46344981	46345282	+	AluSx1	hg19|panTro5|gorGor3|ponAbe2|rheMac8	B0
chr1	146471769	146472050	-	AluJo	hg19|panTro5|gorGor3|ponAbe2|rheMac8	B0
chr11	46486314	46486621	+	AluSc	hg19|panTro5|gorGor3|ponAbe2|rheMac8	B0
chr11	46506201	46506492	-	AluY	hg19|panTro5|gorGor3|ponAbe2|rheMac8	B0
chr11	46552444	46552732	-	AluSx1	hg19|panTro5|gorGor3|ponAbe2|rheMac8	B0
chr11	46556231	46556523	-	AluJb	hg19|panTro5|gorGor3|ponAbe2|rheMac8	B0
chr11	46571386	46571668	-	AluSx1	hg19|panTro5|gorGor3|ponAbe2|rheMac8	B0
chr11	46602354	46602643	-	AluJb	hg19|panTro5|gorGor3|ponAbe2|rheMac8	B0
chr11	46776756	46777056	-	AluSq4	hg19|panTro5|gorGor3|ponAbe2|rheMac8	B0
chr11	46891992	46892272	-	AluJo	hg19|panTro5|gorGor3|ponAbe2|rheMac8	B0
chr1	14693445	14693738	+	AluSg	hg19|panTro5|gorGor3|ponAbe2|rheMac8	B0
chr11	46977260	46977535	+	AluSx1	hg19|panTro5|gorGor3|ponAbe2|rheMac8	B0
chr11	47033544	47033824	+	AluJr	hg19|panTro5|gorGor3|ponAbe2|rheMac8	B0
chr11	47081374	47081683	+	AluSz	hg19|panTro5|gorGor3|ponAbe2|rheMac8	B0
chr11	47094962	47095075	+	AluSz	hg19|panTro5|gorGor3|ponAbe2|rheMac8	B0
chr1	147100823	147101122	+	AluY	hg19|panTro5|gorGor3|ponAbe2|rheMac8	B0
chr11	47160943	47161237	+	AluSx1	hg19|panTro5|gorGor3|ponAbe2|rheMac8	B0
chr11	47180778	47181081	+	AluSx	hg19|panTro5|gorGor3|ponAbe2|rheMac8	B0
chr11	47236061	47236338	+	AluJo	hg19|panTro5|gorGor3|ponAbe2|rheMac8	B0
chr11	47253612	47253905	+	AluSx1	hg19|panTro5|gorGor3|ponAbe2|rheMac8	B0
chr11	47283648	47283907	+	AluSc8	hg19|panTro5|gorGor3|ponAbe2|rheMac8	B0
chr11	47365302	47365622	-	AluSx	hg19|panTro5|gorGor3|ponAbe2|rheMac8	B0
chr11	47366352	47366640	-	AluSx1	hg19|panTro5|gorGor3|ponAbe2|rheMac8	B0
chr11	47392629	47392935	+	AluSc8	hg19|panTro5|gorGor3|ponAbe2|rheMac8	B0
chr11	47393653	47393936	-	AluSc	hg19|panTro5|gorGor3|ponAbe2|rheMac8	B0
chr11	47448535	47448822	+	AluY	hg19|panTro5|gorGor3|ponAbe2|rheMac8	B0
chr11	47636015	47636141	-	AluSq2	hg19|panTro5|gorGor3|ponAbe2|rheMac8	B0
chr11	47638220	47638535	-	AluSp	hg19|panTro5|gorGor3|ponAbe2|rheMac8	B0
chr11	47647566	47647879	-	AluSp	hg19|panTro5|gorGor3|ponAbe2|rheMac8	B0
chr11	47655636	47655931	-	AluJo	hg19|panTro5|gorGor3|ponAbe2|rheMac8	B0
chr11	47747810	47748021	-	AluJr4	hg19|panTro5|gorGor3|ponAbe2|rheMac8	B0
chr11	47748795	47749088	-	AluSz	hg19|panTro5|gorGor3|ponAbe2|rheMac8	B0
chr11	47750087	47750375	-	AluJb	hg19|panTro5|gorGor3|ponAbe2|rheMac8	B0
chr11	47750400	47750703	-	AluSx1	hg19|panTro5|gorGor3|ponAbe2|rheMac8	B0
chr11	47789304	47789598	+	AluSg4	hg19|panTro5|gorGor3|ponAbe2|rheMac8	B0
chr11	47953627	47953937	+	AluSg	hg19|panTro5|gorGor3|ponAbe2|rheMac8	B0
chr11	48008485	48008784	+	AluJb	hg19|panTro5|gorGor3|ponAbe2|rheMac8	B0
chr11	48049062	48049372	+	AluSx3	hg19|panTro5|gorGor3|ponAbe2|rheMac8	B0
chr11	48124737	48125039	+	AluJr	hg19|panTro5|gorGor3|ponAbe2|rheMac8	B0
chr1	148940475	148940628	+	AluJb	hg19|panTro5|gorGor3|ponAbe2|rheMac8	B0
chr1	148942641	148942921	+	AluSz	hg19|panTro5|gorGor3|ponAbe2|rheMac8	B0
chr1	148944440	148944714	+	AluSz	hg19|panTro5|gorGor3|ponAbe2|rheMac8	B0
chr11	49181462	49181634	-	AluSg4	hg19|panTro5|gorGor3|ponAbe2|rheMac8	B0
chr1	149275808	149275931	+	AluJo	hg19|panTro5|gorGor3|ponAbe2|rheMac8	B0
chr1	149293675	149293974	-	AluSz	hg19|panTro5|gorGor3|ponAbe2|rheMac8	B0
chr1	14937946	14938201	+	AluJo	hg19|panTro5|gorGor3|ponAbe2|rheMac8	B0
chr1	1496464	1496761	-	AluSg	hg19|panTro5|gorGor3|ponAbe2|rheMac8	B0
chr1	149684235	149684292	+	AluYc	hg19|panTro5|gorGor3|ponAbe2|rheMac8	B0
chr1	149911547	149911857	+	AluSx1	hg19|panTro5|gorGor3|ponAbe2|rheMac8	B0
chr1	150079729	150080024	+	AluSx	hg19|panTro5|gorGor3|ponAbe2|rheMac8	B0
chr1	150100144	150100450	+	AluJb	hg19|panTro5|gorGor3|ponAbe2|rheMac8	B0
chr1	150103708	150104026	+	AluJr4	hg19|panTro5|gorGor3|ponAbe2|rheMac8	B0
chr1	150268076	150268204	+	AluJr	hg19|panTro5|gorGor3|ponAbe2|rheMac8	B0
chr1	150280983	150281282	+	AluSz	hg19|panTro5|gorGor3|ponAbe2|rheMac8	B0
chr1	15030121	15030405	+	AluJr	hg19|panTro5|gorGor3|ponAbe2|rheMac8	B0
chr1	15040154	15040479	+	AluJo	hg19|panTro5|gorGor3|ponAbe2|rheMac8	B0
chr1	150518819	150519128	-	AluSx1	hg19|panTro5|gorGor3|ponAbe2|rheMac8	B0
chr1	150527466	150527763	-	AluSg	hg19|panTro5|gorGor3|ponAbe2|rheMac8	B0
chr1	150536916	150537225	-	AluJo	hg19|panTro5|gorGor3|ponAbe2|rheMac8	B0
chr1	150542713	150543009	-	AluJb	hg19|panTro5|gorGor3|ponAbe2|rheMac8	B0
chr1	150543240	150543553	-	AluSx4	hg19|panTro5|gorGor3|ponAbe2|rheMac8	B0
chr1	150553590	150553702	-	AluSx	hg19|panTro5|gorGor3|ponAbe2|rheMac8	B0
chr1	150571785	150572100	-	AluSc	hg19|panTro5|gorGor3|ponAbe2|rheMac8	B0
chr1	150577558	150577840	-	AluSq	hg19|panTro5|gorGor3|ponAbe2|rheMac8	B0
chr1	150581539	150581833	-	AluSc5	hg19|panTro5|gorGor3|ponAbe2|rheMac8	B0
chr1	150582786	150583078	-	AluSx1	hg19|panTro5|gorGor3|ponAbe2|rheMac8	B0
chr1	150583451	150583755	-	AluSz	hg19|panTro5|gorGor3|ponAbe2|rheMac8	B0
chr1	150584303	150584599	-	AluJo	hg19|panTro5|gorGor3|ponAbe2|rheMac8	B0
chr1	150586461	150586750	-	AluJr	hg19|panTro5|gorGor3|ponAbe2|rheMac8	B0
chr1	150586839	150587120	-	AluJo	hg19|panTro5|gorGor3|ponAbe2|rheMac8	B0
chr1	150587892	150588184	-	AluJo	hg19|panTro5|gorGor3|ponAbe2|rheMac8	B0
chr1	150588787	150589080	-	AluSq2	hg19|panTro5|gorGor3|ponAbe2|rheMac8	B0
chr1	150589795	150590092	-	AluSq	hg19|panTro5|gorGor3|ponAbe2|rheMac8	B0
chr1	150593739	150594048	-	AluSz	hg19|panTro5|gorGor3|ponAbe2|rheMac8	B0
chr1	150817289	150817585	-	AluSx1	hg19|panTro5|gorGor3|ponAbe2|rheMac8	B0
chr1	150826564	150826722	-	AluJo	hg19|panTro5|gorGor3|ponAbe2|rheMac8	B0
chr1	150849456	150849752	+	AluSq	hg19|panTro5|gorGor3|ponAbe2|rheMac8	B0
chr11	508761	509062	+	AluSq	hg19|panTro5|gorGor3|ponAbe2|rheMac8	B0
chr1	150966097	150966409	-	AluSq	hg19|panTro5|gorGor3|ponAbe2|rheMac8	B0
chr1	151091505	151091799	+	AluJr	hg19|panTro5|gorGor3|ponAbe2|rheMac8	B0
chr1	151095649	151095958	+	AluSz6	hg19|panTro5|gorGor3|ponAbe2|rheMac8	B0
chr1	151171806	151172107	+	AluSz	hg19|panTro5|gorGor3|ponAbe2|rheMac8	B0
chr1	151340109	151340288	-	AluJb	hg19|panTro5|gorGor3|ponAbe2|rheMac8	B0
chr11	513728	513845	+	AluSq2	hg19|panTro5|gorGor3|ponAbe2|rheMac8	B0
chr1	151381861	151382112	-	AluJb	hg19|panTro5|gorGor3|ponAbe2|rheMac8	B0
chr1	151407369	151407676	-	AluSx1	hg19|panTro5|gorGor3|ponAbe2|rheMac8	B0
chr1	151425406	151425695	-	AluSg	hg19|panTro5|gorGor3|ponAbe2|rheMac8	B0
chr1	151532611	151532906	+	AluSg	hg19|panTro5|gorGor3|ponAbe2|rheMac8	B0
chr1	151545951	151546249	+	AluSp	hg19|panTro5|gorGor3|ponAbe2|rheMac8	B0
chr1	151552854	151553162	+	AluJr	hg19|panTro5|gorGor3|ponAbe2|rheMac8	B0
chr1	151597700	151598008	+	AluSz	hg19|panTro5|gorGor3|ponAbe2|rheMac8	B0
chr1	152321619	152321920	-	AluSg4	hg19|panTro5|gorGor3|ponAbe2|rheMac8	B0
chr11	5299772	5300052	-	AluSx1	hg19|panTro5|gorGor3|ponAbe2|rheMac8	B0
chr1	15305649	15305930	+	AluSg	hg19|panTro5|gorGor3|ponAbe2|rheMac8	B0
chr1	153578027	153578255	-	AluSp	hg19|panTro5|gorGor3|ponAbe2|rheMac8	B0
chr1	153641978	153642217	-	AluSx	hg19|panTro5|gorGor3|ponAbe2|rheMac8	B0
chr1	153796194	153796504	-	AluSx1	hg19|panTro5|gorGor3|ponAbe2|rheMac8	B0
chr1	153810981	153811134	-	AluJb	hg19|panTro5|gorGor3|ponAbe2|rheMac8	B0
chr1	153850638	153850900	-	AluJo	hg19|panTro5|gorGor3|ponAbe2|rheMac8	B0
chr1	153889873	153890170	-	AluSx1	hg19|panTro5|gorGor3|ponAbe2|rheMac8	B0
chr1	154135392	154135584	-	AluSc	hg19|panTro5|gorGor3|ponAbe2|rheMac8	B0
chr1	154361120	154361416	+	AluSg7	hg19|panTro5|gorGor3|ponAbe2|rheMac8	B0
chr1	154382729	154383025	-	AluJb	hg19|panTro5|gorGor3|ponAbe2|rheMac8	B0
chr1	154406527	154406807	+	AluSx	hg19|panTro5|gorGor3|ponAbe2|rheMac8	B0
chr1	154423711	154424023	+	AluSx1	hg19|panTro5|gorGor3|ponAbe2|rheMac8	B0
chr1	154439055	154439353	+	AluJb	hg19|panTro5|gorGor3|ponAbe2|rheMac8	B0
chr1	154440094	154440212	+	AluJo	hg19|panTro5|gorGor3|ponAbe2|rheMac8	B0
chr1	154507930	154508165	+	AluJr	hg19|panTro5|gorGor3|ponAbe2|rheMac8	B0
chr1	154677252	154677545	-	AluSx1	hg19|panTro5|gorGor3|ponAbe2|rheMac8	B0
chr1	154732479	154732655	-	AluSq2	hg19|panTro5|gorGor3|ponAbe2|rheMac8	B0
chr1	15491665	15491819	+	AluJb	hg19|panTro5|gorGor3|ponAbe2|rheMac8	B0
chr1	15492934	15493235	+	AluSx1	hg19|panTro5|gorGor3|ponAbe2|rheMac8	B0
chr1	15498592	15498904	+	AluJb	hg19|panTro5|gorGor3|ponAbe2|rheMac8	B0
chr1	155027188	155027378	+	AluSx4	hg19|panTro5|gorGor3|ponAbe2|rheMac8	B0
chr1	155078520	155078745	+	AluJr4	hg19|panTro5|gorGor3|ponAbe2|rheMac8	B0
chr1	155111018	155111263	+	AluSx	hg19|panTro5|gorGor3|ponAbe2|rheMac8	B0
chr1	155277846	155278157	-	AluSx3	hg19|panTro5|gorGor3|ponAbe2|rheMac8	B0
chr1	155342399	155342566	-	AluJo	hg19|panTro5|gorGor3|ponAbe2|rheMac8	B0
chr1	155384104	155384395	-	AluSp	hg19|panTro5|gorGor3|ponAbe2|rheMac8	B0
chr1	155519818	155520108	-	AluSg	hg19|panTro5|gorGor3|ponAbe2|rheMac8	B0
chr1	155526247	155526531	-	AluSc8	hg19|panTro5|gorGor3|ponAbe2|rheMac8	B0
chr1	155528631	155528928	-	AluSx	hg19|panTro5|gorGor3|ponAbe2|rheMac8	B0
chr1	155638654	155638806	-	AluJb	hg19|panTro5|gorGor3|ponAbe2|rheMac8	B0
chr1	155650374	155650656	-	AluJb	hg19|panTro5|gorGor3|ponAbe2|rheMac8	B0
chr1	155654353	155654676	-	AluSx3	hg19|panTro5|gorGor3|ponAbe2|rheMac8	B0
chr1	155700118	155700434	+	AluJb	hg19|panTro5|gorGor3|ponAbe2|rheMac8	B0
chr1	155723665	155723768	-	AluSz6	hg19|panTro5|gorGor3|ponAbe2|rheMac8	B0
chr1	155827238	155827530	+	AluSx	hg19|panTro5|gorGor3|ponAbe2|rheMac8	B0
chr1	155853042	155853327	+	AluJb	hg19|panTro5|gorGor3|ponAbe2|rheMac8	B0
chr1	155884902	155885211	-	AluSx	hg19|panTro5|gorGor3|ponAbe2|rheMac8	B0
chr1	155896116	155896407	-	AluSx1	hg19|panTro5|gorGor3|ponAbe2|rheMac8	B0
chr1	155924917	155925208	-	AluSx	hg19|panTro5|gorGor3|ponAbe2|rheMac8	B0
chr1	155963052	155963351	-	AluSp	hg19|panTro5|gorGor3|ponAbe2|rheMac8	B0
chr1	155964912	155965079	-	AluJb	hg19|panTro5|gorGor3|ponAbe2|rheMac8	B0
chr1	156053311	156053604	+	AluSx1	hg19|panTro5|gorGor3|ponAbe2|rheMac8	B0
chr1	156090248	156090526	+	AluJr	hg19|panTro5|gorGor3|ponAbe2|rheMac8	B0
chr1	156091664	156091905	+	AluSz	hg19|panTro5|gorGor3|ponAbe2|rheMac8	B0
chr1	156095497	156095761	+	AluSx	hg19|panTro5|gorGor3|ponAbe2|rheMac8	B0
chr1	156101678	156101977	+	AluSp	hg19|panTro5|gorGor3|ponAbe2|rheMac8	B0
chr1	156103081	156103391	+	AluY	hg19|panTro5|gorGor3|ponAbe2|rheMac8	B0
chr1	156145787	156146104	+	AluJb	hg19|panTro5|gorGor3|ponAbe2|rheMac8	B0
chr1	156163262	156163552	-	AluSx	hg19|panTro5|gorGor3|ponAbe2|rheMac8	B0
chr1	156183692	156184004	-	AluSx3	hg19|panTro5|gorGor3|ponAbe2|rheMac8	B0
chr1	156442333	156442507	-	AluSx	hg19|panTro5|gorGor3|ponAbe2|rheMac8	B0
chr11	566635	566937	-	AluSx1	hg19|panTro5|gorGor3|ponAbe2|rheMac8	B0
chr1	156943849	156944159	-	AluJo	hg19|panTro5|gorGor3|ponAbe2|rheMac8	B0
chr1	156984187	156984307	-	AluJo	hg19|panTro5|gorGor3|ponAbe2|rheMac8	B0
chr1	15704051	15704349	+	AluJb	hg19|panTro5|gorGor3|ponAbe2|rheMac8	B0
chr11	57065724	57066019	-	AluSz6	hg19|panTro5|gorGor3|ponAbe2|rheMac8	B0
chr11	57533360	57533593	+	AluJb	hg19|panTro5|gorGor3|ponAbe2|rheMac8	B0
chr11	57537844	57538153	+	AluSc	hg19|panTro5|gorGor3|ponAbe2|rheMac8	B0
chr11	57541126	57541419	+	AluSx1	hg19|panTro5|gorGor3|ponAbe2|rheMac8	B0
chr11	57551734	57551899	+	AluJb	hg19|panTro5|gorGor3|ponAbe2|rheMac8	B0
chr11	57561975	57562272	+	AluSp	hg19|panTro5|gorGor3|ponAbe2|rheMac8	B0
chr1	15761048	15761357	-	AluSx1	hg19|panTro5|gorGor3|ponAbe2|rheMac8	B0
chr1	15765640	15765949	+	AluSq	hg19|panTro5|gorGor3|ponAbe2|rheMac8	B0
chr1	15767393	15767698	+	AluSx1	hg19|panTro5|gorGor3|ponAbe2|rheMac8	B0
chr1	15770473	15770783	+	AluJr	hg19|panTro5|gorGor3|ponAbe2|rheMac8	B0
chr1	157774637	157774948	-	AluJb	hg19|panTro5|gorGor3|ponAbe2|rheMac8	B0
chr1	15782571	15782886	+	AluSz	hg19|panTro5|gorGor3|ponAbe2|rheMac8	B0
chr1	157985813	157986119	+	AluSg	hg19|panTro5|gorGor3|ponAbe2|rheMac8	B0
chr1	15809270	15809561	-	AluY	hg19|panTro5|gorGor3|ponAbe2|rheMac8	B0
chr1	15814599	15814890	+	AluJr	hg19|panTro5|gorGor3|ponAbe2|rheMac8	B0
chr11	583611	583744	+	AluJr	hg19|panTro5|gorGor3|ponAbe2|rheMac8	B0
chr1	158591651	158591953	-	AluY	hg19|panTro5|gorGor3|ponAbe2|rheMac8	B0
chr1	15899314	15899401	-	AluSx	hg19|panTro5|gorGor3|ponAbe2|rheMac8	B0
chr11	59328903	59329215	+	AluSx	hg19|panTro5|gorGor3|ponAbe2|rheMac8	B0
chr11	59332780	59333074	+	AluSx	hg19|panTro5|gorGor3|ponAbe2|rheMac8	B0
chr11	59346796	59347057	-	AluSp	hg19|panTro5|gorGor3|ponAbe2|rheMac8	B0
chr11	59348158	59348291	-	AluJr4	hg19|panTro5|gorGor3|ponAbe2|rheMac8	B0
chr11	59359089	59359393	-	AluSq2	hg19|panTro5|gorGor3|ponAbe2|rheMac8	B0
chr11	595083	595294	+	AluSx	hg19|panTro5|gorGor3|ponAbe2|rheMac8	B0
chr11	59601868	59602162	-	AluSz	hg19|panTro5|gorGor3|ponAbe2|rheMac8	B0
chr11	59602610	59602896	-	AluSp	hg19|panTro5|gorGor3|ponAbe2|rheMac8	B0
chr11	59611605	59611910	-	AluSq2	hg19|panTro5|gorGor3|ponAbe2|rheMac8	B0
chr11	59612318	59612635	-	AluJo	hg19|panTro5|gorGor3|ponAbe2|rheMac8	B0
chr1	15980869	15981168	+	AluJb	hg19|panTro5|gorGor3|ponAbe2|rheMac8	B0
chr1	15990732	15990946	+	AluSc8	hg19|panTro5|gorGor3|ponAbe2|rheMac8	B0
chr1	15993423	15993713	+	AluSx4	hg19|panTro5|gorGor3|ponAbe2|rheMac8	B0
chr1	159946585	159946633	+	AluJr4	hg19|panTro5|gorGor3|ponAbe2|rheMac8	B0
chr1	160112315	160112608	+	AluSx3	hg19|panTro5|gorGor3|ponAbe2|rheMac8	B0
chr11	60159109	60159406	+	AluSx	hg19|panTro5|gorGor3|ponAbe2|rheMac8	B0
chr11	60161991	60162305	+	AluSq	hg19|panTro5|gorGor3|ponAbe2|rheMac8	B0
chr1	160221269	160221558	-	AluJb	hg19|panTro5|gorGor3|ponAbe2|rheMac8	B0
chr1	160225089	160225223	-	AluJo	hg19|panTro5|gorGor3|ponAbe2|rheMac8	B0
chr1	160227508	160227820	-	AluJb	hg19|panTro5|gorGor3|ponAbe2|rheMac8	B0
chr1	160258754	160258939	-	AluSg7	hg19|panTro5|gorGor3|ponAbe2|rheMac8	B0
chr1	160259378	160259680	-	AluSz6	hg19|panTro5|gorGor3|ponAbe2|rheMac8	B0
chr11	60532101	60532402	+	AluSg	hg19|panTro5|gorGor3|ponAbe2|rheMac8	B0
chr11	60795854	60795969	-	AluJb	hg19|panTro5|gorGor3|ponAbe2|rheMac8	B0
chr11	60946345	60946659	-	AluSp	hg19|panTro5|gorGor3|ponAbe2|rheMac8	B0
chr1	160963694	160963867	-	AluSx	hg19|panTro5|gorGor3|ponAbe2|rheMac8	B0
chr1	160967794	160967962	-	AluSp	hg19|panTro5|gorGor3|ponAbe2|rheMac8	B0
chr1	16099893	16100195	+	AluSp	hg19|panTro5|gorGor3|ponAbe2|rheMac8	B0
chr1	16103077	16103397	+	AluSg	hg19|panTro5|gorGor3|ponAbe2|rheMac8	B0
chr1	161035341	161035656	-	AluSp	hg19|panTro5|gorGor3|ponAbe2|rheMac8	B0
chr1	16105786	16106097	-	AluSz	hg19|panTro5|gorGor3|ponAbe2|rheMac8	B0
chr1	16107581	16107859	+	AluSc	hg19|panTro5|gorGor3|ponAbe2|rheMac8	B0
chr1	161124279	161124578	-	AluSc	hg19|panTro5|gorGor3|ponAbe2|rheMac8	B0
chr11	61130427	61130707	+	AluSc8	hg19|panTro5|gorGor3|ponAbe2|rheMac8	B0
chr1	161164180	161164478	-	AluJo	hg19|panTro5|gorGor3|ponAbe2|rheMac8	B0
chr1	161185972	161186115	+	AluSx	hg19|panTro5|gorGor3|ponAbe2|rheMac8	B0
chr1	161322521	161322793	+	AluSx	hg19|panTro5|gorGor3|ponAbe2|rheMac8	B0
chr1	161400329	161400609	+	AluSx	hg19|panTro5|gorGor3|ponAbe2|rheMac8	B0
chr11	61567659	61567831	-	AluJb	hg19|panTro5|gorGor3|ponAbe2|rheMac8	B0
chr11	61569354	61569516	-	AluSx	hg19|panTro5|gorGor3|ponAbe2|rheMac8	B0
chr1	161695148	161695462	+	AluSx	hg19|panTro5|gorGor3|ponAbe2|rheMac8	B0
chr11	61938440	61938749	-	AluSx	hg19|panTro5|gorGor3|ponAbe2|rheMac8	B0
chr11	62159946	62160070	+	AluJb	hg19|panTro5|gorGor3|ponAbe2|rheMac8	B0
chr11	62188998	62189281	-	AluSx	hg19|panTro5|gorGor3|ponAbe2|rheMac8	B0
chr11	62218553	62218662	-	AluSg7	hg19|panTro5|gorGor3|ponAbe2|rheMac8	B0
chr11	62248562	62248878	-	AluSq	hg19|panTro5|gorGor3|ponAbe2|rheMac8	B0
chr11	62387022	62387313	-	AluSx	hg19|panTro5|gorGor3|ponAbe2|rheMac8	B0
chr11	62409909	62410200	-	AluSx3	hg19|panTro5|gorGor3|ponAbe2|rheMac8	B0
chr1	162410323	162410611	-	AluJb	hg19|panTro5|gorGor3|ponAbe2|rheMac8	B0
chr11	62411413	62411714	-	AluSp	hg19|panTro5|gorGor3|ponAbe2|rheMac8	B0
chr11	62486300	62486596	-	AluSg7	hg19|panTro5|gorGor3|ponAbe2|rheMac8	B0
chr11	62516038	62516338	-	AluSx3	hg19|panTro5|gorGor3|ponAbe2|rheMac8	B0
chr1	162561905	162562194	+	AluSx	hg19|panTro5|gorGor3|ponAbe2|rheMac8	B0
chr1	162563256	162563565	+	AluSx	hg19|panTro5|gorGor3|ponAbe2|rheMac8	B0
chr11	62581939	62582100	-	AluSx	hg19|panTro5|gorGor3|ponAbe2|rheMac8	B0
chr11	62590648	62590936	-	AluJb	hg19|panTro5|gorGor3|ponAbe2|rheMac8	B0
chr11	62653479	62653790	+	AluSz	hg19|panTro5|gorGor3|ponAbe2|rheMac8	B0
chr1	162768503	162768812	+	AluSp	hg19|panTro5|gorGor3|ponAbe2|rheMac8	B0
chr11	63177430	63177739	+	AluSc	hg19|panTro5|gorGor3|ponAbe2|rheMac8	B0
chr11	63439586	63439885	+	AluSp	hg19|panTro5|gorGor3|ponAbe2|rheMac8	B0
chr11	63480285	63480584	+	AluSp	hg19|panTro5|gorGor3|ponAbe2|rheMac8	B0
chr11	63501927	63502206	+	AluSz	hg19|panTro5|gorGor3|ponAbe2|rheMac8	B0
chr11	63611669	63611967	+	AluJr	hg19|panTro5|gorGor3|ponAbe2|rheMac8	B0
chr11	64103013	64103308	+	AluSx1	hg19|panTro5|gorGor3|ponAbe2|rheMac8	B0
chr11	64496805	64497108	-	AluSx	hg19|panTro5|gorGor3|ponAbe2|rheMac8	B0
chr11	64505902	64506210	-	AluSz	hg19|panTro5|gorGor3|ponAbe2|rheMac8	B0
chr1	164559163	164559461	+	AluJb	hg19|panTro5|gorGor3|ponAbe2|rheMac8	B0
chr1	16457126	16457423	-	AluJb	hg19|panTro5|gorGor3|ponAbe2|rheMac8	B0
chr1	164575690	164575820	+	AluSx	hg19|panTro5|gorGor3|ponAbe2|rheMac8	B0
chr1	16462368	16462663	-	AluJo	hg19|panTro5|gorGor3|ponAbe2|rheMac8	B0
chr11	64672343	64672621	-	AluSx	hg19|panTro5|gorGor3|ponAbe2|rheMac8	B0
chr1	164697279	164697568	+	AluJr	hg19|panTro5|gorGor3|ponAbe2|rheMac8	B0
chr1	164738024	164738319	+	AluSz6	hg19|panTro5|gorGor3|ponAbe2|rheMac8	B0
chr1	16474367	16474670	-	AluSz6	hg19|panTro5|gorGor3|ponAbe2|rheMac8	B0
chr1	164746390	164746676	+	AluSz6	hg19|panTro5|gorGor3|ponAbe2|rheMac8	B0
chr11	64816510	64816791	-	AluJb	hg19|panTro5|gorGor3|ponAbe2|rheMac8	B0
chr11	64823357	64823656	-	AluSq10	hg19|panTro5|gorGor3|ponAbe2|rheMac8	B0
chr11	64873942	64874240	+	AluY	hg19|panTro5|gorGor3|ponAbe2|rheMac8	B0
chr11	65074116	65074396	+	AluJb	hg19|panTro5|gorGor3|ponAbe2|rheMac8	B0
chr11	65090400	65090704	+	AluSc5	hg19|panTro5|gorGor3|ponAbe2|rheMac8	B0
chr11	65100746	65101073	-	AluY	hg19|panTro5|gorGor3|ponAbe2|rheMac8	B0
chr11	65115770	65116056	+	AluJo	hg19|panTro5|gorGor3|ponAbe2|rheMac8	B0
chr11	65206871	65207155	+	AluSz6	hg19|panTro5|gorGor3|ponAbe2|rheMac8	B0
chr11	65207449	65207569	+	AluJr	hg19|panTro5|gorGor3|ponAbe2|rheMac8	B0
chr11	65207794	65207955	+	AluJr	hg19|panTro5|gorGor3|ponAbe2|rheMac8	B0
chr11	65208071	65208335	+	AluSx3	hg19|panTro5|gorGor3|ponAbe2|rheMac8	B0
chr11	65210074	65210365	+	AluSx4	hg19|panTro5|gorGor3|ponAbe2|rheMac8	B0
chr11	65214838	65215125	+	AluSz	hg19|panTro5|gorGor3|ponAbe2|rheMac8	B0
chr11	65244285	65244382	+	AluJr4	hg19|panTro5|gorGor3|ponAbe2|rheMac8	B0
chr11	65245217	65245277	+	AluSz6	hg19|panTro5|gorGor3|ponAbe2|rheMac8	B0
chr11	65261667	65261964	-	AluSc	hg19|panTro5|gorGor3|ponAbe2|rheMac8	B0
chr11	65263405	65263705	+	AluSc8	hg19|panTro5|gorGor3|ponAbe2|rheMac8	B0
chr11	65274253	65274547	-	AluSx	hg19|panTro5|gorGor3|ponAbe2|rheMac8	B0
chr11	65275385	65275691	+	AluSp	hg19|panTro5|gorGor3|ponAbe2|rheMac8	B0
chr11	65316886	65317188	-	AluSc	hg19|panTro5|gorGor3|ponAbe2|rheMac8	B0
chr11	65347164	65347312	+	AluSz6	hg19|panTro5|gorGor3|ponAbe2|rheMac8	B0
chr11	65358224	65358525	+	AluSx	hg19|panTro5|gorGor3|ponAbe2|rheMac8	B0
chr11	65382140	65382445	-	AluSg	hg19|panTro5|gorGor3|ponAbe2|rheMac8	B0
chr11	65538231	65538535	-	AluJb	hg19|panTro5|gorGor3|ponAbe2|rheMac8	B0
chr11	65541883	65542179	-	AluSx	hg19|panTro5|gorGor3|ponAbe2|rheMac8	B0
chr11	65543359	65543661	-	AluSx1	hg19|panTro5|gorGor3|ponAbe2|rheMac8	B0
chr11	65591695	65591981	-	AluJb	hg19|panTro5|gorGor3|ponAbe2|rheMac8	B0
chr1	165817587	165817878	+	AluSz	hg19|panTro5|gorGor3|ponAbe2|rheMac8	B0
chr11	65848418	65848732	+	AluJo	hg19|panTro5|gorGor3|ponAbe2|rheMac8	B0
chr11	65875911	65876259	+	AluJo	hg19|panTro5|gorGor3|ponAbe2|rheMac8	B0
chr11	65919421	65919710	+	AluJr	hg19|panTro5|gorGor3|ponAbe2|rheMac8	B0
chr11	65930537	65930843	+	AluSz	hg19|panTro5|gorGor3|ponAbe2|rheMac8	B0
chr1	16597802	16598075	-	AluSx1	hg19|panTro5|gorGor3|ponAbe2|rheMac8	B0
chr1	16612352	16612663	-	AluJo	hg19|panTro5|gorGor3|ponAbe2|rheMac8	B0
chr1	16618808	16619091	-	AluJr	hg19|panTro5|gorGor3|ponAbe2|rheMac8	B0
chr11	66255750	66256057	+	AluSx	hg19|panTro5|gorGor3|ponAbe2|rheMac8	B0
chr11	6627123	6627424	+	AluSg	hg19|panTro5|gorGor3|ponAbe2|rheMac8	B0
chr11	66348068	66348327	-	AluSc8	hg19|panTro5|gorGor3|ponAbe2|rheMac8	B0
chr1	16640470	16640744	-	AluSx1	hg19|panTro5|gorGor3|ponAbe2|rheMac8	B0
chr11	66416004	66416293	+	AluSq10	hg19|panTro5|gorGor3|ponAbe2|rheMac8	B0
chr11	66416819	66417004	+	AluJr	hg19|panTro5|gorGor3|ponAbe2|rheMac8	B0
chr11	66418052	66418359	+	AluY	hg19|panTro5|gorGor3|ponAbe2|rheMac8	B0
chr11	66420197	66420320	+	AluJb	hg19|panTro5|gorGor3|ponAbe2|rheMac8	B0
chr11	66438170	66438294	+	AluSx4	hg19|panTro5|gorGor3|ponAbe2|rheMac8	B0
chr11	66456738	66457074	-	AluSq2	hg19|panTro5|gorGor3|ponAbe2|rheMac8	B0
chr11	66458291	66458587	-	AluSp	hg19|panTro5|gorGor3|ponAbe2|rheMac8	B0
chr11	66459580	66459845	-	AluJr	hg19|panTro5|gorGor3|ponAbe2|rheMac8	B0
chr1	16646994	16647203	-	AluJr	hg19|panTro5|gorGor3|ponAbe2|rheMac8	B0
chr1	16647221	16647313	-	AluSz	hg19|panTro5|gorGor3|ponAbe2|rheMac8	B0
chr11	66532167	66532450	+	AluJb	hg19|panTro5|gorGor3|ponAbe2|rheMac8	B0
chr11	66567268	66567560	+	AluJb	hg19|panTro5|gorGor3|ponAbe2|rheMac8	B0
chr11	66573956	66574247	+	AluSz6	hg19|panTro5|gorGor3|ponAbe2|rheMac8	B0
chr11	66579266	66579413	+	AluJo	hg19|panTro5|gorGor3|ponAbe2|rheMac8	B0
chr1	16665293	16665603	-	AluSz	hg19|panTro5|gorGor3|ponAbe2|rheMac8	B0
chr11	66734462	66734599	-	AluJr4	hg19|panTro5|gorGor3|ponAbe2|rheMac8	B0
chr1	166880166	166880298	-	AluJr4	hg19|panTro5|gorGor3|ponAbe2|rheMac8	B0
chr11	66892960	66893265	+	AluSx	hg19|panTro5|gorGor3|ponAbe2|rheMac8	B0
chr11	66896408	66896569	+	AluJo	hg19|panTro5|gorGor3|ponAbe2|rheMac8	B0
chr11	66915608	66915910	+	AluJb	hg19|panTro5|gorGor3|ponAbe2|rheMac8	B0
chr11	66951297	66951586	+	AluJo	hg19|panTro5|gorGor3|ponAbe2|rheMac8	B0
chr1	16703806	16704084	+	AluSx	hg19|panTro5|gorGor3|ponAbe2|rheMac8	B0
chr11	67058546	67058848	+	AluJb	hg19|panTro5|gorGor3|ponAbe2|rheMac8	B0
chr11	67158089	67158373	+	AluSx1	hg19|panTro5|gorGor3|ponAbe2|rheMac8	B0
chr11	6732190	6732497	-	AluSx1	hg19|panTro5|gorGor3|ponAbe2|rheMac8	B0
chr1	167344023	167344266	+	AluY	hg19|panTro5|gorGor3|ponAbe2|rheMac8	B0
chr1	167613434	167613721	+	AluSp	hg19|panTro5|gorGor3|ponAbe2|rheMac8	B0
chr1	167633994	167634303	+	AluSx	hg19|panTro5|gorGor3|ponAbe2|rheMac8	B0
chr1	167644162	167644469	+	AluSc8	hg19|panTro5|gorGor3|ponAbe2|rheMac8	B0
chr1	167689637	167689842	-	AluSx3	hg19|panTro5|gorGor3|ponAbe2|rheMac8	B0
chr1	16772118	16772420	+	AluSz6	hg19|panTro5|gorGor3|ponAbe2|rheMac8	B0
chr11	67852704	67852987	-	AluJb	hg19|panTro5|gorGor3|ponAbe2|rheMac8	B0
chr11	67856229	67856313	-	AluSx	hg19|panTro5|gorGor3|ponAbe2|rheMac8	B0
chr11	67860463	67860766	-	AluJb	hg19|panTro5|gorGor3|ponAbe2|rheMac8	B0
chr1	167920530	167920833	+	AluSz	hg19|panTro5|gorGor3|ponAbe2|rheMac8	B0
chr11	67955481	67955790	-	AluY	hg19|panTro5|gorGor3|ponAbe2|rheMac8	B0
chr1	167980933	167981238	+	AluSx	hg19|panTro5|gorGor3|ponAbe2|rheMac8	B0
chr1	168003473	168003745	+	AluJr4	hg19|panTro5|gorGor3|ponAbe2|rheMac8	B0
chr1	168050098	168050400	-	AluSp	hg19|panTro5|gorGor3|ponAbe2|rheMac8	B0
chr1	168220259	168220573	+	AluSz6	hg19|panTro5|gorGor3|ponAbe2|rheMac8	B0
chr1	16824216	16824496	-	AluJo	hg19|panTro5|gorGor3|ponAbe2|rheMac8	B0
chr11	68330493	68330662	+	AluJo	hg19|panTro5|gorGor3|ponAbe2|rheMac8	B0
chr11	68340035	68340308	+	AluJr	hg19|panTro5|gorGor3|ponAbe2|rheMac8	B0
chr11	68361204	68361419	+	AluJb	hg19|panTro5|gorGor3|ponAbe2|rheMac8	B0
chr11	68365163	68365460	+	AluSz	hg19|panTro5|gorGor3|ponAbe2|rheMac8	B0
chr11	68522863	68523174	-	AluY	hg19|panTro5|gorGor3|ponAbe2|rheMac8	B0
chr11	68561872	68562178	-	AluSq2	hg19|panTro5|gorGor3|ponAbe2|rheMac8	B0
chr11	68646643	68646879	-	AluSp	hg19|panTro5|gorGor3|ponAbe2|rheMac8	B0
chr11	68713598	68713907	+	AluSx	hg19|panTro5|gorGor3|ponAbe2|rheMac8	B0
chr1	169084147	169084446	+	AluY	hg19|panTro5|gorGor3|ponAbe2|rheMac8	B0
chr1	169099745	169100045	+	AluSg	hg19|panTro5|gorGor3|ponAbe2|rheMac8	B0
chr1	169447577	169447913	-	AluJb	hg19|panTro5|gorGor3|ponAbe2|rheMac8	B0
chr11	69488630	69488920	-	AluY	hg19|panTro5|gorGor3|ponAbe2|rheMac8	B0
chr1	169593710	169594005	+	AluSz	hg19|panTro5|gorGor3|ponAbe2|rheMac8	B0
chr11	69675269	69675580	+	AluJb	hg19|panTro5|gorGor3|ponAbe2|rheMac8	B0
chr1	169820492	169820637	-	AluJr	hg19|panTro5|gorGor3|ponAbe2|rheMac8	B0
chr11	69941030	69941319	+	AluSx1	hg19|panTro5|gorGor3|ponAbe2|rheMac8	B0
chr11	70149829	70150139	+	AluSz	hg19|panTro5|gorGor3|ponAbe2|rheMac8	B0
chr11	70157169	70157434	+	AluSp	hg19|panTro5|gorGor3|ponAbe2|rheMac8	B0
chr11	70258251	70258538	+	AluJo	hg19|panTro5|gorGor3|ponAbe2|rheMac8	B0
chr1	170675988	170676295	+	AluJo	hg19|panTro5|gorGor3|ponAbe2|rheMac8	B0
chr11	70992484	70992772	-	AluSz6	hg19|panTro5|gorGor3|ponAbe2|rheMac8	B0
chr1	171172205	171172462	+	AluJb	hg19|panTro5|gorGor3|ponAbe2|rheMac8	B0
chr1	171468647	171468957	+	AluSx1	hg19|panTro5|gorGor3|ponAbe2|rheMac8	B0
chr1	171516083	171516242	+	AluSp	hg19|panTro5|gorGor3|ponAbe2|rheMac8	B0
chr11	71658271	71658541	+	AluJo	hg19|panTro5|gorGor3|ponAbe2|rheMac8	B0
chr11	71732671	71732959	-	AluJr4	hg19|panTro5|gorGor3|ponAbe2|rheMac8	B0
chr11	72176208	72176500	-	AluSz	hg19|panTro5|gorGor3|ponAbe2|rheMac8	B0
chr11	72184827	72185111	-	AluSg	hg19|panTro5|gorGor3|ponAbe2|rheMac8	B0
chr11	72471249	72471262	-	AluSx	hg19|panTro5|gorGor3|ponAbe2|rheMac8	B0
chr11	72672278	72672450	-	AluJb	hg19|panTro5|gorGor3|ponAbe2|rheMac8	B0
chr11	72672479	72672600	-	AluJb	hg19|panTro5|gorGor3|ponAbe2|rheMac8	B0
chr11	72725165	72725457	-	AluJr	hg19|panTro5|gorGor3|ponAbe2|rheMac8	B0
chr11	72728034	72728323	-	AluJb	hg19|panTro5|gorGor3|ponAbe2|rheMac8	B0
chr11	72789771	72790063	-	AluJo	hg19|panTro5|gorGor3|ponAbe2|rheMac8	B0
chr11	72824401	72824636	-	AluJb	hg19|panTro5|gorGor3|ponAbe2|rheMac8	B0
chr11	72830513	72830791	-	AluJr4	hg19|panTro5|gorGor3|ponAbe2|rheMac8	B0
chr1	17310519	17310830	+	AluJb	hg19|panTro5|gorGor3|ponAbe2|rheMac8	B0
chr11	73224240	73224555	-	AluY	hg19|panTro5|gorGor3|ponAbe2|rheMac8	B0
chr11	73298801	73299094	-	AluSx	hg19|panTro5|gorGor3|ponAbe2|rheMac8	B0
chr11	73398447	73398527	-	AluJo	hg19|panTro5|gorGor3|ponAbe2|rheMac8	B0
chr11	73410306	73410614	-	AluJr	hg19|panTro5|gorGor3|ponAbe2|rheMac8	B0
chr11	73412684	73412990	-	AluJb	hg19|panTro5|gorGor3|ponAbe2|rheMac8	B0
chr11	73431225	73431526	-	AluSq2	hg19|panTro5|gorGor3|ponAbe2|rheMac8	B0
chr1	173750074	173750126	+	AluJb	hg19|panTro5|gorGor3|ponAbe2|rheMac8	B0
chr11	73801291	73801396	+	AluSz	hg19|panTro5|gorGor3|ponAbe2|rheMac8	B0
chr1	173914263	173914563	-	AluJb	hg19|panTro5|gorGor3|ponAbe2|rheMac8	B0
chr1	173949047	173949311	-	AluJr	hg19|panTro5|gorGor3|ponAbe2|rheMac8	B0
chr1	173976599	173976895	-	AluJr	hg19|panTro5|gorGor3|ponAbe2|rheMac8	B0
chr1	173979549	173979812	-	AluJb	hg19|panTro5|gorGor3|ponAbe2|rheMac8	B0
chr11	74042308	74042606	-	AluSp	hg19|panTro5|gorGor3|ponAbe2|rheMac8	B0
chr1	17409370	17409667	-	AluJr4	hg19|panTro5|gorGor3|ponAbe2|rheMac8	B0
chr11	74166762	74167027	-	AluSx1	hg19|panTro5|gorGor3|ponAbe2|rheMac8	B0
chr11	74258088	74258415	+	AluJr	hg19|panTro5|gorGor3|ponAbe2|rheMac8	B0
chr1	174399240	174399510	+	AluJb	hg19|panTro5|gorGor3|ponAbe2|rheMac8	B0
chr1	174410591	174410915	+	AluSq2	hg19|panTro5|gorGor3|ponAbe2|rheMac8	B0
chr1	174546038	174546332	+	AluJr4	hg19|panTro5|gorGor3|ponAbe2|rheMac8	B0
chr1	174801148	174801460	+	AluSx1	hg19|panTro5|gorGor3|ponAbe2|rheMac8	B0
chr1	174834331	174834487	+	AluSx	hg19|panTro5|gorGor3|ponAbe2|rheMac8	B0
chr1	174873362	174873518	+	AluJr	hg19|panTro5|gorGor3|ponAbe2|rheMac8	B0
chr1	174874707	174875017	+	AluSx1	hg19|panTro5|gorGor3|ponAbe2|rheMac8	B0
chr11	74883692	74883987	+	AluSc8	hg19|panTro5|gorGor3|ponAbe2|rheMac8	B0
chr11	74888858	74889166	+	AluSx1	hg19|panTro5|gorGor3|ponAbe2|rheMac8	B0
chr11	74893506	74893797	+	AluSx	hg19|panTro5|gorGor3|ponAbe2|rheMac8	B0
chr11	7490699	7491016	+	AluJo	hg19|panTro5|gorGor3|ponAbe2|rheMac8	B0
chr1	174980102	174980261	+	AluJr	hg19|panTro5|gorGor3|ponAbe2|rheMac8	B0
chr11	75037766	75038048	-	AluJb	hg19|panTro5|gorGor3|ponAbe2|rheMac8	B0
chr11	75119266	75119534	+	AluJb	hg19|panTro5|gorGor3|ponAbe2|rheMac8	B0
chr1	17562967	17563279	+	AluJb	hg19|panTro5|gorGor3|ponAbe2|rheMac8	B0
chr1	175691592	175691902	-	AluSz	hg19|panTro5|gorGor3|ponAbe2|rheMac8	B0
chr1	17574849	17575148	+	AluSp	hg19|panTro5|gorGor3|ponAbe2|rheMac8	B0
chr1	175937000	175937304	-	AluSx1	hg19|panTro5|gorGor3|ponAbe2|rheMac8	B0
chr11	75950156	75950460	-	AluSx	hg19|panTro5|gorGor3|ponAbe2|rheMac8	B0
chr1	176009454	176009744	-	AluJr4	hg19|panTro5|gorGor3|ponAbe2|rheMac8	B0
chr1	176010472	176010788	-	AluSz6	hg19|panTro5|gorGor3|ponAbe2|rheMac8	B0
chr1	176033789	176034058	-	AluJb	hg19|panTro5|gorGor3|ponAbe2|rheMac8	B0
chr1	176039476	176039517	-	AluJb	hg19|panTro5|gorGor3|ponAbe2|rheMac8	B0
chr1	176039818	176040088	-	AluJb	hg19|panTro5|gorGor3|ponAbe2|rheMac8	B0
chr1	176083741	176083937	-	AluJb	hg19|panTro5|gorGor3|ponAbe2|rheMac8	B0
chr1	176110860	176111166	-	AluJr	hg19|panTro5|gorGor3|ponAbe2|rheMac8	B0
chr1	1761177	1761478	-	AluSq	hg19|panTro5|gorGor3|ponAbe2|rheMac8	B0
chr11	76235785	76236058	+	AluJb	hg19|panTro5|gorGor3|ponAbe2|rheMac8	B0
chr1	176431538	176431834	-	AluJr	hg19|panTro5|gorGor3|ponAbe2|rheMac8	B0
chr11	76697831	76698134	+	AluSx	hg19|panTro5|gorGor3|ponAbe2|rheMac8	B0
chr11	76708678	76708905	+	AluJo	hg19|panTro5|gorGor3|ponAbe2|rheMac8	B0
chr11	76719817	76720107	+	AluJr	hg19|panTro5|gorGor3|ponAbe2|rheMac8	B0
chr11	76752723	76753020	+	AluSg	hg19|panTro5|gorGor3|ponAbe2|rheMac8	B0
chr11	76754471	76754776	+	AluY	hg19|panTro5|gorGor3|ponAbe2|rheMac8	B0
chr11	76907131	76907425	+	AluSq2	hg19|panTro5|gorGor3|ponAbe2|rheMac8	B0
chr11	769315	769608	-	AluSq2	hg19|panTro5|gorGor3|ponAbe2|rheMac8	B0
chr11	77383413	77383575	-	AluJb	hg19|panTro5|gorGor3|ponAbe2|rheMac8	B0
chr11	77392511	77392624	-	AluJo	hg19|panTro5|gorGor3|ponAbe2|rheMac8	B0
chr11	77537145	77537418	+	AluSg	hg19|panTro5|gorGor3|ponAbe2|rheMac8	B0
chr11	77882681	77882950	-	AluSx1	hg19|panTro5|gorGor3|ponAbe2|rheMac8	B0
chr11	77942416	77942693	-	AluSg	hg19|panTro5|gorGor3|ponAbe2|rheMac8	B0
chr11	78064205	78064499	+	AluSz	hg19|panTro5|gorGor3|ponAbe2|rheMac8	B0
chr1	178068813	178069109	+	AluSz	hg19|panTro5|gorGor3|ponAbe2|rheMac8	B0
chr1	178078873	178079172	+	AluJr4	hg19|panTro5|gorGor3|ponAbe2|rheMac8	B0
chr11	78117427	78117711	-	AluSx1	hg19|panTro5|gorGor3|ponAbe2|rheMac8	B0
chr11	78125918	78126215	-	AluSx1	hg19|panTro5|gorGor3|ponAbe2|rheMac8	B0
chr1	178149496	178149798	+	AluJb	hg19|panTro5|gorGor3|ponAbe2|rheMac8	B0
chr1	1781571	1781871	-	AluSp	hg19|panTro5|gorGor3|ponAbe2|rheMac8	B0
chr11	78184065	78184224	+	AluJo	hg19|panTro5|gorGor3|ponAbe2|rheMac8	B0
chr1	178298868	178299010	+	AluJo	hg19|panTro5|gorGor3|ponAbe2|rheMac8	B0
chr1	178416526	178416836	+	AluSq2	hg19|panTro5|gorGor3|ponAbe2|rheMac8	B0
chr1	17852216	17852526	+	AluSz	hg19|panTro5|gorGor3|ponAbe2|rheMac8	B0
chr1	17862692	17862990	+	AluJb	hg19|panTro5|gorGor3|ponAbe2|rheMac8	B0
chr1	178712068	178712367	+	AluJr4	hg19|panTro5|gorGor3|ponAbe2|rheMac8	B0
chr1	1787866	1788164	-	AluSc	hg19|panTro5|gorGor3|ponAbe2|rheMac8	B0
chr11	7889566	7889729	-	AluJb	hg19|panTro5|gorGor3|ponAbe2|rheMac8	B0
chr1	179044043	179044339	+	AluSx	hg19|panTro5|gorGor3|ponAbe2|rheMac8	B0
chr1	179070512	179070805	-	AluSz	hg19|panTro5|gorGor3|ponAbe2|rheMac8	B0
chr1	179117164	179117474	-	AluJb	hg19|panTro5|gorGor3|ponAbe2|rheMac8	B0
chr1	179150906	179151231	-	AluSc8	hg19|panTro5|gorGor3|ponAbe2|rheMac8	B0
chr1	17925576	17925856	+	AluSx	hg19|panTro5|gorGor3|ponAbe2|rheMac8	B0
chr1	179334233	179334522	+	AluSx4	hg19|panTro5|gorGor3|ponAbe2|rheMac8	B0
chr1	17933687	17933979	+	AluJo	hg19|panTro5|gorGor3|ponAbe2|rheMac8	B0
chr1	17968191	17968505	+	AluSx	hg19|panTro5|gorGor3|ponAbe2|rheMac8	B0
chr1	179825771	179826049	-	AluSz6	hg19|panTro5|gorGor3|ponAbe2|rheMac8	B0
chr1	179844126	179844437	-	AluSx1	hg19|panTro5|gorGor3|ponAbe2|rheMac8	B0
chr1	179888159	179888412	+	AluSq2	hg19|panTro5|gorGor3|ponAbe2|rheMac8	B0
chr1	179943844	179944155	+	AluJr4	hg19|panTro5|gorGor3|ponAbe2|rheMac8	B0
chr1	179971331	179971638	+	AluSz	hg19|panTro5|gorGor3|ponAbe2|rheMac8	B0
chr1	179992299	179992426	+	AluSz6	hg19|panTro5|gorGor3|ponAbe2|rheMac8	B0
chr1	180046986	180047281	+	AluSq	hg19|panTro5|gorGor3|ponAbe2|rheMac8	B0
chr1	180144024	180144321	+	AluSx3	hg19|panTro5|gorGor3|ponAbe2|rheMac8	B0
chr11	8020528	8020822	+	AluSz6	hg19|panTro5|gorGor3|ponAbe2|rheMac8	B0
chr11	8021468	8021767	+	AluSx1	hg19|panTro5|gorGor3|ponAbe2|rheMac8	B0
chr1	1803435	1803716	-	AluJo	hg19|panTro5|gorGor3|ponAbe2|rheMac8	B0
chr1	180696514	180696785	+	AluSq2	hg19|panTro5|gorGor3|ponAbe2|rheMac8	B0
chr1	180856028	180856333	+	AluSg	hg19|panTro5|gorGor3|ponAbe2|rheMac8	B0
chr1	180909843	180910012	-	AluJb	hg19|panTro5|gorGor3|ponAbe2|rheMac8	B0
chr11	81276609	81276908	-	AluJb	hg19|panTro5|gorGor3|ponAbe2|rheMac8	B0
chr1	1815406	1815571	-	AluSx	hg19|panTro5|gorGor3|ponAbe2|rheMac8	B0
chr1	182163327	182163622	+	AluJr	hg19|panTro5|gorGor3|ponAbe2|rheMac8	B0
chr1	182349439	182349730	-	AluJr	hg19|panTro5|gorGor3|ponAbe2|rheMac8	B0
chr11	82724114	82724426	-	AluSz	hg19|panTro5|gorGor3|ponAbe2|rheMac8	B0
chr1	182774282	182774589	+	AluSq2	hg19|panTro5|gorGor3|ponAbe2|rheMac8	B0
chr11	82786286	82786584	+	AluSq4	hg19|panTro5|gorGor3|ponAbe2|rheMac8	B0
chr11	82790964	82791109	+	AluJr4	hg19|panTro5|gorGor3|ponAbe2|rheMac8	B0
chr1	182810145	182810445	+	AluSc8	hg19|panTro5|gorGor3|ponAbe2|rheMac8	B0
chr1	182849985	182850052	+	AluJo	hg19|panTro5|gorGor3|ponAbe2|rheMac8	B0
chr11	82894910	82895215	+	AluSx1	hg19|panTro5|gorGor3|ponAbe2|rheMac8	B0
chr11	82901037	82901337	-	AluSc	hg19|panTro5|gorGor3|ponAbe2|rheMac8	B0
chr11	82901339	82901449	-	AluJb	hg19|panTro5|gorGor3|ponAbe2|rheMac8	B0
chr1	183028530	183028667	+	AluSq2	hg19|panTro5|gorGor3|ponAbe2|rheMac8	B0
chr1	183037794	183038094	+	AluSc8	hg19|panTro5|gorGor3|ponAbe2|rheMac8	B0
chr1	183089025	183089325	+	AluJr4	hg19|panTro5|gorGor3|ponAbe2|rheMac8	B0
chr1	183100027	183100325	+	AluSp	hg19|panTro5|gorGor3|ponAbe2|rheMac8	B0
chr1	183107908	183108191	+	AluSx1	hg19|panTro5|gorGor3|ponAbe2|rheMac8	B0
chr1	183158444	183158665	+	AluJb	hg19|panTro5|gorGor3|ponAbe2|rheMac8	B0
chr1	183379882	183380152	-	AluJo	hg19|panTro5|gorGor3|ponAbe2|rheMac8	B0
chr11	83383220	83383519	-	AluSp	hg19|panTro5|gorGor3|ponAbe2|rheMac8	B0
chr11	83657022	83657330	-	AluSx1	hg19|panTro5|gorGor3|ponAbe2|rheMac8	B0
chr1	183866381	183866700	+	AluSx	hg19|panTro5|gorGor3|ponAbe2|rheMac8	B0
chr1	1840847	1841145	+	AluSx1	hg19|panTro5|gorGor3|ponAbe2|rheMac8	B0
chr11	84106447	84106676	-	AluJb	hg19|panTro5|gorGor3|ponAbe2|rheMac8	B0
chr11	84117347	84117682	-	AluJb	hg19|panTro5|gorGor3|ponAbe2|rheMac8	B0
chr11	84219443	84219742	-	AluSx1	hg19|panTro5|gorGor3|ponAbe2|rheMac8	B0
chr1	184460470	184460785	-	AluJb	hg19|panTro5|gorGor3|ponAbe2|rheMac8	B0
chr1	184520862	184521092	+	AluJr4	hg19|panTro5|gorGor3|ponAbe2|rheMac8	B0
chr1	184550278	184550578	+	AluSx	hg19|panTro5|gorGor3|ponAbe2|rheMac8	B0
chr11	84556726	84557013	-	AluSg	hg19|panTro5|gorGor3|ponAbe2|rheMac8	B0
chr11	84568935	84569235	-	AluJb	hg19|panTro5|gorGor3|ponAbe2|rheMac8	B0
chr1	184575427	184575728	+	AluJr	hg19|panTro5|gorGor3|ponAbe2|rheMac8	B0
chr1	184581577	184581829	+	AluSx	hg19|panTro5|gorGor3|ponAbe2|rheMac8	B0
chr1	184583019	184583156	+	AluSx	hg19|panTro5|gorGor3|ponAbe2|rheMac8	B0
chr11	84615967	84616224	-	AluJb	hg19|panTro5|gorGor3|ponAbe2|rheMac8	B0
chr1	184761093	184761374	-	AluJo	hg19|panTro5|gorGor3|ponAbe2|rheMac8	B0
chr1	184924497	184924766	-	AluSc	hg19|panTro5|gorGor3|ponAbe2|rheMac8	B0
chr1	184925148	184925432	-	AluJo	hg19|panTro5|gorGor3|ponAbe2|rheMac8	B0
chr11	85408259	85408376	-	AluSz6	hg19|panTro5|gorGor3|ponAbe2|rheMac8	B0
chr11	85417862	85418183	-	AluSx	hg19|panTro5|gorGor3|ponAbe2|rheMac8	B0
chr11	85508912	85509201	-	AluSz	hg19|panTro5|gorGor3|ponAbe2|rheMac8	B0
chr11	85513252	85513473	-	AluSx1	hg19|panTro5|gorGor3|ponAbe2|rheMac8	B0
chr11	85666039	85666324	-	AluJb	hg19|panTro5|gorGor3|ponAbe2|rheMac8	B0
chr11	85674820	85675022	-	AluJr	hg19|panTro5|gorGor3|ponAbe2|rheMac8	B0
chr11	85676851	85677161	-	AluSg	hg19|panTro5|gorGor3|ponAbe2|rheMac8	B0
chr11	85702896	85703178	-	AluJr	hg19|panTro5|gorGor3|ponAbe2|rheMac8	B0
chr11	85704484	85704775	-	AluSz	hg19|panTro5|gorGor3|ponAbe2|rheMac8	B0
chr11	85705781	85706046	-	AluSz6	hg19|panTro5|gorGor3|ponAbe2|rheMac8	B0
chr11	85708512	85708813	-	AluSx	hg19|panTro5|gorGor3|ponAbe2|rheMac8	B0
chr11	85709892	85709976	-	AluJo	hg19|panTro5|gorGor3|ponAbe2|rheMac8	B0
chr11	85722888	85723015	-	AluSq2	hg19|panTro5|gorGor3|ponAbe2|rheMac8	B0
chr11	85751417	85751545	-	AluJo	hg19|panTro5|gorGor3|ponAbe2|rheMac8	B0
chr11	85764621	85764905	-	AluJb	hg19|panTro5|gorGor3|ponAbe2|rheMac8	B0
chr11	85765822	85765866	-	AluSp	hg19|panTro5|gorGor3|ponAbe2|rheMac8	B0
chr11	85765867	85765978	-	AluSp	hg19|panTro5|gorGor3|ponAbe2|rheMac8	B0
chr1	185766448	185766712	-	AluJr4	hg19|panTro5|gorGor3|ponAbe2|rheMac8	B0
chr1	186146155	186146452	+	AluSc8	hg19|panTro5|gorGor3|ponAbe2|rheMac8	B0
chr11	86227447	86227732	-	AluSx3	hg19|panTro5|gorGor3|ponAbe2|rheMac8	B0
chr1	186326183	186326477	-	AluJo	hg19|panTro5|gorGor3|ponAbe2|rheMac8	B0
chr1	186388562	186388876	+	AluJr	hg19|panTro5|gorGor3|ponAbe2|rheMac8	B0
chr11	86552099	86552411	+	AluSp	hg19|panTro5|gorGor3|ponAbe2|rheMac8	B0
chr11	86622834	86623118	-	AluJo	hg19|panTro5|gorGor3|ponAbe2|rheMac8	B0
chr11	8708742	8708937	+	AluSp	hg19|panTro5|gorGor3|ponAbe2|rheMac8	B0
chr11	8759327	8759590	-	AluJr	hg19|panTro5|gorGor3|ponAbe2|rheMac8	B0
chr11	88028551	88028848	-	AluJb	hg19|panTro5|gorGor3|ponAbe2|rheMac8	B0
chr1	188883793	188884092	+	AluSg	hg19|panTro5|gorGor3|ponAbe2|rheMac8	B0
chr11	88924780	88924918	+	AluJo	hg19|panTro5|gorGor3|ponAbe2|rheMac8	B0
chr11	89085982	89086265	-	AluSx	hg19|panTro5|gorGor3|ponAbe2|rheMac8	B0
chr11	89185882	89186035	-	AluJb	hg19|panTro5|gorGor3|ponAbe2|rheMac8	B0
chr11	89201908	89202197	-	AluJr	hg19|panTro5|gorGor3|ponAbe2|rheMac8	B0
chr11	89204894	89205209	-	AluSz	hg19|panTro5|gorGor3|ponAbe2|rheMac8	B0
chr11	89384430	89384686	-	AluSg	hg19|panTro5|gorGor3|ponAbe2|rheMac8	B0
chr11	90374861	90375153	+	AluSg7	hg19|panTro5|gorGor3|ponAbe2|rheMac8	B0
chr1	190412036	190412328	-	AluSq2	hg19|panTro5|gorGor3|ponAbe2|rheMac8	B0
chr11	90464901	90465190	+	AluJo	hg19|panTro5|gorGor3|ponAbe2|rheMac8	B0
chr1	192117650	192117963	+	AluSq	hg19|panTro5|gorGor3|ponAbe2|rheMac8	B0
chr1	19260548	19260865	-	AluJb	hg19|panTro5|gorGor3|ponAbe2|rheMac8	B0
chr11	9269537	9269828	-	AluJb	hg19|panTro5|gorGor3|ponAbe2|rheMac8	B0
chr1	19272899	19273210	-	AluSg4	hg19|panTro5|gorGor3|ponAbe2|rheMac8	B0
chr11	9281146	9281253	-	AluJo	hg19|panTro5|gorGor3|ponAbe2|rheMac8	B0
chr11	9284743	9285081	-	AluSx	hg19|panTro5|gorGor3|ponAbe2|rheMac8	B0
chr11	9318642	9318931	-	AluY	hg19|panTro5|gorGor3|ponAbe2|rheMac8	B0
chr11	93467947	93468219	-	AluJr	hg19|panTro5|gorGor3|ponAbe2|rheMac8	B0
chr11	93482373	93482693	+	AluJb	hg19|panTro5|gorGor3|ponAbe2|rheMac8	B0
chr11	93496629	93496937	+	AluJr	hg19|panTro5|gorGor3|ponAbe2|rheMac8	B0
chr11	94150146	94150442	-	AluSq2	hg19|panTro5|gorGor3|ponAbe2|rheMac8	B0
chr11	94803249	94803561	+	AluSp	hg19|panTro5|gorGor3|ponAbe2|rheMac8	B0
chr11	94930599	94930744	-	AluSq2	hg19|panTro5|gorGor3|ponAbe2|rheMac8	B0
chr1	195527394	195527704	-	AluSz	hg19|panTro5|gorGor3|ponAbe2|rheMac8	B0
chr1	195567526	195567851	-	AluSz	hg19|panTro5|gorGor3|ponAbe2|rheMac8	B0
chr1	195570596	195570901	-	AluSc	hg19|panTro5|gorGor3|ponAbe2|rheMac8	B0
chr1	19578848	19578909	-	AluJb	hg19|panTro5|gorGor3|ponAbe2|rheMac8	B0
chr1	19585474	19585774	+	AluSc8	hg19|panTro5|gorGor3|ponAbe2|rheMac8	B0
chr1	19592789	19593096	-	AluJr	hg19|panTro5|gorGor3|ponAbe2|rheMac8	B0
chr11	95987977	95988293	-	AluJb	hg19|panTro5|gorGor3|ponAbe2|rheMac8	B0
chr11	95995631	95995905	-	AluY	hg19|panTro5|gorGor3|ponAbe2|rheMac8	B0
chr11	96003479	96003772	-	AluSx3	hg19|panTro5|gorGor3|ponAbe2|rheMac8	B0
chr11	96007235	96007545	-	AluY	hg19|panTro5|gorGor3|ponAbe2|rheMac8	B0
chr11	96008433	96008732	-	AluY	hg19|panTro5|gorGor3|ponAbe2|rheMac8	B0
chr11	96024279	96024590	-	AluSq2	hg19|panTro5|gorGor3|ponAbe2|rheMac8	B0
chr11	96042860	96043166	-	AluJb	hg19|panTro5|gorGor3|ponAbe2|rheMac8	B0
chr11	96182925	96183208	+	AluJb	hg19|panTro5|gorGor3|ponAbe2|rheMac8	B0
chr1	196233764	196234060	-	AluJb	hg19|panTro5|gorGor3|ponAbe2|rheMac8	B0
chr1	19628171	19628483	-	AluJb	hg19|panTro5|gorGor3|ponAbe2|rheMac8	B0
chr11	963148	963451	+	AluSx1	hg19|panTro5|gorGor3|ponAbe2|rheMac8	B0
chr1	196335294	196335587	-	AluSp	hg19|panTro5|gorGor3|ponAbe2|rheMac8	B0
chr1	196625153	196625461	+	AluSg	hg19|panTro5|gorGor3|ponAbe2|rheMac8	B0
chr1	196635635	196635955	+	AluY	hg19|panTro5|gorGor3|ponAbe2|rheMac8	B0
chr1	196672833	196673135	+	AluY	hg19|panTro5|gorGor3|ponAbe2|rheMac8	B0
chr1	196763313	196763605	+	AluSx	hg19|panTro5|gorGor3|ponAbe2|rheMac8	B0
chr1	19689577	19689812	-	AluJo	hg19|panTro5|gorGor3|ponAbe2|rheMac8	B0
chr11	9696562	9696842	+	AluJo	hg19|panTro5|gorGor3|ponAbe2|rheMac8	B0
chr11	9704664	9704990	+	AluJb	hg19|panTro5|gorGor3|ponAbe2|rheMac8	B0
chr11	9740372	9740657	+	AluJb	hg19|panTro5|gorGor3|ponAbe2|rheMac8	B0
chr11	9771602	9771916	+	AluSx1	hg19|panTro5|gorGor3|ponAbe2|rheMac8	B0
chr11	9834877	9835172	-	AluSc	hg19|panTro5|gorGor3|ponAbe2|rheMac8	B0
chr1	198649338	198649596	+	AluSx	hg19|panTro5|gorGor3|ponAbe2|rheMac8	B0
chr1	198846964	198847084	-	AluYc	hg19|panTro5|gorGor3|ponAbe2|rheMac8	B0
chr1	198853856	198854136	-	AluJb	hg19|panTro5|gorGor3|ponAbe2|rheMac8	B0
chr11	9886454	9886678	-	AluJr	hg19|panTro5|gorGor3|ponAbe2|rheMac8	B0
chr11	988851	989003	+	AluJb	hg19|panTro5|gorGor3|ponAbe2|rheMac8	B0
chr1	199092272	199092568	+	AluJo	hg19|panTro5|gorGor3|ponAbe2|rheMac8	B0
chr11	99104396	99104702	+	AluY	hg19|panTro5|gorGor3|ponAbe2|rheMac8	B0
chr1	19940977	19941110	-	AluSc8	hg19|panTro5|gorGor3|ponAbe2|rheMac8	B0
chr1	200033016	200033291	+	AluSx	hg19|panTro5|gorGor3|ponAbe2|rheMac8	B0
chr1	200036403	200036693	+	AluSp	hg19|panTro5|gorGor3|ponAbe2|rheMac8	B0
chr1	200074797	200075016	+	AluJr	hg19|panTro5|gorGor3|ponAbe2|rheMac8	B0
chr1	200722142	200722445	+	AluSz	hg19|panTro5|gorGor3|ponAbe2|rheMac8	B0
chr1	200745707	200745868	+	AluSx1	hg19|panTro5|gorGor3|ponAbe2|rheMac8	B0
chr1	200867888	200868114	+	AluSc8	hg19|panTro5|gorGor3|ponAbe2|rheMac8	B0
chr1	200874391	200874686	+	AluJo	hg19|panTro5|gorGor3|ponAbe2|rheMac8	B0
chr1	20089561	20089870	-	AluSx1	hg19|panTro5|gorGor3|ponAbe2|rheMac8	B0
chr1	201078093	201078390	+	AluSx1	hg19|panTro5|gorGor3|ponAbe2|rheMac8	B0
chr1	201274363	201274658	+	AluJr	hg19|panTro5|gorGor3|ponAbe2|rheMac8	B0
chr1	201342772	201342996	-	AluJb	hg19|panTro5|gorGor3|ponAbe2|rheMac8	B0
chr1	201573522	201573836	+	AluSz	hg19|panTro5|gorGor3|ponAbe2|rheMac8	B0
chr1	201703253	201703559	+	AluJr	hg19|panTro5|gorGor3|ponAbe2|rheMac8	B0
chr1	201717993	201718288	+	AluSx1	hg19|panTro5|gorGor3|ponAbe2|rheMac8	B0
chr1	201724370	201724572	+	AluJb	hg19|panTro5|gorGor3|ponAbe2|rheMac8	B0
chr1	201730998	201731318	+	AluJr	hg19|panTro5|gorGor3|ponAbe2|rheMac8	B0
chr1	201740393	201740650	+	AluSq10	hg19|panTro5|gorGor3|ponAbe2|rheMac8	B0
chr1	201745490	201745784	+	AluSc8	hg19|panTro5|gorGor3|ponAbe2|rheMac8	B0
chr1	201746796	201747053	+	AluSz6	hg19|panTro5|gorGor3|ponAbe2|rheMac8	B0
chr1	201771626	201771935	+	AluSg7	hg19|panTro5|gorGor3|ponAbe2|rheMac8	B0
chr1	201846346	201846601	+	AluSz	hg19|panTro5|gorGor3|ponAbe2|rheMac8	B0
chr1	201846769	201847082	+	AluSq2	hg19|panTro5|gorGor3|ponAbe2|rheMac8	B0
chr1	201873326	201873637	-	AluSp	hg19|panTro5|gorGor3|ponAbe2|rheMac8	B0
chr1	201879872	201880047	-	AluSg4	hg19|panTro5|gorGor3|ponAbe2|rheMac8	B0
chr1	201888027	201888316	-	AluJr4	hg19|panTro5|gorGor3|ponAbe2|rheMac8	B0
chr1	201888344	201888631	-	AluSx1	hg19|panTro5|gorGor3|ponAbe2|rheMac8	B0
chr1	201891960	201892252	-	AluSx	hg19|panTro5|gorGor3|ponAbe2|rheMac8	B0
chr1	201894816	201895141	-	AluJr	hg19|panTro5|gorGor3|ponAbe2|rheMac8	B0
chr1	201909311	201909612	-	AluSc	hg19|panTro5|gorGor3|ponAbe2|rheMac8	B0
chr1	201909713	201909876	-	AluSx	hg19|panTro5|gorGor3|ponAbe2|rheMac8	B0
chr1	201909876	201910174	-	AluSp	hg19|panTro5|gorGor3|ponAbe2|rheMac8	B0
chr1	201910174	201910384	-	AluSx	hg19|panTro5|gorGor3|ponAbe2|rheMac8	B0
chr1	201927548	201927841	+	AluJb	hg19|panTro5|gorGor3|ponAbe2|rheMac8	B0
chr1	201980717	201981022	+	AluSq2	hg19|panTro5|gorGor3|ponAbe2|rheMac8	B0
chr1	202268105	202268407	+	AluSz	hg19|panTro5|gorGor3|ponAbe2|rheMac8	B0
chr1	202512587	202512885	+	AluSq2	hg19|panTro5|gorGor3|ponAbe2|rheMac8	B0
chr1	202515453	202515747	+	AluJr4	hg19|panTro5|gorGor3|ponAbe2|rheMac8	B0
chr1	202543355	202543645	+	AluJr	hg19|panTro5|gorGor3|ponAbe2|rheMac8	B0
chr1	203269040	203269229	+	AluSx	hg19|panTro5|gorGor3|ponAbe2|rheMac8	B0
chr1	203429702	203429998	+	AluSg	hg19|panTro5|gorGor3|ponAbe2|rheMac8	B0
chr1	203457361	203457666	+	AluSx	hg19|panTro5|gorGor3|ponAbe2|rheMac8	B0
chr1	203458803	203459113	+	AluSx	hg19|panTro5|gorGor3|ponAbe2|rheMac8	B0
chr1	203532983	203533295	-	AluSx1	hg19|panTro5|gorGor3|ponAbe2|rheMac8	B0
chr1	203627368	203627686	+	AluJo	hg19|panTro5|gorGor3|ponAbe2|rheMac8	B0
chr1	203779990	203780289	+	AluSq	hg19|panTro5|gorGor3|ponAbe2|rheMac8	B0
chr1	20395885	20396211	+	AluJb	hg19|panTro5|gorGor3|ponAbe2|rheMac8	B0
chr1	204067323	204067614	+	AluSx	hg19|panTro5|gorGor3|ponAbe2|rheMac8	B0
chr1	20408279	20408546	+	AluSc8	hg19|panTro5|gorGor3|ponAbe2|rheMac8	B0
chr1	204200684	204200993	-	AluJr	hg19|panTro5|gorGor3|ponAbe2|rheMac8	B0
chr1	204417228	204417529	-	AluSx1	hg19|panTro5|gorGor3|ponAbe2|rheMac8	B0
chr1	204454697	204454994	-	AluSx3	hg19|panTro5|gorGor3|ponAbe2|rheMac8	B0
chr1	204505113	204505394	+	AluSg4	hg19|panTro5|gorGor3|ponAbe2|rheMac8	B0
chr1	204524710	204524996	+	AluSx	hg19|panTro5|gorGor3|ponAbe2|rheMac8	B0
chr1	204525543	204525826	+	AluJb	hg19|panTro5|gorGor3|ponAbe2|rheMac8	B0
chr1	20471288	20471601	+	AluSz	hg19|panTro5|gorGor3|ponAbe2|rheMac8	B0
chr1	205112263	205112512	-	AluSx1	hg19|panTro5|gorGor3|ponAbe2|rheMac8	B0
chr1	20511364	20511656	+	AluJb	hg19|panTro5|gorGor3|ponAbe2|rheMac8	B0
chr1	205198335	205198613	-	AluSx1	hg19|panTro5|gorGor3|ponAbe2|rheMac8	B0
chr1	205252263	205252573	+	AluSg	hg19|panTro5|gorGor3|ponAbe2|rheMac8	B0
chr1	205278455	205278753	-	AluSg	hg19|panTro5|gorGor3|ponAbe2|rheMac8	B0
chr1	205508764	205509072	+	AluSg	hg19|panTro5|gorGor3|ponAbe2|rheMac8	B0
chr1	205608456	205608762	-	AluSz6	hg19|panTro5|gorGor3|ponAbe2|rheMac8	B0
chr1	205612712	205613005	-	AluSq2	hg19|panTro5|gorGor3|ponAbe2|rheMac8	B0
chr1	205699607	205699910	-	AluSg	hg19|panTro5|gorGor3|ponAbe2|rheMac8	B0
chr1	205708599	205708881	-	AluJb	hg19|panTro5|gorGor3|ponAbe2|rheMac8	B0
chr1	205737653	205737961	-	AluSq2	hg19|panTro5|gorGor3|ponAbe2|rheMac8	B0
chr1	205893924	205894220	-	AluJr	hg19|panTro5|gorGor3|ponAbe2|rheMac8	B0
chr1	206100131	206100445	-	AluJo	hg19|panTro5|gorGor3|ponAbe2|rheMac8	B0
chr1	206482235	206482529	+	AluJr	hg19|panTro5|gorGor3|ponAbe2|rheMac8	B0
chr1	206500391	206500688	+	AluSp	hg19|panTro5|gorGor3|ponAbe2|rheMac8	B0
chr1	206519143	206519211	+	AluJo	hg19|panTro5|gorGor3|ponAbe2|rheMac8	B0
chr1	206520649	206520942	+	AluSx1	hg19|panTro5|gorGor3|ponAbe2|rheMac8	B0
chr1	206559883	206560180	+	AluY	hg19|panTro5|gorGor3|ponAbe2|rheMac8	B0
chr1	206582859	206583170	+	AluSx1	hg19|panTro5|gorGor3|ponAbe2|rheMac8	B0
chr1	206617253	206617541	+	AluSx	hg19|panTro5|gorGor3|ponAbe2|rheMac8	B0
chr1	206886030	206886307	+	AluSx1	hg19|panTro5|gorGor3|ponAbe2|rheMac8	B0
chr1	206886929	206887236	+	AluSz	hg19|panTro5|gorGor3|ponAbe2|rheMac8	B0
chr1	207087773	207088069	-	AluJb	hg19|panTro5|gorGor3|ponAbe2|rheMac8	B0
chr1	207778327	207778634	+	AluSz6	hg19|panTro5|gorGor3|ponAbe2|rheMac8	B0
chr1	207821305	207821519	+	AluJb	hg19|panTro5|gorGor3|ponAbe2|rheMac8	B0
chr1	207928255	207928516	+	AluJr	hg19|panTro5|gorGor3|ponAbe2|rheMac8	B0
chr1	207942322	207942612	+	AluSg4	hg19|panTro5|gorGor3|ponAbe2|rheMac8	B0
chr1	207965345	207965653	+	AluSz6	hg19|panTro5|gorGor3|ponAbe2|rheMac8	B0
chr1	208028791	208029073	-	AluSx	hg19|panTro5|gorGor3|ponAbe2|rheMac8	B0
chr1	208111172	208111481	-	AluSx3	hg19|panTro5|gorGor3|ponAbe2|rheMac8	B0
chr1	208286891	208287200	-	AluJb	hg19|panTro5|gorGor3|ponAbe2|rheMac8	B0
chr1	208302036	208302339	-	AluY	hg19|panTro5|gorGor3|ponAbe2|rheMac8	B0
chr1	208388363	208388640	-	AluJb	hg19|panTro5|gorGor3|ponAbe2|rheMac8	B0
chr1	209808728	209809046	-	AluSz	hg19|panTro5|gorGor3|ponAbe2|rheMac8	B0
chr1	209908996	209909283	+	AluSc	hg19|panTro5|gorGor3|ponAbe2|rheMac8	B0
chr1	209938236	209938515	+	AluSz6	hg19|panTro5|gorGor3|ponAbe2|rheMac8	B0
chr1	209939926	209940233	+	AluSz6	hg19|panTro5|gorGor3|ponAbe2|rheMac8	B0
chr1	209965127	209965429	-	AluJr	hg19|panTro5|gorGor3|ponAbe2|rheMac8	B0
chr12	10046770	10047080	-	AluJb	hg19|panTro5|gorGor3|ponAbe2|rheMac8	B0
chr12	100922045	100922162	+	AluSx	hg19|panTro5|gorGor3|ponAbe2|rheMac8	B0
chr12	100940192	100940502	+	AluSx3	hg19|panTro5|gorGor3|ponAbe2|rheMac8	B0
chr12	101020611	101020896	+	AluSg	hg19|panTro5|gorGor3|ponAbe2|rheMac8	B0
chr12	1011182	1011480	+	AluJr	hg19|panTro5|gorGor3|ponAbe2|rheMac8	B0
chr12	101525612	101525898	-	AluSq	hg19|panTro5|gorGor3|ponAbe2|rheMac8	B0
chr12	101623895	101624187	+	AluSz	hg19|panTro5|gorGor3|ponAbe2|rheMac8	B0
chr12	101883218	101883520	+	AluSz	hg19|panTro5|gorGor3|ponAbe2|rheMac8	B0
chr12	101997440	101997712	+	AluJb	hg19|panTro5|gorGor3|ponAbe2|rheMac8	B0
chr12	101999356	101999663	+	AluSq2	hg19|panTro5|gorGor3|ponAbe2|rheMac8	B0
chr12	101999691	101999982	+	AluJb	hg19|panTro5|gorGor3|ponAbe2|rheMac8	B0
chr12	102005574	102005879	+	AluSc	hg19|panTro5|gorGor3|ponAbe2|rheMac8	B0
chr12	102009667	102009781	-	AluJo	hg19|panTro5|gorGor3|ponAbe2|rheMac8	B0
chr12	102016230	102016520	+	AluSz	hg19|panTro5|gorGor3|ponAbe2|rheMac8	B0
chr12	102016831	102017134	+	AluSx1	hg19|panTro5|gorGor3|ponAbe2|rheMac8	B0
chr12	102019582	102019890	+	AluSq2	hg19|panTro5|gorGor3|ponAbe2|rheMac8	B0
chr12	102034640	102034915	+	AluSz	hg19|panTro5|gorGor3|ponAbe2|rheMac8	B0
chr12	102047699	102047991	+	AluSz6	hg19|panTro5|gorGor3|ponAbe2|rheMac8	B0
chr12	102070251	102070544	+	AluJo	hg19|panTro5|gorGor3|ponAbe2|rheMac8	B0
chr12	102076925	102077225	+	AluJb	hg19|panTro5|gorGor3|ponAbe2|rheMac8	B0
chr12	102082456	102082761	+	AluSz6	hg19|panTro5|gorGor3|ponAbe2|rheMac8	B0
chr12	102116349	102116482	+	AluJb	hg19|panTro5|gorGor3|ponAbe2|rheMac8	B0
chr12	102121745	102122041	+	AluSz	hg19|panTro5|gorGor3|ponAbe2|rheMac8	B0
chr12	102131919	102132231	+	AluSq2	hg19|panTro5|gorGor3|ponAbe2|rheMac8	B0
chr12	102132232	102132515	+	AluSx1	hg19|panTro5|gorGor3|ponAbe2|rheMac8	B0
chr12	102133479	102133777	+	AluSx1	hg19|panTro5|gorGor3|ponAbe2|rheMac8	B0
chr12	102137487	102137789	+	AluJb	hg19|panTro5|gorGor3|ponAbe2|rheMac8	B0
chr12	102297560	102297661	+	AluJo	hg19|panTro5|gorGor3|ponAbe2|rheMac8	B0
chr12	102316593	102316898	+	AluJb	hg19|panTro5|gorGor3|ponAbe2|rheMac8	B0
chr12	102412249	102412546	-	AluJr4	hg19|panTro5|gorGor3|ponAbe2|rheMac8	B0
chr12	102835715	102836025	-	AluJb	hg19|panTro5|gorGor3|ponAbe2|rheMac8	B0
chr1	210339628	210339906	+	AluJb	hg19|panTro5|gorGor3|ponAbe2|rheMac8	B0
chr12	10364555	10364841	-	AluSp	hg19|panTro5|gorGor3|ponAbe2|rheMac8	B0
chr12	104233026	104233317	-	AluJb	hg19|panTro5|gorGor3|ponAbe2|rheMac8	B0
chr12	104357918	104358195	-	AluSx1	hg19|panTro5|gorGor3|ponAbe2|rheMac8	B0
chr12	104365059	104365365	+	AluSg	hg19|panTro5|gorGor3|ponAbe2|rheMac8	B0
chr12	104692221	104692526	+	AluSg	hg19|panTro5|gorGor3|ponAbe2|rheMac8	B0
chr12	104886531	104886825	+	AluSg	hg19|panTro5|gorGor3|ponAbe2|rheMac8	B0
chr12	104911797	104912087	+	AluJo	hg19|panTro5|gorGor3|ponAbe2|rheMac8	B0
chr12	104937625	104937961	+	AluJr	hg19|panTro5|gorGor3|ponAbe2|rheMac8	B0
chr12	105207411	105207713	-	AluSx	hg19|panTro5|gorGor3|ponAbe2|rheMac8	B0
chr12	105224842	105225009	-	AluJb	hg19|panTro5|gorGor3|ponAbe2|rheMac8	B0
chr12	105398066	105398355	+	AluSg	hg19|panTro5|gorGor3|ponAbe2|rheMac8	B0
chr12	10548846	10549106	+	AluSz	hg19|panTro5|gorGor3|ponAbe2|rheMac8	B0
chr12	105541406	105541706	+	AluSp	hg19|panTro5|gorGor3|ponAbe2|rheMac8	B0
chr12	105549334	105549633	+	AluSx1	hg19|panTro5|gorGor3|ponAbe2|rheMac8	B0
chr12	105582792	105583107	-	AluSx1	hg19|panTro5|gorGor3|ponAbe2|rheMac8	B0
chr12	105589550	105589862	+	AluJb	hg19|panTro5|gorGor3|ponAbe2|rheMac8	B0
chr12	105590203	105590518	-	AluSp	hg19|panTro5|gorGor3|ponAbe2|rheMac8	B0
chr12	105594702	105594986	-	AluSz	hg19|panTro5|gorGor3|ponAbe2|rheMac8	B0
chr12	106719388	106719691	+	AluSx1	hg19|panTro5|gorGor3|ponAbe2|rheMac8	B0
chr12	107248288	107248582	+	AluSc5	hg19|panTro5|gorGor3|ponAbe2|rheMac8	B0
chr12	107362084	107362170	+	AluSx	hg19|panTro5|gorGor3|ponAbe2|rheMac8	B0
chr12	107441865	107442157	-	AluSx3	hg19|panTro5|gorGor3|ponAbe2|rheMac8	B0
chr12	107443153	107443453	-	AluSz	hg19|panTro5|gorGor3|ponAbe2|rheMac8	B0
chr12	107462083	107462375	-	AluSz	hg19|panTro5|gorGor3|ponAbe2|rheMac8	B0
chr12	107483855	107484154	-	AluSz6	hg19|panTro5|gorGor3|ponAbe2|rheMac8	B0
chr12	107718160	107718244	+	AluJr	hg19|panTro5|gorGor3|ponAbe2|rheMac8	B0
chr12	108141574	108141767	-	AluJb	hg19|panTro5|gorGor3|ponAbe2|rheMac8	B0
chr12	10825006	10825132	-	AluSx	hg19|panTro5|gorGor3|ponAbe2|rheMac8	B0
chr12	10857690	10857984	-	AluSc	hg19|panTro5|gorGor3|ponAbe2|rheMac8	B0
chr12	109051999	109052121	-	AluSz	hg19|panTro5|gorGor3|ponAbe2|rheMac8	B0
chr1	21090843	21091009	-	AluSq2	hg19|panTro5|gorGor3|ponAbe2|rheMac8	B0
chr12	109178893	109179197	-	AluSq	hg19|panTro5|gorGor3|ponAbe2|rheMac8	B0
chr12	109212538	109212830	-	AluSx1	hg19|panTro5|gorGor3|ponAbe2|rheMac8	B0
chr12	109594054	109594343	+	AluJo	hg19|panTro5|gorGor3|ponAbe2|rheMac8	B0
chr12	109651777	109652082	+	AluJr	hg19|panTro5|gorGor3|ponAbe2|rheMac8	B0
chr12	109682723	109682993	+	AluSp	hg19|panTro5|gorGor3|ponAbe2|rheMac8	B0
chr12	109684602	109684903	+	AluJr	hg19|panTro5|gorGor3|ponAbe2|rheMac8	B0
chr12	109697096	109697398	+	AluJr	hg19|panTro5|gorGor3|ponAbe2|rheMac8	B0
chr12	110276538	110276845	+	AluSg	hg19|panTro5|gorGor3|ponAbe2|rheMac8	B0
chr12	110289399	110289655	-	AluSq	hg19|panTro5|gorGor3|ponAbe2|rheMac8	B0
chr12	110289655	110289953	-	AluSq2	hg19|panTro5|gorGor3|ponAbe2|rheMac8	B0
chr12	110297791	110298082	-	AluSp	hg19|panTro5|gorGor3|ponAbe2|rheMac8	B0
chr12	110298301	110298445	-	AluJr	hg19|panTro5|gorGor3|ponAbe2|rheMac8	B0
chr12	110302642	110302816	-	AluSz6	hg19|panTro5|gorGor3|ponAbe2|rheMac8	B0
chr12	110303420	110303539	-	AluSz6	hg19|panTro5|gorGor3|ponAbe2|rheMac8	B0
chr12	110304948	110305253	-	AluSx3	hg19|panTro5|gorGor3|ponAbe2|rheMac8	B0
chr12	110305489	110305570	-	AluJb	hg19|panTro5|gorGor3|ponAbe2|rheMac8	B0
chr12	110305570	110305881	-	AluY	hg19|panTro5|gorGor3|ponAbe2|rheMac8	B0
chr12	110307258	110307569	-	AluSc5	hg19|panTro5|gorGor3|ponAbe2|rheMac8	B0
chr12	110308883	110309189	-	AluSx3	hg19|panTro5|gorGor3|ponAbe2|rheMac8	B0
chr12	110312574	110312867	-	AluSx	hg19|panTro5|gorGor3|ponAbe2|rheMac8	B0
chr12	110314652	110314953	-	AluJb	hg19|panTro5|gorGor3|ponAbe2|rheMac8	B0
chr12	110379627	110379929	-	AluJb	hg19|panTro5|gorGor3|ponAbe2|rheMac8	B0
chr12	110455456	110455750	+	AluSx1	hg19|panTro5|gorGor3|ponAbe2|rheMac8	B0
chr12	110505734	110506010	+	AluSp	hg19|panTro5|gorGor3|ponAbe2|rheMac8	B0
chr12	110747425	110747733	+	AluJb	hg19|panTro5|gorGor3|ponAbe2|rheMac8	B0
chr12	110749708	110749975	+	AluJb	hg19|panTro5|gorGor3|ponAbe2|rheMac8	B0
chr12	110834318	110834619	-	AluSz	hg19|panTro5|gorGor3|ponAbe2|rheMac8	B0
chr12	110885691	110885984	-	AluJo	hg19|panTro5|gorGor3|ponAbe2|rheMac8	B0
chr12	110948561	110948785	+	AluJo	hg19|panTro5|gorGor3|ponAbe2|rheMac8	B0
chr1	21110472	21110762	-	AluJb	hg19|panTro5|gorGor3|ponAbe2|rheMac8	B0
chr12	111136651	111136953	+	AluSz6	hg19|panTro5|gorGor3|ponAbe2|rheMac8	B0
chr12	11145003	11145311	-	AluJr	hg19|panTro5|gorGor3|ponAbe2|rheMac8	B0
chr12	11158965	11159168	-	AluJo	hg19|panTro5|gorGor3|ponAbe2|rheMac8	B0
chr12	11165164	11165451	-	AluJo	hg19|panTro5|gorGor3|ponAbe2|rheMac8	B0
chr12	111878818	111878906	+	AluJo	hg19|panTro5|gorGor3|ponAbe2|rheMac8	B0
chr12	111878932	111879182	+	AluJo	hg19|panTro5|gorGor3|ponAbe2|rheMac8	B0
chr12	111887730	111888026	-	AluSq2	hg19|panTro5|gorGor3|ponAbe2|rheMac8	B0
chr12	111915560	111915897	-	AluJb	hg19|panTro5|gorGor3|ponAbe2|rheMac8	B0
chr12	111922549	111922831	-	AluJo	hg19|panTro5|gorGor3|ponAbe2|rheMac8	B0
chr12	111952328	111952590	-	AluSz	hg19|panTro5|gorGor3|ponAbe2|rheMac8	B0
chr12	111980041	111980275	-	AluSx1	hg19|panTro5|gorGor3|ponAbe2|rheMac8	B0
chr12	112028698	112028992	-	AluY	hg19|panTro5|gorGor3|ponAbe2|rheMac8	B0
chr12	112032146	112032289	-	AluSx	hg19|panTro5|gorGor3|ponAbe2|rheMac8	B0
chr12	112112054	112112345	-	AluSx	hg19|panTro5|gorGor3|ponAbe2|rheMac8	B0
chr12	112208917	112209183	+	AluJo	hg19|panTro5|gorGor3|ponAbe2|rheMac8	B0
chr12	112227122	112227325	+	AluSg7	hg19|panTro5|gorGor3|ponAbe2|rheMac8	B0
chr12	112229551	112229718	+	AluJb	hg19|panTro5|gorGor3|ponAbe2|rheMac8	B0
chr12	112373465	112373742	-	AluSz6	hg19|panTro5|gorGor3|ponAbe2|rheMac8	B0
chr12	11259628	11259898	-	AluJr	hg19|panTro5|gorGor3|ponAbe2|rheMac8	B0
chr12	112661214	112661523	-	AluSz	hg19|panTro5|gorGor3|ponAbe2|rheMac8	B0
chr12	112671018	112671324	-	AluJo	hg19|panTro5|gorGor3|ponAbe2|rheMac8	B0
chr12	112761932	112762222	-	AluJo	hg19|panTro5|gorGor3|ponAbe2|rheMac8	B0
chr12	11277447	11277740	-	AluSq2	hg19|panTro5|gorGor3|ponAbe2|rheMac8	B0
chr12	112794263	112794536	-	AluJb	hg19|panTro5|gorGor3|ponAbe2|rheMac8	B0
[truncated: 11,964 more rows]
