# Supplementary material for: Genome-wide analysis of polymerase III–transcribed Alu elements suggests cell-type–specific enhancer function
Source: HighWire-hosted journal article supplement (doi:10.1101/gr.249789.119), 2019-08-14
Supplement: Supplemental_Table_S5.xlsx [file Supplemental_Table_S5.xlsx]

## Sheet: Table Legend
Supplemental Table S5. Gene Ontology analysis results of protein-coding genes near expressed Alu elements.

## Sheet: GREAT_Brain
Ontology	Term Name	Binom Rank	Binom Raw P-Value	Binom FDR Q-Val	Binom Fold Enrichment	Binom Observed Region Hits	Binom Region Set Coverage	Hyper Rank	Hyper FDR Q-Val	Hyper Fold Enrichment	Hyper Observed Gene Hits	Hyper Total Genes	Hyper Gene Set Coverage
GO Biological Process	axon choice point recognition	3	5.29318e-17	1.84203e-13	12.1723	22	0.0336907	60	0.0113836	15.0718	4	7	0.00584795
GO Biological Process	neuron development	5	1.65296e-16	3.45138e-13	2.00194	148	0.226646	6	2.78884e-10	2.59015	71	723	0.103801
GO Biological Process	neuromuscular process	6	1.92934e-16	3.35706e-13	4.70472	43	0.0658499	46	0.00233975	3.97054	14	93	0.0204678
GO Biological Process	neuromuscular process controlling balance	7	4.929e-16	7.35125e-13	6.3536	32	0.0490046	74	0.0215257	4.4789	9	53	0.0131579
GO Biological Process	synapse organization	10	8.16795e-15	8.52734e-12	3.89037	47	0.0719755	39	0.00016679	4.15174	17	108	0.0248538
GO Biological Process	neuron projection development	12	2.30147e-14	2.00228e-11	2.0338	125	0.191424	5	3.27088e-10	2.78804	63	596	0.0921053
GO Biological Process	synaptic transmission	13	3.21535e-14	2.58217e-11	2.11516	114	0.174579	21	1.16674e-06	2.42693	53	576	0.0774854
GO Biological Process	transmission of nerve impulse	15	5.08203e-14	3.53709e-11	2.02619	123	0.188361	20	1.17453e-06	2.31787	58	660	0.0847953
GO Biological Process	forebrain development	18	1.08448e-13	6.29001e-11	2.38579	87	0.133231	26	2.06675e-06	3.03668	35	304	0.0511696
GO Biological Process	regulation of cell projection organization	20	1.38268e-13	7.21761e-11	2.5668	76	0.116386	40	0.000187675	2.71915	30	291	0.0438597
GO Biological Process	neuron recognition	23	4.83967e-13	2.19679e-10	4.90795	32	0.0490046	68	0.0159193	6.15434	7	30	0.0102339
GO Biological Process	brain development	24	5.57314e-13	2.42432e-10	2.00853	116	0.177642	27	3.46206e-05	2.30849	47	537	0.0687134
GO Biological Process	regulation of negative chemotaxis	25	6.33371e-13	2.64496e-10	11.2519	17	0.0260337	79	0.0278747	19.7818	3	4	0.00438597
GO Biological Process	regulation of nervous system development	26	6.46576e-13	2.59625e-10	2.0534	110	0.168453	17	2.28682e-07	2.6758	49	483	0.0716374
GO Biological Process	axon development	29	1.85166e-12	6.66598e-10	2.05336	106	0.162328	10	1.15226e-09	2.98063	53	469	0.0774854
GO Biological Process	cell morphogenesis involved in neuron differentiation	33	6.48326e-12	2.05107e-09	2.01045	106	0.162328	3	3.16386e-10	3.05174	56	484	0.0818713
GO Biological Process	axonogenesis	35	1.04336e-11	3.11219e-09	2.02885	102	0.156202	9	1.25229e-09	3.02101	52	454	0.0760234
GO Biological Process	regulation of neuron differentiation	43	4.38729e-11	1.06519e-08	2.10341	89	0.136294	19	1.22701e-06	2.91403	39	353	0.0570175
GO Biological Process	central nervous system neuron differentiation	49	3.11402e-10	6.63478e-08	2.58658	55	0.0842267	44	0.000451114	3.3815	20	156	0.0292398
GO Biological Process	regulation of neuron projection development	51	5.08511e-10	1.04095e-07	2.42863	60	0.0918836	42	0.000239208	2.93064	26	234	0.0380117
GO Cellular Component	axon	1	1.83074e-21	2.31588e-18	3.12495	91	0.139357	4	1.58852e-07	3.38406	34	265	0.0497076
GO Cellular Component	neuron projection	3	2.87514e-14	1.21235e-11	2.00525	128	0.196018	2	1.90568e-09	2.58506	64	653	0.0935673
GO Cellular Component	cell projection part	5	1.12349e-13	2.84242e-11	2.13996	107	0.163859	9	2.72638e-06	2.26078	54	630	0.0789474
GO Cellular Component	axon part	6	2.49761e-13	5.2658e-11	3.65887	45	0.0689127	22	0.0391692	2.83376	13	121	0.0190059
GO Cellular Component	growth cone	9	8.03004e-11	1.12867e-08	3.40519	39	0.0597244	7	1.23758e-06	4.96177	19	101	0.0277778
GO Cellular Component	site of polarized growth	11	1.16635e-10	1.3413e-08	3.36064	39	0.0597244	8	2.11473e-06	4.77275	19	105	0.0277778
GO Cellular Component	synaptic membrane	14	8.47238e-08	7.6554e-06	2.08752	61	0.093415	6	1.07761e-06	3.4768	29	220	0.0423977
GO Cellular Component	cell leading edge	17	4.24167e-07	3.1563e-05	2.19298	49	0.0750383	16	0.00324263	2.38114	26	288	0.0380117
GO Cellular Component	dendritic spine	26	4.71679e-05	0.0022949	2.4723	25	0.0382848	13	6.13313e-05	4.65454	15	85	0.0219298
GO Cellular Component	postsynaptic density	27	6.63983e-05	0.00311088	2.24393	29	0.0444104	15	0.00144603	3.59669	15	110	0.0219298
GO Cellular Component	spindle microtubule	32	0.000263287	0.010408	4.00669	10	0.0153139	20	0.0161193	4.68902	8	45	0.0116959
GO Cellular Component	growth cone membrane	33	0.000391735	0.0150165	5.39239	7	0.0107198	17	0.00486823	15.0718	4	7	0.00584795

## Sheet: GREAT_Heart
Ontology	Term Name	Binom Rank	Binom Raw P-Value	Binom FDR Q-Val	Binom Fold Enrichment	Binom Observed Region Hits	Binom Region Set Coverage	Hyper Rank	Hyper FDR Q-Val	Hyper Fold Enrichment	Hyper Observed Gene Hits	Hyper Total Genes	Hyper Gene Set Coverage
GO Molecular Function	structural constituent of muscle	17	3.57904e-25	7.7644e-23	28.5905	22	0.128655	1	1.15393e-06	21.2636	9	46	0.0542169
GO Molecular Function	cytoskeletal protein binding	29	3.39408e-18	4.31633e-16	4.10694	50	0.292398	2	0.000721212	3.46017	22	691	0.13253
GO Biological Process	cell communication by electrical coupling involved in cardiac conduction	1	8.20631e-72	8.56739e-68	148.526	39	0.22807	41	0.00663597	46.5774	3	7	0.0180723
GO Biological Process	cell communication by electrical coupling	3	4.8834e-68	1.69942e-64	118.704	39	0.22807	48	0.0134203	36.2269	3	9	0.0180723
GO Biological Process	regulation of striated muscle contraction	5	1.29097e-57	2.69556e-54	26.3229	52	0.304094	51	0.0145702	8.58006	6	76	0.0361446
GO Biological Process	cardiac muscle contraction	7	4.3684e-57	6.51516e-54	52.2341	41	0.239766	44	0.00844596	13.2538	5	41	0.0301205
GO Biological Process	heart contraction	9	5.54518e-56	6.4324e-53	45.4075	42	0.245614	36	0.00143269	13.5851	6	48	0.0361446
GO Biological Process	heart development	12	4.14652e-55	3.60747e-52	8.11255	84	0.491228	3	3.31483e-06	5.39358	20	403	0.120482
GO Biological Process	regulation of release of sequestered calcium ion into cytosol by sarcoplasmic reticulum	14	9.10748e-54	6.79157e-51	46.7164	40	0.233918	49	0.0135556	18.1135	4	24	0.0240964
GO Biological Process	calcium ion transport into cytosol	15	6.09762e-53	4.24395e-50	41.2293	41	0.239766	43	0.00764496	13.5851	5	40	0.0301205
GO Biological Process	heart process	16	9.43161e-53	6.15413e-50	37.9146	42	0.245614	38	0.00194706	12.786	6	51	0.0361446
GO Biological Process	cytosolic calcium ion transport	17	2.48712e-52	1.52738e-49	39.8139	41	0.239766	44	0.00844596	13.2538	5	41	0.0301205
GO Biological Process	striated muscle contraction	18	2.73571e-52	1.58671e-49	36.9464	42	0.245614	35	0.000887638	11.1877	7	68	0.0421687
GO Biological Process	regulation of muscle contraction	20	1.64314e-48	8.57721e-46	16.6009	53	0.309941	60	0.0403213	5.72004	7	133	0.0421687
GO Biological Process	cardiac muscle tissue development	23	1.33342e-46	6.05256e-44	14.6058	54	0.31579	1	1.8068e-07	11.6147	14	131	0.0843374
GO Biological Process	muscle contraction	24	1.55915e-46	6.78232e-44	13.9911	55	0.321637	4	1.43319e-05	7.53233	14	202	0.0843374
GO Biological Process	regulation of heart contraction	25	2.46741e-46	1.03039e-43	14.4322	54	0.31579	37	0.00149227	7.08787	9	138	0.0542169
GO Biological Process	muscle system process	32	3.21013e-44	1.0473e-41	11.7433	57	0.333333	2	4.4103e-06	7.1855	16	242	0.0963855
GO Biological Process	cardiovascular system development	39	2.33994e-40	6.26385e-38	4.86903	88	0.51462	23	9.54169e-05	3.45734	23	723	0.138554
GO Biological Process	heart morphogenesis	49	4.27842e-37	9.11566e-35	9.82244	53	0.309941	6	3.99587e-05	7.43605	13	190	0.0783133
GO Biological Process	striated muscle tissue development	52	1.00096e-35	2.00961e-33	8.91289	54	0.31579	13	4.13612e-05	6.3134	14	241	0.0843374
GO Biological Process	muscle tissue development	54	2.30323e-35	4.45291e-33	8.49141	55	0.321637	5	2.67106e-05	6.44352	15	253	0.0903614
GO Cellular Component	sarcomere	1	9.1009e-75	1.15126e-71	22.0029	71	0.415205	1	2.23649e-10	11.2657	17	164	0.10241
GO Cellular Component	contractile fiber part	2	1.14596e-72	7.24823e-70	20.5144	71	0.415205	2	4.73908e-10	10.3216	17	179	0.10241
GO Cellular Component	myofibril	3	7.21882e-72	3.04394e-69	19.974	71	0.415205	3	7.67962e-10	9.77552	17	189	0.10241
GO Cellular Component	contractile fiber	4	2.28573e-70	7.22863e-68	18.9964	71	0.415205	5	1.06316e-09	9.28428	17	199	0.10241
GO Cellular Component	I band	5	1.24391e-69	3.1471e-67	25.4767	63	0.368421	4	7.07052e-10	13.4649	14	113	0.0843374
GO Cellular Component	Z disc	6	1.69489e-69	3.57338e-67	26.5069	62	0.362573	6	1.21491e-09	14.4168	13	98	0.0783133
GO Cellular Component	junctional sarcoplasmic reticulum membrane	7	3.94731e-34	7.13336e-32	74.3338	22	0.128655	13	0.00851935	32.6042	3	10	0.0180723
GO Cellular Component	actin cytoskeleton	19	2.46455e-16	1.64087e-14	5.46935	35	0.204678	9	0.000633092	4.07553	15	400	0.0903614
GO Cellular Component	A band	21	6.96794e-16	4.19735e-14	26.0652	14	0.0818713	10	0.000650412	19.4073	5	28	0.0301205
GO Cellular Component	M band	22	9.82352e-15	5.64852e-13	31.4027	12	0.0701754	23	0.0310175	18.1135	3	18	0.0180723
GO Cellular Component	muscle myosin complex	25	1.7405e-13	8.80695e-12	54.5859	9	0.0526316	7	8.72641e-05	30.1891	5	18	0.0301205
GO Cellular Component	cytoskeleton	26	3.42473e-13	1.66626e-11	2.36505	70	0.409357	15	0.0169932	1.90668	33	1881	0.198795
GO Cellular Component	striated muscle myosin thick filament	28	3.47372e-12	1.56938e-10	87.3616	7	0.0409357	17	0.0186731	72.4538	2	3	0.0120482
GO Cellular Component	myofilament	29	3.60539e-12	1.5727e-10	38.7304	9	0.0526316	12	0.00314715	21.7361	4	20	0.0240964
GO Cellular Component	myosin II complex	30	8.02527e-12	3.38399e-10	35.3615	9	0.0526316	8	0.000362234	22.6418	5	24	0.0301205
GO Cellular Component	myosin filament	33	2.27658e-10	8.7269e-09	32.5399	8	0.0467836	11	0.00219975	24.1513	4	18	0.0240964
GO Cellular Component	myosin complex	53	9.9977e-07	2.38624e-05	8.9436	9	0.0526316	20	0.0223129	8.23339	5	66	0.0301205
GO Cellular Component	focal adhesion	56	1.97895e-06	4.4703e-05	5.63182	12	0.0701754	16	0.0166903	5.80737	7	131	0.0421687
GO Cellular Component	cell-substrate adherens junction	58	2.47736e-06	5.4032e-05	5.50859	12	0.0701754	18	0.0178474	5.6353	7	135	0.0421687
GO Cellular Component	cell-substrate junction	59	9.00449e-06	0.000193062	4.84207	12	0.0701754	19	0.0230114	5.3575	7	142	0.0421687

## Sheet: GREAT_Liver
Ontology	Term Name	Binom Rank	Binom Raw P-Value	Binom FDR Q-Val	Binom Fold Enrichment	Binom Observed Region Hits	Binom Region Set Coverage	Hyper Rank	Hyper FDR Q-Val	Hyper Fold Enrichment	Hyper Observed Gene Hits	Hyper Total Genes	Hyper Gene Set Coverage
GO Molecular Function	oxidoreductase activity, acting on paired donors, with incorporation or reduction of molecular oxygen, reduced flavin or flavoprotein as one donor, and incorporation of one atom of oxygen	13	6.98005e-05	0.0198019	12.0936	5	0.0139276	3	0.0138029	8.54734	7	25	0.0118443
GO Molecular Function	iron ion binding	19	0.000225749	0.043819	3.1076	14	0.0389972	2	0.0106421	3.41287	18	161	0.0304569
GO Biological Process	carboxylic acid metabolic process	12	9.75478e-12	8.48666e-09	2.59648	61	0.169916	1	0.000958721	2.12093	56	806	0.0947546
GO Biological Process	organic acid metabolic process	17	2.35464e-09	1.44603e-06	2.18248	65	0.181059	2	0.00243241	1.961	60	934	0.101523
GO Biological Process	oxoacid metabolic process	19	3.37269e-09	1.85321e-06	2.17964	64	0.178273	4	0.0032613	1.92867	58	918	0.0981387
GO Biological Process	monocarboxylic acid metabolic process	30	3.66387e-07	0.000127503	2.64676	34	0.0947075	11	0.0185249	2.27479	31	416	0.0524535
GO Biological Process	cellular amino acid metabolic process	34	7.26639e-07	0.000223121	2.66217	32	0.0891365	9	0.0187558	2.29688	31	412	0.0524535
GO Biological Process	nitric oxide biosynthetic process	41	6.92041e-06	0.00176217	13.5503	6	0.0167131	15	0.0267045	11.7409	5	13	0.00846024
GO Biological Process	alpha-amino acid metabolic process	44	9.97212e-06	0.00236611	3.12678	20	0.0557103	5	0.0113875	3.06723	21	209	0.035533
GO Biological Process	small molecule catabolic process	50	3.77265e-05	0.00787729	2.75555	21	0.0584958	14	0.0272648	2.63363	22	255	0.037225
GO Biological Process	carboxylic acid catabolic process	53	5.48791e-05	0.0108101	2.96228	18	0.0501393	6	0.0125386	3.11492	20	196	0.033841
GO Cellular Component	spectrin-associated cytoskeleton	1	1.90248e-22	2.40663e-19	51.5637	16	0.0445682	1	4.03673e-05	22.8947	6	8	0.0101523

## Sheet: GREAT_Lung
Ontology	Term Name	Binom Rank	Binom Raw P-Value	Binom FDR Q-Val	Binom Fold Enrichment	Binom Observed Region Hits	Binom Region Set Coverage	Hyper Rank	Hyper FDR Q-Val	Hyper Fold Enrichment	Hyper Observed Gene Hits	Hyper Total Genes	Hyper Gene Set Coverage
GO Cellular Component	alveolar lamellar body	13	1.79893e-06	0.000175049	48.2647	4	0.0155642	1	0.0106049	25.392	4	7	0.00985222
GO Cellular Component	endosomal part	17	7.61584e-06	0.000566708	2.86757	23	0.0894942	14	0.0245894	2.48319	19	340	0.046798
GO Cellular Component	lamellar body	18	7.93438e-06	0.000557611	33.0563	4	0.0155642	6	0.0155113	16.1585	4	11	0.00985222
GO Cellular Component	alveolar lamellar body membrane	31	0.000344621	0.0140628	75.3685	2	0.0077821	15	0.0426072	44.436	2	2	0.00492611

## Sheet: GREAT_Spleen
Ontology	Term Name	Binom Rank	Binom Raw P-Value	Binom FDR Q-Val	Binom Fold Enrichment	Binom Observed Region Hits	Binom Region Set Coverage	Hyper Rank	Hyper FDR Q-Val	Hyper Fold Enrichment	Hyper Observed Gene Hits	Hyper Total Genes	Hyper Gene Set Coverage
GO Biological Process	lipopolysaccharide metabolic process	1	1.0446e-13	1.09056e-09	42.2509	10	0.0369004	18	0.0235584	18.1408	4	9	0.00904977
GO Biological Process	immune system process	2	4.83869e-12	2.5258e-08	2.08959	87	0.321033	2	0.000383305	1.82523	80	1789	0.180996
GO Biological Process	activation of immune response	3	4.78843e-10	1.66637e-06	3.73321	31	0.114391	14	0.0228118	2.67252	22	336	0.0497738
GO Biological Process	immune response-activating cell surface receptor signaling pathway	4	5.7288e-10	1.49522e-06	4.93726	23	0.0848708	11	0.0245768	3.51869	15	174	0.0339366
GO Biological Process	regulation of defense response	7	9.93658e-10	1.48197e-06	3.27865	35	0.129151	7	0.0192684	2.45251	28	466	0.0633484
GO Biological Process	immune effector process	8	1.03466e-09	1.35023e-06	3.82827	29	0.107011	28	0.0349382	2.41955	23	388	0.0520362
GO Biological Process	immune response-activating signal transduction	9	1.04299e-09	1.20987e-06	3.82689	29	0.107011	13	0.0233739	2.84437	20	287	0.0452489
GO Biological Process	positive regulation of immune response	10	1.08237e-09	1.13e-06	3.34325	34	0.125461	19	0.0240704	2.42957	25	420	0.0565611
GO Biological Process	immune response	11	1.43028e-09	1.35746e-06	2.35822	56	0.206642	6	0.0194014	1.87536	51	1110	0.115385
GO Biological Process	regulation of immune response	12	2.04915e-09	1.78276e-06	2.66948	45	0.166052	4	0.00399346	2.28059	39	698	0.0882353
GO Biological Process	endocytosis	13	3.28615e-09	2.63904e-06	3.35194	32	0.118081	5	0.00730799	2.81884	25	362	0.0565611
GO Biological Process	phagocytosis	14	5.2273e-09	3.89807e-06	5.35675	19	0.0701107	17	0.0233802	3.81739	13	139	0.0294118
GO Biological Process	lipopolysaccharide-mediated signaling pathway	16	7.45653e-09	4.86539e-06	13.2045	10	0.0369004	22	0.0291948	8.44484	6	29	0.0135747
GO Biological Process	regulation of immune system process	18	1.22675e-08	7.11517e-06	2.15813	59	0.217712	3	0.0010937	2.06764	54	1066	0.122172
GO Biological Process	cell activation	19	1.29678e-08	7.12549e-06	2.62025	42	0.154981	23	0.0305135	2.16343	30	566	0.0678733
GO Biological Process	regulation of immune effector process	23	4.31701e-08	1.95955e-05	4.06114	22	0.0811808	20	0.0260753	2.9271	18	251	0.040724
GO Biological Process	innate immune response	24	5.42091e-08	2.35809e-05	2.52487	41	0.151291	12	0.0225736	2.06596	37	731	0.0837104
GO Biological Process	positive regulation of immune system process	26	6.97796e-08	2.80192e-05	2.53873	40	0.147601	29	0.0373053	2.08112	31	608	0.0701357
GO Biological Process	vesicle-mediated transport	28	9.57877e-08	3.57151e-05	2.21273	50	0.184502	9	0.0203195	1.97205	43	890	0.0972851
GO Biological Process	T cell proliferation	35	2.87524e-07	8.57645e-05	8.87387	10	0.0369004	8	0.0200045	8.40345	7	34	0.0158371
