# Supplementary material for: Genome-wide analysis of polymerase III–transcribed Alu elements suggests cell-type–specific enhancer function
Source: HighWire-hosted journal article supplement (doi:10.1101/gr.249789.119), 2019-08-14
Supplement: Supplemental_Table_S6.xlsx [file Supplemental_Table_S6.xlsx]

## Sheet: Table Legend
Supplemental Table S6. Enriched TF motifs at expressed Alu elements.

## Sheet: Brain
Rank	Motif DB	Motif ID	TF	Consensus	P-value	Adjusted P-value	E-value
1	JASPAR2018_CORE_vertebrates_non-redundant.meme	MA1125.1	ZNF384	DNWMAAAAAAAA	7.72e-147	9.27e-144	5.37e-141
2	JASPAR2018_CORE_vertebrates_non-redundant.meme	MA0719.1	RHOXF1	NTRATCCN	2.07e-82	2.42e-79	1.4e-76
3	JASPAR2018_CORE_vertebrates_non-redundant.meme	MA0478.1	FOSL2	KRRTGASTCAB	1.1e-71	4.41e-69	2.55e-66
4	JASPAR2018_CORE_vertebrates_non-redundant.meme	MA0146.2	Zfx	SSSGCCBVGGCCTS	2.89e-71	1.93e-68	1.12e-65
5	JASPAR2018_CORE_vertebrates_non-redundant.meme	MA0682.1	Pitx1	YTAATCCH	1.74e-66	1.41e-63	8.19e-61
6	JASPAR2018_CORE_vertebrates_non-redundant.meme	MA0497.1	MEF2C	DDDCYAAAAATAGMW	5.25e-63	3.36e-60	1.94e-57
7	JASPAR2018_CORE_vertebrates_non-redundant.meme	MA0814.1	TFAP2C(var.2)	HGCCTSAGGCD	4.32e-60	2.94e-57	1.7e-54
8	JASPAR2018_CORE_vertebrates_non-redundant.meme	MA0017.2	NR2F1	CARAGGTCAMVNG	3.57e-58	2.06e-55	1.19e-52
9	JASPAR2018_CORE_vertebrates_non-redundant.meme	MA0801.1	MGA	AGGTGTGA	5.01e-57	3.01e-54	1.74e-51
10	JASPAR2018_CORE_vertebrates_non-redundant.meme	MA0019.1	Ddit3::Cebpa	VNRTGCAATMCC	1.98e-54	1.27e-51	7.36e-49
11	JASPAR2018_CORE_vertebrates_non-redundant.meme	MA0830.1	TCF4	HRCACCTGBN	4.05e-50	3.25e-47	1.88e-44
12	JASPAR2018_CORE_vertebrates_non-redundant.meme	MA0824.1	ID4	NRCACCTGBH	5.31e-49	3.81e-46	2.21e-43
13	JASPAR2018_CORE_vertebrates_non-redundant.meme	MA0516.1	SP2	GYCCCGCCYCYBSSS	4.31e-45	2.73e-42	1.58e-39
14	JASPAR2018_CORE_vertebrates_non-redundant.meme	MA0041.1	Foxd3	GWWTGTTTDTTT	5.15e-42	4.13e-39	2.39e-36
15	JASPAR2018_CORE_vertebrates_non-redundant.meme	MA0528.1	ZNF263	GGAGGAGGRRGRGGRGGRRGR	9.93e-42	8.34e-39	4.83e-36
16	JASPAR2018_CORE_vertebrates_non-redundant.meme	MA0728.1	Nr2f6(var.2)	RAGGTCAARAGGTCA	1.19e-40	1.25e-38	7.22e-36
17	JASPAR2018_CORE_vertebrates_non-redundant.meme	MA0522.2	TCF3	HRCACCTGBN	1.79e-41	1.52e-38	8.81e-36
18	JASPAR2018_CORE_vertebrates_non-redundant.meme	MA1107.1	KLF9	VSCCACACCCACH	2.91e-39	1.59e-36	9.2e-34
19	JASPAR2018_CORE_vertebrates_non-redundant.meme	MA0806.1	TBX4	AGGTGTGA	5.24e-39	3.68e-36	2.13e-33
20	JASPAR2018_CORE_vertebrates_non-redundant.meme	MA0050.2	IRF1	NTTYASTTTCACTTTCDBTTT	2.34e-38	1.17e-35	6.78e-33
21	JASPAR2018_CORE_vertebrates_non-redundant.meme	MA0595.1	SREBF1	VTCACCCCAY	1.4e-37	6.02e-35	3.48e-32
22	JASPAR2018_CORE_vertebrates_non-redundant.meme	MA0711.1	OTX1	HTAATCCS	2.21e-36	1.02e-33	5.91e-31
23	JASPAR2018_CORE_vertebrates_non-redundant.meme	MA0807.1	TBX5	AGGTGTKA	3.8e-36	3.36e-33	1.95e-30
24	JASPAR2018_CORE_vertebrates_non-redundant.meme	MA0513.1	SMAD2::SMAD3::SMAD4	CTGTCTGDCACCT	7.74e-35	4.26e-32	2.47e-29
25	JASPAR2018_CORE_vertebrates_non-redundant.meme	MA1099.1	Hes1	SVCACGYGHN	2.22e-34	7.11e-32	4.12e-29
26	JASPAR2018_CORE_vertebrates_non-redundant.meme	MA0014.3	PAX5	RRGCGTGACCNN	6.74e-34	2.37e-31	1.37e-28
27	JASPAR2018_CORE_vertebrates_non-redundant.meme	MA1114.1	PBX3	NNNTGAGTGACAGGBNN	8.57e-34	4.15e-31	2.41e-28
28	JASPAR2018_CORE_vertebrates_non-redundant.meme	MA0103.3	ZEB1	SNCACCTGSVN	1.19e-33	9.7e-31	5.62e-28
29	JASPAR2018_CORE_vertebrates_non-redundant.meme	MA0079.3	SP1	GCCCCKCCCCC	7.16e-33	4.69e-30	2.71e-27
30	JASPAR2018_CORE_vertebrates_non-redundant.meme	MA0111.1	Spz1	AGGGTWWCAGC	1.41e-31	8.15e-29	4.72e-26
31	JASPAR2018_CORE_vertebrates_non-redundant.meme	MA0803.1	TBX15	AGGTGTGA	2.83e-31	1.58e-28	9.13e-26
32	JASPAR2018_CORE_vertebrates_non-redundant.meme	MA0039.3	KLF4	MCACACCCTNN	1.19e-30	7.17e-28	4.15e-25
33	JASPAR2018_CORE_vertebrates_non-redundant.meme	MA0693.2	VDR	YRRGTTCA	5.89e-30	5.4e-27	3.13e-24
34	JASPAR2018_CORE_vertebrates_non-redundant.meme	MA0018.3	CREB1	NVTGACGTCABN	3.2e-29	9.44e-27	5.46e-24
35	JASPAR2018_CORE_vertebrates_non-redundant.meme	MA0805.1	TBX1	AGGTGTGA	1.09e-28	5.29e-26	3.06e-23
36	JASPAR2018_CORE_vertebrates_non-redundant.meme	MA0859.1	Rarg	RAGGTCAAAAGGTCAW	1.58e-27	1.25e-25	7.23e-23
37	JASPAR2018_CORE_vertebrates_non-redundant.meme	MA0483.1	Gfi1b	AAATCWCWGCH	4.67e-28	2.53e-25	1.47e-22
38	JASPAR2018_CORE_vertebrates_non-redundant.meme	MA0745.1	SNAI2	DRCAGGTGB	5.84e-28	5.13e-25	2.97e-22
39	JASPAR2018_CORE_vertebrates_non-redundant.meme	MA0494.1	Nr1h3::Rxra	TGACCTNNAGTRACCYYDN	1.71e-24	7.2e-22	4.17e-19
40	JASPAR2018_CORE_vertebrates_non-redundant.meme	MA0003.3	TFAP2A	HGCCYSAGGCD	2.3e-24	1.58e-21	9.12e-19
41	JASPAR2018_CORE_vertebrates_non-redundant.meme	MA0829.1	Srebf1(var.2)	ATCACGTGAY	1.34e-22	2.13e-20	1.23e-17
42	JASPAR2018_CORE_vertebrates_non-redundant.meme	MA0712.1	OTX2	YTAATCCB	3.76e-23	2.2e-20	1.27e-17
43	JASPAR2018_CORE_vertebrates_non-redundant.meme	MA0742.1	Klf12	GRCCACGCCCWHHWH	3.62e-22	6.74e-20	3.9e-17
44	JASPAR2018_CORE_vertebrates_non-redundant.meme	MA0673.1	NKX2-8	VCACTTSAV	8.81e-23	8.91e-20	5.16e-17
45	JASPAR2018_CORE_vertebrates_non-redundant.meme	MA0493.1	Klf1	RRCCACACCCW	3.47e-22	1.68e-19	9.73e-17
46	JASPAR2018_CORE_vertebrates_non-redundant.meme	MA0160.1	NR4A2	AAGGTCAC	3.32e-22	3.11e-19	1.8e-16
47	JASPAR2018_CORE_vertebrates_non-redundant.meme	MA0846.1	FOXC2	WAWGTAAACAWW	5.88e-22	4.32e-19	2.5e-16
48	JASPAR2018_CORE_vertebrates_non-redundant.meme	MA0857.1	Rarb	AAAGGTCAAAAGGTCA	8.45e-21	4.73e-19	2.74e-16
49	JASPAR2018_CORE_vertebrates_non-redundant.meme	MA0747.1	SP8	RCCACGCCCMCY	4.15e-21	2.66e-18	1.54e-15
50	JASPAR2018_CORE_vertebrates_non-redundant.meme	MA0596.1	SREBF2	RTGGGGTGAY	3.73e-20	1.53e-17	8.84e-15
51	JASPAR2018_CORE_vertebrates_non-redundant.meme	MA0778.1	NFKB2	AGGGGAWTCCCCY	2.11e-18	3.84e-16	2.23e-13
52	JASPAR2018_CORE_vertebrates_non-redundant.meme	MA0714.1	PITX3	NYTAATCCC	1.45e-18	9.05e-16	5.24e-13
53	JASPAR2018_CORE_vertebrates_non-redundant.meme	MA0820.1	FIGLA	WMCACCTGKW	2.11e-17	1.91e-14	1.11e-11
54	JASPAR2018_CORE_vertebrates_non-redundant.meme	MA0131.2	HINFP	CARCGTCCGCKN	1.16e-15	1.53e-13	8.87e-11
55	JASPAR2018_CORE_vertebrates_non-redundant.meme	MA0690.1	TBX21	AAGGTGTGAA	6.89e-16	2.52e-13	1.46e-10
56	JASPAR2018_CORE_vertebrates_non-redundant.meme	MA0738.1	HIC2	RTGCCCRSB	9.18e-16	9.53e-13	5.52e-10
57	JASPAR2018_CORE_vertebrates_non-redundant.meme	MA1142.1	FOSL1::JUND	NRTGACTCAT	1.71e-15	1.14e-12	6.62e-10
58	JASPAR2018_CORE_vertebrates_non-redundant.meme	MA0746.1	SP3	VCCACGCCCMC	1.72e-15	1.35e-12	7.82e-10
59	JASPAR2018_CORE_vertebrates_non-redundant.meme	MA0845.1	FOXB1	WATGTAAATAT	3.49e-15	1.67e-12	9.7e-10
60	JASPAR2018_CORE_vertebrates_non-redundant.meme	MA0802.1	TBR1	AGGTGTGAAA	5.83e-15	2.33e-12	1.35e-09
61	JASPAR2018_CORE_vertebrates_non-redundant.meme	MA0800.1	EOMES	RAGGTGTGAAAWN	1.11e-14	4.59e-12	2.66e-09
62	JASPAR2018_CORE_vertebrates_non-redundant.meme	MA0032.2	FOXC1	WAWGTAAAYAW	2.03e-14	1.29e-11	7.49e-09
63	JASPAR2018_CORE_vertebrates_non-redundant.meme	MA0831.2	TFE3	CACGTGAY	1.58e-13	4.74e-11	2.74e-08
64	JASPAR2018_CORE_vertebrates_non-redundant.meme	MA0822.1	HES7	YGGCACGTGCCR	2.03e-12	6.3e-11	3.65e-08
65	JASPAR2018_CORE_vertebrates_non-redundant.meme	MA0149.1	EWSR1-FLI1	GGAAGGAAGGAAGGAAGG	5.08e-12	1.37e-10	7.94e-08
66	JASPAR2018_CORE_vertebrates_non-redundant.meme	MA0259.1	ARNT::HIF1A	VBACGTGC	2.64e-12	5.43e-10	3.14e-07
67	JASPAR2018_CORE_vertebrates_non-redundant.meme	MA0471.1	E2F6	RGGCGGGARRV	1.45e-11	6.52e-09	3.78e-06
68	JASPAR2018_CORE_vertebrates_non-redundant.meme	MA0649.1	HEY2	GRCACGTGYC	1.39e-10	1.7e-08	9.85e-06
69	JASPAR2018_CORE_vertebrates_non-redundant.meme	MA0073.1	RREB1	CCCCMAAMCAMCCMCMMMCV	8.94e-10	1.08e-07	6.26e-05
70	JASPAR2018_CORE_vertebrates_non-redundant.meme	MA1101.1	BACH2	NMTGACTCAGCANH	3.86e-10	1.15e-07	6.69e-05
71	JASPAR2018_CORE_vertebrates_non-redundant.meme	MA0740.1	KLF14	KRCCACGCCCMCYT	1.12e-09	1.8e-07	0.000104
72	JASPAR2018_CORE_vertebrates_non-redundant.meme	MA0851.1	Foxj3	NDAADGTAAACAAANNM	8.95e-10	3.86e-07	0.000223
73	JASPAR2018_CORE_vertebrates_non-redundant.meme	MA0150.2	Nfe2l2	CASNATGACTCAGCA	2.68e-09	5.8e-07	0.000336
74	JASPAR2018_CORE_vertebrates_non-redundant.meme	MA0861.1	TP73	DRCATGTCNNRACAYGYM	6.41e-09	5.96e-07	0.000345
75	JASPAR2018_CORE_vertebrates_non-redundant.meme	MA0052.3	MEF2A	KCTAWAAATAGM	3.85e-09	6.01e-07	0.000348
76	JASPAR2018_CORE_vertebrates_non-redundant.meme	MA0004.1	Arnt	CACGTG	8.57e-09	8.31e-07	0.000481
77	JASPAR2018_CORE_vertebrates_non-redundant.meme	MA0632.1	Tcfl5	NBCDCGHGVN	9.41e-09	2.03e-06	0.00118
78	JASPAR2018_CORE_vertebrates_non-redundant.meme	MA0739.1	Hic1	RTGCCAACY	3.96e-09	3.36e-06	0.00194
79	JASPAR2018_CORE_vertebrates_non-redundant.meme	MA0006.1	Ahr::Arnt	YGCGTG	1.9e-08	5.32e-06	0.00308
80	JASPAR2018_CORE_vertebrates_non-redundant.meme	MA0688.1	TBX2	DAGGTGTGAAA	1.03e-08	5.67e-06	0.00328
81	JASPAR2018_CORE_vertebrates_non-redundant.meme	MA0823.1	HEY1	GRCACGTGCC	1.57e-07	1.44e-05	0.00834
82	JASPAR2018_CORE_vertebrates_non-redundant.meme	MA0599.1	KLF5	GCCCCDCCCH	3.53e-08	2.11e-05	0.0122
83	JASPAR2018_CORE_vertebrates_non-redundant.meme	MA0093.2	USF1	VYCAYGTGACC	7.8e-08	2.45e-05	0.0142
84	JASPAR2018_CORE_vertebrates_non-redundant.meme	MA0821.1	HES5	YGGCACGTGCCR	1.09e-05	0.000175	0.101
85	JASPAR2018_CORE_vertebrates_non-redundant.meme	MA0495.2	MAFF	DWWTTGCTGAGTCAGCAAWWW	9.67e-07	0.000185	0.107
86	JASPAR2018_CORE_vertebrates_non-redundant.meme	MA0616.1	Hes2	NNNNGRCACGTGM	1.15e-06	0.000339	0.196
87	JASPAR2018_CORE_vertebrates_non-redundant.meme	MA0130.1	ZNF354C	MTCCAC	3.71e-07	0.000413	0.239
88	JASPAR2018_CORE_vertebrates_non-redundant.meme	MA0464.2	BHLHE40	VKCACGTGMC	7.96e-06	0.000493	0.286
89	JASPAR2018_CORE_vertebrates_non-redundant.meme	MA0058.3	MAX	AVCACGTGNY	6.86e-06	0.000679	0.393
90	JASPAR2018_CORE_vertebrates_non-redundant.meme	MA0636.1	BHLHE41	RTCACGTGAC	7.72e-05	0.00139	0.805
91	JASPAR2018_CORE_vertebrates_non-redundant.meme	MA0825.1	MNT	RVCACGTGMH	1.91e-05	0.00174	1.01
92	JASPAR2018_CORE_vertebrates_non-redundant.meme	MA0626.1	Npas2	NSCACGTGTN	1.22e-05	0.00174	1.01
93	JASPAR2018_CORE_vertebrates_non-redundant.meme	MA1108.1	MXI1	NVVCCACGTGSNB	1.03e-05	0.00177	1.03
94	JASPAR2018_CORE_vertebrates_non-redundant.meme	MA0102.3	CEBPA	ATTGCAYAAYH	4.91e-06	0.00234	1.36
95	JASPAR2018_CORE_vertebrates_non-redundant.meme	MA0622.1	Mlxip	BCACGTGK	2.48e-05	0.00236	1.36
96	JASPAR2018_CORE_vertebrates_non-redundant.meme	MA0617.1	Id2	RCACGTGR	2.48e-05	0.00236	1.36
97	JASPAR2018_CORE_vertebrates_non-redundant.meme	MA0147.3	MYC	NNCCACGTGCNB	1.43e-05	0.00339	1.96
98	JASPAR2018_CORE_vertebrates_non-redundant.meme	MA0095.2	YY1	CAARATGGCBGC	1.02e-05	0.00348	2.01
99	JASPAR2018_CORE_vertebrates_non-redundant.meme	MA1121.1	TEAD2	NYACATTCCWNNS	8.39e-06	0.00367	2.13
100	JASPAR2018_CORE_vertebrates_non-redundant.meme	MA0698.1	ZBTB18	NATCCAGATGTKB	2.08e-05	0.00564	3.26
101	JASPAR2018_CORE_vertebrates_non-redundant.meme	MA0734.1	GLI2	GCGACCACMCTR	3.39e-05	0.00578	3.35
102	JASPAR2018_CORE_vertebrates_non-redundant.meme	MA0653.1	IRF9	AACGAAACCGAAACT	0.00135	0.00941	5.45
103	JASPAR2018_CORE_vertebrates_non-redundant.meme	MA0117.2	Mafb	AWWNTGCTGACD	2.86e-05	0.0121	7
104	JASPAR2018_CORE_vertebrates_non-redundant.meme	MA0871.1	TFEC	RTCACRTGAB	3.1e-05	0.0129	7.49
105	JASPAR2018_CORE_vertebrates_non-redundant.meme	MA0664.1	MLXIPL	RTCACGTGAT	0.000176	0.0133	7.7
106	JASPAR2018_CORE_vertebrates_non-redundant.meme	MA1111.1	NR2F2	NAAAGGTCANR	2.92e-05	0.0142	8.24
107	JASPAR2018_CORE_vertebrates_non-redundant.meme	MA0773.1	MEF2D	DCTAWAAATAGM	0.000212	0.0157	9.12
108	JASPAR2018_CORE_vertebrates_non-redundant.meme	MA0692.1	TFEB	RYCACGTGAC	6.16e-05	0.0166	9.62

## Sheet: Heart
Rank	Motif DB	Motif ID	TF	Consensus	P-value	Adjusted P-value	E-value
1	JASPAR2018_CORE_vertebrates_non-redundant.meme	MA1125.1	ZNF384	DNWMAAAAAAAA	2.99e-55	2.09e-52	1.21e-49
2	JASPAR2018_CORE_vertebrates_non-redundant.meme	MA0719.1	RHOXF1	NTRATCCN	1.2e-35	8.67e-33	5.02e-30
3	JASPAR2018_CORE_vertebrates_non-redundant.meme	MA0478.1	FOSL2	KRRTGASTCAB	3.71e-34	6.75e-32	3.91e-29
4	JASPAR2018_CORE_vertebrates_non-redundant.meme	MA0814.1	TFAP2C(var.2)	HGCCTSAGGCD	1.04e-31	4.23e-29	2.45e-26
5	JASPAR2018_CORE_vertebrates_non-redundant.meme	MA0824.1	ID4	NRCACCTGBH	1.1e-29	5.04e-27	2.92e-24
6	JASPAR2018_CORE_vertebrates_non-redundant.meme	MA0497.1	MEF2C	DDDCYAAAAATAGMW	2.49e-29	8.76e-27	5.07e-24
7	JASPAR2018_CORE_vertebrates_non-redundant.meme	MA0830.1	TCF4	HRCACCTGBN	3.98e-28	1.96e-25	1.13e-22
8	JASPAR2018_CORE_vertebrates_non-redundant.meme	MA0682.1	Pitx1	YTAATCCH	6.16e-28	2.81e-25	1.63e-22
9	JASPAR2018_CORE_vertebrates_non-redundant.meme	MA1107.1	KLF9	VSCCACACCCACH	5.94e-27	1.79e-24	1.04e-21
10	JASPAR2018_CORE_vertebrates_non-redundant.meme	MA0516.1	SP2	GYCCCGCCYCYBSSS	1.58e-25	4.78e-23	2.77e-20
11	JASPAR2018_CORE_vertebrates_non-redundant.meme	MA0146.2	Zfx	SSSGCCBVGGCCTS	2.37e-24	8.13e-22	4.71e-19
12	JASPAR2018_CORE_vertebrates_non-redundant.meme	MA0019.1	Ddit3::Cebpa	VNRTGCAATMCC	2.03e-23	6.9e-21	3.99e-18
13	JASPAR2018_CORE_vertebrates_non-redundant.meme	MA0801.1	MGA	AGGTGTGA	3.43e-23	1.15e-20	6.63e-18
14	JASPAR2018_CORE_vertebrates_non-redundant.meme	MA0017.2	NR2F1	CARAGGTCAMVNG	1.58e-22	4.99e-20	2.89e-17
15	JASPAR2018_CORE_vertebrates_non-redundant.meme	MA0711.1	OTX1	HTAATCCS	4.08e-22	1.02e-19	5.9e-17
16	JASPAR2018_CORE_vertebrates_non-redundant.meme	MA0041.1	Foxd3	GWWTGTTTDTTT	1.12e-19	4.5e-17	2.6e-14
17	JASPAR2018_CORE_vertebrates_non-redundant.meme	MA0522.2	TCF3	HRCACCTGBN	1.58e-19	8.21e-17	4.75e-14
18	JASPAR2018_CORE_vertebrates_non-redundant.meme	MA0039.3	KLF4	MCACACCCTNN	5.99e-18	2.26e-15	1.31e-12
19	JASPAR2018_CORE_vertebrates_non-redundant.meme	MA0807.1	TBX5	AGGTGTKA	6.41e-18	3.6e-15	2.08e-12
20	JASPAR2018_CORE_vertebrates_non-redundant.meme	MA0528.1	ZNF263	GGAGGAGGRRGRGGRGGRRGR	1.89e-17	8e-15	4.63e-12
21	JASPAR2018_CORE_vertebrates_non-redundant.meme	MA0493.1	Klf1	RRCCACACCCW	6.5e-17	1.87e-14	1.08e-11
22	JASPAR2018_CORE_vertebrates_non-redundant.meme	MA0742.1	Klf12	GRCCACGCCCWHHWH	3.77e-16	3.58e-14	2.07e-11
23	JASPAR2018_CORE_vertebrates_non-redundant.meme	MA0103.3	ZEB1	SNCACCTGSVN	7.91e-17	3.88e-14	2.25e-11
24	JASPAR2018_CORE_vertebrates_non-redundant.meme	MA0728.1	Nr2f6(var.2)	RAGGTCAARAGGTCA	3.2e-15	8.64e-14	5e-11
25	JASPAR2018_CORE_vertebrates_non-redundant.meme	MA0806.1	TBX4	AGGTGTGA	2e-15	8.28e-13	4.79e-10
26	JASPAR2018_CORE_vertebrates_non-redundant.meme	MA0803.1	TBX15	AGGTGTGA	3.06e-15	9.17e-13	5.31e-10
27	JASPAR2018_CORE_vertebrates_non-redundant.meme	MA0014.3	PAX5	RRGCGTGACCNN	5.82e-15	1.05e-12	6.07e-10
28	JASPAR2018_CORE_vertebrates_non-redundant.meme	MA0805.1	TBX1	AGGTGTGA	1.19e-14	3.49e-12	2.02e-09
29	JASPAR2018_CORE_vertebrates_non-redundant.meme	MA1114.1	PBX3	NNNTGAGTGACAGGBNN	1.45e-14	4.07e-12	2.36e-09
30	JASPAR2018_CORE_vertebrates_non-redundant.meme	MA0513.1	SMAD2::SMAD3::SMAD4	CTGTCTGDCACCT	3.73e-14	1.2e-11	6.95e-09
31	JASPAR2018_CORE_vertebrates_non-redundant.meme	MA0494.1	Nr1h3::Rxra	TGACCTNNAGTRACCYYDN	7.36e-14	1.88e-11	1.09e-08
32	JASPAR2018_CORE_vertebrates_non-redundant.meme	MA0693.2	VDR	YRRGTTCA	4.3e-14	2.37e-11	1.37e-08
33	JASPAR2018_CORE_vertebrates_non-redundant.meme	MA0018.3	CREB1	NVTGACGTCABN	1.99e-13	3.02e-11	1.75e-08
34	JASPAR2018_CORE_vertebrates_non-redundant.meme	MA0859.1	Rarg	RAGGTCAAAAGGTCAW	1.9e-12	4.74e-11	2.74e-08
35	JASPAR2018_CORE_vertebrates_non-redundant.meme	MA0747.1	SP8	RCCACGCCCMCY	1.68e-13	6.05e-11	3.5e-08
36	JASPAR2018_CORE_vertebrates_non-redundant.meme	MA0745.1	SNAI2	DRCAGGTGB	1.3e-13	7.98e-11	4.62e-08
37	JASPAR2018_CORE_vertebrates_non-redundant.meme	MA0003.3	TFAP2A	HGCCYSAGGCD	2.15e-13	9.25e-11	5.36e-08
38	JASPAR2018_CORE_vertebrates_non-redundant.meme	MA0857.1	Rarb	AAAGGTCAAAAGGTCA	1.05e-11	2.21e-10	1.28e-07
39	JASPAR2018_CORE_vertebrates_non-redundant.meme	MA0483.1	Gfi1b	AAATCWCWGCH	1.75e-12	6e-10	3.48e-07
40	JASPAR2018_CORE_vertebrates_non-redundant.meme	MA0079.3	SP1	GCCCCKCCCCC	1.76e-12	6.12e-10	3.54e-07
41	JASPAR2018_CORE_vertebrates_non-redundant.meme	MA0746.1	SP3	VCCACGCCCMC	2.73e-12	1.17e-09	6.79e-07
42	JASPAR2018_CORE_vertebrates_non-redundant.meme	MA1142.1	FOSL1::JUND	NRTGACTCAT	3.86e-12	1.6e-09	9.28e-07
43	JASPAR2018_CORE_vertebrates_non-redundant.meme	MA0050.2	IRF1	NTTYASTTTCACTTTCDBTTT	8.73e-12	2.01e-09	1.16e-06
44	JASPAR2018_CORE_vertebrates_non-redundant.meme	MA0714.1	PITX3	NYTAATCCC	6.27e-12	2.36e-09	1.37e-06
45	JASPAR2018_CORE_vertebrates_non-redundant.meme	MA0595.1	SREBF1	VTCACCCCAY	2.69e-11	6.22e-09	3.6e-06
46	JASPAR2018_CORE_vertebrates_non-redundant.meme	MA0829.1	Srebf1(var.2)	ATCACGTGAY	1.46e-10	9.19e-09	5.32e-06
47	JASPAR2018_CORE_vertebrates_non-redundant.meme	MA1099.1	Hes1	SVCACGYGHN	1.86e-10	3.44e-08	1.99e-05
48	JASPAR2018_CORE_vertebrates_non-redundant.meme	MA0712.1	OTX2	YTAATCCB	1.3e-10	4.59e-08	2.66e-05
49	JASPAR2018_CORE_vertebrates_non-redundant.meme	MA0471.1	E2F6	RGGCGGGARRV	1.84e-10	4.74e-08	2.74e-05
50	JASPAR2018_CORE_vertebrates_non-redundant.meme	MA0738.1	HIC2	RTGCCCRSB	1.11e-10	7.83e-08	4.54e-05
51	JASPAR2018_CORE_vertebrates_non-redundant.meme	MA0673.1	NKX2-8	VCACTTSAV	6.93e-10	3.98e-07	0.00023
52	JASPAR2018_CORE_vertebrates_non-redundant.meme	MA0820.1	FIGLA	WMCACCTGKW	2.14e-09	1.22e-06	0.000708
53	JASPAR2018_CORE_vertebrates_non-redundant.meme	MA0111.1	Spz1	AGGGTWWCAGC	4.05e-09	1.35e-06	0.000779
54	JASPAR2018_CORE_vertebrates_non-redundant.meme	MA0160.1	NR4A2	AAGGTCAC	8.6e-09	5.12e-06	0.00296
55	JASPAR2018_CORE_vertebrates_non-redundant.meme	MA0149.1	EWSR1-FLI1	GGAAGGAAGGAAGGAAGG	8.73e-07	9.6e-06	0.00556
56	JASPAR2018_CORE_vertebrates_non-redundant.meme	MA1101.1	BACH2	NMTGACTCAGCANH	5.59e-08	1.01e-05	0.00582
57	JASPAR2018_CORE_vertebrates_non-redundant.meme	MA0846.1	FOXC2	WAWGTAAACAWW	2.94e-08	1.23e-05	0.00709
58	JASPAR2018_CORE_vertebrates_non-redundant.meme	MA0822.1	HES7	YGGCACGTGCCR	1.66e-06	2.33e-05	0.0135
59	JASPAR2018_CORE_vertebrates_non-redundant.meme	MA0773.1	MEF2D	DCTAWAAATAGM	4.35e-07	2.35e-05	0.0136
60	JASPAR2018_CORE_vertebrates_non-redundant.meme	MA0802.1	TBR1	AGGTGTGAAA	2.89e-07	7.58e-05	0.0439
61	JASPAR2018_CORE_vertebrates_non-redundant.meme	MA0660.1	MEF2B	RCTAWAAATAGC	2.91e-06	0.000143	0.0827
62	JASPAR2018_CORE_vertebrates_non-redundant.meme	MA0599.1	KLF5	GCCCCDCCCH	3.93e-07	0.000146	0.0842
63	JASPAR2018_CORE_vertebrates_non-redundant.meme	MA0052.3	MEF2A	KCTAWAAATAGM	1.67e-06	0.000152	0.088
64	JASPAR2018_CORE_vertebrates_non-redundant.meme	MA0845.1	FOXB1	WATGTAAATAT	1.37e-06	0.000349	0.202
65	JASPAR2018_CORE_vertebrates_non-redundant.meme	MA0690.1	TBX21	AAGGTGTGAA	1.61e-06	0.000358	0.207
66	JASPAR2018_CORE_vertebrates_non-redundant.meme	MA1137.1	FOSL1::JUNB	NDRTGACTCATNN	1.69e-06	0.00045	0.261
67	JASPAR2018_CORE_vertebrates_non-redundant.meme	MA0740.1	KLF14	KRCCACGCCCMCYT	5.21e-06	0.000474	0.275
68	JASPAR2018_CORE_vertebrates_non-redundant.meme	MA0073.1	RREB1	CCCCMAAMCAMCCMCMMMCV	7.49e-06	0.00048	0.278
69	JASPAR2018_CORE_vertebrates_non-redundant.meme	MA0131.2	HINFP	CARCGTCCGCKN	3.55e-05	0.00241	1.4
70	JASPAR2018_CORE_vertebrates_non-redundant.meme	MA0861.1	TP73	DRCATGTCNNRACAYGYM	6.23e-05	0.00354	2.05
71	JASPAR2018_CORE_vertebrates_non-redundant.meme	MA0821.1	HES5	YGGCACGTGCCR	0.000453	0.00407	2.36
72	JASPAR2018_CORE_vertebrates_non-redundant.meme	MA0032.2	FOXC1	WAWGTAAAYAW	2.07e-05	0.00704	4.08
73	JASPAR2018_CORE_vertebrates_non-redundant.meme	MA0851.1	Foxj3	NDAADGTAAACAAANNM	2.99e-05	0.00765	4.43
74	JASPAR2018_CORE_vertebrates_non-redundant.meme	MA0596.1	SREBF2	RTGGGGTGAY	5.35e-05	0.0122	7.05

## Sheet: Liver
Rank	Motif DB	Motif ID	TF	Consensus	P-value	Adjusted P-value	E-value
1	JASPAR2018_CORE_vertebrates_non-redundant.meme	MA1125.1	ZNF384	DNWMAAAAAAAA	3.01e-105	2.69e-102	1.56e-99
2	JASPAR2018_CORE_vertebrates_non-redundant.meme	MA0497.1	MEF2C	DDDCYAAAAATAGMW	5.53e-77	2.8e-74	1.62e-71
3	JASPAR2018_CORE_vertebrates_non-redundant.meme	MA0719.1	RHOXF1	NTRATCCN	1.86e-61	1.64e-58	9.48e-56
4	JASPAR2018_CORE_vertebrates_non-redundant.meme	MA0682.1	Pitx1	YTAATCCH	1.46e-55	8.88e-53	5.14e-50
5	JASPAR2018_CORE_vertebrates_non-redundant.meme	MA0146.2	Zfx	SSSGCCBVGGCCTS	1.18e-48	5.99e-46	3.47e-43
6	JASPAR2018_CORE_vertebrates_non-redundant.meme	MA0041.1	Foxd3	GWWTGTTTDTTT	6.02e-48	3.68e-45	2.13e-42
7	JASPAR2018_CORE_vertebrates_non-redundant.meme	MA0801.1	MGA	AGGTGTGA	8.45e-48	3.86e-45	2.23e-42
8	JASPAR2018_CORE_vertebrates_non-redundant.meme	MA0019.1	Ddit3::Cebpa	VNRTGCAATMCC	3.79e-47	1.82e-44	1.05e-41
9	JASPAR2018_CORE_vertebrates_non-redundant.meme	MA0014.3	PAX5	RRGCGTGACCNN	1.99e-45	6.13e-43	3.55e-40
10	JASPAR2018_CORE_vertebrates_non-redundant.meme	MA0814.1	TFAP2C(var.2)	HGCCTSAGGCD	3.04e-45	1.72e-42	9.95e-40
11	JASPAR2018_CORE_vertebrates_non-redundant.meme	MA0017.2	NR2F1	CARAGGTCAMVNG	1.17e-44	5.58e-42	3.23e-39
12	JASPAR2018_CORE_vertebrates_non-redundant.meme	MA0050.2	IRF1	NTTYASTTTCACTTTCDBTTT	9.79e-42	3.68e-39	2.13e-36
13	JASPAR2018_CORE_vertebrates_non-redundant.meme	MA0824.1	ID4	NRCACCTGBH	3.35e-41	1.9e-38	1.1e-35
14	JASPAR2018_CORE_vertebrates_non-redundant.meme	MA0711.1	OTX1	HTAATCCS	8.94e-39	3.49e-36	2.02e-33
15	JASPAR2018_CORE_vertebrates_non-redundant.meme	MA0478.1	FOSL2	KRRTGASTCAB	3.04e-38	8.4e-36	4.87e-33
16	JASPAR2018_CORE_vertebrates_non-redundant.meme	MA1107.1	KLF9	VSCCACACCCACH	1.09e-36	4.7e-34	2.72e-31
17	JASPAR2018_CORE_vertebrates_non-redundant.meme	MA0829.1	Srebf1(var.2)	ATCACGTGAY	3.09e-33	4.08e-31	2.36e-28
18	JASPAR2018_CORE_vertebrates_non-redundant.meme	MA0830.1	TCF4	HRCACCTGBN	4.85e-33	2.99e-30	1.73e-27
19	JASPAR2018_CORE_vertebrates_non-redundant.meme	MA0693.2	VDR	YRRGTTCA	3.02e-32	2.22e-29	1.28e-26
20	JASPAR2018_CORE_vertebrates_non-redundant.meme	MA0516.1	SP2	GYCCCGCCYCYBSSS	2.77e-31	1.38e-28	7.97e-26
21	JASPAR2018_CORE_vertebrates_non-redundant.meme	MA0494.1	Nr1h3::Rxra	TGACCTNNAGTRACCYYDN	2.92e-28	1.01e-25	5.83e-23
22	JASPAR2018_CORE_vertebrates_non-redundant.meme	MA0528.1	ZNF263	GGAGGAGGRRGRGGRGGRRGR	4.31e-27	2.64e-24	1.53e-21
23	JASPAR2018_CORE_vertebrates_non-redundant.meme	MA0103.3	ZEB1	SNCACCTGSVN	3.47e-26	2.24e-23	1.29e-20
24	JASPAR2018_CORE_vertebrates_non-redundant.meme	MA0522.2	TCF3	HRCACCTGBN	3.89e-26	2.61e-23	1.51e-20
25	JASPAR2018_CORE_vertebrates_non-redundant.meme	MA0846.1	FOXC2	WAWGTAAACAWW	6.83e-26	3.63e-23	2.1e-20
26	JASPAR2018_CORE_vertebrates_non-redundant.meme	MA0079.3	SP1	GCCCCKCCCCC	1.66e-25	9.54e-23	5.53e-20
27	JASPAR2018_CORE_vertebrates_non-redundant.meme	MA0111.1	Spz1	AGGGTWWCAGC	4.02e-25	1.85e-22	1.07e-19
28	JASPAR2018_CORE_vertebrates_non-redundant.meme	MA0728.1	Nr2f6(var.2)	RAGGTCAARAGGTCA	2.39e-23	1.27e-21	7.33e-19
29	JASPAR2018_CORE_vertebrates_non-redundant.meme	MA0806.1	TBX4	AGGTGTGA	4.78e-24	2.4e-21	1.39e-18
30	JASPAR2018_CORE_vertebrates_non-redundant.meme	MA0712.1	OTX2	YTAATCCB	6.12e-24	2.77e-21	1.6e-18
31	JASPAR2018_CORE_vertebrates_non-redundant.meme	MA0483.1	Gfi1b	AAATCWCWGCH	4.39e-23	1.98e-20	1.15e-17
32	JASPAR2018_CORE_vertebrates_non-redundant.meme	MA0807.1	TBX5	AGGTGTKA	3.71e-23	2.41e-20	1.4e-17
33	JASPAR2018_CORE_vertebrates_non-redundant.meme	MA0859.1	Rarg	RAGGTCAAAAGGTCAW	2.91e-21	1.57e-19	9.09e-17
34	JASPAR2018_CORE_vertebrates_non-redundant.meme	MA0745.1	SNAI2	DRCAGGTGB	2.22e-21	1.53e-18	8.88e-16
35	JASPAR2018_CORE_vertebrates_non-redundant.meme	MA0595.1	SREBF1	VTCACCCCAY	3.61e-20	1.18e-17	6.81e-15
36	JASPAR2018_CORE_vertebrates_non-redundant.meme	MA0714.1	PITX3	NYTAATCCC	2.44e-20	1.18e-17	6.85e-15
37	JASPAR2018_CORE_vertebrates_non-redundant.meme	MA0747.1	SP8	RCCACGCCCMCY	3.58e-20	1.79e-17	1.03e-14
38	JASPAR2018_CORE_vertebrates_non-redundant.meme	MA0803.1	TBX15	AGGTGTGA	1.58e-19	5.04e-17	2.92e-14
39	JASPAR2018_CORE_vertebrates_non-redundant.meme	MA0857.1	Rarb	AAAGGTCAAAAGGTCA	5.61e-17	1.96e-15	1.14e-12
40	JASPAR2018_CORE_vertebrates_non-redundant.meme	MA1099.1	Hes1	SVCACGYGHN	2.11e-17	4.94e-15	2.86e-12
41	JASPAR2018_CORE_vertebrates_non-redundant.meme	MA0032.2	FOXC1	WAWGTAAAYAW	1.15e-17	5.25e-15	3.04e-12
42	JASPAR2018_CORE_vertebrates_non-redundant.meme	MA0513.1	SMAD2::SMAD3::SMAD4	CTGTCTGDCACCT	3.34e-17	1.4e-14	8.13e-12
43	JASPAR2018_CORE_vertebrates_non-redundant.meme	MA0596.1	SREBF2	RTGGGGTGAY	8.72e-17	2.77e-14	1.61e-11
44	JASPAR2018_CORE_vertebrates_non-redundant.meme	MA0018.3	CREB1	NVTGACGTCABN	1.74e-16	3.92e-14	2.27e-11
45	JASPAR2018_CORE_vertebrates_non-redundant.meme	MA0039.3	KLF4	MCACACCCTNN	1.5e-16	6.99e-14	4.04e-11
46	JASPAR2018_CORE_vertebrates_non-redundant.meme	MA0805.1	TBX1	AGGTGTGA	7.04e-16	2.49e-13	1.44e-10
47	JASPAR2018_CORE_vertebrates_non-redundant.meme	MA0160.1	NR4A2	AAGGTCAC	1.71e-15	1.31e-12	7.6e-10
48	JASPAR2018_CORE_vertebrates_non-redundant.meme	MA0046.2	HNF1A	DRTTAATNATTAACN	2.48e-14	3.69e-12	2.14e-09
49	JASPAR2018_CORE_vertebrates_non-redundant.meme	MA0493.1	Klf1	RRCCACACCCW	2.15e-14	7.99e-12	4.63e-09
50	JASPAR2018_CORE_vertebrates_non-redundant.meme	MA0742.1	Klf12	GRCCACGCCCWHHWH	1.12e-13	1.34e-11	7.73e-09
51	JASPAR2018_CORE_vertebrates_non-redundant.meme	MA0851.1	Foxj3	NDAADGTAAACAAANNM	4.93e-14	1.68e-11	9.73e-09
52	JASPAR2018_CORE_vertebrates_non-redundant.meme	MA0820.1	FIGLA	WMCACCTGKW	3.94e-14	2.73e-11	1.58e-08
53	JASPAR2018_CORE_vertebrates_non-redundant.meme	MA0746.1	SP3	VCCACGCCCMC	4.99e-14	2.95e-11	1.71e-08
54	JASPAR2018_CORE_vertebrates_non-redundant.meme	MA1114.1	PBX3	NNNTGAGTGACAGGBNN	2.66e-13	1.03e-10	5.94e-08
55	JASPAR2018_CORE_vertebrates_non-redundant.meme	MA0673.1	NKX2-8	VCACTTSAV	1.73e-13	1.3e-10	7.53e-08
56	JASPAR2018_CORE_vertebrates_non-redundant.meme	MA0822.1	HES7	YGGCACGTGCCR	9.82e-12	2.16e-10	1.25e-07
57	JASPAR2018_CORE_vertebrates_non-redundant.meme	MA0052.3	MEF2A	KCTAWAAATAGM	5.59e-12	8.88e-10	5.14e-07
58	JASPAR2018_CORE_vertebrates_non-redundant.meme	MA0831.2	TFE3	CACGTGAY	3.88e-12	1.01e-09	5.83e-07
59	JASPAR2018_CORE_vertebrates_non-redundant.meme	MA0660.1	MEF2B	RCTAWAAATAGC	1.4e-11	1.39e-09	8.03e-07
60	JASPAR2018_CORE_vertebrates_non-redundant.meme	MA0131.2	HINFP	CARCGTCCGCKN	2.92e-11	2.83e-09	1.64e-06
61	JASPAR2018_CORE_vertebrates_non-redundant.meme	MA0649.1	HEY2	GRCACGTGYC	4.79e-11	6.13e-09	3.55e-06
62	JASPAR2018_CORE_vertebrates_non-redundant.meme	MA0778.1	NFKB2	AGGGGAWTCCCCY	6.2e-11	1.04e-08	6.03e-06
63	JASPAR2018_CORE_vertebrates_non-redundant.meme	MA0102.3	CEBPA	ATTGCAYAAYH	3.58e-11	1.44e-08	8.34e-06
64	JASPAR2018_CORE_vertebrates_non-redundant.meme	MA0879.1	Dlx1	NVTAATTANN	7.15e-11	4.02e-08	2.33e-05
65	JASPAR2018_CORE_vertebrates_non-redundant.meme	MA0871.1	TFEC	RTCACRTGAB	1.59e-10	4.88e-08	2.82e-05
66	JASPAR2018_CORE_vertebrates_non-redundant.meme	MA1142.1	FOSL1::JUND	NRTGACTCAT	1.04e-10	4.92e-08	2.85e-05
67	JASPAR2018_CORE_vertebrates_non-redundant.meme	MA0821.1	HES5	YGGCACGTGCCR	2.29e-09	5.49e-08	3.18e-05
68	JASPAR2018_CORE_vertebrates_non-redundant.meme	MA0740.1	KLF14	KRCCACGCCCMCYT	1.2e-09	1.51e-07	8.72e-05
69	JASPAR2018_CORE_vertebrates_non-redundant.meme	MA0836.1	CEBPD	RTTRCGCAAY	1.35e-09	2e-07	0.000116
70	JASPAR2018_CORE_vertebrates_non-redundant.meme	MA0773.1	MEF2D	DCTAWAAATAGM	2.79e-09	2.45e-07	0.000142
71	JASPAR2018_CORE_vertebrates_non-redundant.meme	MA0692.1	TFEB	RYCACGTGAC	1.56e-09	3.5e-07	0.000203
72	JASPAR2018_CORE_vertebrates_non-redundant.meme	MA0466.2	CEBPB	RTTRCGCAAY	2.33e-09	3.82e-07	0.000221
73	JASPAR2018_CORE_vertebrates_non-redundant.meme	MA0837.1	CEBPE	VTTRCGCAAY	4.65e-09	1e-06	0.000581
74	JASPAR2018_CORE_vertebrates_non-redundant.meme	MA0003.3	TFAP2A	HGCCYSAGGCD	2.06e-09	1.13e-06	0.000652
75	JASPAR2018_CORE_vertebrates_non-redundant.meme	MA0073.1	RREB1	CCCCMAAMCAMCCMCMMMCV	1.08e-08	1.14e-06	0.000662
76	JASPAR2018_CORE_vertebrates_non-redundant.meme	MA0838.1	CEBPG	ATTRCGCAAY	2.13e-08	1.87e-06	0.00108
77	JASPAR2018_CORE_vertebrates_non-redundant.meme	MA0845.1	FOXB1	WATGTAAATAT	3e-08	9.79e-06	0.00567
78	JASPAR2018_CORE_vertebrates_non-redundant.meme	MA0823.1	HEY1	GRCACGTGCC	1.22e-07	1.24e-05	0.0072
79	JASPAR2018_CORE_vertebrates_non-redundant.meme	MA0464.2	BHLHE40	VKCACGTGMC	2.12e-07	1.55e-05	0.00897
80	JASPAR2018_CORE_vertebrates_non-redundant.meme	MA0601.1	Arid3b	ATATTAATWAN	5.39e-08	2.82e-05	0.0164
81	JASPAR2018_CORE_vertebrates_non-redundant.meme	MA0757.1	ONECUT3	AAAAAATCRATAAH	2.39e-07	3.13e-05	0.0181
82	JASPAR2018_CORE_vertebrates_non-redundant.meme	MA0891.1	GSC2	NYTAATCCBH	1.2e-07	3.7e-05	0.0214
83	JASPAR2018_CORE_vertebrates_non-redundant.meme	MA0130.1	ZNF354C	MTCCAC	7.42e-08	6.2e-05	0.0359
84	JASPAR2018_CORE_vertebrates_non-redundant.meme	MA0636.1	BHLHE41	RTCACGTGAC	2.83e-06	7.65e-05	0.0443
85	JASPAR2018_CORE_vertebrates_non-redundant.meme	MA0632.1	Tcfl5	NBCDCGHGVN	5.91e-07	0.000103	0.0599
86	JASPAR2018_CORE_vertebrates_non-redundant.meme	MA0847.1	FOXD2	GTAAACA	2.26e-07	0.00012	0.0692
87	JASPAR2018_CORE_vertebrates_non-redundant.meme	MA0153.2	HNF1B	GTTAATNATTAAY	1.19e-06	0.000125	0.0725
88	JASPAR2018_CORE_vertebrates_non-redundant.meme	MA0738.1	HIC2	RTGCCCRSB	2.29e-07	0.000195	0.113
89	JASPAR2018_CORE_vertebrates_non-redundant.meme	MA0616.1	Hes2	NNNNGRCACGTGM	8.67e-07	0.000225	0.131
90	JASPAR2018_CORE_vertebrates_non-redundant.meme	MA0861.1	TP73	DRCATGTCNNRACAYGYM	4.96e-06	0.000357	0.207
91	JASPAR2018_CORE_vertebrates_non-redundant.meme	MA0790.1	POU4F1	ATGMATAATTAATG	1.81e-06	0.000502	0.291
92	JASPAR2018_CORE_vertebrates_non-redundant.meme	MA0149.1	EWSR1-FLI1	GGAAGGAAGGAAGGAAGG	5.84e-05	0.000759	0.439
93	JASPAR2018_CORE_vertebrates_non-redundant.meme	MA0819.1	CLOCK	AACACGTGTH	9e-06	0.00102	0.593
94	JASPAR2018_CORE_vertebrates_non-redundant.meme	MA0825.1	MNT	RVCACGTGMH	9.98e-06	0.00116	0.67
95	JASPAR2018_CORE_vertebrates_non-redundant.meme	MA0599.1	KLF5	GCCCCDCCCH	2.69e-06	0.00146	0.843
96	JASPAR2018_CORE_vertebrates_non-redundant.meme	MA1111.1	NR2F2	NAAAGGTCANR	3.79e-06	0.0016	0.925
97	JASPAR2018_CORE_vertebrates_non-redundant.meme	MA0698.1	ZBTB18	NATCCAGATGTKB	7.05e-06	0.00161	0.934
98	JASPAR2018_CORE_vertebrates_non-redundant.meme	MA0690.1	TBX21	AAGGTGTGAA	8.05e-06	0.00219	1.27
99	JASPAR2018_CORE_vertebrates_non-redundant.meme	MA0471.1	E2F6	RGGCGGGARRV	6.18e-06	0.00226	1.31
100	JASPAR2018_CORE_vertebrates_non-redundant.meme	MA0259.1	ARNT::HIF1A	VBACGTGC	1.41e-05	0.00229	1.32
101	JASPAR2018_CORE_vertebrates_non-redundant.meme	MA0603.1	Arntl	NGTCACGTGH	1.95e-05	0.00238	1.38
102	JASPAR2018_CORE_vertebrates_non-redundant.meme	MA0626.1	Npas2	NSCACGTGTN	2.26e-05	0.00286	1.66
103	JASPAR2018_CORE_vertebrates_non-redundant.meme	MA0799.1	RFX4	NGTWRCCATGGYWACS	5.14e-05	0.00297	1.72
104	JASPAR2018_CORE_vertebrates_non-redundant.meme	MA0033.2	FOXL1	RTAAACA	7.53e-06	0.00356	2.06
105	JASPAR2018_CORE_vertebrates_non-redundant.meme	MA1106.1	HIF1A	SBACGTGCNN	3.46e-05	0.00377	2.18
106	JASPAR2018_CORE_vertebrates_non-redundant.meme	MA0505.1	Nr5a2	RAGTTCAAGGYCAGS	1.44e-05	0.00423	2.45
107	JASPAR2018_CORE_vertebrates_non-redundant.meme	MA0095.2	YY1	CAARATGGCBGC	1.85e-05	0.00497	2.88
108	JASPAR2018_CORE_vertebrates_non-redundant.meme	MA0004.1	Arnt	CACGTG	6.45e-05	0.00765	4.43
109	JASPAR2018_CORE_vertebrates_non-redundant.meme	MA0828.1	SREBF2(var.2)	ATCACGTGAY	0.000194	0.0085	4.92
110	JASPAR2018_CORE_vertebrates_non-redundant.meme	MA0602.1	Arid5a	SYAATATTGVDANH	2.37e-05	0.00878	5.08
111	JASPAR2018_CORE_vertebrates_non-redundant.meme	MA0664.1	MLXIPL	RTCACGTGAT	0.000114	0.0098	5.67
112	JASPAR2018_CORE_vertebrates_non-redundant.meme	MA0802.1	TBR1	AGGTGTGAAA	3.18e-05	0.00981	5.68
113	JASPAR2018_CORE_vertebrates_non-redundant.meme	MA0006.1	Ahr::Arnt	YGCGTG	4.8e-05	0.0127	7.37
114	JASPAR2018_CORE_vertebrates_non-redundant.meme	MA0517.1	STAT1::STAT2	THAGTTTCRKTTTCY	5.03e-05	0.0132	7.64
115	JASPAR2018_CORE_vertebrates_non-redundant.meme	MA0058.3	MAX	AVCACGTGNY	0.000123	0.0136	7.87
116	JASPAR2018_CORE_vertebrates_non-redundant.meme	MA0093.2	USF1	VYCAYGTGACC	6.67e-05	0.0143	8.28

## Sheet: Lung
Rank	Motif DB	Motif ID	TF	Consensus	P-value	Adjusted P-value	E-value
1	JASPAR2018_CORE_vertebrates_non-redundant.meme	MA1125.1	ZNF384	DNWMAAAAAAAA	3.33e-255	6.38e-252	3.69e-249
2	JASPAR2018_CORE_vertebrates_non-redundant.meme	MA0719.1	RHOXF1	NTRATCCN	2.33e-145	4.41e-142	2.55e-139
3	JASPAR2018_CORE_vertebrates_non-redundant.meme	MA0478.1	FOSL2	KRRTGASTCAB	1.29e-121	1.04e-118	6.05e-116
4	JASPAR2018_CORE_vertebrates_non-redundant.meme	MA0050.2	IRF1	NTTYASTTTCACTTTCDBTTT	6.36e-113	6.67e-110	3.86e-107
5	JASPAR2018_CORE_vertebrates_non-redundant.meme	MA0497.1	MEF2C	DDDCYAAAAATAGMW	4.51e-109	4.82e-106	2.79e-103
6	JASPAR2018_CORE_vertebrates_non-redundant.meme	MA0801.1	MGA	AGGTGTGA	1.34e-106	1.44e-103	8.32e-101
7	JASPAR2018_CORE_vertebrates_non-redundant.meme	MA0682.1	Pitx1	YTAATCCH	9.09e-103	1.24e-99	7.2e-97
8	JASPAR2018_CORE_vertebrates_non-redundant.meme	MA0824.1	ID4	NRCACCTGBH	2.62e-94	3.22e-91	1.86e-88
9	JASPAR2018_CORE_vertebrates_non-redundant.meme	MA0019.1	Ddit3::Cebpa	VNRTGCAATMCC	3.54e-93	3.75e-90	2.17e-87
10	JASPAR2018_CORE_vertebrates_non-redundant.meme	MA0146.2	Zfx	SSSGCCBVGGCCTS	5.08e-92	5.84e-89	3.38e-86
11	JASPAR2018_CORE_vertebrates_non-redundant.meme	MA0830.1	TCF4	HRCACCTGBN	5.44e-92	7.38e-89	4.27e-86
12	JASPAR2018_CORE_vertebrates_non-redundant.meme	MA0814.1	TFAP2C(var.2)	HGCCTSAGGCD	2.08e-88	2.46e-85	1.42e-82
13	JASPAR2018_CORE_vertebrates_non-redundant.meme	MA0041.1	Foxd3	GWWTGTTTDTTT	2.48e-78	3.24e-75	1.88e-72
14	JASPAR2018_CORE_vertebrates_non-redundant.meme	MA0728.1	Nr2f6(var.2)	RAGGTCAARAGGTCA	2.18e-76	5.54e-74	3.21e-71
15	JASPAR2018_CORE_vertebrates_non-redundant.meme	MA0711.1	OTX1	HTAATCCS	3.67e-76	3.18e-73	1.84e-70
16	JASPAR2018_CORE_vertebrates_non-redundant.meme	MA0522.2	TCF3	HRCACCTGBN	4.38e-74	6.25e-71	3.62e-68
17	JASPAR2018_CORE_vertebrates_non-redundant.meme	MA0528.1	ZNF263	GGAGGAGGRRGRGGRGGRRGR	5.12e-71	7.76e-68	4.49e-65
18	JASPAR2018_CORE_vertebrates_non-redundant.meme	MA0806.1	TBX4	AGGTGTGA	5.68e-70	6.67e-67	3.86e-64
19	JASPAR2018_CORE_vertebrates_non-redundant.meme	MA0807.1	TBX5	AGGTGTKA	2.2e-68	3.24e-65	1.88e-62
20	JASPAR2018_CORE_vertebrates_non-redundant.meme	MA0017.2	NR2F1	CARAGGTCAMVNG	2.89e-67	2.98e-64	1.73e-61
21	JASPAR2018_CORE_vertebrates_non-redundant.meme	MA0516.1	SP2	GYCCCGCCYCYBSSS	4.71e-67	5.24e-64	3.03e-61
22	JASPAR2018_CORE_vertebrates_non-redundant.meme	MA0014.3	PAX5	RRGCGTGACCNN	2.56e-63	1.69e-60	9.76e-58
23	JASPAR2018_CORE_vertebrates_non-redundant.meme	MA0803.1	TBX15	AGGTGTGA	3.17e-61	2.74e-58	1.59e-55
24	JASPAR2018_CORE_vertebrates_non-redundant.meme	MA0745.1	SNAI2	DRCAGGTGB	3.4e-57	4.92e-54	2.85e-51
25	JASPAR2018_CORE_vertebrates_non-redundant.meme	MA1107.1	KLF9	VSCCACACCCACH	2.27e-55	2.12e-52	1.23e-49
26	JASPAR2018_CORE_vertebrates_non-redundant.meme	MA0829.1	Srebf1(var.2)	ATCACGTGAY	1.2e-54	3.85e-52	2.23e-49
27	JASPAR2018_CORE_vertebrates_non-redundant.meme	MA0494.1	Nr1h3::Rxra	TGACCTNNAGTRACCYYDN	7.06e-50	5.02e-47	2.91e-44
28	JASPAR2018_CORE_vertebrates_non-redundant.meme	MA0483.1	Gfi1b	AAATCWCWGCH	5.47e-50	5.3e-47	3.07e-44
29	JASPAR2018_CORE_vertebrates_non-redundant.meme	MA0712.1	OTX2	YTAATCCB	2.3e-48	2.36e-45	1.37e-42
30	JASPAR2018_CORE_vertebrates_non-redundant.meme	MA1099.1	Hes1	SVCACGYGHN	1.64e-47	8.77e-45	5.08e-42
31	JASPAR2018_CORE_vertebrates_non-redundant.meme	MA0079.3	SP1	GCCCCKCCCCC	2.63e-47	3.02e-44	1.75e-41
32	JASPAR2018_CORE_vertebrates_non-redundant.meme	MA0805.1	TBX1	AGGTGTGA	5.22e-47	4.11e-44	2.38e-41
33	JASPAR2018_CORE_vertebrates_non-redundant.meme	MA0018.3	CREB1	NVTGACGTCABN	2.98e-45	1.42e-42	8.2e-40
34	JASPAR2018_CORE_vertebrates_non-redundant.meme	MA0714.1	PITX3	NYTAATCCC	1.62e-45	1.79e-42	1.04e-39
35	JASPAR2018_CORE_vertebrates_non-redundant.meme	MA0103.3	ZEB1	SNCACCTGSVN	9.77e-45	1.35e-41	7.79e-39
36	JASPAR2018_CORE_vertebrates_non-redundant.meme	MA0859.1	Rarg	RAGGTCAAAAGGTCAW	1.13e-43	1.78e-41	1.03e-38
37	JASPAR2018_CORE_vertebrates_non-redundant.meme	MA0595.1	SREBF1	VTCACCCCAY	4.41e-43	3.26e-40	1.89e-37
38	JASPAR2018_CORE_vertebrates_non-redundant.meme	MA0693.2	VDR	YRRGTTCA	2.06e-41	3e-38	1.74e-35
39	JASPAR2018_CORE_vertebrates_non-redundant.meme	MA0513.1	SMAD2::SMAD3::SMAD4	CTGTCTGDCACCT	3.93e-40	3.64e-37	2.11e-34
40	JASPAR2018_CORE_vertebrates_non-redundant.meme	MA0111.1	Spz1	AGGGTWWCAGC	1.01e-38	9.34e-36	5.41e-33
41	JASPAR2018_CORE_vertebrates_non-redundant.meme	MA0738.1	HIC2	RTGCCCRSB	6.72e-39	1.08e-35	6.28e-33
42	JASPAR2018_CORE_vertebrates_non-redundant.meme	MA0857.1	Rarb	AAAGGTCAAAAGGTCA	1.44e-36	1.91e-34	1.11e-31
43	JASPAR2018_CORE_vertebrates_non-redundant.meme	MA0039.3	KLF4	MCACACCCTNN	9.39e-36	8.97e-33	5.19e-30
44	JASPAR2018_CORE_vertebrates_non-redundant.meme	MA0820.1	FIGLA	WMCACCTGKW	3.2e-35	4.63e-32	2.68e-29
45	JASPAR2018_CORE_vertebrates_non-redundant.meme	MA1114.1	PBX3	NNNTGAGTGACAGGBNN	1.68e-34	1.38e-31	7.98e-29
46	JASPAR2018_CORE_vertebrates_non-redundant.meme	MA0846.1	FOXC2	WAWGTAAACAWW	7.34e-34	7.52e-31	4.36e-28
47	JASPAR2018_CORE_vertebrates_non-redundant.meme	MA0747.1	SP8	RCCACGCCCMCY	3.77e-30	3.77e-27	2.18e-24
48	JASPAR2018_CORE_vertebrates_non-redundant.meme	MA0493.1	Klf1	RRCCACACCCW	7.5e-30	5.54e-27	3.21e-24
49	JASPAR2018_CORE_vertebrates_non-redundant.meme	MA0831.2	TFE3	CACGTGAY	3.25e-29	1.63e-26	9.42e-24
50	JASPAR2018_CORE_vertebrates_non-redundant.meme	MA0596.1	SREBF2	RTGGGGTGAY	6.26e-29	4.29e-26	2.48e-23
51	JASPAR2018_CORE_vertebrates_non-redundant.meme	MA0649.1	HEY2	GRCACGTGYC	1.18e-26	3.01e-24	1.74e-21
52	JASPAR2018_CORE_vertebrates_non-redundant.meme	MA0673.1	NKX2-8	VCACTTSAV	4.56e-27	7.2e-24	4.17e-21
53	JASPAR2018_CORE_vertebrates_non-redundant.meme	MA0871.1	TFEC	RTCACRTGAB	1.72e-24	1.15e-21	6.67e-19
54	JASPAR2018_CORE_vertebrates_non-redundant.meme	MA0073.1	RREB1	CCCCMAAMCAMCCMCMMMCV	2e-23	4.61e-21	2.67e-18
55	JASPAR2018_CORE_vertebrates_non-redundant.meme	MA0692.1	TFEB	RYCACGTGAC	1.71e-23	7.6e-21	4.4e-18
56	JASPAR2018_CORE_vertebrates_non-redundant.meme	MA0160.1	NR4A2	AAGGTCAC	8.99e-24	1.36e-20	7.86e-18
57	JASPAR2018_CORE_vertebrates_non-redundant.meme	MA0131.2	HINFP	CARCGTCCGCKN	9.14e-23	2.38e-20	1.38e-17
58	JASPAR2018_CORE_vertebrates_non-redundant.meme	MA0690.1	TBX21	AAGGTGTGAA	5.19e-23	3.12e-20	1.8e-17
59	JASPAR2018_CORE_vertebrates_non-redundant.meme	MA1142.1	FOSL1::JUND	NRTGACTCAT	7.64e-23	7.65e-20	4.43e-17
60	JASPAR2018_CORE_vertebrates_non-redundant.meme	MA0746.1	SP3	VCCACGCCCMC	6.58e-23	7.86e-20	4.55e-17
61	JASPAR2018_CORE_vertebrates_non-redundant.meme	MA0149.1	EWSR1-FLI1	GGAAGGAAGGAAGGAAGG	1.75e-21	1.59e-19	9.23e-17
62	JASPAR2018_CORE_vertebrates_non-redundant.meme	MA0003.3	TFAP2A	HGCCYSAGGCD	3.67e-22	3.75e-19	2.17e-16
63	JASPAR2018_CORE_vertebrates_non-redundant.meme	MA0471.1	E2F6	RGGCGGGARRV	5.24e-22	4.46e-19	2.58e-16
64	JASPAR2018_CORE_vertebrates_non-redundant.meme	MA0259.1	ARNT::HIF1A	VBACGTGC	2.01e-21	6.75e-19	3.91e-16
65	JASPAR2018_CORE_vertebrates_non-redundant.meme	MA0778.1	NFKB2	AGGGGAWTCCCCY	3.81e-21	1.14e-18	6.62e-16
66	JASPAR2018_CORE_vertebrates_non-redundant.meme	MA0823.1	HEY1	GRCACGTGCC	1.55e-19	2.68e-17	1.55e-14
67	JASPAR2018_CORE_vertebrates_non-redundant.meme	MA0802.1	TBR1	AGGTGTGAAA	1.3e-19	8.43e-17	4.88e-14
68	JASPAR2018_CORE_vertebrates_non-redundant.meme	MA0821.1	HES5	YGGCACGTGCCR	1.68e-18	1.08e-16	6.23e-14
69	JASPAR2018_CORE_vertebrates_non-redundant.meme	MA0822.1	HES7	YGGCACGTGCCR	1.68e-18	1.29e-16	7.49e-14
70	JASPAR2018_CORE_vertebrates_non-redundant.meme	MA0742.1	Klf12	GRCCACGCCCWHHWH	5.17e-19	1.63e-16	9.42e-14
71	JASPAR2018_CORE_vertebrates_non-redundant.meme	MA0739.1	Hic1	RTGCCAACY	3.72e-19	5.17e-16	2.99e-13
72	JASPAR2018_CORE_vertebrates_non-redundant.meme	MA0032.2	FOXC1	WAWGTAAAYAW	2.98e-18	2.48e-15	1.43e-12
73	JASPAR2018_CORE_vertebrates_non-redundant.meme	MA0632.1	Tcfl5	NBCDCGHGVN	9.16e-17	2.68e-14	1.55e-11
74	JASPAR2018_CORE_vertebrates_non-redundant.meme	MA0616.1	Hes2	NNNNGRCACGTGM	2.12e-16	1.06e-13	6.12e-11
75	JASPAR2018_CORE_vertebrates_non-redundant.meme	MA0095.2	YY1	CAARATGGCBGC	1.6e-15	9.48e-13	5.49e-10
76	JASPAR2018_CORE_vertebrates_non-redundant.meme	MA0845.1	FOXB1	WATGTAAATAT	2.03e-15	1.24e-12	7.19e-10
77	JASPAR2018_CORE_vertebrates_non-redundant.meme	MA0660.1	MEF2B	RCTAWAAATAGC	1.91e-14	3.27e-12	1.89e-09
78	JASPAR2018_CORE_vertebrates_non-redundant.meme	MA0773.1	MEF2D	DCTAWAAATAGM	2.7e-13	4.8e-11	2.78e-08
79	JASPAR2018_CORE_vertebrates_non-redundant.meme	MA0800.1	EOMES	RAGGTGTGAAAWN	3.63e-13	2.45e-10	1.42e-07
80	JASPAR2018_CORE_vertebrates_non-redundant.meme	MA0517.1	STAT1::STAT2	THAGTTTCRKTTTCY	6.29e-13	3.99e-10	2.31e-07
81	JASPAR2018_CORE_vertebrates_non-redundant.meme	MA1106.1	HIF1A	SBACGTGCNN	5.62e-12	1.07e-09	6.18e-07
82	JASPAR2018_CORE_vertebrates_non-redundant.meme	MA0861.1	TP73	DRCATGTCNNRACAYGYM	5.6e-12	1.15e-09	6.65e-07
83	JASPAR2018_CORE_vertebrates_non-redundant.meme	MA0093.2	USF1	VYCAYGTGACC	2.82e-12	1.2e-09	6.95e-07
84	JASPAR2018_CORE_vertebrates_non-redundant.meme	MA0626.1	Npas2	NSCACGTGTN	8.09e-12	1.68e-09	9.74e-07
85	JASPAR2018_CORE_vertebrates_non-redundant.meme	MA0004.1	Arnt	CACGTG	1.5e-11	2.57e-09	1.49e-06
86	JASPAR2018_CORE_vertebrates_non-redundant.meme	MA0636.1	BHLHE41	RTCACGTGAC	8.95e-11	5.55e-09	3.21e-06
87	JASPAR2018_CORE_vertebrates_non-redundant.meme	MA0740.1	KLF14	KRCCACGCCCMCYT	2.5e-11	7.11e-09	4.12e-06
88	JASPAR2018_CORE_vertebrates_non-redundant.meme	MA0825.1	MNT	RVCACGTGMH	4.29e-11	7.25e-09	4.2e-06
89	JASPAR2018_CORE_vertebrates_non-redundant.meme	MA0891.1	GSC2	NYTAATCCBH	3.05e-11	2.01e-08	1.16e-05
90	JASPAR2018_CORE_vertebrates_non-redundant.meme	MA0688.1	TBX2	DAGGTGTGAAA	2.62e-11	2.3e-08	1.33e-05
91	JASPAR2018_CORE_vertebrates_non-redundant.meme	MA0052.3	MEF2A	KCTAWAAATAGM	1.33e-10	3.58e-08	2.07e-05
92	JASPAR2018_CORE_vertebrates_non-redundant.meme	MA0464.2	BHLHE40	VKCACGTGMC	4.33e-10	4.85e-08	2.81e-05
93	JASPAR2018_CORE_vertebrates_non-redundant.meme	MA0006.1	Ahr::Arnt	YGCGTG	1.28e-10	5.73e-08	3.32e-05
94	JASPAR2018_CORE_vertebrates_non-redundant.meme	MA0698.1	ZBTB18	NATCCAGATGTKB	1.67e-10	7.91e-08	4.58e-05
95	JASPAR2018_CORE_vertebrates_non-redundant.meme	MA0102.3	CEBPA	ATTGCAYAAYH	3.17e-10	2.29e-07	0.000132
96	JASPAR2018_CORE_vertebrates_non-redundant.meme	MA0836.1	CEBPD	RTTRCGCAAY	2.41e-09	4.98e-07	0.000289
97	JASPAR2018_CORE_vertebrates_non-redundant.meme	MA0599.1	KLF5	GCCCCDCCCH	5.08e-10	5.05e-07	0.000293
98	JASPAR2018_CORE_vertebrates_non-redundant.meme	MA0058.3	MAX	AVCACGTGNY	3.05e-09	5.13e-07	0.000297
99	JASPAR2018_CORE_vertebrates_non-redundant.meme	MA0851.1	Foxj3	NDAADGTAAACAAANNM	1.33e-09	8.42e-07	0.000487
100	JASPAR2018_CORE_vertebrates_non-redundant.meme	MA0622.1	Mlxip	BCACGTGK	8.29e-09	1.41e-06	0.000816
101	JASPAR2018_CORE_vertebrates_non-redundant.meme	MA0617.1	Id2	RCACGTGR	8.29e-09	1.41e-06	0.000816
102	JASPAR2018_CORE_vertebrates_non-redundant.meme	MA0664.1	MLXIPL	RTCACGTGAT	1.26e-08	1.6e-06	0.000928
103	JASPAR2018_CORE_vertebrates_non-redundant.meme	MA0603.1	Arntl	NGTCACGTGH	1.14e-08	1.91e-06	0.00111
104	JASPAR2018_CORE_vertebrates_non-redundant.meme	MA1129.1	FOSL1::JUN(var.2)	ATGACGTCAT	2.33e-08	4.73e-06	0.00274
105	JASPAR2018_CORE_vertebrates_non-redundant.meme	MA0466.2	CEBPB	RTTRCGCAAY	3.48e-08	8.34e-06	0.00483
106	JASPAR2018_CORE_vertebrates_non-redundant.meme	MA0150.2	Nfe2l2	CASNATGACTCAGCA	2.89e-08	1.03e-05	0.00598
107	JASPAR2018_CORE_vertebrates_non-redundant.meme	MA0837.1	CEBPE	VTTRCGCAAY	3.48e-08	1.27e-05	0.00735
108	JASPAR2018_CORE_vertebrates_non-redundant.meme	MA0819.1	CLOCK	AACACGTGTH	6.35e-08	1.4e-05	0.00813
109	JASPAR2018_CORE_vertebrates_non-redundant.meme	MA0130.1	ZNF354C	MTCCAC	1.1e-08	1.86e-05	0.0107
110	JASPAR2018_CORE_vertebrates_non-redundant.meme	MA1124.1	ZNF24	CATTCATTCATTC	1.47e-07	3.76e-05	0.0218
111	JASPAR2018_CORE_vertebrates_non-redundant.meme	MA0602.1	Arid5a	SYAATATTGVDANH	1.71e-07	0.000105	0.061
112	JASPAR2018_CORE_vertebrates_non-redundant.meme	MA0477.1	FOSL1	RRTGASTCAKV	4.07e-07	0.000114	0.0662
113	JASPAR2018_CORE_vertebrates_non-redundant.meme	MA0147.3	MYC	NNCCACGTGCNB	3.92e-07	0.000125	0.0722
114	JASPAR2018_CORE_vertebrates_non-redundant.meme	MA1108.1	MXI1	NVVCCACGTGSNB	6.13e-07	0.000137	0.0795
115	JASPAR2018_CORE_vertebrates_non-redundant.meme	MA1101.1	BACH2	NMTGACTCAGCANH	3.11e-07	0.000148	0.0856
116	JASPAR2018_CORE_vertebrates_non-redundant.meme	MA0601.1	Arid3b	ATATTAATWAN	5.15e-07	0.000464	0.269
117	JASPAR2018_CORE_vertebrates_non-redundant.meme	MA0499.1	Myod1	NSCAGCTGYYNYB	5.54e-07	0.000493	0.285
118	JASPAR2018_CORE_vertebrates_non-redundant.meme	MA0828.1	SREBF2(var.2)	ATCACGTGAY	8.58e-06	0.000729	0.422
119	JASPAR2018_CORE_vertebrates_non-redundant.meme	MA0620.2	MITF	NNDRGTCACGTGACYHNN	3.61e-06	0.00076	0.44
120	JASPAR2018_CORE_vertebrates_non-redundant.meme	MA0838.1	CEBPG	ATTRCGCAAY	6.44e-06	0.000888	0.514
121	JASPAR2018_CORE_vertebrates_non-redundant.meme	MA0879.1	Dlx1	NVTAATTANN	1.26e-06	0.00127	0.737
122	JASPAR2018_CORE_vertebrates_non-redundant.meme	MA0048.2	NHLH1	CGCAGCTGCK	2.5e-06	0.0014	0.813
123	JASPAR2018_CORE_vertebrates_non-redundant.meme	MA0505.1	Nr5a2	RAGTTCAAGGYCAGS	5.1e-06	0.00272	1.57
124	JASPAR2018_CORE_vertebrates_non-redundant.meme	MA0799.1	RFX4	NGTWRCCATGGYWACS	2.1e-05	0.00353	2.04
125	JASPAR2018_CORE_vertebrates_non-redundant.meme	MA0470.1	E2F4	GGGCGGGAARN	2.3e-05	0.00543	3.15
126	JASPAR2018_CORE_vertebrates_non-redundant.meme	MA1100.1	ASCL1	VSAGCAGCTGSNN	1.18e-05	0.00918	5.31
127	JASPAR2018_CORE_vertebrates_non-redundant.meme	MA0729.1	RARA	GAGGTCAAAAGGTCAAKB	0.00096	0.0105	6.08
128	JASPAR2018_CORE_vertebrates_non-redundant.meme	MA0790.1	POU4F1	ATGMATAATTAATG	2.24e-05	0.0112	6.5
129	JASPAR2018_CORE_vertebrates_non-redundant.meme	MA0059.1	MAX::MYC	RASCACGTGGT	8.03e-05	0.0134	7.76
130	JASPAR2018_CORE_vertebrates_non-redundant.meme	MA0663.1	MLX	RTCACGTGAT	0.000265	0.0168	9.73

## Sheet: Spleen
Rank	Motif DB	Motif ID	TF	Consensus	P-value	Adjusted P-value	E-value
1	JASPAR2018_CORE_vertebrates_non-redundant.meme	MA1125.1	ZNF384	DNWMAAAAAAAA	1.46e-118	1.13e-115	6.54e-113
2	JASPAR2018_CORE_vertebrates_non-redundant.meme	MA0719.1	RHOXF1	NTRATCCN	7.74e-58	6.05e-55	3.5e-52
3	JASPAR2018_CORE_vertebrates_non-redundant.meme	MA0146.2	Zfx	SSSGCCBVGGCCTS	6.8e-57	3.06e-54	1.77e-51
4	JASPAR2018_CORE_vertebrates_non-redundant.meme	MA0497.1	MEF2C	DDDCYAAAAATAGMW	1.61e-54	6.86e-52	3.97e-49
5	JASPAR2018_CORE_vertebrates_non-redundant.meme	MA0801.1	MGA	AGGTGTGA	1.66e-53	7.2e-51	4.17e-48
6	JASPAR2018_CORE_vertebrates_non-redundant.meme	MA0682.1	Pitx1	YTAATCCH	4.79e-50	2.59e-47	1.5e-44
7	JASPAR2018_CORE_vertebrates_non-redundant.meme	MA0050.2	IRF1	NTTYASTTTCACTTTCDBTTT	1.77e-46	6.91e-44	4e-41
8	JASPAR2018_CORE_vertebrates_non-redundant.meme	MA0019.1	Ddit3::Cebpa	VNRTGCAATMCC	8.15e-44	3.44e-41	1.99e-38
9	JASPAR2018_CORE_vertebrates_non-redundant.meme	MA0814.1	TFAP2C(var.2)	HGCCTSAGGCD	1.61e-40	7.83e-38	4.53e-35
10	JASPAR2018_CORE_vertebrates_non-redundant.meme	MA0017.2	NR2F1	CARAGGTCAMVNG	5.3e-39	2.27e-36	1.31e-33
11	JASPAR2018_CORE_vertebrates_non-redundant.meme	MA0014.3	PAX5	RRGCGTGACCNN	3.13e-37	7.39e-35	4.28e-32
12	JASPAR2018_CORE_vertebrates_non-redundant.meme	MA1107.1	KLF9	VSCCACACCCACH	3.97e-37	1.63e-34	9.45e-32
13	JASPAR2018_CORE_vertebrates_non-redundant.meme	MA0806.1	TBX4	AGGTGTGA	6.88e-37	3.46e-34	2e-31
14	JASPAR2018_CORE_vertebrates_non-redundant.meme	MA0478.1	FOSL2	KRRTGASTCAB	4.24e-36	1.01e-33	5.84e-31
15	JASPAR2018_CORE_vertebrates_non-redundant.meme	MA0711.1	OTX1	HTAATCCS	4.91e-34	1.64e-31	9.47e-29
16	JASPAR2018_CORE_vertebrates_non-redundant.meme	MA0824.1	ID4	NRCACCTGBH	6.59e-34	3.68e-31	2.13e-28
17	JASPAR2018_CORE_vertebrates_non-redundant.meme	MA0803.1	TBX15	AGGTGTGA	4.64e-33	1.63e-30	9.41e-28
18	JASPAR2018_CORE_vertebrates_non-redundant.meme	MA0830.1	TCF4	HRCACCTGBN	1.28e-31	7.92e-29	4.58e-26
19	JASPAR2018_CORE_vertebrates_non-redundant.meme	MA0041.1	Foxd3	GWWTGTTTDTTT	4.17e-31	2.2e-28	1.27e-25
20	JASPAR2018_CORE_vertebrates_non-redundant.meme	MA0516.1	SP2	GYCCCGCCYCYBSSS	9e-31	4.05e-28	2.34e-25
21	JASPAR2018_CORE_vertebrates_non-redundant.meme	MA0693.2	VDR	YRRGTTCA	9.75e-31	6.4e-28	3.7e-25
22	JASPAR2018_CORE_vertebrates_non-redundant.meme	MA0807.1	TBX5	AGGTGTKA	1.05e-29	6.98e-27	4.04e-24
23	JASPAR2018_CORE_vertebrates_non-redundant.meme	MA0805.1	TBX1	AGGTGTGA	1.62e-28	5.86e-26	3.39e-23
24	JASPAR2018_CORE_vertebrates_non-redundant.meme	MA0728.1	Nr2f6(var.2)	RAGGTCAARAGGTCA	1.38e-24	6.9e-23	4e-20
25	JASPAR2018_CORE_vertebrates_non-redundant.meme	MA0522.2	TCF3	HRCACCTGBN	6.26e-25	4.08e-22	2.36e-19
26	JASPAR2018_CORE_vertebrates_non-redundant.meme	MA0079.3	SP1	GCCCCKCCCCC	8e-25	4.13e-22	2.39e-19
27	JASPAR2018_CORE_vertebrates_non-redundant.meme	MA0018.3	CREB1	NVTGACGTCABN	6.12e-24	1.24e-21	7.19e-19
28	JASPAR2018_CORE_vertebrates_non-redundant.meme	MA0494.1	Nr1h3::Rxra	TGACCTNNAGTRACCYYDN	4.86e-24	1.52e-21	8.78e-19
29	JASPAR2018_CORE_vertebrates_non-redundant.meme	MA0111.1	Spz1	AGGGTWWCAGC	8.31e-24	3.47e-21	2.01e-18
30	JASPAR2018_CORE_vertebrates_non-redundant.meme	MA0039.3	KLF4	MCACACCCTNN	1.13e-23	5e-21	2.9e-18
31	JASPAR2018_CORE_vertebrates_non-redundant.meme	MA0829.1	Srebf1(var.2)	ATCACGTGAY	1.96e-22	2.11e-20	1.22e-17
32	JASPAR2018_CORE_vertebrates_non-redundant.meme	MA0493.1	Klf1	RRCCACACCCW	5.9e-23	2.33e-20	1.35e-17
33	JASPAR2018_CORE_vertebrates_non-redundant.meme	MA0859.1	Rarg	RAGGTCAAAAGGTCAW	1.34e-21	6.32e-20	3.66e-17
34	JASPAR2018_CORE_vertebrates_non-redundant.meme	MA0742.1	Klf12	GRCCACGCCCWHHWH	9.33e-22	1.15e-19	6.64e-17
35	JASPAR2018_CORE_vertebrates_non-redundant.meme	MA0747.1	SP8	RCCACGCCCMCY	2.44e-22	1.17e-19	6.75e-17
36	JASPAR2018_CORE_vertebrates_non-redundant.meme	MA0714.1	PITX3	NYTAATCCC	5.06e-21	2.29e-18	1.32e-15
37	JASPAR2018_CORE_vertebrates_non-redundant.meme	MA0103.3	ZEB1	SNCACCTGSVN	4.81e-21	3.09e-18	1.79e-15
38	JASPAR2018_CORE_vertebrates_non-redundant.meme	MA0745.1	SNAI2	DRCAGGTGB	2.1e-20	1.48e-17	8.56e-15
39	JASPAR2018_CORE_vertebrates_non-redundant.meme	MA1099.1	Hes1	SVCACGYGHN	1.57e-19	2.52e-17	1.46e-14
40	JASPAR2018_CORE_vertebrates_non-redundant.meme	MA0131.2	HINFP	CARCGTCCGCKN	7.02e-19	5.83e-17	3.38e-14
41	JASPAR2018_CORE_vertebrates_non-redundant.meme	MA0513.1	SMAD2::SMAD3::SMAD4	CTGTCTGDCACCT	1.5e-19	6.36e-17	3.68e-14
42	JASPAR2018_CORE_vertebrates_non-redundant.meme	MA0595.1	SREBF1	VTCACCCCAY	2.83e-19	8.87e-17	5.14e-14
43	JASPAR2018_CORE_vertebrates_non-redundant.meme	MA0528.1	ZNF263	GGAGGAGGRRGRGGRGGRRGR	1.18e-18	7.72e-16	4.47e-13
44	JASPAR2018_CORE_vertebrates_non-redundant.meme	MA0712.1	OTX2	YTAATCCB	3.52e-18	1.52e-15	8.79e-13
45	JASPAR2018_CORE_vertebrates_non-redundant.meme	MA1114.1	PBX3	NNNTGAGTGACAGGBNN	3.64e-17	1.3e-14	7.54e-12
46	JASPAR2018_CORE_vertebrates_non-redundant.meme	MA0857.1	Rarb	AAAGGTCAAAAGGTCA	7.42e-16	2.75e-14	1.59e-11
47	JASPAR2018_CORE_vertebrates_non-redundant.meme	MA0820.1	FIGLA	WMCACCTGKW	1.9e-16	1.3e-13	7.5e-11
48	JASPAR2018_CORE_vertebrates_non-redundant.meme	MA0483.1	Gfi1b	AAATCWCWGCH	3.42e-16	1.54e-13	8.92e-11
49	JASPAR2018_CORE_vertebrates_non-redundant.meme	MA0746.1	SP3	VCCACGCCCMC	5.08e-16	2.89e-13	1.68e-10
50	JASPAR2018_CORE_vertebrates_non-redundant.meme	MA0802.1	TBR1	AGGTGTGAAA	1.1e-14	3.22e-12	1.87e-09
51	JASPAR2018_CORE_vertebrates_non-redundant.meme	MA0690.1	TBX21	AAGGTGTGAA	6.45e-14	1.74e-11	1.01e-08
52	JASPAR2018_CORE_vertebrates_non-redundant.meme	MA0740.1	KLF14	KRCCACGCCCMCYT	1.58e-13	1.85e-11	1.07e-08
53	JASPAR2018_CORE_vertebrates_non-redundant.meme	MA0846.1	FOXC2	WAWGTAAACAWW	9.61e-14	4.54e-11	2.63e-08
54	JASPAR2018_CORE_vertebrates_non-redundant.meme	MA0778.1	NFKB2	AGGGGAWTCCCCY	4.79e-13	6.37e-11	3.69e-08
55	JASPAR2018_CORE_vertebrates_non-redundant.meme	MA0596.1	SREBF2	RTGGGGTGAY	3.68e-13	1.17e-10	6.8e-08
56	JASPAR2018_CORE_vertebrates_non-redundant.meme	MA0831.2	TFE3	CACGTGAY	1.01e-12	2.31e-10	1.34e-07
57	JASPAR2018_CORE_vertebrates_non-redundant.meme	MA1142.1	FOSL1::JUND	NRTGACTCAT	1.17e-12	5.44e-10	3.15e-07
58	JASPAR2018_CORE_vertebrates_non-redundant.meme	MA0160.1	NR4A2	AAGGTCAC	3.97e-12	2.72e-09	1.57e-06
59	JASPAR2018_CORE_vertebrates_non-redundant.meme	MA0738.1	HIC2	RTGCCCRSB	7.02e-12	5.68e-09	3.29e-06
60	JASPAR2018_CORE_vertebrates_non-redundant.meme	MA0660.1	MEF2B	RCTAWAAATAGC	1.66e-10	8.79e-09	5.09e-06
61	JASPAR2018_CORE_vertebrates_non-redundant.meme	MA0003.3	TFAP2A	HGCCYSAGGCD	5.26e-11	2.41e-08	1.39e-05
62	JASPAR2018_CORE_vertebrates_non-redundant.meme	MA0632.1	Tcfl5	NBCDCGHGVN	7.09e-10	8.73e-08	5.05e-05
63	JASPAR2018_CORE_vertebrates_non-redundant.meme	MA0673.1	NKX2-8	VCACTTSAV	1.74e-10	1.26e-07	7.29e-05
64	JASPAR2018_CORE_vertebrates_non-redundant.meme	MA0149.1	EWSR1-FLI1	GGAAGGAAGGAAGGAAGG	7.45e-09	1.79e-07	0.000104
65	JASPAR2018_CORE_vertebrates_non-redundant.meme	MA0032.2	FOXC1	WAWGTAAAYAW	8.48e-10	3.09e-07	0.000179
66	JASPAR2018_CORE_vertebrates_non-redundant.meme	MA0688.1	TBX2	DAGGTGTGAAA	2.98e-09	1.31e-06	0.000756
67	JASPAR2018_CORE_vertebrates_non-redundant.meme	MA0073.1	RREB1	CCCCMAAMCAMCCMCMMMCV	2.06e-08	1.69e-06	0.000976
68	JASPAR2018_CORE_vertebrates_non-redundant.meme	MA0488.1	JUN	DDRATGATGTCAT	1.2e-08	1.77e-06	0.00102
69	JASPAR2018_CORE_vertebrates_non-redundant.meme	MA0822.1	HES7	YGGCACGTGCCR	2.01e-07	3.22e-06	0.00186
70	JASPAR2018_CORE_vertebrates_non-redundant.meme	MA0471.1	E2F6	RGGCGGGARRV	1.78e-08	6.51e-06	0.00377
71	JASPAR2018_CORE_vertebrates_non-redundant.meme	MA0130.1	ZNF354C	MTCCAC	8.65e-09	7.33e-06	0.00424
72	JASPAR2018_CORE_vertebrates_non-redundant.meme	MA0773.1	MEF2D	DCTAWAAATAGM	1.58e-07	7.74e-06	0.00448
73	JASPAR2018_CORE_vertebrates_non-redundant.meme	MA0845.1	FOXB1	WATGTAAATAT	4.53e-08	1.25e-05	0.00724
74	JASPAR2018_CORE_vertebrates_non-redundant.meme	MA0821.1	HES5	YGGCACGTGCCR	8.49e-07	1.44e-05	0.00836
75	JASPAR2018_CORE_vertebrates_non-redundant.meme	MA0599.1	KLF5	GCCCCDCCCH	3.02e-08	1.45e-05	0.00837
76	JASPAR2018_CORE_vertebrates_non-redundant.meme	MA0603.1	Arntl	NGTCACGTGH	2.01e-07	1.81e-05	0.0105
77	JASPAR2018_CORE_vertebrates_non-redundant.meme	MA0692.1	TFEB	RYCACGTGAC	1.13e-07	2.17e-05	0.0125
78	JASPAR2018_CORE_vertebrates_non-redundant.meme	MA0891.1	GSC2	NYTAATCCBH	8.24e-08	2.49e-05	0.0144
79	JASPAR2018_CORE_vertebrates_non-redundant.meme	MA0823.1	HEY1	GRCACGTGCC	4.6e-07	3.54e-05	0.0205
80	JASPAR2018_CORE_vertebrates_non-redundant.meme	MA0616.1	Hes2	NNNNGRCACGTGM	4.6e-07	0.000108	0.0623
81	JASPAR2018_CORE_vertebrates_non-redundant.meme	MA0871.1	TFEC	RTCACRTGAB	4.76e-07	0.00014	0.081
82	JASPAR2018_CORE_vertebrates_non-redundant.meme	MA0095.2	YY1	CAARATGGCBGC	5.51e-07	0.00014	0.081
83	JASPAR2018_CORE_vertebrates_non-redundant.meme	MA0052.3	MEF2A	KCTAWAAATAGM	1.58e-06	0.000156	0.0904
84	JASPAR2018_CORE_vertebrates_non-redundant.meme	MA0649.1	HEY2	GRCACGTGYC	2.35e-06	0.000224	0.13
85	JASPAR2018_CORE_vertebrates_non-redundant.meme	MA0828.1	SREBF2(var.2)	ATCACGTGAY	5.64e-06	0.000248	0.144
86	JASPAR2018_CORE_vertebrates_non-redundant.meme	MA0636.1	BHLHE41	RTCACGTGAC	1.43e-05	0.000286	0.166
87	JASPAR2018_CORE_vertebrates_non-redundant.meme	MA0687.1	SPIC	HAAAAGVGGAAGTA	9.35e-07	0.000305	0.176
88	JASPAR2018_CORE_vertebrates_non-redundant.meme	MA0626.1	Npas2	NSCACGTGTN	2.79e-06	0.000355	0.205
89	JASPAR2018_CORE_vertebrates_non-redundant.meme	MA0861.1	TP73	DRCATGTCNNRACAYGYM	7.1e-06	0.000476	0.275
90	JASPAR2018_CORE_vertebrates_non-redundant.meme	MA0800.1	EOMES	RAGGTGTGAAAWN	2.08e-06	0.000578	0.335
91	JASPAR2018_CORE_vertebrates_non-redundant.meme	MA0464.2	BHLHE40	VKCACGTGMC	1.09e-05	0.000597	0.346
92	JASPAR2018_CORE_vertebrates_non-redundant.meme	MA0879.1	Dlx1	NVTAATTANN	1.57e-06	0.000823	0.477
93	JASPAR2018_CORE_vertebrates_non-redundant.meme	MA0836.1	CEBPD	RTTRCGCAAY	9.5e-06	0.00109	0.632
94	JASPAR2018_CORE_vertebrates_non-redundant.meme	MA0838.1	CEBPG	ATTRCGCAAY	3.04e-05	0.00191	1.11
95	JASPAR2018_CORE_vertebrates_non-redundant.meme	MA0102.3	CEBPA	ATTGCAYAAYH	5.43e-06	0.00201	1.16
96	JASPAR2018_CORE_vertebrates_non-redundant.meme	MA0601.1	Arid3b	ATATTAATWAN	5.2e-06	0.00227	1.32
97	JASPAR2018_CORE_vertebrates_non-redundant.meme	MA0837.1	CEBPE	VTTRCGCAAY	1.51e-05	0.00277	1.61
98	JASPAR2018_CORE_vertebrates_non-redundant.meme	MA0093.2	USF1	VYCAYGTGACC	1.54e-05	0.00308	1.78
99	JASPAR2018_CORE_vertebrates_non-redundant.meme	MA0466.2	CEBPB	RTTRCGCAAY	2.37e-05	0.00317	1.83
100	JASPAR2018_CORE_vertebrates_non-redundant.meme	MA0492.1	JUND(var.2)	DDDRATGABGTCATN	2.5e-05	0.00344	1.99
101	JASPAR2018_CORE_vertebrates_non-redundant.meme	MA0851.1	Foxj3	NDAADGTAAACAAANNM	1.25e-05	0.00363	2.1
102	JASPAR2018_CORE_vertebrates_non-redundant.meme	MA0004.1	Arnt	CACGTG	4.49e-05	0.00444	2.57
103	JASPAR2018_CORE_vertebrates_non-redundant.meme	MA0664.1	MLXIPL	RTCACGTGAT	7.06e-05	0.00479	2.77
104	JASPAR2018_CORE_vertebrates_non-redundant.meme	MA0517.1	STAT1::STAT2	THAGTTTCRKTTTCY	2.13e-05	0.00588	3.4
105	JASPAR2018_CORE_vertebrates_non-redundant.meme	MA1106.1	HIF1A	SBACGTGCNN	7.24e-05	0.00714	4.14
106	JASPAR2018_CORE_vertebrates_non-redundant.meme	MA0259.1	ARNT::HIF1A	VBACGTGC	0.000102	0.0138	7.98

## Sheet: K562
Rank	Motif DB	Motif ID	TF	Consensus	P-value	Adjusted P-value	E-value
1	JASPAR2018_CORE_vertebrates_non-redundant.meme	MA1125.1	ZNF384	DNWMAAAAAAAA	9.11e-138	7.45e-135	4.31e-132
2	JASPAR2018_CORE_vertebrates_non-redundant.meme	MA0497.1	MEF2C	DDDCYAAAAATAGMW	8.74e-112	4.24e-109	2.45e-106
3	JASPAR2018_CORE_vertebrates_non-redundant.meme	MA0773.1	MEF2D	DCTAWAAATAGM	2.44e-107	4.68e-105	2.71e-102
4	JASPAR2018_CORE_vertebrates_non-redundant.meme	MA0660.1	MEF2B	RCTAWAAATAGC	3.02e-105	5.71e-103	3.31e-100
5	JASPAR2018_CORE_vertebrates_non-redundant.meme	MA0017.2	NR2F1	CARAGGTCAMVNG	1.98e-89	9.2e-87	5.33e-84
6	JASPAR2018_CORE_vertebrates_non-redundant.meme	MA0146.2	Zfx	SSSGCCBVGGCCTS	2.42e-73	1.41e-70	8.19e-68
7	JASPAR2018_CORE_vertebrates_non-redundant.meme	MA0050.2	IRF1	NTTYASTTTCACTTTCDBTTT	4.77e-67	2e-64	1.16e-61
8	JASPAR2018_CORE_vertebrates_non-redundant.meme	MA0041.1	Foxd3	GWWTGTTTDTTT	6.99e-64	3.86e-61	2.24e-58
9	JASPAR2018_CORE_vertebrates_non-redundant.meme	MA0801.1	MGA	AGGTGTGA	1.9e-56	8.71e-54	5.04e-51
10	JASPAR2018_CORE_vertebrates_non-redundant.meme	MA0719.1	RHOXF1	NTRATCCN	1.72e-53	1.51e-50	8.74e-48
11	JASPAR2018_CORE_vertebrates_non-redundant.meme	MA0014.3	PAX5	RRGCGTGACCNN	1.92e-48	5.79e-46	3.35e-43
12	JASPAR2018_CORE_vertebrates_non-redundant.meme	MA0682.1	Pitx1	YTAATCCH	6.73e-48	3.72e-45	2.16e-42
13	JASPAR2018_CORE_vertebrates_non-redundant.meme	MA0693.2	VDR	YRRGTTCA	2.81e-47	1.93e-44	1.12e-41
14	JASPAR2018_CORE_vertebrates_non-redundant.meme	MA0019.1	Ddit3::Cebpa	VNRTGCAATMCC	1.36e-42	5.54e-40	3.21e-37
15	JASPAR2018_CORE_vertebrates_non-redundant.meme	MA0079.3	SP1	GCCCCKCCCCC	3.62e-40	2.39e-37	1.39e-34
16	JASPAR2018_CORE_vertebrates_non-redundant.meme	MA0516.1	SP2	GYCCCGCCYCYBSSS	4.89e-40	2.87e-37	1.66e-34
17	JASPAR2018_CORE_vertebrates_non-redundant.meme	MA0711.1	OTX1	HTAATCCS	3.22e-33	1.22e-30	7.07e-28
18	JASPAR2018_CORE_vertebrates_non-redundant.meme	MA0018.3	CREB1	NVTGACGTCABN	5.28e-30	1.04e-27	6.02e-25
19	JASPAR2018_CORE_vertebrates_non-redundant.meme	MA0831.2	TFE3	CACGTGAY	3.4e-29	9.55e-27	5.53e-24
20	JASPAR2018_CORE_vertebrates_non-redundant.meme	MA0596.1	SREBF2	RTGGGGTGAY	4.24e-29	1.33e-26	7.72e-24
21	JASPAR2018_CORE_vertebrates_non-redundant.meme	MA0814.1	TFAP2C(var.2)	HGCCTSAGGCD	2.88e-29	1.72e-26	9.96e-24
22	JASPAR2018_CORE_vertebrates_non-redundant.meme	MA0111.1	Spz1	AGGGTWWCAGC	1.15e-27	5.27e-25	3.05e-22
23	JASPAR2018_CORE_vertebrates_non-redundant.meme	MA1107.1	KLF9	VSCCACACCCACH	4.04e-27	1.46e-24	8.44e-22
24	JASPAR2018_CORE_vertebrates_non-redundant.meme	MA0052.3	MEF2A	KCTAWAAATAGM	2.97e-26	4.09e-24	2.37e-21
25	JASPAR2018_CORE_vertebrates_non-redundant.meme	MA0714.1	PITX3	NYTAATCCC	6.68e-26	3.32e-23	1.92e-20
26	JASPAR2018_CORE_vertebrates_non-redundant.meme	MA0829.1	Srebf1(var.2)	ATCACGTGAY	6.92e-25	7.48e-23	4.33e-20
27	JASPAR2018_CORE_vertebrates_non-redundant.meme	MA0846.1	FOXC2	WAWGTAAACAWW	1.2e-23	5.9e-21	3.42e-18
28	JASPAR2018_CORE_vertebrates_non-redundant.meme	MA0478.1	FOSL2	KRRTGASTCAB	7.53e-23	1.42e-20	8.19e-18
29	JASPAR2018_CORE_vertebrates_non-redundant.meme	MA0728.1	Nr2f6(var.2)	RAGGTCAARAGGTCA	3.54e-22	1.45e-20	8.4e-18
30	JASPAR2018_CORE_vertebrates_non-redundant.meme	MA0859.1	Rarg	RAGGTCAAAAGGTCAW	1.37e-20	5.21e-19	3.01e-16
31	JASPAR2018_CORE_vertebrates_non-redundant.meme	MA0747.1	SP8	RCCACGCCCMCY	1.23e-19	6.14e-17	3.56e-14
32	JASPAR2018_CORE_vertebrates_non-redundant.meme	MA0032.2	FOXC1	WAWGTAAAYAW	2.45e-19	9.57e-17	5.54e-14
33	JASPAR2018_CORE_vertebrates_non-redundant.meme	MA0806.1	TBX4	AGGTGTGA	4.09e-19	1.92e-16	1.11e-13
34	JASPAR2018_CORE_vertebrates_non-redundant.meme	MA0493.1	Klf1	RRCCACACCCW	6.12e-19	2.2e-16	1.27e-13
35	JASPAR2018_CORE_vertebrates_non-redundant.meme	MA0528.1	ZNF263	GGAGGAGGRRGRGGRGGRRGR	3.56e-19	2.36e-16	1.37e-13
36	JASPAR2018_CORE_vertebrates_non-redundant.meme	MA0712.1	OTX2	YTAATCCB	2.96e-18	1.36e-15	7.9e-13
37	JASPAR2018_CORE_vertebrates_non-redundant.meme	MA0879.1	Dlx1	NVTAATTANN	8.59e-18	5.27e-15	3.05e-12
38	JASPAR2018_CORE_vertebrates_non-redundant.meme	MA0845.1	FOXB1	WATGTAAATAT	1.93e-16	5.31e-14	3.07e-11
39	JASPAR2018_CORE_vertebrates_non-redundant.meme	MA0742.1	Klf12	GRCCACGCCCWHHWH	4.27e-15	5.6e-13	3.24e-10
40	JASPAR2018_CORE_vertebrates_non-redundant.meme	MA0517.1	STAT1::STAT2	THAGTTTCRKTTTCY	5.04e-15	1.62e-12	9.38e-10
41	JASPAR2018_CORE_vertebrates_non-redundant.meme	MA1152.1	SOX15	CYWTTGTTHW	2.73e-15	2.37e-12	1.37e-09
42	JASPAR2018_CORE_vertebrates_non-redundant.meme	MA0891.1	GSC2	NYTAATCCBH	6.71e-15	2.46e-12	1.43e-09
43	JASPAR2018_CORE_vertebrates_non-redundant.meme	MA0851.1	Foxj3	NDAADGTAAACAAANNM	9.1e-15	2.95e-12	1.71e-09
44	JASPAR2018_CORE_vertebrates_non-redundant.meme	MA0494.1	Nr1h3::Rxra	TGACCTNNAGTRACCYYDN	3.53e-14	1.04e-11	6e-09
45	JASPAR2018_CORE_vertebrates_non-redundant.meme	MA0778.1	NFKB2	AGGGGAWTCCCCY	1.73e-13	2.76e-11	1.6e-08
46	JASPAR2018_CORE_vertebrates_non-redundant.meme	MA0824.1	ID4	NRCACCTGBH	1.73e-13	7.79e-11	4.51e-08
47	JASPAR2018_CORE_vertebrates_non-redundant.meme	MA0039.3	KLF4	MCACACCCTNN	3.32e-13	1.34e-10	7.77e-08
48	JASPAR2018_CORE_vertebrates_non-redundant.meme	MA0595.1	SREBF1	VTCACCCCAY	8.15e-13	2.26e-10	1.31e-07
49	JASPAR2018_CORE_vertebrates_non-redundant.meme	MA0746.1	SP3	VCCACGCCCMC	6.72e-13	4.24e-10	2.46e-07
50	JASPAR2018_CORE_vertebrates_non-redundant.meme	MA0857.1	Rarb	AAAGGTCAAAAGGTCA	2.62e-11	7.61e-10	4.41e-07
51	JASPAR2018_CORE_vertebrates_non-redundant.meme	MA0160.1	NR4A2	AAGGTCAC	1.31e-12	9.14e-10	5.29e-07
52	JASPAR2018_CORE_vertebrates_non-redundant.meme	MA0910.1	Hoxd8	TAADTAATTAATRGCTN	3.5e-12	9.2e-10	5.33e-07
53	JASPAR2018_CORE_vertebrates_non-redundant.meme	MA0483.1	Gfi1b	AAATCWCWGCH	5.95e-12	2.35e-09	1.36e-06
54	JASPAR2018_CORE_vertebrates_non-redundant.meme	MA0130.1	ZNF354C	MTCCAC	7.4e-12	5.42e-09	3.14e-06
55	JASPAR2018_CORE_vertebrates_non-redundant.meme	MA0790.1	POU4F1	ATGMATAATTAATG	3.55e-11	9.22e-09	5.34e-06
56	JASPAR2018_CORE_vertebrates_non-redundant.meme	MA0807.1	TBX5	AGGTGTKA	2.48e-11	1.42e-08	8.22e-06
57	JASPAR2018_CORE_vertebrates_non-redundant.meme	MA1114.1	PBX3	NNNTGAGTGACAGGBNN	6.66e-11	2.11e-08	1.22e-05
58	JASPAR2018_CORE_vertebrates_non-redundant.meme	MA0073.1	RREB1	CCCCMAAMCAMCCMCMMMCV	7.4e-10	4.88e-08	2.83e-05
59	JASPAR2018_CORE_vertebrates_non-redundant.meme	MA0149.1	EWSR1-FLI1	GGAAGGAAGGAAGGAAGG	4.47e-09	7.59e-08	4.4e-05
60	JASPAR2018_CORE_vertebrates_non-redundant.meme	MA0740.1	KLF14	KRCCACGCCCMCYT	1.13e-09	1.63e-07	9.44e-05
61	JASPAR2018_CORE_vertebrates_non-redundant.meme	MA0602.1	Arid5a	SYAATATTGVDANH	2.45e-09	8.59e-07	0.000497
62	JASPAR2018_CORE_vertebrates_non-redundant.meme	MA0830.1	TCF4	HRCACCTGBN	4.99e-09	2.66e-06	0.00154
63	JASPAR2018_CORE_vertebrates_non-redundant.meme	MA0488.1	JUN	DDRATGATGTCAT	3.32e-08	4.32e-06	0.0025
64	JASPAR2018_CORE_vertebrates_non-redundant.meme	MA0601.1	Arid3b	ATATTAATWAN	1.26e-08	5.39e-06	0.00312
65	JASPAR2018_CORE_vertebrates_non-redundant.meme	MA0492.1	JUND(var.2)	DDDRATGABGTCATN	8.41e-08	1.05e-05	0.00609
66	JASPAR2018_CORE_vertebrates_non-redundant.meme	MA0803.1	TBX15	AGGTGTGA	3.99e-08	1.11e-05	0.00644
67	JASPAR2018_CORE_vertebrates_non-redundant.meme	MA0745.1	SNAI2	DRCAGGTGB	2.3e-08	1.35e-05	0.00779
68	JASPAR2018_CORE_vertebrates_non-redundant.meme	MA0095.2	YY1	CAARATGGCBGC	4.57e-08	1.35e-05	0.00783
69	JASPAR2018_CORE_vertebrates_non-redundant.meme	MA0505.1	Nr5a2	RAGTTCAAGGYCAGS	8.52e-08	2.44e-05	0.0141
70	JASPAR2018_CORE_vertebrates_non-redundant.meme	MA0791.1	POU4F3	RTGMATWATTAATGAR	1.1e-07	2.48e-05	0.0144
71	JASPAR2018_CORE_vertebrates_non-redundant.meme	MA0805.1	TBX1	AGGTGTGA	7.86e-08	2.72e-05	0.0157
72	JASPAR2018_CORE_vertebrates_non-redundant.meme	MA0513.1	SMAD2::SMAD3::SMAD4	CTGTCTGDCACCT	9.12e-08	3.43e-05	0.0199
73	JASPAR2018_CORE_vertebrates_non-redundant.meme	MA0046.2	HNF1A	DRTTAATNATTAACN	1.01e-06	0.000138	0.0797
74	JASPAR2018_CORE_vertebrates_non-redundant.meme	MA0913.1	Hoxd9	GYAATWAAAW	3.67e-07	0.000219	0.127
75	JASPAR2018_CORE_vertebrates_non-redundant.meme	MA0788.1	POU3F3	WWTATGCWAATTW	8.81e-07	0.000229	0.133
76	JASPAR2018_CORE_vertebrates_non-redundant.meme	MA0685.1	SP4	BWRGCCACGCCCMCTYH	7.55e-06	0.000385	0.223
77	JASPAR2018_CORE_vertebrates_non-redundant.meme	MA0599.1	KLF5	GCCCCDCCCH	7.5e-07	0.000434	0.251
78	JASPAR2018_CORE_vertebrates_non-redundant.meme	MA0140.2	GATA1::TAL1	MTTATCWSNNNNNHVCAG	3.53e-06	0.000546	0.316
79	JASPAR2018_CORE_vertebrates_non-redundant.meme	MA0471.1	E2F6	RGGCGGGARRV	1.76e-06	0.000763	0.442
80	JASPAR2018_CORE_vertebrates_non-redundant.meme	MA0822.1	HES7	YGGCACGTGCCR	8.02e-05	0.00112	0.65
81	JASPAR2018_CORE_vertebrates_non-redundant.meme	MA0715.1	PROP1	TAATYWAATTA	7.84e-06	0.00131	0.758
82	JASPAR2018_CORE_vertebrates_non-redundant.meme	MA0522.2	TCF3	HRCACCTGBN	2.79e-06	0.00165	0.955
83	JASPAR2018_CORE_vertebrates_non-redundant.meme	MA0507.1	POU2F2	YDNATTTGCATRT	8.4e-06	0.00185	1.07
84	JASPAR2018_CORE_vertebrates_non-redundant.meme	MA0757.1	ONECUT3	AAAAAATCRATAAH	1.83e-05	0.00205	1.18
85	JASPAR2018_CORE_vertebrates_non-redundant.meme	MA0491.1	JUND	DRTGASTCATS	1.7e-05	0.00212	1.23
86	JASPAR2018_CORE_vertebrates_non-redundant.meme	MA1104.1	GATA6	NDNAGATAAGADD	6.85e-06	0.00243	1.41
87	JASPAR2018_CORE_vertebrates_non-redundant.meme	MA1142.1	FOSL1::JUND	NRTGACTCAT	5.99e-06	0.00249	1.44
88	JASPAR2018_CORE_vertebrates_non-redundant.meme	MA0102.3	CEBPA	ATTGCAYAAYH	8.42e-06	0.00272	1.57
89	JASPAR2018_CORE_vertebrates_non-redundant.meme	MA1141.1	FOS::JUND	NKATGAGTCATNN	3.4e-05	0.00604	3.5
90	JASPAR2018_CORE_vertebrates_non-redundant.meme	MA0683.1	POU4F2	RTGCATAATTAATGAG	0.000153	0.0064	3.7
91	JASPAR2018_CORE_vertebrates_non-redundant.meme	MA0871.1	TFEC	RTCACRTGAB	3.67e-05	0.00874	5.06
92	JASPAR2018_CORE_vertebrates_non-redundant.meme	MA0103.3	ZEB1	SNCACCTGSVN	1.5e-05	0.00894	5.18
93	JASPAR2018_CORE_vertebrates_non-redundant.meme	MA1099.1	Hes1	SVCACGYGHN	3.98e-05	0.00923	5.35
94	JASPAR2018_CORE_vertebrates_non-redundant.meme	MA0821.1	HES5	YGGCACGTGCCR	0.00061	0.0103	5.98
95	JASPAR2018_CORE_vertebrates_non-redundant.meme	MA0673.1	NKX2-8	VCACTTSAV	1.58e-05	0.0105	6.1
96	JASPAR2018_CORE_vertebrates_non-redundant.meme	MA0847.1	FOXD2	GTAAACA	2.37e-05	0.0114	6.61
97	JASPAR2018_CORE_vertebrates_non-redundant.meme	MA0139.1	CTCF	YGRCCASYAGRKGGCRSYR	8.02e-05	0.0119	6.88
98	JASPAR2018_CORE_vertebrates_non-redundant.meme	MA0003.3	TFAP2A	HGCCYSAGGCD	2.31e-05	0.0135	7.84
99	JASPAR2018_CORE_vertebrates_non-redundant.meme	MA0786.1	POU3F1	WTATGCWAATKW	4.3e-05	0.0136	7.9
100	JASPAR2018_CORE_vertebrates_non-redundant.meme	MA0703.1	LMX1B	NYAATTAA	2.56e-05	0.0137	7.92
101	JASPAR2018_CORE_vertebrates_non-redundant.meme	MA0687.1	SPIC	HAAAAGVGGAAGTA	4.33e-05	0.0161	9.35
102	JASPAR2018_CORE_vertebrates_non-redundant.meme	MA0655.1	JDP2	ATGACTCAT	0.000247	0.0169	9.79

## Sheet: GM12878
Rank	Motif DB	Motif ID	TF	Consensus	P-value	Adjusted P-value	E-value
1	JASPAR2018_CORE_vertebrates_non-redundant.meme	MA0660.1	MEF2B	RCTAWAAATAGC	2.56e-66	2.68e-64	1.55e-61
2	JASPAR2018_CORE_vertebrates_non-redundant.meme	MA1125.1	ZNF384	DNWMAAAAAAAA	5.66e-67	3.83e-64	2.22e-61
3	JASPAR2018_CORE_vertebrates_non-redundant.meme	MA0773.1	MEF2D	DCTAWAAATAGM	1.11e-65	1.16e-63	6.7e-61
4	JASPAR2018_CORE_vertebrates_non-redundant.meme	MA0497.1	MEF2C	DDDCYAAAAATAGMW	2e-57	7.01e-55	4.06e-52
5	JASPAR2018_CORE_vertebrates_non-redundant.meme	MA0050.2	IRF1	NTTYASTTTCACTTTCDBTTT	1.41e-44	5.23e-42	3.03e-39
6	JASPAR2018_CORE_vertebrates_non-redundant.meme	MA0041.1	Foxd3	GWWTGTTTDTTT	2.88e-40	1.19e-37	6.87e-35
7	JASPAR2018_CORE_vertebrates_non-redundant.meme	MA0146.2	Zfx	SSSGCCBVGGCCTS	8.34e-39	3.71e-36	2.15e-33
8	JASPAR2018_CORE_vertebrates_non-redundant.meme	MA0719.1	RHOXF1	NTRATCCN	5.32e-33	3.54e-30	2.05e-27
9	JASPAR2018_CORE_vertebrates_non-redundant.meme	MA0017.2	NR2F1	CARAGGTCAMVNG	4.23e-32	1.45e-29	8.39e-27
10	JASPAR2018_CORE_vertebrates_non-redundant.meme	MA0682.1	Pitx1	YTAATCCH	2.18e-30	8.57e-28	4.96e-25
11	JASPAR2018_CORE_vertebrates_non-redundant.meme	MA0711.1	OTX1	HTAATCCS	1.49e-24	4.16e-22	2.41e-19
12	JASPAR2018_CORE_vertebrates_non-redundant.meme	MA0714.1	PITX3	NYTAATCCC	1.49e-22	5.26e-20	3.04e-17
13	JASPAR2018_CORE_vertebrates_non-redundant.meme	MA0018.3	CREB1	NVTGACGTCABN	1.59e-21	2.54e-19	1.47e-16
14	JASPAR2018_CORE_vertebrates_non-redundant.meme	MA0801.1	MGA	AGGTGTGA	3.02e-21	9.5e-19	5.5e-16
15	JASPAR2018_CORE_vertebrates_non-redundant.meme	MA1107.1	KLF9	VSCCACACCCACH	9.12e-21	2.93e-18	1.69e-15
16	JASPAR2018_CORE_vertebrates_non-redundant.meme	MA0712.1	OTX2	YTAATCCB	4.87e-20	1.62e-17	9.39e-15
17	JASPAR2018_CORE_vertebrates_non-redundant.meme	MA0829.1	Srebf1(var.2)	ATCACGTGAY	9.29e-19	6.87e-17	3.98e-14
18	JASPAR2018_CORE_vertebrates_non-redundant.meme	MA0052.3	MEF2A	KCTAWAAATAGM	7.18e-19	7.54e-17	4.37e-14
19	JASPAR2018_CORE_vertebrates_non-redundant.meme	MA0859.1	Rarg	RAGGTCAAAAGGTCAW	2.13e-17	6.4e-16	3.7e-13
20	JASPAR2018_CORE_vertebrates_non-redundant.meme	MA0019.1	Ddit3::Cebpa	VNRTGCAATMCC	2.22e-17	6.54e-15	3.79e-12
21	JASPAR2018_CORE_vertebrates_non-redundant.meme	MA0014.3	PAX5	RRGCGTGACCNN	9.38e-17	1.85e-14	1.07e-11
22	JASPAR2018_CORE_vertebrates_non-redundant.meme	MA0111.1	Spz1	AGGGTWWCAGC	9.89e-17	3.61e-14	2.09e-11
23	JASPAR2018_CORE_vertebrates_non-redundant.meme	MA0728.1	Nr2f6(var.2)	RAGGTCAARAGGTCA	4.42e-15	1.28e-13	7.43e-11
24	JASPAR2018_CORE_vertebrates_non-redundant.meme	MA0528.1	ZNF263	GGAGGAGGRRGRGGRGGRRGR	1.13e-15	7.06e-13	4.09e-10
25	JASPAR2018_CORE_vertebrates_non-redundant.meme	MA0879.1	Dlx1	NVTAATTANN	1.8e-15	8.32e-13	4.82e-10
26	JASPAR2018_CORE_vertebrates_non-redundant.meme	MA0079.3	SP1	GCCCCKCCCCC	1.25e-14	6.71e-12	3.88e-09
27	JASPAR2018_CORE_vertebrates_non-redundant.meme	MA0846.1	FOXC2	WAWGTAAACAWW	2.02e-14	7.62e-12	4.41e-09
28	JASPAR2018_CORE_vertebrates_non-redundant.meme	MA0483.1	Gfi1b	AAATCWCWGCH	6.21e-14	1.99e-11	1.15e-08
29	JASPAR2018_CORE_vertebrates_non-redundant.meme	MA0516.1	SP2	GYCCCGCCYCYBSSS	7.1e-14	3.33e-11	1.93e-08
30	JASPAR2018_CORE_vertebrates_non-redundant.meme	MA0891.1	GSC2	NYTAATCCBH	3.26e-13	8.99e-11	5.21e-08
31	JASPAR2018_CORE_vertebrates_non-redundant.meme	MA0039.3	KLF4	MCACACCCTNN	4.13e-13	1.41e-10	8.17e-08
32	JASPAR2018_CORE_vertebrates_non-redundant.meme	MA0032.2	FOXC1	WAWGTAAAYAW	7.12e-13	2.14e-10	1.24e-07
33	JASPAR2018_CORE_vertebrates_non-redundant.meme	MA0494.1	Nr1h3::Rxra	TGACCTNNAGTRACCYYDN	1.17e-12	2.59e-10	1.5e-07
34	JASPAR2018_CORE_vertebrates_non-redundant.meme	MA0845.1	FOXB1	WATGTAAATAT	4.06e-12	8.2e-10	4.75e-07
35	JASPAR2018_CORE_vertebrates_non-redundant.meme	MA0746.1	SP3	VCCACGCCCMC	7.1e-12	3.59e-09	2.08e-06
36	JASPAR2018_CORE_vertebrates_non-redundant.meme	MA0693.2	VDR	YRRGTTCA	7.8e-12	4.37e-09	2.53e-06
37	JASPAR2018_CORE_vertebrates_non-redundant.meme	MA0742.1	Klf12	GRCCACGCCCWHHWH	1.35e-10	1.36e-08	7.87e-06
38	JASPAR2018_CORE_vertebrates_non-redundant.meme	MA0851.1	Foxj3	NDAADGTAAACAAANNM	1.09e-10	2.77e-08	1.6e-05
39	JASPAR2018_CORE_vertebrates_non-redundant.meme	MA0595.1	SREBF1	VTCACCCCAY	1.54e-10	3.09e-08	1.79e-05
40	JASPAR2018_CORE_vertebrates_non-redundant.meme	MA0478.1	FOSL2	KRRTGASTCAB	2.41e-10	3.4e-08	1.97e-05
41	JASPAR2018_CORE_vertebrates_non-redundant.meme	MA0493.1	Klf1	RRCCACACCCW	1.44e-10	4.61e-08	2.67e-05
42	JASPAR2018_CORE_vertebrates_non-redundant.meme	MA0747.1	SP8	RCCACGCCCMCY	1.3e-10	5.49e-08	3.18e-05
43	JASPAR2018_CORE_vertebrates_non-redundant.meme	MA0857.1	Rarb	AAAGGTCAAAAGGTCA	3.47e-09	7.63e-08	4.42e-05
44	JASPAR2018_CORE_vertebrates_non-redundant.meme	MA1114.1	PBX3	NNNTGAGTGACAGGBNN	3.34e-10	8.85e-08	5.12e-05
45	JASPAR2018_CORE_vertebrates_non-redundant.meme	MA0596.1	SREBF2	RTGGGGTGAY	7.35e-10	1.72e-07	9.96e-05
46	JASPAR2018_CORE_vertebrates_non-redundant.meme	MA0814.1	TFAP2C(var.2)	HGCCTSAGGCD	5.99e-10	2.71e-07	0.000157
47	JASPAR2018_CORE_vertebrates_non-redundant.meme	MA0149.1	EWSR1-FLI1	GGAAGGAAGGAAGGAAGG	1.94e-08	3.68e-07	0.000213
48	JASPAR2018_CORE_vertebrates_non-redundant.meme	MA0740.1	KLF14	KRCCACGCCCMCYT	3.18e-09	4.01e-07	0.000232
49	JASPAR2018_CORE_vertebrates_non-redundant.meme	MA0517.1	STAT1::STAT2	THAGTTTCRKTTTCY	1.66e-09	5.22e-07	0.000302
50	JASPAR2018_CORE_vertebrates_non-redundant.meme	MA0073.1	RREB1	CCCCMAAMCAMCCMCMMMCV	1.15e-08	6.57e-07	0.00038
51	JASPAR2018_CORE_vertebrates_non-redundant.meme	MA0471.1	E2F6	RGGCGGGARRV	3.35e-09	1.27e-06	0.000735
52	JASPAR2018_CORE_vertebrates_non-redundant.meme	MA1152.1	SOX15	CYWTTGTTHW	2.62e-09	1.94e-06	0.00112
53	JASPAR2018_CORE_vertebrates_non-redundant.meme	MA0830.1	TCF4	HRCACCTGBN	2.01e-08	9.32e-06	0.0054
54	JASPAR2018_CORE_vertebrates_non-redundant.meme	MA0821.1	HES5	YGGCACGTGCCR	9.83e-07	1.38e-05	0.00797
55	JASPAR2018_CORE_vertebrates_non-redundant.meme	MA0095.2	YY1	CAARATGGCBGC	1.21e-07	2.85e-05	0.0165
56	JASPAR2018_CORE_vertebrates_non-redundant.meme	MA0822.1	HES7	YGGCACGTGCCR	2.49e-06	3.49e-05	0.0202
57	JASPAR2018_CORE_vertebrates_non-redundant.meme	MA0470.1	E2F4	GGGCGGGAARN	2.62e-07	4.79e-05	0.0277
58	JASPAR2018_CORE_vertebrates_non-redundant.meme	MA0831.2	TFE3	CACGTGAY	5.18e-07	9.43e-05	0.0546
59	JASPAR2018_CORE_vertebrates_non-redundant.meme	MA0806.1	TBX4	AGGTGTGA	2.79e-07	9.59e-05	0.0555
60	JASPAR2018_CORE_vertebrates_non-redundant.meme	MA0130.1	ZNF354C	MTCCAC	1.64e-07	0.000106	0.0614
61	JASPAR2018_CORE_vertebrates_non-redundant.meme	MA0788.1	POU3F3	WWTATGCWAATTW	5.9e-07	0.000126	0.0731
62	JASPAR2018_CORE_vertebrates_non-redundant.meme	MA0823.1	HEY1	GRCACGTGCC	1.89e-06	0.000193	0.112
63	JASPAR2018_CORE_vertebrates_non-redundant.meme	MA0513.1	SMAD2::SMAD3::SMAD4	CTGTCTGDCACCT	7.44e-07	0.000227	0.131
64	JASPAR2018_CORE_vertebrates_non-redundant.meme	MA0803.1	TBX15	AGGTGTGA	2.49e-06	0.000514	0.297
65	JASPAR2018_CORE_vertebrates_non-redundant.meme	MA0648.1	GSC	VYTAATCCSY	2.1e-06	0.000546	0.316
66	JASPAR2018_CORE_vertebrates_non-redundant.meme	MA0602.1	Arid5a	SYAATATTGVDANH	2.73e-06	0.00072	0.417
67	JASPAR2018_CORE_vertebrates_non-redundant.meme	MA0685.1	SP4	BWRGCCACGCCCMCTYH	1.49e-05	0.000789	0.457
68	JASPAR2018_CORE_vertebrates_non-redundant.meme	MA0505.1	Nr5a2	RAGTTCAAGGYCAGS	4.44e-06	0.00108	0.627
69	JASPAR2018_CORE_vertebrates_non-redundant.meme	MA0786.1	POU3F1	WTATGCWAATKW	5.11e-06	0.00125	0.722
70	JASPAR2018_CORE_vertebrates_non-redundant.meme	MA0807.1	TBX5	AGGTGTKA	2.9e-06	0.00131	0.759
71	JASPAR2018_CORE_vertebrates_non-redundant.meme	MA0824.1	ID4	NRCACCTGBH	3.35e-06	0.00133	0.768
72	JASPAR2018_CORE_vertebrates_non-redundant.meme	MA0785.1	POU2F1	AWTATGCWAATK	6.71e-06	0.0015	0.866
73	JASPAR2018_CORE_vertebrates_non-redundant.meme	MA1099.1	Hes1	SVCACGYGHN	8.17e-06	0.00164	0.95
74	JASPAR2018_CORE_vertebrates_non-redundant.meme	MA0150.2	Nfe2l2	CASNATGACTCAGCA	1.52e-05	0.00197	1.14
75	JASPAR2018_CORE_vertebrates_non-redundant.meme	MA1142.1	FOSL1::JUND	NRTGACTCAT	6.62e-06	0.00212	1.23
76	JASPAR2018_CORE_vertebrates_non-redundant.meme	MA0805.1	TBX1	AGGTGTGA	8.23e-06	0.00216	1.25
77	JASPAR2018_CORE_vertebrates_non-redundant.meme	MA0649.1	HEY2	GRCACGTGYC	2.47e-05	0.0023	1.33
78	JASPAR2018_CORE_vertebrates_non-redundant.meme	MA0784.1	POU1F1	AWTATGCWAATKAG	2.47e-05	0.00365	2.11
79	JASPAR2018_CORE_vertebrates_non-redundant.meme	MA0601.1	Arid3b	ATATTAATWAN	1.12e-05	0.00418	2.42
80	JASPAR2018_CORE_vertebrates_non-redundant.meme	MA0099.3	FOS::JUN	ATGAGTCAYM	2.31e-05	0.00419	2.43
81	JASPAR2018_CORE_vertebrates_non-redundant.meme	MA0787.1	POU3F2	WTATGCWAATKA	2.47e-05	0.00439	2.54
82	JASPAR2018_CORE_vertebrates_non-redundant.meme	MA1144.1	FOSL2::JUND	KATGACTCAT	2.96e-05	0.00442	2.56
83	JASPAR2018_CORE_vertebrates_non-redundant.meme	MA0160.1	NR4A2	AAGGTCAC	8.06e-06	0.00451	2.61
84	JASPAR2018_CORE_vertebrates_non-redundant.meme	MA1135.1	FOSB::JUNB	KRTGASTCAT	4.55e-05	0.00711	4.12
85	JASPAR2018_CORE_vertebrates_non-redundant.meme	MA1138.1	FOSL2::JUNB	KRTGASTCAT	5.03e-05	0.00742	4.3
86	JASPAR2018_CORE_vertebrates_non-redundant.meme	MA0632.1	Tcfl5	NBCDCGHGVN	4.11e-05	0.00839	4.86
87	JASPAR2018_CORE_vertebrates_non-redundant.meme	MA0913.1	Hoxd9	GYAATWAAAW	1.98e-05	0.00918	5.31
88	JASPAR2018_CORE_vertebrates_non-redundant.meme	MA0506.1	NRF1	GCGCVTGCGCR	8.89e-05	0.0116	6.7
89	JASPAR2018_CORE_vertebrates_non-redundant.meme	MA0491.1	JUND	DRTGASTCATS	0.000103	0.0116	6.73
90	JASPAR2018_CORE_vertebrates_non-redundant.meme	MA0757.1	ONECUT3	AAAAAATCRATAAH	0.000154	0.0127	7.36
91	JASPAR2018_CORE_vertebrates_non-redundant.meme	MA0871.1	TFEC	RTCACRTGAB	7.94e-05	0.0149	8.63
