# Supplementary material for: Genome-wide analysis of polymerase III–transcribed Alu elements suggests cell-type–specific enhancer function
Source: HighWire-hosted journal article supplement (doi:10.1101/gr.249789.119), 2019-08-14
Supplement: Supplemental_Table_S7.xlsx [file Supplemental_Table_S7.xlsx]

## Sheet: Sheet1
Supplemental Table S7. Overlap of expressed Alu elements with cCREs and ChromHMM enhancers.
Overlap of Alu elements with cCREs (Fig. 5C)
	Unexpressed	Expressed	Robust
total	1177485	17249	3784
overlapped	203675	5485	1333
non-overlapped	973810	11764	2451
percentage	0.172975	0.317989	0.352273
Overlap of Alu elements with cCREs-ELS (Fig. 5C)
	Unexpressed	Expressed	Robust
total	1177485	17249	3784
overlapped	161880	4235	993
non-overlapped	1015605	13014	2791
percentage	0.137479	0.245521	0.262421
Overlap of Alu elements with K562 cCREs-ELS (Fig. 5D)
	Expressed in K562	Expressed in other biosamples
total	248	17001
overlapped	49	272
non-overlapped	199	16729
percentage	0.197581	0.0159991
Overlap of Alu elements with GM12878 cCREs-ELS (Fig. 5D)
	Expressed in GM12878	Expressed in other biosamples
total	140	17109
overlapped	31	246
non-overlapped	109	16863
percentage	0.221429	0.0143784
Overlap of Alu elements with K562 strong enhancer (ChromHMM) (Fig. 5E)
	Expressed in K562	Expressed in other biosamples
total	248	17001
overlapped	75	662
non-overlapped	173	16339
percentage	0.302419	0.0389389
Overlap of Alu elements with GM12878 strong enhancer (ChromHMM) (Fig. 5E)
	Expressed in GM12878	Expressed in other biosamples
total	140	17109
overlapped	42	756
non-overlapped	98	16353
percentage	0.3	0.0441873
